# Supplementary material for: Base-mediated homologative rearrangement of nitrogen–oxygen bonds of N-methyl-N-oxyamides
Source: Chem Sci. 2023 Aug 29;14(37):10140–6. doi: 10.1039/d3sc03216g (PMC10530184; doi:10.1039/d3sc03216g)
Supplement: SC-014-D3SC03216G-s001 [file SC-014-D3SC03216G-s001.pdf]

## ELECTRONIC SUPPORTING INFORMATION

for

# Base-mediated Homologative Rearrangement of Nitrogen-Oxygen Bonds of N-Methyl-N-oxyamides

Monika Malik,<sup>a</sup> Raffaele Senatore,<sup>a</sup> Thierry Langer,<sup>a</sup> Wolfgang Holzer<sup>a</sup> and Vittorio Pace <sup>\*a,b</sup>

<sup>a</sup> University of Vienna - Department of Pharmaceutical Sciences, Division of Pharmaceutical Chemistry - Josef-Holabek-Platz 2, 1090 Vienna, Austria.

<sup>b</sup> University of Turin - Department of Chemistry - Via P. Giuria 7, 10125 Turin, Italy.

e-mail: [vittorio.pace@univie.ac.at](mailto:vittorio.pace@univie.ac.at); [vittorio.pace@unito.it](mailto:vittorio.pace@unito.it)

### TABLE OF CONTENTS

|                                                                                                                   |      |
|-------------------------------------------------------------------------------------------------------------------|------|
| Instrumentation and general analytical methods                                                                    | S2   |
| Synthesis of starting materials and their characterization                                                        | S3   |
| General procedure for the synthesis of <i>N</i> -(alkoxymethyl)amides                                             | S14  |
| <i>N</i> -(alkoxymethyl)amides: Experimental procedures and characterization                                      | S15  |
| Copies of <sup>1</sup> H- and <sup>13</sup> C-NMR spectra                                                         | S47  |
| Copies of heteronuclei NMR spectra for relevant compounds ( <sup>19</sup> F, <sup>119</sup> Sn, <sup>77</sup> Se) | S121 |
| X-Ray Analysis for compound <b>17</b>                                                                             | S124 |
| References                                                                                                        | S128 |

## Instrumentation and General Analytical Methods

Melting points were determined on a Reichert–Kofler hot-stage microscope and are uncorrected. Mass spectra were obtained on a Shimadzu QP 1000 instrument (EI, 70 eV) and on a Bruker maXis 4G instrument (ESI-TOF, HRMS).  $^1\text{H}$ ,  $^{13}\text{C}$ ,  $^{19}\text{F}$ ,  $^{119}\text{Sn}$  and  $^{77}\text{Se}$  NMR spectra were recorded with a Bruker Avance III 400 spectrometer (400 MHz for  $^1\text{H}$ , 100 MHz for  $^{13}\text{C}$ , 40 MHz for  $^{15}\text{N}$ , 376 MHz for  $^{19}\text{F}$  and 76 MHz for  $^{77}\text{Se}$ ) at 297 K using a directly detecting broadband observe (BBFO) probe.  $^1\text{H}$  and  $^{13}\text{C}$  NMR spectra were additionally recorded with a Bruker 200 spectrometer (200 MHz for  $^1\text{H}$ , 50 MHz for  $^{13}\text{C}$ ). The center of the (residual) solvent signal was used as an internal standard which was related to TMS with  $\delta$  7.26 ppm ( $^1\text{H}$  in  $\text{CDCl}_3$ ), 7.16 ppm ( $^1\text{H}$  in  $\text{C}_6\text{D}_6$ ), 2.05 ppm ( $^1\text{H}$  in acetone- $d_6$ ) and  $\delta$  77.0 ppm ( $^{13}\text{C}$  in  $\text{CDCl}_3$ ), 128.06 ( $^{13}\text{C}$  in  $\text{C}_6\text{D}_6$ ), 202.26 – 29.84 ppm ( $^{13}\text{C}$  in acetone- $d_6$ ).<sup>[1]</sup> When recording  $^1\text{H}$  spectra in acetone- $d_6$ , occasionally it could be observed the water signal in this deuterated solvent at  $\delta$  2.84 ppm; in case of recording  $^{13}\text{C}$  spectra in acetone- $d_6$  it could be noticed overlapping of alkyl-type signals at *ca.*  $\delta$  29.8 ppm.  $^{15}\text{N}$  NMR (gs-HMBC) spectra were referenced against neat, external nitromethane.  $^{19}\text{F}$  NMR spectra were referenced via the  $\Xi$  ratio (absolute referencing).  $^{77}\text{Se}$  spectra were referenced against diphenyldiselenane ( $\delta$   $\text{Ph}_2\text{Se}_2$  463 ppm).  $^{119}\text{Sn}$  NMR spectra were referenced against external  $\text{Me}_4\text{Sn}$  (0.0 ppm). Spin-spin coupling constants ( $J$ ) are given in Hz. In nearly all cases, full and unambiguous assignment of all resonances was performed by combined application of standard NMR techniques, such as APT, HSQC, HMBC, HSQCTOCSY, COSY and NOESY experiments.

Starting materials were prepared as detailed below; those ones not reported in the manuscript are indicated with the descriptor **nn-sm**, being **nn** the corresponding final compound in the manuscript. Enantiopure and racemic compounds for obtaining (*S*)-**4** and *rac*-**4** were obtained according to our previous work.<sup>[2]</sup>

All reactions were performed under an inert atmosphere of argon using standard schlenk techniques. Solvents used for running reactions were distilled over Na/benzophenone; additives were redistilled prior to use. Organolithiums were titrated prior to use. Chemicals were purchased from SigmaAldrich, Acros, Alfa Aesar, Fluorochem and TCI Europe. Solutions were evaporated under reduced pressure with a rotary evaporator. For column chromatography, silica Gel 60 (0.04-0.063 mm) was used. TLC was carried out on aluminium sheets precoated with silica gel 60F254 (Merck-Nagel, Merk); the spots were visualised under UV light ( $\lambda = 254$  nm) and/or  $\text{KMnO}_4$  (aq.) was used as revealing system.

## Synthesis of Starting Materials

Most of *N*-alkyl-*N*-alkoxyamides employed as starting materials are known substrates and were prepared as indicated below.

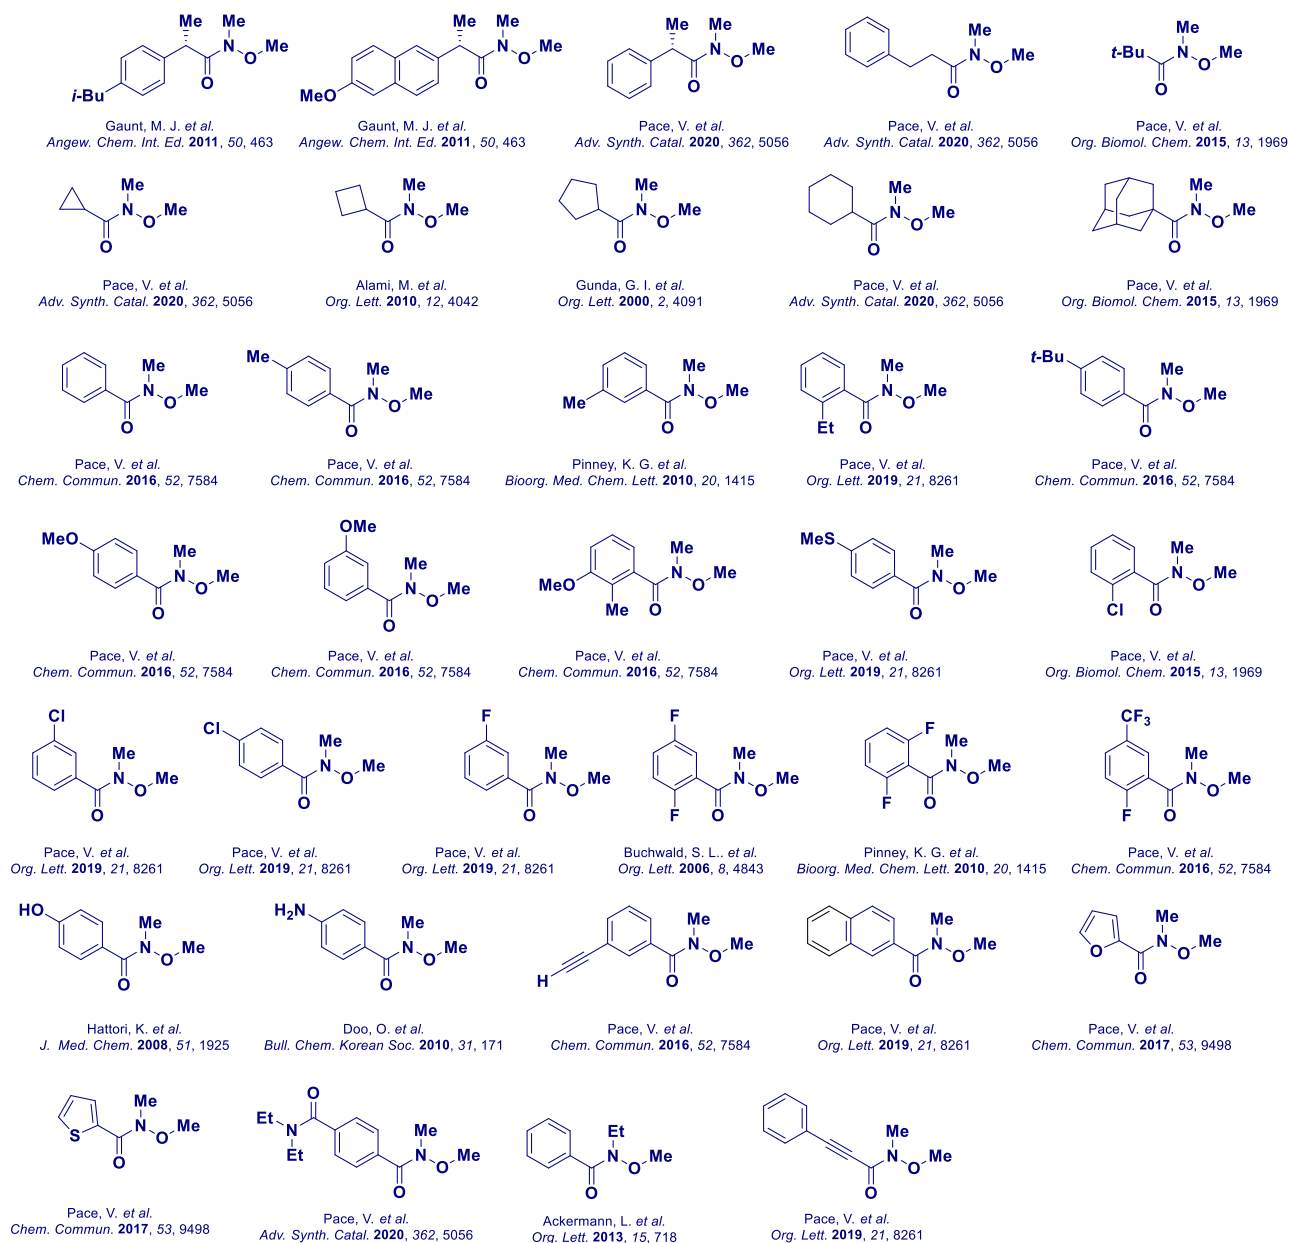

## 2-(4-isobutylphenyl)-*N*-methoxy-*N*-methylpropanamide (1)

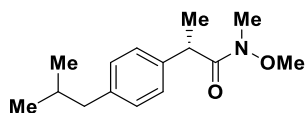

To a 50 mL round bottom flask equipped with stir bar was added (*S*)-(+)-2-(4-isobutylphenyl)propanoic acid (*S*)-Ibuprofen) (1.00 g, 4.85 mmol, 1 equiv) and dichloromethane (13 mL,  $\approx$  0.3M). To this stirred solution was added 1,1'-carbonyldiimidazole (0.87 g, 5.34 mmol, 1.1 equiv) in one portion. The solution was allowed to stir for 45 minutes. At this time, *N,O*-dimethylhydroxylamine hydrochloride (0.52 g, 5.34 mmol, 1.1 equiv) was added and the reaction mixture was stirred for six hours. The reaction mixture was then quenched with 15 mL of 1 M HCl and stirred vigorously for 10 minutes. The layers were separated and the aqueous layer was extracted with DCM (2 x 30 mL). The combine organic layers were washed with 1 M HCl, deionized water and a 1:1 mixture of brine and a saturated sodium bicarbonate solution. The organic layer was dried over Na<sub>2</sub>SO<sub>4</sub> and the solvent was removed under reduced pressure to afford the pure compound **1** in 85% yield (1.03 g) as a colorless oil.

The corresponding racemic sample has been prepared starting from racemic 2-(4-isobutylphenyl)propanoic acid and spectroscopic data match with those ones reported below.

**<sup>1</sup>H NMR** (400 MHz, CDCl<sub>3</sub>)  $\delta$ : 7.18 (m, 2H, Ph H-2,6), 7.06 (m, 2H, Ph H-3,5), 4.10 (m, COCH<sub>2</sub>CH<sub>3</sub>), 3.36 (s, 3H, NOCH<sub>3</sub>), 3.12 (s, 3H, NCH<sub>3</sub>), 2.41 (d,  $J$  = 7.2 Hz, 2H, CH<sub>2</sub>CH(CH<sub>3</sub>)<sub>2</sub>), 1.81 (m, 1H, CH<sub>2</sub>CH(CH<sub>3</sub>)<sub>2</sub>), 1.41 (d,  $J$  = 7.0 Hz, 3H, CHCH<sub>3</sub>), 0.86 (d,  $J$  = 6.6 Hz, 6H, CH<sub>2</sub>CH(CH<sub>3</sub>)<sub>2</sub>).

**<sup>13</sup>C NMR** (100 MHz, CDCl<sub>3</sub>)  $\delta$ : 175.4, 139.8, 138.9, 129.1, 127.1, 60.8, 44.8, 41.4, 32.1, 30.0, 22.2, 19.4.

**<sup>15</sup>N NMR** (40 MHz, Acetone-d<sub>6</sub>)  $\delta$ : -260.6 (NH).

**HRMS** (ESI),  $m/z$ : calcd. for C<sub>15</sub>H<sub>23</sub>NNaO<sub>2</sub><sup>+</sup>: 272.1621 [M + Na]<sup>+</sup>; found: 272.1630.

**HPLC analysis**: Chiralpak IG Column,  $\lambda$  254 nm, eluent: *n*-hexane / *i*-propanol 90:10. Flow 1 mL/min.

$[\alpha]_D^{25}$  = + 38 ( $c$  = 1, CHCl<sub>3</sub>, lit.<sup>[3]</sup> + 40,  $c$  = 1.1, CHCl<sub>3</sub>)

## HPLC Charts for Compound 1

### Racemate

Datafile Name: MAL-310\_90HEX\_10IPA\_01.lcd  
Sample Name: MAL-310\_90HEX\_10IPA\_  
Sample ID: MAL-310\_90HEX\_10IPA\_

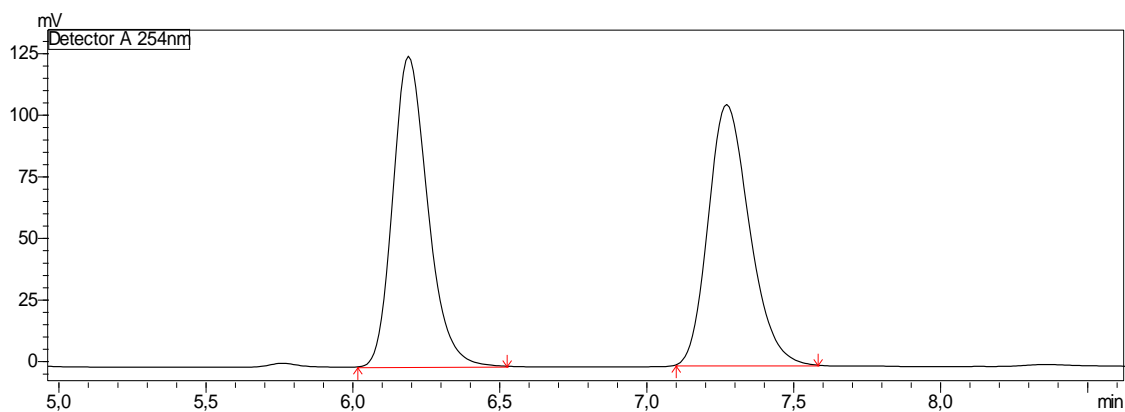

| Peaks | Retention time (min) | Area    | Area %  |
|-------|----------------------|---------|---------|
| 1     | 6,192                | 1039054 | 50,157  |
| 2     | 7,274                | 1032553 | 49,843  |
| Total |                      | 2071607 | 100,000 |

### Enantioenriched

Datafile Name: MAL-348\_90HEX\_10IPA\_01.lcd  
Sample Name: MAL-348\_90HEX\_10IPA\_  
Sample ID: MAL-348\_90HEX\_10IPA\_

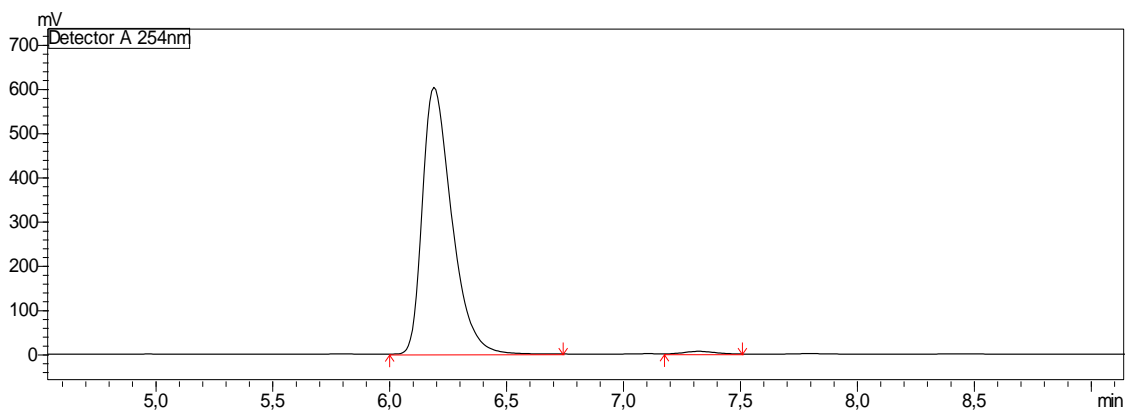

| Peaks | Retention time (min) | Area    | Area %  |
|-------|----------------------|---------|---------|
| 1     | 6,192                | 5261199 | 99,061  |
| 2     | 7,326                | 49896   | 0,939   |
| Total |                      | 5311094 | 100,000 |

***N*-methoxy-2-(6-methoxynaphthalen-2-yl)-*N*-methylpropanamide (3-*sm*)**

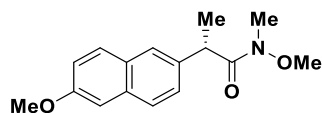

To a 50 mL round bottom flask equipped with stir bar was added (*S*)-(+)-2-(6-methoxy-2-naphthyl)propionic acid ((*S*)-naproxen) (1.00 g, 3.9 mmol, 1 equiv) and dichloromethane (13 mL,  $\approx$  0.3M). To this stirred solution was added 1,1'-carbonyl diimidazole (0.7 g, 4.3 mmol, 1.1 equiv) in one portion. The solution was allowed to stir for 45 minutes. At this time, *N*-O-dimethylhydroxylamine hydrochloride (0.42 g, 4.3 mmol, 1.1 equiv) was added and the reaction mixture was stirred for six hours. The reaction mixture was then quenched with 15 mL of 1 M HCl and stirred vigorously for 10 minutes. The layers were separated and the aqueous layer was extracted with DCM (2 x 30 mL). The combine organic layers were washed with 1 M HCl, deionized water and a 1:1 mixture of brine and a saturated sodium bicarbonate solution. The organic layer was dried over Na<sub>2</sub>SO<sub>4</sub> and the solvent was removed under reduced pressure to afford the pure compound **3-*sm*** in 85% yield (0.9 g) as a white solid.

The corresponding racemic sample has been prepared starting from racemic 2-(6-methoxy-2-naphthyl)propionic acid. Spectroscopic data match with those ones reported below.

**mp** = 59-61 °C

**<sup>1</sup>H NMR** (400 MHz, CDCl<sub>3</sub>)  $\delta$ : 7.69 (m, 3H), 7.43 (m, 1H), 7.11 (m, 2H), 4.27 (m, 1H), 3.90 (s, 3H), 3.40 (s, 3H), 3.17 (s, 3H), 1.52 (d, 3H).

**<sup>13</sup>C NMR** (100 MHz, CDCl<sub>3</sub>)  $\delta$ : 175.2, 157.6, 136.9, 133.3, 129.2, 129.1, 127.2, 126.7, 125.9, 121.6, 118.7, 105.5, 61.3, 55.5, 41.9, 32.4, 19.6.

**HRMS** (ESI), *m/z*: calcd. for C<sub>16</sub>H<sub>19</sub>NNaO<sub>3</sub><sup>+</sup>: 296.1257 [M + Na]<sup>+</sup>; found: 296.1255.

**HPLC analysis**: Chiralpak IG Column,  $\lambda$  254 nm, eluent: *n*-hexane / *i*-propanol 95:5. Flow 1 mL/min.

$[\alpha]_D^{25}$  = + 39 (*c* = 1, CHCl<sub>3</sub>, lit.<sup>[3]</sup> + 43, *c* = 1, CHCl<sub>3</sub>)

## HPLC Charts for Compound 3-sm

### Racemate

Datafile Name: MAL-362\_95HEX\_5IPA\_01.lcd  
 Sample Name: MAL-362\_95HEX\_5IPA\_  
 Sample ID: MAL-362\_95HEX\_5IPA\_

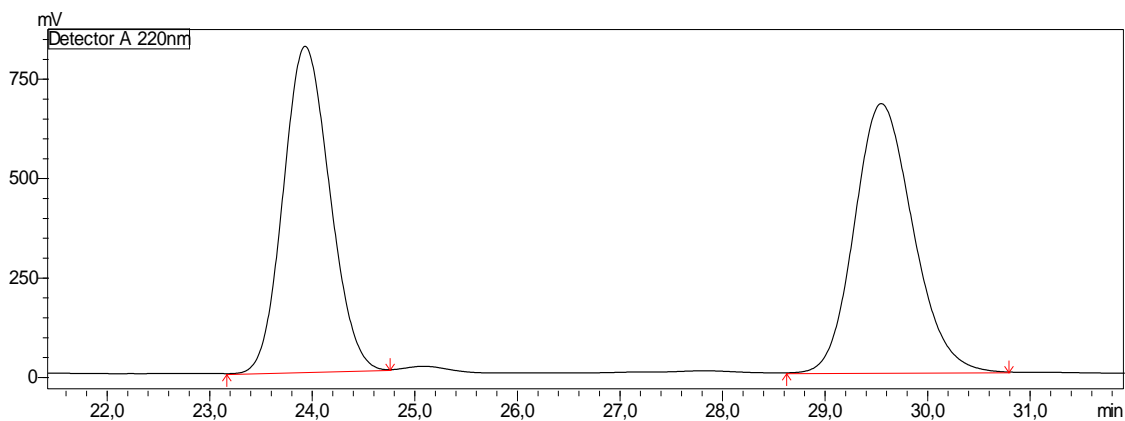

| Peaks | Retention time (min) | Area     | Area %  |
|-------|----------------------|----------|---------|
| 1     | 23,938               | 25704153 | 49,027  |
| 2     | 29,556               | 26724115 | 50,973  |
| Total |                      | 52428268 | 100,000 |

### Enantioenriched

Datafile Name: MAL-370\_95HEX\_5IPA\_03.lcd  
 Sample Name: MAL-370\_95HEX\_5IPA\_  
 Sample ID: MAL-370\_95HEX\_5IPA\_

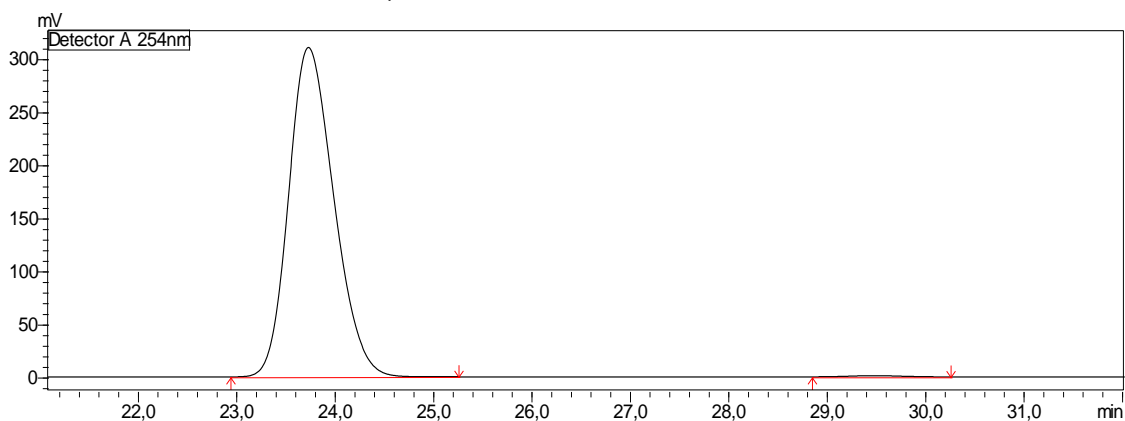

| Peaks | Retention time (min) | Area    | Area %  |
|-------|----------------------|---------|---------|
| 1     | 23,737               | 9903087 | 99,580  |
| 2     | 29,487               | 41770   | 0,420   |
| Total |                      | 9944857 | 100,000 |

General procedures for the preparation of *N*-alkyl-*N*-methoxyamides (not previously reported)

*General Procedure A for the preparation of *N*-alkyl-*N*-methoxyamides:*

To a solution of *N*-alkoxyamide (1.0 equiv) and  $K_2CO_3$  (2.0 equiv) in THF at room temperature alkyl halide (1.5 equiv) was added and the reaction was stirred overnight before quenching with  $NH_4Cl_{(aq)}$ . The two resulting phases were separated and the organic phase was dried over anhydrous  $Na_2SO_4$  and evaporated under reduced pressure to give the desired compound without further purification unless otherwise stated.

*General Procedure B for the preparation of *N*-alkoxy-*N*-methylamides:*

To a solution of *N*-hydroxy-*N*-methylbenzamide (1.0 equiv), and  $Cs_2CO_3$  (0.652 g, 2.0 mmol, 2.0 equiv) in MeCN (3.0 mL) at the room temperature alkyl halide (1.5 equiv) was added and the reaction was stirred overnight before quenching with  $NH_4Cl_{(aq)}$ . The two resulting phases were separated and the organic phase was dried over anhydrous  $Na_2SO_4$  and evaporated under reduced pressure to give the desired compound without further purification unless otherwise stated.

### *N*-ethoxy-*N*-methylbenzamide (**37-sm**)

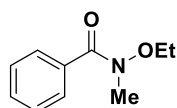

By following the general procedure A, starting from *N*-ethoxybenzamide<sup>[4]</sup> (0.165 g, 1.0 mmol, 1.0 equiv), methyl iodide (0.213 g, 1.5 mmol, 1.5 equiv) and K<sub>2</sub>CO<sub>3</sub> (0.276 g, 2.0 mmol, 2.0 equiv) in THF (3.0 mL) **37-sm** was obtained in 98% yield (0.175 g) as a yellow oil.

<sup>1</sup>H NMR (400 MHz, CDCl<sub>3</sub>) δ: 7.66-7.68 (m, 2H, Ph), 7.36-7.44 (m, 3H, Ph), 4.80 (q, 2H, CH<sub>2</sub>CH<sub>3</sub>), 3.36 (s, 3H, CH<sub>3</sub>), 1.04 (t, 3H, CH<sub>2</sub>CH<sub>3</sub>).

<sup>13</sup>C NMR (100 MHz, CDCl<sub>3</sub>) δ: 169.9, 134.2, 130.4, 128.2, 127.8, 69.4, 34.6, 13.2.

HRMS (ESI), *m/z*: calcd. for C<sub>10</sub>H<sub>14</sub>NO<sub>2</sub><sup>+</sup>: 180.1025 [M + H]<sup>+</sup>; found: 180.1031.

### *N*-ethoxy-*N*-methyl-4-methylbenzamide (**38-sm**)

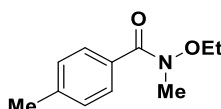

By following the general procedure A, starting from *N*-ethoxy-(4-methyl)benzamide<sup>[4]</sup> (0.179 g, 1.0 mmol, 1.0 equiv), methyl iodide (0.213 g, 1.5 mmol, 1.5 equiv) and K<sub>2</sub>CO<sub>3</sub> (0.276 g, 2.0 mmol, 2.0 equiv) in THF (3.0 mL) **38-sm** was obtained in 97% yield (0.187 g) as a yellow oil.

<sup>1</sup>H NMR (200 MHz, CDCl<sub>3</sub>) δ: 7.61 (m, 2H, Ph), 7.18 (m, 2H, Ph), 3.77 (q, 2H, CH<sub>2</sub>), 3.36 (s, 3H, CH<sub>3</sub>), 2.37 (s, 3H, CH<sub>3</sub>), 1.07 (t, 3H, CH<sub>3</sub>).

<sup>13</sup>C NMR (50 MHz, CDCl<sub>3</sub>) δ: 169.8, 140.7, 131.2, 128.5, 69.3, 34.7, 21.4, 13.3.

HRMS (ESI), *m/z*: calcd. for C<sub>11</sub>H<sub>16</sub>NO<sub>2</sub><sup>+</sup>: 194.1181 [M + H]<sup>+</sup>; found: 194.1175.

### *N*-ethoxy-*N*-methyl-3-chlorobenzamide (**39-sm**)

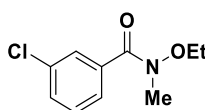

By following the general procedure A, starting from *N*-ethoxy-3-chlorobenzamide<sup>[5]</sup> (0.200 g, 1.0 mmol, 1.0 equiv), methyl iodide (0.213 g, 1.5 mmol, 1.5 equiv) and K<sub>2</sub>CO<sub>3</sub> (0.276 g, 2.0 mmol, 2.0 equiv) in THF (3.0 mL) **39-sm** was obtained in 96% yield (0.187 g) as a yellow oil.

<sup>1</sup>H NMR (200 MHz, CDCl<sub>3</sub>) δ: 7.69 (m, 1H, Ph), 7.59 (m, 1H, Ph), 7.36 (m, 2H, Ph), 3.76 (q, 2H, CH<sub>2</sub>), 3.37 (s, 3H, CH<sub>3</sub>), 1.06 (t, 3H, CH<sub>3</sub>).

<sup>13</sup>C NMR (50 MHz, CDCl<sub>3</sub>) δ: 168.2, 135.8, 133.8, 130.5, 129.2, 128.5, 126.5, 69.7, 34.4, 13.2.

HRMS (ESI), *m/z*: calcd. for C<sub>10</sub>H<sub>13</sub>ClNO<sub>2</sub><sup>+</sup>: 214.0635 [M + H]<sup>+</sup>; found: 214.0639.

#### ***N*-isopropoxy-*N*-methylbenzamide (40-*sm*)**

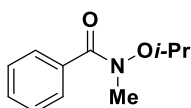

By following the general procedure B, starting from *N*-hydroxy-*N*-methylbenzamide<sup>[6]</sup> (0.151 g, 1.0 mmol, 1.0 equiv), isopropyl iodide (0.255 g, 1.5 mmol, 1.5 equiv) and Cs<sub>2</sub>CO<sub>3</sub> (0.652 g, 2.0 mmol, 2.0 equiv) in THF (3.0 mL) **40-*sm*** was obtained in 75% yield (0.187 g) as an orange oil after purification by column chromatography on silica gel (Hex:EtOAc 8:2).

<sup>1</sup>H NMR (200 MHz, CDCl<sub>3</sub>) δ: 7.65-7.69 (m, 2H, Ph), 7.32-7.49 (m, 3H, Ph), 3.99 (sept, 1H, CH(CH<sub>3</sub>)<sub>2</sub>), 3.38 (s, 3H, CH<sub>3</sub>), 1.05 (d, 6H, CH(CH<sub>3</sub>)<sub>2</sub>).

<sup>13</sup>C NMR (50 MHz, CDCl<sub>3</sub>) δ: 168.2, 135.8, 133.8, 130.5, 129.2, 128.5, 126.5, 69.7, 34.4, 13.2.

HRMS (ESI), *m/z*: calcd. for C<sub>11</sub>H<sub>16</sub>NO<sub>2</sub><sup>+</sup>: 194.1181 [M + H]<sup>+</sup>; found: 194.1174.

#### ***N*-tert-butoxy-*N*-methylbenzamide (41-*sm*)**

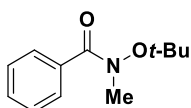

By following the general procedure A, starting from *N*-(*tert*-butoxy)benzamide<sup>[7]</sup> (0.193 g, 1.0 mmol, 1.0 equiv), methyl iodide (0.213 g, 1.5 mmol, 1.5 equiv) and K<sub>2</sub>CO<sub>3</sub> (0.276 g, 2.0 mmol, 2.0 equiv) in THF (3.0 mL) **41-*sm*** was obtained in 97% yield (0.175 g) as a yellow oil.

<sup>1</sup>H NMR (400 MHz, CDCl<sub>3</sub>) δ: 7.67 (m, 2H), 7.39 (m, 3H), 3.39 (s, 3H), 1.14 (s, 9H).

<sup>13</sup>C NMR (100 MHz, CDCl<sub>3</sub>) δ: 172.8, 135.4, 130.3, 128.8, 127.8, 83.4, 27.3.

HRMS (ESI), *m/z*: calcd. for C<sub>12</sub>H<sub>18</sub>NO<sub>2</sub><sup>+</sup>: 208.1338 [M + H]<sup>+</sup>; found: 208.1347.

#### ***N*-allyloxy-*N*-methylbenzamide (42-*sm*)**

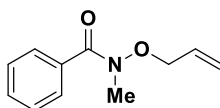

By following the general procedure A, starting from *N*-allyloxybenzamide<sup>[5]</sup> (0.177 g, 1.0 mmol, 1.0 equiv), methyl iodide (0.213 g, 1.5 mmol, 1.5 equiv) and K<sub>2</sub>CO<sub>3</sub> (0.276 g, 2.0 mmol, 2.0 equiv) in THF (3.0 mL) **42-*sm*** was obtained in 98% yield (0.187 g) as a colorless oil.

<sup>1</sup>H NMR (200 MHz, CDCl<sub>3</sub>) δ: 9.55 (brs, 1H, NH), 7.73 (m, 2H, Ph), 7.33-7.48 (m, 3H, Ph), 5.72 (m, 1H), 5.21 (m, 2H), 4.22 (m, 2H), 3.38 (s, 3H).

<sup>13</sup>C NMR (50 MHz, CDCl<sub>3</sub>) δ: 170.0, 134.2, 131.4, 130.5, 128.3, 127.9, 120.7, 75.0, 35.3.

HRMS (ESI), *m/z*: calcd. for C<sub>11</sub>H<sub>14</sub>NO<sub>2</sub><sup>+</sup>: 192.1025 [M + H]<sup>+</sup>; found: 192.1032.

#### ***N*-methyl-*N*-(prop-2-yn-1-yloxy)benzamide (**43-sm**)**

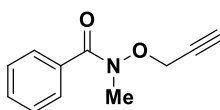

By following the general procedure B, starting from *N*-hydroxy-*N*-methylbenzamide<sup>[6]</sup> (0.151 g, 1.0 mmol, 1.0 equiv), propargyl bromide (0.178 g, 1.5 mmol, 1.5 equiv) and Cs<sub>2</sub>CO<sub>3</sub> (0.652 g, 2.0 mmol, 2.0 equiv) in THF (3.0 mL) **43-sm** was obtained in 96% yield (0.181 g) as an orange oil with no need of purification.

<sup>1</sup>H NMR (200 MHz, CDCl<sub>3</sub>) δ: 7.64-7.68 (m, 2H, Ph), 7.36-7.49 (m, 3H, Ph), 4.40 (d, 2H, CH<sub>2</sub>), 3.45 (s, 3H, CH<sub>3</sub>), 2.49 (t, 1H, CH).

<sup>13</sup>C NMR (50 MHz, CDCl<sub>3</sub>) δ: 134.0, 130.7, 128.3, 128.1, 76.6, 61.6, 36.8.

HRMS (ESI), *m/z*: calcd. for C<sub>11</sub>H<sub>12</sub>NO<sub>2</sub><sup>+</sup>: 190.0868 [M + H]<sup>+</sup>; found: 190.0873.

#### ***N*-(cyclopropylmethoxy)-*N*-methylbenzamide (**44-sm**)**

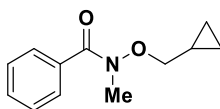

By following the general procedure B, starting from *N*-hydroxy-*N*-methylbenzamide<sup>[6]</sup> (0.151 g, 1.0 mmol, 1.0 equiv), cyclopropylmethyl bromide (0.203 g, 1.5 mmol, 1.5 equiv) and Cs<sub>2</sub>CO<sub>3</sub> (0.652 g, 2.0 mmol, 2.0 equiv) in THF (3.0 mL) **44-sm** was obtained in 95% yield (0.195 g) as a colorless oil with no need of purification.

<sup>1</sup>H NMR (200 MHz, CDCl<sub>3</sub>) δ: 7.67-7.71 (m, 2H, Ph), 7.35-7.45 (m, 3H, Ph), 3.50 (d, 2H, CH<sub>2</sub>), 3.39 (s, 3H, CH<sub>3</sub>), 0.85 (m, 1H, CH), 0.46 (m, 2H), 0.03 (m, 2H).

<sup>13</sup>C NMR (50 MHz, CDCl<sub>3</sub>) δ: 168.2, 135.8, 133.8, 130.5, 129.2, 128.5, 126.5, 69.7, 34.4, 13.2.

HRMS (ESI), *m/z*: calcd. for C<sub>12</sub>H<sub>16</sub>NO<sub>2</sub><sup>+</sup>: 206.1181 [M + H]<sup>+</sup>; found: 206.1173.

#### ***N*-(methoxymethoxy)-*N*-methylbenzamide (**45-sm**)**

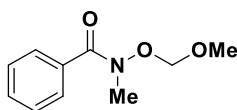

By following the general procedure B, starting from *N*-hydroxy-*N*-methylbenzamide<sup>[6]</sup> (0.151 g, 1.0 mmol, 1.0 equiv), bromomethyl methyl ether (0.188 g, 1.5 mmol, 1.5 equiv) and Cs<sub>2</sub>CO<sub>3</sub> (0.652 g, 2.0 mmol, 2.0 equiv) in THF (3.0 mL) **45-sm** was obtained in 85% yield (0.166 g) as a colorless oil after purification by column chromatography on silica gel (Hex:EtOAc 7:3).

<sup>1</sup>H NMR (200 MHz, CDCl<sub>3</sub>) δ: 7.61 (m, 2H, Ph), 7.42 (m, 3H, Ph), 4.92 (s, 2H, CH<sub>2</sub>), 3.44 (s, 3H, CH<sub>3</sub>), 3.27 (s, 3H, CH<sub>3</sub>).

<sup>13</sup>C NMR (50 MHz, CDCl<sub>3</sub>) δ: 171.0, 133.7, 131.0, 128.3, 128.0, 108.2, 103.7, 39.5

HRMS (ESI), *m/z*: calcd. for C<sub>10</sub>H<sub>14</sub>NO<sub>3</sub><sup>+</sup>: 196.0968 [M + H]<sup>+</sup>; found: 196.0954.

### *N*-phenoxy-*N*-methylbenzamide (**46-sm**)

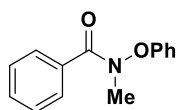

By following the general procedure A, starting from *N*-phenoxybenzamide<sup>[8]</sup> (0.213 g, 1.0 mmol, 1.0 equiv), methyl iodide (0.213 g, 1.5 mmol, 1.5 equiv) and K<sub>2</sub>CO<sub>3</sub> (0.276 g, 2.0 mmol, 2.0 equiv) in THF (3.0 mL) **46-sm** was obtained in 96% yield (0.218 g) as a yellow oil.

<sup>1</sup>H NMR (200 MHz, CDCl<sub>3</sub>) δ: 7.62 (m, 2H, Ph), 7.26-7.45 (m, 5H, Ph), 6.97-7.11 (m, 3H, Ph), 3.44 (s, 3H, CH<sub>3</sub>).

<sup>13</sup>C NMR (50 MHz, CDCl<sub>3</sub>) δ: 157.4, 133.3, 131.1, 129.9, 128.1, 128.0, 123.2, 113.3, 35.7.

HRMS (ESI), *m/z*: calcd. for C<sub>14</sub>H<sub>14</sub>NO<sub>2</sub><sup>+</sup>: 228.1019 [M + H]<sup>+</sup>; found: 228.1023.

### *N*-benzyloxy-*N*-methylbenzamide (**47-sm**)<sup>[9]</sup>

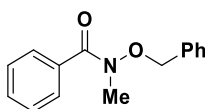

To a solution of benzoyl chloride (1.0 equiv, 3.6 mmol, 0.500 g) in Et<sub>2</sub>O was added *O*-benzylhydroxylamine hydrochloride (1.1 equiv, 3.9 mmol, 0.624 g) and the resulting suspension was cooled to 0°C. Afterwards, an aqueous solution of potassium carbonate (2.2 equiv, 7.8 mmol, 1.082 g) was added during 2 min. The resulting mixture was stirred at room temperature overnight and subsequently H<sub>2</sub>O was added. The two resulting phases were separated and, the organic phase was dried over anhydrous Na<sub>2</sub>SO<sub>4</sub>, filtered and removed in vacuo to give *N*-benzyloxybenzamide as an oil in 98% yield with no need of purification. <sup>1</sup>H NMR (200 MHz, CDCl<sub>3</sub>) δ: 8.51 (NH), 7.66 (m, 2H, Ph), 7.37-7.55 (m, 3H, Ph), 5.04 (s, 2H, CH<sub>2</sub>). <sup>13</sup>C NMR (50 MHz, CDCl<sub>3</sub>) δ: 135.2, 132.1, 131.9, 129.3, 128.8, 128.7, 128.7, 127.0, 78.4.

By following the general procedure A, the above prepared *N*-benzyloxybenzamide (0.227 g, 1.0 mmol, 1.0 equiv) was reacted with methyl iodide (0.213 g, 1.5 mmol, 1.5 equiv) and K<sub>2</sub>CO<sub>3</sub> (0.276 g, 2.0 mmol, 2.0 equiv) in THF (3.0 mL), furnishing **47-sm** in 98% yield (0.236 g) as a yellow oil.

<sup>1</sup>H NMR (400 MHz, CDCl<sub>3</sub>) δ: 7.53 (m, 2H, Ph), 7.37 (m, 1H, Ph), 7.31 (m, 2H, Ph), 7.21 (m, 3H, Ph), 7.00 (m, 2H, Ph), 4.60 (s, 2H, CH<sub>2</sub>), 3.28 (s, 3H, CH<sub>3</sub>).

<sup>13</sup>C NMR (100 MHz, CDCl<sub>3</sub>) δ: 170.1, 134.3, 134.1, 130.4, 129.4, 128.8, 128.4, 128.2, 127.9.

HRMS (ESI), *m/z*: calcd. for C<sub>15</sub>H<sub>16</sub>NO<sub>2</sub><sup>+</sup>: 242.1181 [M + H]<sup>+</sup>; found: 242.1185.

### *N*-([1,1'-biphenyl]-4-ylmethoxy)-*N*-methylbenzamide (**48-sm**)

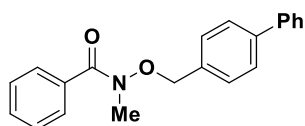

By following the general procedure B, starting from *N*-hydroxy-*N*-methylbenzamide<sup>[6]</sup> (0.151 g, 1.0 mmol, 1.0 equiv), 4-(bromomethyl)-1,1'-biphenyl (0.371 g, 1.5 mmol, 1.5 equiv) and Cs<sub>2</sub>CO<sub>3</sub> (0.652 g, 2.0 mmol, 2.0 equiv) in THF (3.0 mL), **48-sm** was obtained in 90% yield (0.285 g) as a colorless oil after purification by column chromatography on silica gel (Hex:EtOAc 7:3).

**<sup>1</sup>H NMR** (200 MHz, CDCl<sub>3</sub>) δ: 7.32-7.66 (m, 12 H, Ph), 7.12-7.16 (m, 2H, Ph), 4.72 (s, 2H, CH<sub>2</sub>), 3.41 (s, 3H, CH<sub>3</sub>).

**<sup>13</sup>C NMR** (50 MHz, CDCl<sub>3</sub>) δ: 170.2, 14.7, 140.4, 134.3, 133.0, 130.4, 129.9, 128.8, 128.3, 127.9, 127.5, 127.2, 127.1, 75.8, 35.0.

**HRMS** (ESI), *m/z*: calcd. for C<sub>21</sub>H<sub>20</sub>NO<sub>2</sub><sup>+</sup>: 318.1489 [M + H]<sup>+</sup>; found: 318.1485.

***General procedure for the synthesis of N-(alkoxymethyl)amides***

To a solution of the starting *N*-alkoxy-*N*-methanamide (1.0 equiv) in dry 2-MeTHF (3 mL) PMDTA (1.6 equiv) was added. Then, *s*-BuLi (1.4 M in cyclohexane, 1.6 equiv) was added dropwise at -78 °C. After stirring for 2 hours at -78 °C, the reaction was quenched with sat. aqueous NH<sub>4</sub>Cl. The reaction mixture was allowed to reach room temperature and was exhaustively extracted with Et<sub>2</sub>O (3 x 10 mL). The combined organic extracts were dried over Na<sub>2</sub>SO<sub>4</sub> and the solvent was removed under reduced pressure. The final products were obtained after purification by column chromatography on silica gel.

## *N*-(alkoxymethyl)amides: Experimental procedures and characterization

### 2-(4-isobutylphenyl)-*N*-(methoxymethyl)propanamide (**2**)

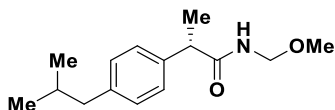

By following the general procedure, starting from *S*-(+)-2-(4-isobutylphenyl)-*N*-methoxy-*N*-methylpropanamide **1** (0.249 g, 1.0 mmol, 1.0 equiv), PMDTA (0.277 g, 0.33 mL, 1.6 mmol, 1.6 equiv) and *s*-BuLi (2.2 M in Et<sub>2</sub>O, 0.73 mL, 1.6 mmol, 1.6 equiv) in dry 2-MeTHF (3 mL), compound **2** was obtained in 81% yield (0.201 g – entry 6, Table 1 manuscript) as a colourless oil after purification by column chromatography on silica gel (*n*-hexane:EtOAc 7:3).

The corresponding racemic sample has been prepared starting from racemic 2-(4-isobutylphenyl)-*N*-methoxy-*N*-methylpropanamide and spectroscopic data match with those ones reported below.

**<sup>1</sup>H NMR** (400 MHz, Acetone-*d*<sub>6</sub>) δ: 7.73 (brs, 1H, NH), 7.27 (m, 2H, Ph H-2,6), 7.10 (m, 2H, Ph H-3,5), 4.55 (d of an AB system, <sup>2</sup>*J*<sub>AB</sub> = 10.2 Hz, <sup>3</sup>*J*<sub>H,NH</sub> = 6.8 Hz, 1H, CH<sub>2</sub>), 4.53 (d of an AB system, <sup>2</sup>*J*<sub>AB</sub> = 10.2 Hz, <sup>3</sup>*J*<sub>H,NH</sub> = 6.8 Hz, 1H, CH<sub>2</sub>), 3.64 (q, <sup>3</sup>*J* = 7.1 Hz, 1H, CHCH<sub>3</sub>), 3.12 (s, 3H, OCH<sub>3</sub>), 2.44 (d, *J* = 7.1 Hz, 2H, CH<sub>2</sub>CH(CH<sub>3</sub>)<sub>2</sub>), 1.84 (m, 1H, CH<sub>2</sub>CH(CH<sub>3</sub>)<sub>2</sub>), 1.40 (d, <sup>3</sup>*J* = 7.1 Hz, 3H, CHCH<sub>3</sub>), 0.88 (d, *J* = 6.6 Hz, 6H, CH<sub>2</sub>CH(CH<sub>3</sub>)<sub>2</sub>).

**<sup>13</sup>C NMR** (100 MHz, Acetone-*d*<sub>6</sub>) δ: 175.3 (C=O), 140.8 (Ph C-4), 140.5 (Ph C-1), 129.9 (Ph C-3,5), 128.1 (Ph C-2,6), 71.7 (CH<sub>2</sub>), 55.4 (OCH<sub>3</sub>), 47.0 (CHCH<sub>3</sub>), 45.6 (CH<sub>2</sub>CH(CH<sub>3</sub>)<sub>2</sub>), 31.0 (CH<sub>2</sub>CH(CH<sub>3</sub>)<sub>2</sub>), 22.60 (CH<sub>2</sub>CH(CH<sub>3</sub>)<sub>2</sub>), 22.59 (CH<sub>2</sub>CH(CH<sub>3</sub>)<sub>2</sub>), 19.2 (CHCH<sub>3</sub>).

**<sup>15</sup>N NMR** (40 MHz, Acetone-*d*<sub>6</sub>) δ: -260.6 (NH).

**HRMS** (ESI), *m/z*: calcd. for C<sub>15</sub>H<sub>23</sub>NNaO<sub>2</sub><sup>+</sup>: 272.1621 [M + Na]<sup>+</sup>; found: 272.1630.

**HPLC analysis**: Chiralpak IG Column, λ 254 nm, eluent: *n*-hexane / *i*-propanol 80:20. Flow 1 mL/min.

[α]<sub>D</sub><sup>25</sup> = + 13 (*c* = 1, CHCl<sub>3</sub>).

## Racemate

Datafile Name: MAL-318\_80HEX\_20IPA\_01.lcd  
Sample Name: MAL-318\_80HEX\_20IPA\_  
Sample ID: MAL-318\_80HEX\_20IPA\_

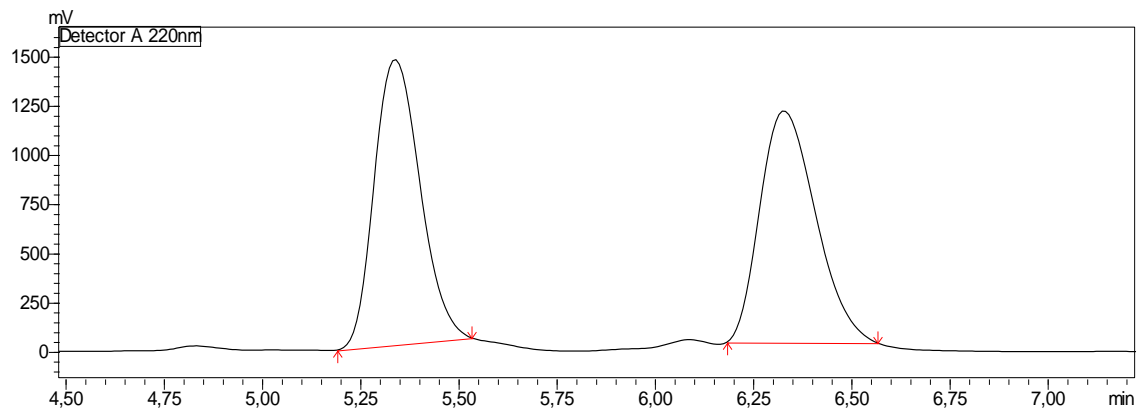

| Peaks | Retention time (min) | Area     | Area %  |
|-------|----------------------|----------|---------|
| 1     | 5,339                | 11766643 | 50,340  |
| 2     | 6,329                | 11607588 | 49,660  |
| Total |                      | 23374232 | 100,000 |

## Enantioenriched

Datafile Name: MAL-358\_80HEX\_20IPA\_01.lcd  
Sample Name: MAL-358\_80HEX\_20IPA\_  
Sample ID: MAL-358\_80HEX\_20IPA\_

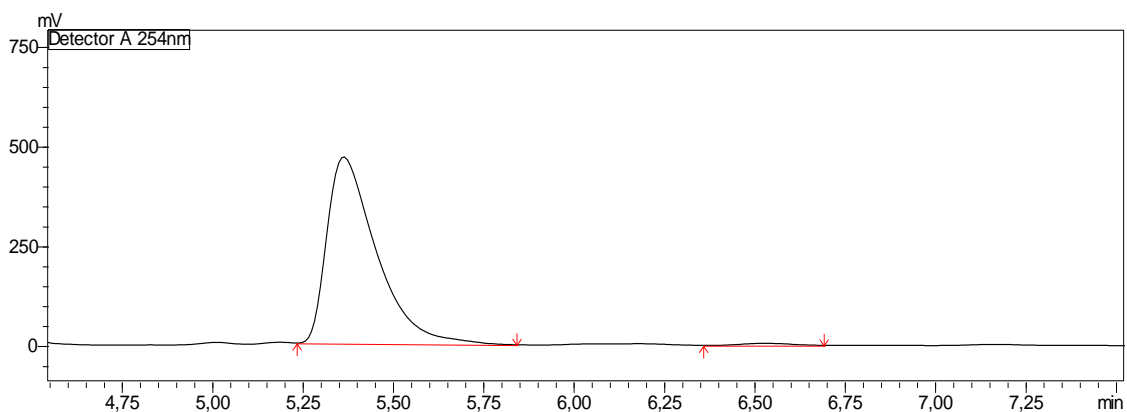

| Peaks | Retention time (min) | Area    | Area %  |
|-------|----------------------|---------|---------|
| 1     | 5,364                | 4458612 | 98,980  |
| 2     | 6,531                | 45931   | 1,020   |
| Total |                      | 4504543 | 100,000 |

## 2-(4-isobutylphenyl)-N-methylpropanamide (2a)

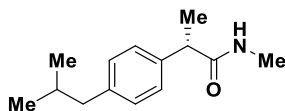

By following the general procedure, starting from *S*-(+)-2-(4-isobutylphenyl)-*N*-methoxy-*N*-methylpropanamide **1** (0.249 g, 1.0 mmol, 1.0 equiv), TMEDA (0.186 g, 0.24 mL, 1.6 mmol, 1.6 equiv) and *s*-BuLi (2.2 M in Et<sub>2</sub>O, 0.73 mL, 1.6 mmol, 1.6 equiv) in dry 2-MeTHF (3 mL), compound **2a**<sup>[10]</sup> was obtained in 11% yield (0.024 g – entry 5, Table 1 manuscript) as a white solid after purification by column chromatography on silica gel (*n*-hexane:EtOAc 7:3).

The corresponding racemic sample has been prepared starting from racemic *N*-methoxy-2-(6-methoxynaphthalen-2-yl)-*N*-methylpropanamide and spectroscopic data match with those ones reported below.

**mp** = 106 °C (lit.<sup>[10]</sup> 104-106 °C)

**<sup>1</sup>H NMR** (200 MHz, CDCl<sub>3</sub>) δ: 7.19 (m, 2H), 7.11 (m, 2H), 5.39 (brs, 1H), 3.53 (q, 1H), 2.73 (d, 3H), 2.45 (d, 2H), 1.85 (m, 1H), 1.51 (d, 3H), 0.90 (d, 6H).

**<sup>13</sup>C NMR** (100 MHz, CDCl<sub>3</sub>) δ: 175.1, 140.7, 138.5, 129.7, 129.6, 127.4, 46.7, 45.0, 30.1, 26.5, 22.4, 18.5.

**HRMS** (ESI), *m/z*: calcd. for C<sub>14</sub>H<sub>21</sub>NNaO<sup>+</sup>: 242.1521 [M + Na]<sup>+</sup>; found: 242.1526.

[α]<sub>D</sub><sup>25</sup> = + 40 (*c* = 1, EtOH).

## 2-(4-isobutylphenyl)-4-methylhexan-3-one (2b)

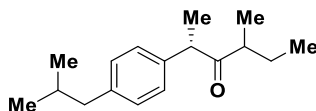

By following the general procedure, starting from *S*-(+)-2-(4-isobutylphenyl)-*N*-methoxy-*N*-methylpropanamide **1** (0.249 g, 1.0 mmol, 1.0 equiv), TMEDA (0.186 g, 0.24 mL, 1.6 mmol, 1.6 equiv) and *s*-BuLi (2.2 M in Et<sub>2</sub>O, 0.73 mL, 1.6 mmol, 1.6 equiv) in dry 2-MeTHF (3 mL), compound **2b** was obtained in 8% yield (0.020 g – entry 5, Table 1 manuscript) as a colourless oil after purification by column chromatography on silica gel (*n*-hexane:EtOAc 7:3).

The corresponding racemic sample has been prepared starting from racemic *N*-methoxy-2-(6-methoxynaphthalen-2-yl)-*N*-methylpropanamide and spectroscopic data match with those ones reported below.

**<sup>1</sup>H NMR** (400 MHz, CDCl<sub>3</sub>) δ: 7.10 (m, 4H), 3.83 (m, 1H), 2.55 (m, 1H), 2.44 (d, 2H), 1.83 (m, 1H), 1.59 (m, 1H), 1.37 (m, 3H), 1.25 (m, 1H), 1.03- 0.53 (m, 3H), 0.90 (d, 3H), 0.90-0.80 (m, 9H).

**<sup>13</sup>C NMR** (50 MHz, CDCl<sub>3</sub>) δ: 215.1, 214.4, 140.6, 137.8, 137.4, 129.6, 129.6, 128.0, 127.9, 52.3, 51.3, 46.3, 46.1, 45.1, 30.3, 27.0, 25.6, 22.5, 22.5, 22.4, 17.9, 17.9, 17.5, 16.3, 11.8, 11.7.

**HRMS** (ESI), *m/z*: calcd. for C<sub>17</sub>H<sub>26</sub>NaO<sup>+</sup>: 269.1881 [M + Na]<sup>+</sup>; found: 269.1885.

$[\alpha]_D^{25} = +76$  ( $c = 1$ , EtOH).

### ***N*-(methoxymethyl)-2-(6-methoxy-2-naphthyl)propenamide (3)**

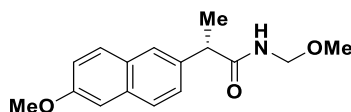

By following the general procedure, starting from (*S*)-(+)-*N*-methoxy-2-(6-methoxynaphthalen-2-yl)-*N*-methylpropanamide **1** (0.273 g, 1.0 mmol, 1.0 equiv), PMDTA (0.277 g, 0.33 mL, 1.6 mmol, 1.6 equiv) and *s*-BuLi (2.2 M in Et<sub>2</sub>O, 0.73 mL, 1.6 mmol, 1.6 equiv) in dry 2-MeTHF (3 mL), compound **3** was obtained in 70% yield (0.191 g) as a white solid after purification by column chromatography on silica gel (*n*-hexane:EtOAc 7:3).

The corresponding racemic sample has been prepared starting from racemic *N*-methoxy-2-(6-methoxynaphthalen-2-yl)-*N*-methylpropanamide and spectroscopic data match with those ones reported below.

**mp** = 70-75 °C (enantiomer); 83-86 °C (racemate)

**<sup>1</sup>H NMR** (400 MHz, Acetone-d<sub>6</sub>)  $\delta$ : 7.78 (m, 1H, NH), 7.75 (m, 3H, Naph H-1,4,8), 7.47 (dd, <sup>3</sup>*J* = 8.5 Hz, <sup>4</sup>*J* = 1.8 Hz, 1H, Naph H-3), 7.26 (d, <sup>4</sup>*J* = 2.6 Hz, 1H, Naph H-5), 7.13 (dd, <sup>3</sup>*J* = 9.0 Hz, <sup>4</sup>*J* = 2.6 Hz, 1H, Naph H-7), 4.56 (d of an AB-system, <sup>2</sup>*J*<sub>AB</sub> = 12.8 Hz, <sup>3</sup>*J* = 6.8 Hz, 1 H, CH<sub>2</sub>), 4.55 (d of an AB-system, <sup>2</sup>*J*<sub>AB</sub> = 12.8 Hz, <sup>3</sup>*J* = 6.8 Hz, 1 H, CH<sub>2</sub>), 3.90 (s, 3H, OCH<sub>3</sub>), 3.81 (q, <sup>3</sup>*J* = 7.1 Hz, 1H, CH), 3.12 (s, 3H, CH<sub>2</sub>OCH<sub>3</sub>), 1.49 (d, <sup>3</sup>*J* = 7.1 Hz, 3H, CHCH<sub>3</sub>).

**<sup>13</sup>C NMR** (100 MHz, Acetone-d<sub>6</sub>)  $\delta$ : 175.2 (C=O), 158.6 (Naph C-6), 138.3 (Naph C-2), 134.7 (Naph C-4a), 130.0 (Naph C-8), 129.9 (Naph C-8a), 127.9 (Naph C-4), 127.2 (Naph C-3), 126.8 (Naph C-1), 106.5 (Naph C-5), 71.8 (CH<sub>2</sub>), 55.6 (OCH<sub>3</sub>), 55.5 (CH<sub>2</sub>OCH<sub>3</sub>), 47.3 (CH), 19.2 (CHCH<sub>3</sub>).

**<sup>15</sup>N NMR** (40 MHz, Acetone-d<sub>6</sub>)  $\delta$ : -260.3 (NH).

**HRMS** (ESI), *m/z*: calcd. for C<sub>16</sub>H<sub>19</sub>NNaO<sub>3</sub><sup>+</sup>: 296.1257 [M + Na]<sup>+</sup>; found: 296.1259.

**HPLC analysis**: Chiralpak IG Column,  $\lambda$  254 nm, eluent: *n*-hexane / *i*-propanol 80:20. Flow 1 mL/min.

$[\alpha]_D^{25} = +21$  ( $c = 1$ , CHCl<sub>3</sub>).

#### ***Racemate***

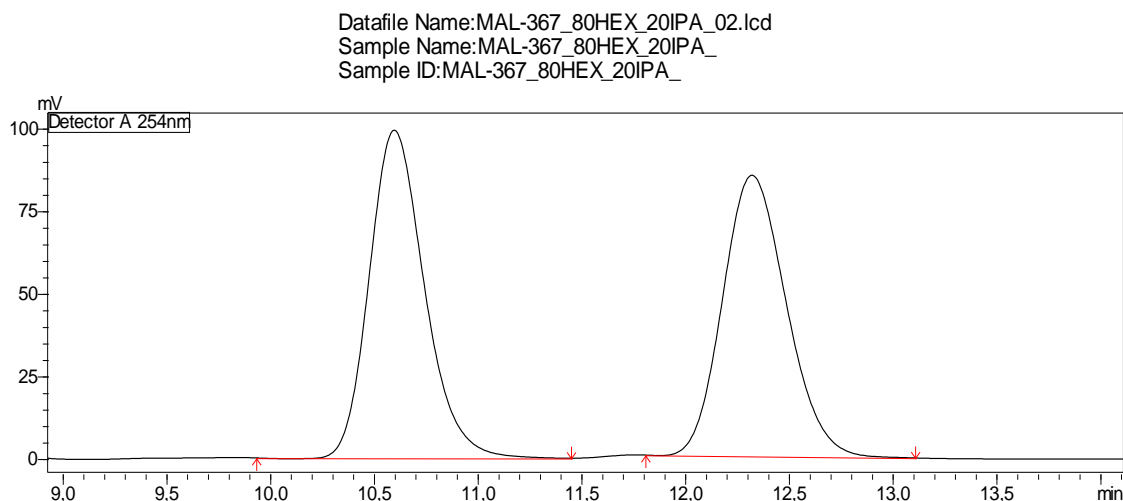

| Peaks | Retention time (min) | Area    | Area %  |
|-------|----------------------|---------|---------|
| 1     | 10,599               | 1827233 | 50,212  |
| 2     | 12,323               | 1811835 | 49,788  |
| Total |                      | 3639068 | 100,000 |

### Enantioenriched

Datafile Name: MAL-386\_80HEX\_20IPA\_01.lcd  
Sample Name: MAL-386\_80HEX\_20IPA\_  
Sample ID: MAL-386\_80HEX\_20IPA\_

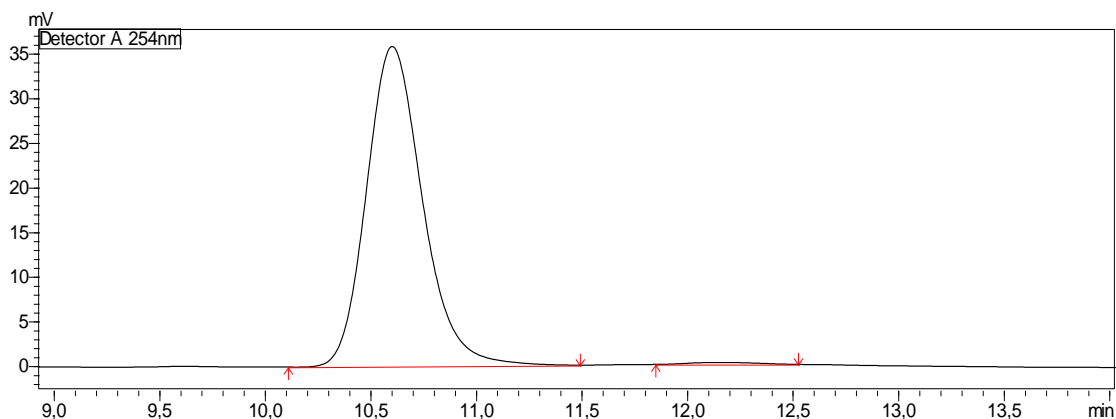

| Peaks | Retention time (min) | Area   | Area %  |
|-------|----------------------|--------|---------|
| 1     | 10,605               | 660713 | 99,255  |
| 2     | 12,144               | 4957   | 0,745   |
| Total |                      | 665670 | 100,000 |

### *N*-(methoxymethyl)-2-phenylpropanamide (**4**)

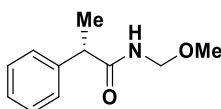

By following the general procedure, starting from (S)-(+)-*N*-methoxy-*N*-methyl-2-phenylpropanamide (0.193 g, 1.0 mmol, 1.0 equiv), PMDTA (0.277 g, 0.33 mL, 1.6 mmol, 1.6 equiv) and *s*-BuLi (2.2 M in Et<sub>2</sub>O, 0.73 mL, 1.6 mmol, 1.6 equiv) in dry 2-MeTHF (3 mL), compound **4** was obtained in 73% yield (0.164 g) as a colourless oil after purification by column chromatography on silica gel (*n*-hexane:EtOAc 6:4).

The corresponding racemic sample has been prepared starting from racemic *N*-methoxy-*N*-methyl-2-phenylpropanamide and spectroscopic data match with those ones reported below.

**<sup>1</sup>H NMR** (400 MHz, C<sub>6</sub>D<sub>6</sub>)  $\delta$ : 7.18 (m, 2H, Ph H-2,6), 7.11 (m, 2H, Ph H-3,5), 7.03 (m, 1H, Ph H-4), 5.63 (brs, 1H, NH), 4.38 (d,  $J$  = 6.7 Hz, 2H, CH<sub>2</sub>), 3.15 (q,  $^3J$  = 7.1 Hz, 1H, CH), 3.05 (s, 3H, OCH<sub>3</sub>), 1.44 (d,  $^3J$  = 7.1 Hz, 3H, CH<sub>3</sub>).

**<sup>13</sup>C NMR** (100 MHz, C<sub>6</sub>D<sub>6</sub>)  $\delta$ : 174.2 (C=O), 142.1 (Ph C-1), 129.0 (Ph C-3,5), 127.9 (Ph C-2,6), 127.3 (Ph C-4), 71.4 (CH<sub>2</sub>), 55.5 (OCH<sub>3</sub>), 47.4 (CH), 19.02 (CH<sub>3</sub>).

**<sup>15</sup>N NMR** (40 MHz, C<sub>6</sub>D<sub>6</sub>)  $\delta$ : -260.8 (NH).

**HRMS (ESI),  $m/z$ :** calcd. for  $C_{11}H_{15}NNaO_2^+$ : 216.0995  $[M + Na]^+$ ; found: 216.1005.

**HPLC analysis:** Chiralpak IG Column,  $\lambda$  254 nm, eluent: *n*-hexane / *i*-propanol 80:20. Flow 1 mL/min.

$[\alpha]_D^{25} = +49$  ( $c = 1$ ,  $CHCl_3$ ).

**Racemate**

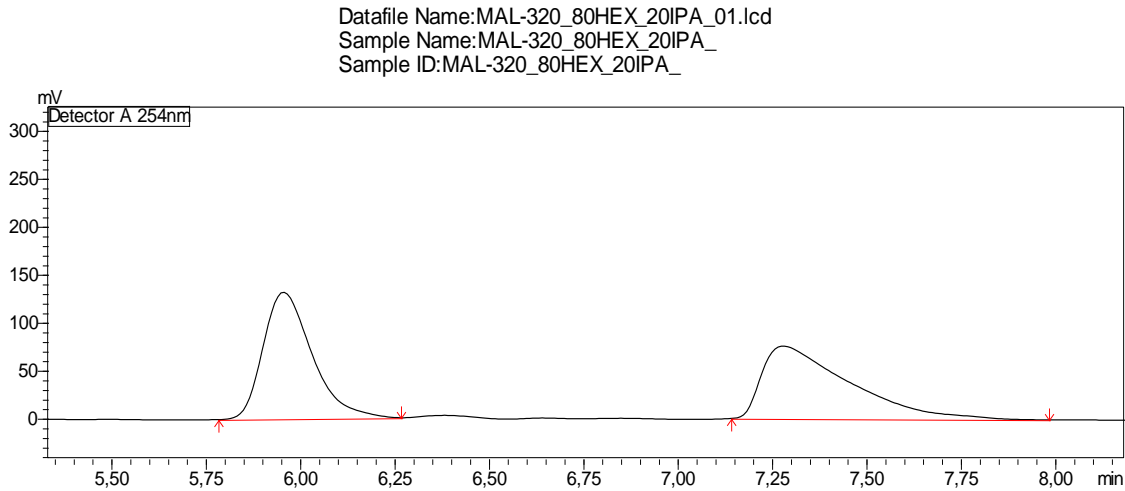

| Peaks | Retention time (min) | Area    | Area %  |
|-------|----------------------|---------|---------|
| 1     | 5,957                | 1189450 | 49,555  |
| 2     | 7,280                | 1210834 | 50,445  |
| Total |                      | 2400285 | 100,000 |

**Enantioenriched**

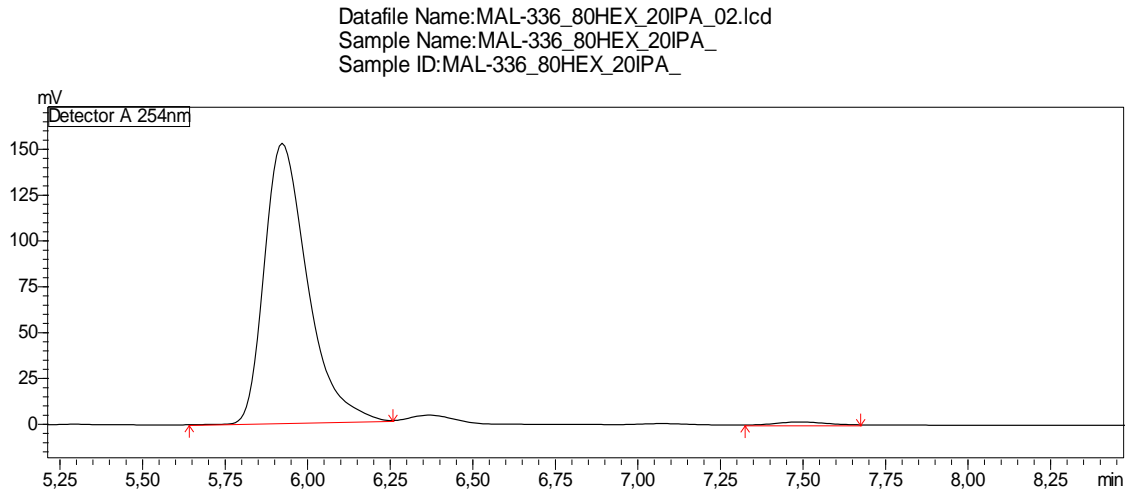

| Peaks | Retention time (min) | Area    | Area %  |
|-------|----------------------|---------|---------|
| 1     | 5,925                | 1383247 | 98,862  |
| 2     | 7,492                | 15916   | 1,138   |
| Total |                      | 1399163 | 100,000 |

#### ***N*-(methoxymethyl)-3-phenylpropanamide (5)**

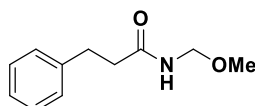

By following the general procedure, starting from *N*-methoxy-*N*-methyl-3-phenylpropanamide (0.193 g, 1.0 mmol, 1.0 equiv), PMDTA (0.277 g, 0.33 mL, 1.6 mmol, 1.6 equiv) and *s*-BuLi (2.2 M in Et<sub>2</sub>O, 0.73 mL, 1.6 mmol, 1.6 equiv) in dry 2-MeTHF (3 mL), compound **5** was obtained in 62% yield (0.120 g) as a colourless oil after purification by column chromatography on silica gel (*n*-hexane:EtOAc 5:5).

**<sup>1</sup>H NMR** (400 MHz, Acetone-*d*<sub>6</sub>) δ: 7.74 (brs, 1H, NH), 7.26 (m, 2H, Ph H-3,5), 7.24 (m, 2H, Ph H-2,6), 7.16 (m, 1H, Ph H-4), 4.56 (d, *J* = 6.8 Hz, 2H, CH<sub>2</sub>OCH<sub>3</sub>), 3.16 (s, 3H, OCH<sub>3</sub>), 2.92 (m, 2H, CH<sub>2</sub>CH<sub>2</sub>CO), 2.52 (m, 2H, CH<sub>2</sub>CH<sub>2</sub>CO).

**<sup>13</sup>C NMR** (100 MHz, Acetone-*d*<sub>6</sub>) δ: 173.0 (C=O), 142.4 (Ph C-1), 129.2 (Ph C-2,6), 129.15 (Ph C-3,5), 126.8 (Ph C-4), 71.6 (CH<sub>2</sub>OCH<sub>3</sub>), 55.5 (OCH<sub>3</sub>), 38.5 (CH<sub>2</sub>CH<sub>2</sub>CO), 32.0 (CH<sub>2</sub>CH<sub>2</sub>CO).

**<sup>15</sup>N NMR** (40 MHz, Acetone-*d*<sub>6</sub>) δ: -259.3 (NH).

**HRMS** (ESI), *m/z*: calcd. for C<sub>11</sub>H<sub>15</sub>NNaO<sub>2</sub><sup>+</sup>: 216.0995 [M + Na]<sup>+</sup>; found: 216.0999.

#### ***N*-(methoxymethyl)-2,2-dimethylpropanamide (6)**

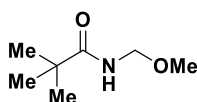

By following the general procedure, starting from *N*-methoxy-*N*-methylpivalamide (0.145 g, 1.0 mmol, 1.0 equiv), PMDTA (0.277 g, 0.33 mL, 1.6 mmol, 1.6 equiv) and *s*-BuLi (2.2 M in Et<sub>2</sub>O, 0.73 mL, 1.6 mmol, 1.6 equiv) in dry 2-MeTHF (3 mL), compound **6** was obtained in 79% yield (0.114 g) as a colourless oil after purification by column chromatography on silica gel (*n*-hexane:EtOAc 6:4).

**<sup>1</sup>H NMR** (400 MHz, Acetone-*d*<sub>6</sub>) δ: 7.57 (brs, 1H, NH), 4.57 (d, *J* = 6.7 Hz, 2H, CH<sub>2</sub>), 3.19 (s, 3H, OCH<sub>3</sub>), 1.18 (s, 9H, CH<sub>3</sub>).

**<sup>13</sup>C NMR** (100 MHz, Acetone-*d*<sub>6</sub>) δ: 179.1 (C=O), 71.9 (CH<sub>2</sub>), 55.4 (OCH<sub>3</sub>), 39.3 (C(CH<sub>3</sub>)<sub>3</sub>), 27.7 (CH<sub>3</sub>).

**<sup>15</sup>N NMR** (40 MHz, Acetone-*d*<sub>6</sub>) δ: -267.5 (NH).

**HRMS** (ESI), *m/z*: calcd. for C<sub>7</sub>H<sub>15</sub>NNaO<sub>2</sub><sup>+</sup>: 168.0995 [M + Na]<sup>+</sup>; found: 168.0997.

#### ***N*-(methoxymethyl)cyclopropanecarboxamide (7)**

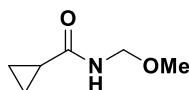

By following the general procedure, starting from *N*-methoxy-*N*-methylcyclopropanecarboxamide (0.129 g, 1.0 mmol, 1.0 equiv), PMDTA (0.277 g, 0.33 mL, 1.6 mmol, 1.6 equiv) and *s*-BuLi (2.2 M in Et<sub>2</sub>O, 0.73 mL, 1.6 mmol, 1.6 equiv) in dry 2-MeTHF (3 mL), compound **7** was obtained in 75% yield (0.097 g) as a colourless oil after purification by column chromatography on silica gel (*n*-hexane:EtOAc 6:4).

**<sup>1</sup>H NMR** (400 MHz, C<sub>6</sub>D<sub>6</sub>)  $\delta$ : 6.31 (brs, 1H, NH), 4.53 (d, *J* = 6.9 Hz, 2H, CH<sub>2</sub>), 3.16 (s, 3H, OCH<sub>3</sub>), 1.07 (m, 2H, cyclopropane H-2,3), 1.00 (m, 1H, cyclopropane H-1), 0.43 (m, 2H, cyclopropane H-2,3).

**<sup>13</sup>C NMR** (100 MHz, C<sub>6</sub>D<sub>6</sub>)  $\delta$ : 174.2 (C=O), 71.5 (CH<sub>2</sub>), 55.6 (OCH<sub>3</sub>), 14.6 (cyclopropane C-1), 7.5 (cyclopropane C-2,3).

**<sup>15</sup>N NMR** (40 MHz, C<sub>6</sub>D<sub>6</sub>)  $\delta$ : -259.9 (NH).

**HRMS** (ESI), *m/z*: calcd. for C<sub>6</sub>H<sub>11</sub>NNaO<sub>2</sub><sup>+</sup>: 152.0682 [M + Na]<sup>+</sup>; found: 152.0687.

#### ***N*-(methoxymethyl)cyclobutanecarboxamide (8)**

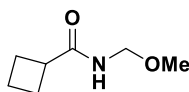

By following the general procedure, starting from *N*-methoxy-*N*-methylcyclobutanecarboxamide (0.143 g, 1.0 mmol, 1.0 equiv), PMDTA (0.277 g, 0.33 mL, 1.6 mmol, 1.6 equiv) and *s*-BuLi (2.2 M in Et<sub>2</sub>O, 0.73 mL, 1.6 mmol, 1.6 equiv) in dry 2-MeTHF (3 mL), compound **8** was obtained in 71% yield (0.101 g) as a colourless oil after purification by column chromatography on silica gel (*n*-hexane:EtOAc 6:4).

**<sup>1</sup>H NMR** (400 MHz, C<sub>6</sub>D<sub>6</sub>)  $\delta$ : 5.59 (brs, 1H, NH), 4.51 (d, *J* = 6.9 Hz, 2H, CH<sub>2</sub>), 3.16 (s, 3H, OCH<sub>3</sub>), 2.57 (m, 1H, cyclobutane H-1), 2.29 (m, 2H, cyclobutane H-2,4), 1.88 (m, 2H, cyclobutane H-2,4), 1.71 (m, 2H, cyclobutane H-3).

**<sup>13</sup>C NMR** (100 MHz, C<sub>6</sub>D<sub>6</sub>)  $\delta$ : 175.0 (C=O), 71.3 (CH<sub>2</sub>), 55.6 (OCH<sub>3</sub>), 40.0 (cyclobutane C-1), 25.4 (cyclobutane C-2,4), 18.6 (cyclobutane C-3).

**<sup>15</sup>N NMR** (40 MHz, C<sub>6</sub>D<sub>6</sub>)  $\delta$ : -263.9 (NH).

**HRMS** (ESI), *m/z*: calcd. for C<sub>7</sub>H<sub>13</sub>NNaO<sub>2</sub><sup>+</sup>: 166.0838 [M + Na]<sup>+</sup>; found: 166.0847.

#### ***N*-(methoxymethyl)cyclopentanecarboxamide (9)**

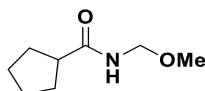

By following the general procedure, starting from *N*-methoxy-*N*-methylcyclopentanecarboxamide (0.157 g, 1.0 mmol, 1.0 equiv), PMDTA (0.277 g, 0.33 mL, 1.6 mmol, 1.6 equiv) and *s*-BuLi (2.2 M in Et<sub>2</sub>O, 0.73 mL, 1.6 mmol, 1.6 equiv) in dry 2-MeTHF (3 mL), compound **9** was obtained in 74% yield (0.116 g) as a white solid after purification by column chromatography on silica gel (*n*-hexane:EtOAc 6:4).

**mp** = 35-40 °C

**<sup>1</sup>H NMR** (400 MHz, C<sub>6</sub>D<sub>6</sub>) δ: 5.96 (brs, 1H, NH), 4.54 (d, *J* = 6.9 Hz, 2H, CH<sub>2</sub>), 3.18 (s, 3H, OCH<sub>3</sub>), 2.18 (m, 1H, cyclopentane H-1), 1.85 (m, 2H, cyclopentane H-2,5), 1.64 (m, 4H, cyclopentane H-2,3,4,5), 1.39 (m, 2H, cyclopentane C-3,4).

**<sup>13</sup>C NMR** (100 MHz, C<sub>6</sub>D<sub>6</sub>) δ: 176.5 (C=O), 71.4 (CH<sub>2</sub>), 55.6 (OCH<sub>3</sub>), 45.8 (cyclopentane C-1), 30.6 (cyclopentane C-2,5), 26.3 (cyclopentane C-3,4).

**<sup>15</sup>N NMR** (40 MHz, C<sub>6</sub>D<sub>6</sub>) δ: -261.4 (NH).

**HRMS** (ESI), *m/z*: calcd. for C<sub>8</sub>H<sub>15</sub>NNaO<sub>2</sub><sup>+</sup>: 180.0995 [M + Na]<sup>+</sup>; found: 180.0998.

#### ***N*-(methoxymethyl)cyclohexanecarboxamide (10)**

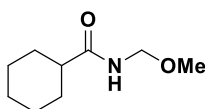

By following the general procedure, starting from *N*-methoxy-*N*-methylcyclohexanecarboxamide (0.171 g, 1.0 mmol, 1.0 equiv), PMDTA (0.277 g, 0.33 mL, 1.6 mmol, 1.6 equiv) and *s*-BuLi (2.2 M in Et<sub>2</sub>O, 0.73 mL, 1.6 mmol, 1.6 equiv) in dry 2-MeTHF (3 mL), compound **10** was obtained in 68% yield (0.116 g) as a white solid after purification by column chromatography on silica gel (*n*-hexane:EtOAc 6:4).

**mp** = 69-71 °C

**<sup>1</sup>H NMR** (400 MHz, C<sub>6</sub>D<sub>6</sub>) δ: 5.42 (brs, 1H, NH), 4.54 (d, *J* = 6.9 Hz, 2H, CH<sub>2</sub>), 3.18 (s, 3H, OCH<sub>3</sub>), 1.66 (m, 3H, cyclohexane H-1, 2,6), 1.61 (m, 2H, cyclohexane H-3,5), 1.49 (m, 2H, cyclohexane H-4), 1.47 (m, 2H, cyclohexane H-2,6), 1.06 (m, 2H, cyclohexane H-3,5).

**<sup>13</sup>C NMR** (100 MHz, C<sub>6</sub>D<sub>6</sub>) δ: 175.9 (C=O), 71.2 (CH<sub>2</sub>), 55.6 (OCH<sub>3</sub>), 45.5 (cyclohexane C-1), 29.8 (cyclohexane C-2,6), 26.1 (cyclohexane C-4), 26.0 (cyclohexane C-3,5).

**<sup>15</sup>N NMR** (40 MHz, C<sub>6</sub>D<sub>6</sub>) δ: -263.5 (NH).

**HRMS** (ESI), *m/z*: calcd. for C<sub>9</sub>H<sub>17</sub>NNaO<sub>2</sub><sup>+</sup>: 194.1151 [M + Na]<sup>+</sup>; found: 194.1152.

#### ***N*-(methoxymethyl)-1-adamantanecarboxamide (11)**

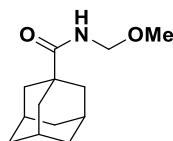

By following the general procedure, starting from *N*-methoxy-*N*-methyladamantane-1-carboxamide (0.223 g, 1.0 mmol, 1.0 equiv), PMDTA (0.277 g, 0.33 mL, 1.6 mmol, 1.6 equiv) and *s*-BuLi (2.2 M in Et<sub>2</sub>O, 0.73 mL,

1.6 mmol, 1.6 equiv) in dry 2-MeTHF (3 mL), compound **11** was obtained in 70% yield (0.156 g) as a white solid after purification by column chromatography on silica gel (*n*-hexane:EtOAc 7:3).

**mp** = 110 °C

**<sup>1</sup>H NMR** (400 MHz, C<sub>6</sub>D<sub>6</sub>) δ: 5.60 (brs, 1H, NH), 4.62 (d, *J* = 6.8 Hz, 2H, CH<sub>2</sub>), 3.21 (s, 3H, OCH<sub>3</sub>), 1.81 (m, 3H, Adamantane H-3,5,7), 1.70 (m, 6H, Adamantane H-2,8,9), 1.53 (m, 6H, Adamantane H-4,6,10).

**<sup>13</sup>C NMR** (100 MHz, C<sub>6</sub>D<sub>6</sub>) δ: 177.5 (C=O), 71.3 (CH<sub>2</sub>), 55.6 (OCH<sub>3</sub>), 40.9 (Adamantane C-1), 39.3 (Adamantane C-2,8,9), 36.7 (Adamantane C-4,6,10), 28.5 (Adamantane C-3,5,7).

**<sup>15</sup>N NMR** (40 MHz, C<sub>6</sub>D<sub>6</sub>) δ: -269.4 (NH).

**HRMS** (ESI), *m/z*: calcd. for C<sub>13</sub>H<sub>21</sub>NNaO<sub>2</sub><sup>+</sup>: 246.1464 [M + Na]<sup>+</sup>; found: 246.1471.

### ***N*-(methoxymethyl)benzamide (12)**

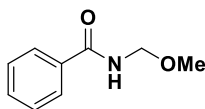

By following the general procedure, starting from *N*-methoxy-*N*-methylbenzamide (0.165 g, 1.0 mmol, 1.0 equiv), PMDTA (0.277 g, 0.33 mL, 1.6 mmol, 1.6 equiv) and *s*-BuLi (2.2 M in Et<sub>2</sub>O, 0.73 mL, 1.6 mmol, 1.6 equiv) in dry 2-MeTHF (3 mL), compound **12** was obtained in 61% yield (0.101 g) as a colourless oil after purification by column chromatography on silica gel (*n*-hexane:EtOAc 7:3).

**<sup>1</sup>H NMR** (400 MHz, Acetone-*d*<sub>6</sub>) δ: 8.48 (brs, 1H, NH), 7.95 (m, 2H, Ph H-2,6), 7.55 (m, 1H, Ph H-4), 7.48 (m, 2H, Ph H-3,5), 4.80 (d, *J* = 6.6 Hz, 2H, CH<sub>2</sub>), 3.30 (s, 3H, OCH<sub>3</sub>).

**<sup>13</sup>C NMR** (100 MHz, Acetone-*d*<sub>6</sub>) δ: 168.0 (C=O), 135.4 (Ph C-1), 132.4 (Ph C-4), 129.3 (Ph C-3,5), 128.2 (Ph C-2,6), 72.3 (CH<sub>2</sub>), 55.8 (CH<sub>3</sub>).

**HRMS** (ESI), *m/z*: calcd. for C<sub>9</sub>H<sub>11</sub>NNaO<sub>2</sub><sup>+</sup>: 188.0682 [M + Na]<sup>+</sup>; found: 188.0680.

### ***N*-(methoxymethyl)-4-methylbenzamide (13)**

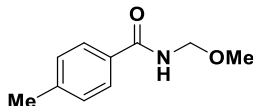

By following the general procedure, starting from *N*-methoxy-*N*,4-dimethylbenzamide (0.179 g, 1.0 mmol, 1.0 equiv), PMDTA (0.277 g, 0.33 mL, 1.6 mmol, 1.6 equiv) and *s*-BuLi (2.2 M in Et<sub>2</sub>O, 0.73 mL, 1.6 mmol, 1.6 equiv) in dry 2-MeTHF (3 mL), compound **13** was obtained in 68% yield (0.121 g) as a white solid after purification by column chromatography on silica gel (*n*-hexane:EtOAc 7:3).

**mp** = 72-74 °C

**<sup>1</sup>H NMR** (400 MHz, C<sub>6</sub>D<sub>6</sub>) δ: 7.59 (m, 2H, Ph H-2,6), 6.87 (m, 2H, Ph H-3,5), 6.29 (brs, 1H, NH), 4.72 (d, *J* = 6.8 Hz, 2H, CH<sub>2</sub>), 3.22 (s, 3H, OCH<sub>3</sub>), 2.01 (s, 3H, CH<sub>3</sub>).

**<sup>13</sup>C NMR** (100 MHz, C<sub>6</sub>D<sub>6</sub>) δ: 167.2 (C=O), 141.9 (Ph C-4), 131.9 (Ph C-1), 129.3 (Ph C-3,5), 127.7 (Ph C-2,6), 71.8 (CH<sub>2</sub>), 55.9 (OCH<sub>3</sub>), 21.2 (CH<sub>3</sub>).

**HRMS** (ESI), *m/z*: calcd. for C<sub>10</sub>H<sub>13</sub>NNaO<sub>2</sub><sup>+</sup>: 202.0838 [M + Na]<sup>+</sup>; found: 202.0838.

#### ***N*-(methoxymethyl)-3-methylbenzamide (14)**

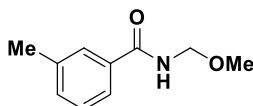

By following the general procedure, starting from *N*-methoxy-*N*,3-dimethylbenzamide (0.179 g, 1.0 mmol, 1.0 equiv), PMDTA (0.277 g, 0.33 mL, 1.6 mmol, 1.6 equiv) and *s*-BuLi (2.2 M in Et<sub>2</sub>O, 0.73 mL, 1.6 mmol, 1.6 equiv) in dry 2-MeTHF (3 mL), compound **14** was obtained in 66% yield (0.118 g) as a colourless oil after purification by column chromatography on silica gel (*n*-hexane:EtOAc 7:3).

**<sup>1</sup>H NMR** (400 MHz, Acetone-*d*<sub>6</sub>) δ: 8.42 (brs, 1H, NH), 7.76 (m, 1H, Ph H-2), 7.73 (m, 1H, Ph H-6), 7.36 (m, 2H, Ph H-4,5), 4.79 (d, 2H, CH<sub>2</sub>), 3.30 (s, 3H, OCH<sub>3</sub>), 2.38 (s, 3H, CH<sub>3</sub>).

**<sup>13</sup>C NMR** (100 MHz, Acetone-*d*<sub>6</sub>) δ: 168.1 (C=O), 138.9 (Ph C-3), 135.4 (Ph C-1), 133.0 (Ph C-4), 129.2 (Ph C-5), 128.8 (Ph C-2), 125.3 (Ph C-6), 72.2 (CH<sub>2</sub>), 55.8 (OCH<sub>3</sub>), 21.3 (CH<sub>3</sub>).

**<sup>15</sup>N NMR** (40 MHz, Acetone-*d*<sub>6</sub>) δ: -265.9 (NH).

**HRMS** (ESI), *m/z*: calcd. for C<sub>10</sub>H<sub>13</sub>NNaO<sub>2</sub><sup>+</sup>: 202.0838 [M + Na]<sup>+</sup>; found: 202.0841.

#### **2-ethyl-*N*-(methoxymethyl)benzamide (15)**

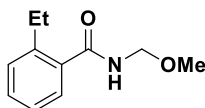

By following the general procedure, starting from 2-ethyl-*N*-methoxy-*N*-methylbenzamide (0.193 g, 1.0 mmol, 1.0 equiv), PMDTA (0.277 g, 0.33 mL, 1.6 mmol, 1.6 equiv) and *s*-BuLi (2.2 M in Et<sub>2</sub>O, 0.73 mL, 1.6 mmol, 1.6 equiv) in dry 2-MeTHF (3 mL), compound **15** was obtained in 63% yield (0.121 g) as a colourless oil after purification by column chromatography on silica gel (*n*-hexane:EtOAc 7:3).

**<sup>1</sup>H NMR** (400 MHz, CDCl<sub>3</sub>) δ: 7.37 (m, 1H, Ph H-6), 7.36 (m, 1H, Ph H-4), 7.28 (m, 1H, Ph H-3), 7.21 (m, 1H, Ph H-5), 6.43 (brs, 1H, NH), 4.86 (d, *J* = 6.9 Hz, 2H, CH<sub>2</sub>), 3.43 (s, 3H, OCH<sub>3</sub>), 2.82 (q, <sup>3</sup>*J* = 7.5 Hz, 2H, CH<sub>2</sub>CH<sub>3</sub>), 1.25 (t, <sup>3</sup>*J* = 7.5 Hz, 3H, CH<sub>2</sub>CH<sub>3</sub>).

**<sup>13</sup>C NMR** (100 MHz, CDCl<sub>3</sub>) δ: 170.7 (C=O), 142.6 (Ph C-2), 135.5 (Ph C-1), 130.4 (Ph C-6), 129.6 (Ph C-3), 126.5 (Ph C-4), 125.8 (Ph C-5), 71.6 (CH<sub>2</sub>), 56.2 (OCH<sub>3</sub>), 26.3 (CH<sub>2</sub>CH<sub>3</sub>), 15.9 (CH<sub>2</sub>CH<sub>3</sub>).

**HRMS** (ESI), *m/z*: calcd. for C<sub>11</sub>H<sub>15</sub>NNaO<sub>2</sub><sup>+</sup>: 216.0995 [M + Na]<sup>+</sup>; found: 216.0993.

### ***N*-(methoxymethyl)-4-(2-methyl-2-propanyl)benzamide (16)**

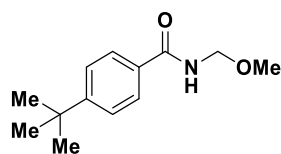

By following the general procedure, starting from 4-(*tert*-butyl)-*N*-methoxy-*N*-methylbenzamide (0.221 g, 1.0 mmol, 1.0 equiv), PMDTA (0.277 g, 0.33 mL, 1.6 mmol, 1.6 equiv) and *s*-BuLi (2.2 M in Et<sub>2</sub>O, 0.73 mL, 1.6 mmol, 1.6 equiv) in dry 2-MeTHF (3 mL), compound **16** was obtained in 77% yield (0.170 g) as a colourless oil after purification by column chromatography on silica gel (*n*-hexane:EtOAc 7:3).

**<sup>1</sup>H NMR** (400 MHz, Acetone-*d*<sub>6</sub>)  $\delta$ : 8.41 (brs, 1H, NH), 7.89 (m, 2H, Ph H-2,6), 7.52 (m, 2H, Ph H-3,5), 4.79 (d, *J* = 6.7 Hz, 2H, CH<sub>2</sub>), 3.29 (s, 3H, OCH<sub>3</sub>), 1.33 (s, 9H, CH<sub>3</sub>).

**<sup>13</sup>C NMR** (100 MHz, Acetone-*d*<sub>6</sub>)  $\delta$ : 167.8 (C=O), 155.6 (Ph C-4), 132.6 (Ph C-1), 128.1 (Ph C-2,6), 126.1 (Ph C-3,5), 72.2 (CH<sub>2</sub>), 55.8 (OCH<sub>3</sub>), 35.4 (C(CH<sub>3</sub>)<sub>3</sub>), 31.4 (CH<sub>3</sub>).

**<sup>15</sup>N NMR** (40 MHz, Acetone-*d*<sub>6</sub>)  $\delta$ : -265.9 (NH).

**HRMS** (ESI), *m/z*: calcd. for C<sub>13</sub>H<sub>19</sub>NNaO<sub>2</sub><sup>+</sup>: 244.1308 [M + Na]<sup>+</sup>; found: 244.1312.

### **4-methoxy-*N*-(methoxymethyl)benzamide (17)**

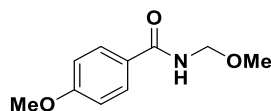

By following the general procedure, starting from *N*,4-dimethoxy-*N*-methylbenzamide (0.195 g, 1.0 mmol, 1.0 equiv), PMDTA (0.277 g, 0.33 mL, 1.6 mmol, 1.6 equiv) and *s*-BuLi (2.2 M in Et<sub>2</sub>O, 0.73 mL, 1.6 mmol, 1.6 equiv) in dry 2-MeTHF (3 mL), compound **17** was obtained in 74% yield (0.144 g) as a white solid after purification by column chromatography on silica gel (*n*-hexane:EtOAc 6:4).

**mp** = 59-62 °C

**<sup>1</sup>H NMR** (400 MHz, Acetone-*d*<sub>6</sub>)  $\delta$ : 8.37 (brs, 1H, NH), 7.93 (m, 2H, H-2,6), 7.00 (m, 2H, H-3,5), 4.78 (d, *J* = 6.7 Hz, 2H, CH<sub>2</sub>), 3.29 (s, 3H, CH<sub>2</sub>OCH<sub>3</sub>), 3.85 (s, 3H, OCH<sub>3</sub>).

**<sup>13</sup>C NMR** (100 MHz, Acetone-*d*<sub>6</sub>)  $\delta$ : 167.5 (C=O), 163.3 (Ph C-4), 130.0 (Ph C-2,6), 127.5 (Ph C-1), 114.4 (Ph C-3,5), 72.2 (CH<sub>2</sub>), 55.79 (OCH<sub>3</sub>), 55.74 (CH<sub>2</sub>OCH<sub>3</sub>).

**<sup>15</sup>N NMR** (40 MHz, Acetone-*d*<sub>6</sub>)  $\delta$ : -266.9 (NH).

**HRMS** (ESI), *m/z*: calcd. for C<sub>10</sub>H<sub>13</sub>NNaO<sub>3</sub><sup>+</sup>: 218.0788 [M + Na]<sup>+</sup>; found: 218.0779.

### **3-methoxy-*N*-(methoxymethyl)benzamide (18)**

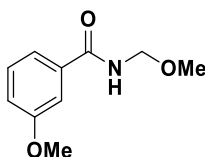

By following the general procedure, starting from *N*,3-dimethoxy-*N*-methylbenzamide (0.195 g, 1.0 mmol, 1.0 equiv), PMDTA (0.277 g, 0.33 mL, 1.6 mmol, 1.6 equiv) and *s*-BuLi (2.2 M in Et<sub>2</sub>O, 0.73 mL, 1.6 mmol, 1.6 equiv) in dry 2-MeTHF (3 mL), compound **18** was obtained in 67% yield (0.130 g) as a colourless oil after purification by column chromatography on silica gel (*n*-hexane:EtOAc 6:4).

**<sup>1</sup>H NMR** (400 MHz, CDCl<sub>3</sub>) δ: 7.39 (m, 1H, Ph H-2), 7.36 (m, 1H, Ph H-5), 7.31 (m, 1H, Ph H-6), 7.07 (ddd, <sup>3</sup>*J* = 7.8 Hz, <sup>4</sup>*J* = 2.6 Hz, <sup>5</sup>*J* = 1.4 Hz, 1H, Ph H-4), 6.77 (brs, 1H, NH), 4.90 (d, *J* = 6.8 Hz, 2H, CH<sub>2</sub>), 3.85 (s, 3H, OCH<sub>3</sub>), 3.41 (s, 3H, CH<sub>2</sub>OCH<sub>3</sub>).

**<sup>13</sup>C NMR** (100 MHz, CDCl<sub>3</sub>) δ: 167.8 (C=O), 159.9 (Ph C-3), 135.3 (Ph C-1), 129.7 (Ph C-5), 118.7 (Ph C-6), 118.2 (Ph C-4), 112.4 (Ph C-2), 71.9 (CH<sub>2</sub>), 56.2 (CH<sub>2</sub>OCH<sub>3</sub>), 55.5 (OCH<sub>3</sub>).

**HRMS** (ESI), *m/z*: calcd. for C<sub>10</sub>H<sub>13</sub>NNaO<sub>3</sub><sup>+</sup>: 218.0788 [*M* + Na]<sup>+</sup>; found: 218.0788.

### 3-methoxy-*N*-(methoxymethyl)-2-methylbenzamide (**19**)

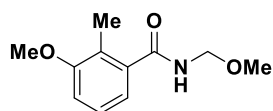

By following the general procedure, starting from *N*,3-dimethoxy-*N*,2-dimethylbenzamide (0.209 g, 1.0 mmol, 1.0 equiv), PMDTA (0.277 g, 0.33 mL, 1.6 mmol, 1.6 equiv) and *s*-BuLi (2.2 M in Et<sub>2</sub>O, 0.73 mL, 1.6 mmol, 1.6 equiv) in dry 2-MeTHF (3 mL), compound **19** was obtained in 65% yield (0.135 g) as a pale yellow solid after purification by column chromatography on silica gel (*n*-hexane:EtOAc 6:4).

**mp** = 32-35 °C

**<sup>1</sup>H NMR** (400 MHz, Acetone-d<sub>6</sub>) δ: 8.03 (brs, 1H, NH), 7.20 (m, 1H, Ph H-5), 7.00 (m, 1H, Ph H-4), 6.92 (m, 1H, Ph H-6), 4.76 (d, *J* = 6.8 Hz, 2H, CH<sub>2</sub>), 3.85 (s, 3H, OCH<sub>3</sub>), 3.34 (s, 3H, CH<sub>2</sub>OCH<sub>3</sub>), 2.23 (s, 3H, CH<sub>3</sub>).

**<sup>13</sup>C NMR** (100 MHz, Acetone-d<sub>6</sub>) δ: 170.8 (C=O), 139.5 (Ph C-1), 158.8 (Ph C-3), 127.3 (Ph C-5), 124.9 (Ph C-2), 119.6 (Ph C-6), 112.1 (Ph C-4), 71.9 (CH<sub>2</sub>), 56.0 (OCH<sub>3</sub>), 55.9 (CH<sub>2</sub>OCH<sub>3</sub>), 12.7 (CH<sub>3</sub>).

**<sup>15</sup>N NMR** (40 MHz, Acetone-d<sub>6</sub>) δ: -256.3 (NH).

**HRMS** (ESI), *m/z*: calcd. for C<sub>11</sub>H<sub>15</sub>NNaO<sub>3</sub><sup>+</sup>: 232.0944 [*M* + Na]<sup>+</sup>; found: 232.0933.

### (*N*-methoxymethyl)-4-(methylsulfanyl)benzamide (**20**)

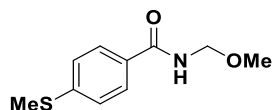

By following the general procedure, starting from *N*-methoxy-*N*-methyl-4-(methylthio)benzamide (0.211 g, 1.0 mmol, 1.0 equiv), PMDTA (0.277 g, 0.33 mL, 1.6 mmol, 1.6 equiv) and *s*-BuLi (2.2 M in Et<sub>2</sub>O, 0.73 mL, 1.6 mmol, 1.6 equiv) in dry 2-MeTHF (3 mL), compound **20** was obtained in 72% yield (0.152 g) as a pale yellow solid after purification by column chromatography on silica gel (*n*-hexane:EtOAc 6:4).

**mp** = 87-90 °C

**<sup>1</sup>H NMR** (400 MHz, Acetone-*d*<sub>6</sub>) δ: 8.42 (brs, 1H, NH), 7.88 (m, 2H, Ph H-2,6), 7.34 (m, 2H, Ph H-3,5), 4.79 (d, *J* = 6.6 Hz, 2H, CH<sub>2</sub>), 3.29 (s, 3H, OCH<sub>3</sub>), 2.54 (s, 3H, SCH<sub>3</sub>).

**<sup>13</sup>C NMR** (100 MHz, Acetone-*d*<sub>6</sub>) δ: 167.4 (C=O), 144.5 (Ph C-4), 131.4 (Ph C-1), 128.7 (Ph C-2,6), 125.9 (Ph C-3,5), 72.3 (CH<sub>2</sub>), 55.8 (OCH<sub>3</sub>), 14.7 (SCH<sub>3</sub>).

**<sup>15</sup>N NMR** (40 MHz, Acetone-*d*<sub>6</sub>) δ: -266.2 (NH).

**HRMS** (ESI), *m/z*: calcd. for C<sub>10</sub>H<sub>13</sub>NNaO<sub>2</sub>S<sup>+</sup>: 234.0559 [M + Na]<sup>+</sup>; found: 234.0562.

### 2-chloro-*N*-(methoxymethyl)benzamide (**21**)

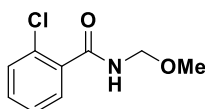

By following the general procedure, starting from 2-chloro-*N*-methoxy-*N*-methylbenzamide (0.199 g, 1.0 mmol, 1.0 equiv), PMDTA (0.277 g, 0.33 mL, 1.6 mmol, 1.6 equiv) and *s*-BuLi (2.2 M in Et<sub>2</sub>O, 0.73 mL, 1.6 mmol, 1.6 equiv) in dry 2-MeTHF (3 mL), compound **21** was obtained in 77% yield (0.153 g) as a white solid after purification by column chromatography on silica gel (*n*-hexane:EtOAc 7:3).

**mp** = 65-67 °C

**<sup>1</sup>H NMR** (400 MHz, Acetone-*d*<sub>6</sub>) δ: 8.21 (brs, 1H, NH), 7.52 (m, 1H, Ph H-6), 7.47 (m, 1H, Ph H-4), 7.46 (m, 1H, Ph H-3), 7.39 (m, 1H, Ph H-5), 4.79 (d, *J* = 6.7 Hz, 2H, CH<sub>2</sub>), 3.36 (s, 3H, OCH<sub>3</sub>).

**<sup>13</sup>C NMR** (100 MHz, Acetone-*d*<sub>6</sub>) δ: 168.0 (C=O), 137.7 (Ph C-2), 131.8 (Ph C-4), 131.2 (Ph C-1), 130.7 (Ph C-3), 129.9 (Ph C-6), 127.9 (Ph C-5), 71.9 (CH<sub>2</sub>), 56.0 (OCH<sub>3</sub>).

**<sup>15</sup>N NMR** (40 MHz, Acetone-*d*<sub>6</sub>) δ: -255.7 (NH).

**HRMS** (ESI), *m/z*: calcd. for C<sub>9</sub>H<sub>10</sub>ClNNaO<sub>2</sub><sup>+</sup>: 222.0292 [M + Na]<sup>+</sup>; found: 222.0291.

### 3-chloro-*N*-(methoxymethyl)benzamide (**22**)

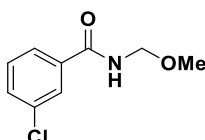

By following the general procedure, starting from 3-chloro-*N*-methoxy-*N*-methylbenzamide (0.199 g, 1.0 mmol, 1.0 equiv), PMDTA (0.277 g, 0.33 mL, 1.6 mmol, 1.6 equiv) and *s*-BuLi (2.2 M in Et<sub>2</sub>O, 0.73 mL, 1.6 mmol, 1.6 equiv) in dry 2-MeTHF (3 mL), compound **22** was obtained in 76% yield (0.151 g) as a colourless oil after purification by column chromatography on silica gel (*n*-hexane:EtOAc 7:3).

**<sup>1</sup>H NMR** (400 MHz, C<sub>6</sub>D<sub>6</sub>) δ: 7.58 (m, 1H, Ph H-2), 7.39 (m, 1H, Ph H-6), 7.05 (m, 1H, Ph H-4), 6.71 (m, 1H, Ph H-5), 6.04 (brs, 1H, NH), 4.60 (d, *J* = 6.8 Hz, 2H, CH<sub>2</sub>), 3.16 (s, 3H, OCH<sub>3</sub>).

**<sup>13</sup>C NMR** (100 MHz, C<sub>6</sub>D<sub>6</sub>)  $\delta$ : 166.0 (C=O), 136.4 (Ph C-1), 134.7 (Ph C-3), 131.6 (Ph C-4), 130.0 (Ph C-5), 127.5 (Ph C-2), 125.9 (Ph C-6), 71.8 (CH<sub>2</sub>), 56.0 (OCH<sub>3</sub>).

**HRMS** (ESI),  $m/z$ : calcd. for C<sub>9</sub>H<sub>10</sub>ClNNaO<sub>2</sub><sup>+</sup>: 222.0292 [M + Na]<sup>+</sup>; found: 222.0289.

#### 4-chloro-*N*-(methoxymethyl)benzamide (**23**)

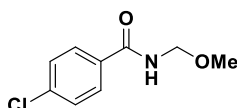

By following the general procedure, starting from 4-chloro-*N*-methoxy-*N*-methylbenzamide (0.199 g, 1.0 mmol, 1.0 equiv), PMDTA (0.277 g, 0.33 mL, 1.6 mmol, 1.6 equiv) and *s*-BuLi (2.2 M in Et<sub>2</sub>O, 0.73 mL, 1.6 mmol, 1.6 equiv) in dry 2-MeTHF (3 mL), compound **23** was obtained in 79% yield (0.157 g) as a yellow solid after purification by column chromatography on silica gel (*n*-hexane:EtOAc 7:3).

*Scale up of the reaction using 20 mmol of starting material.*

By following the general procedure, starting from 4-chloro-*N*-methoxy-*N*-methylbenzamide (3.992 g, 20.0 mmol, 1.0 equiv), PMDTA (5.440 g, 6.60 mL, 32 mmol, 1.6 equiv) and *s*-BuLi (2.2 M in Et<sub>2</sub>O, 14.6 mL, 32 mmol, 1.6 equiv) in dry 2-MeTHF (60 mL), compound **23** was obtained in 73% yield (2.914 g) as a yellow solid after purification by column chromatography on silica gel (*n*-hexane:EtOAc 7:3).

*Spectroscopic and spectrometric data match with those ones reported for running the reaction at 1 mmol scale.*

**mp** = 65-70 °C

**<sup>1</sup>H NMR** (400 MHz, Acetone-*d*<sub>6</sub>)  $\delta$ : 8.53 (brs, 1H, NH), 7.96 (m, 2H, Ph H-2,6), 7.52 (m, 2H, Ph H-3,5), 4.80 (d, *J* = 6.6 Hz, 2H, CH<sub>2</sub>), 3.30 (s, 3H, OCH<sub>3</sub>).

**<sup>13</sup>C NMR** (100 MHz, Acetone-*d*<sub>6</sub>)  $\delta$ : 166.9 (C=O), 138.0 (Ph C-4), 134.1 (Ph C-1), 130.0 (Ph C-2,6), 129.4 (Ph C-3,5), 72.3 (CH<sub>2</sub>), 55.9 (OCH<sub>3</sub>).

**<sup>15</sup>N NMR** (40 MHz, Acetone-*d*<sub>6</sub>)  $\delta$ : -265.3 (NH).

**HRMS** (ESI),  $m/z$ : calcd. for C<sub>9</sub>H<sub>10</sub>ClNNaO<sub>2</sub><sup>+</sup>: 222.0292 [M + Na]<sup>+</sup>; found: 222.0280.

#### 3-fluoro-*N*-(methoxymethyl)benzamide (**24**)

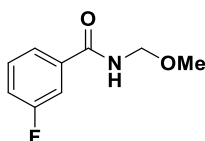

By following the general procedure, starting from 3-fluoro-*N*-methoxy-*N*-methylbenzamide (0.183 g, 1.0 mmol, 1.0 equiv), PMDTA (0.277 g, 0.33 mL, 1.6 mmol, 1.6 equiv) and *s*-BuLi (2.2 M in Et<sub>2</sub>O, 0.73 mL, 1.6

mmol, 1.6 equiv) in dry 2-MeTHF (3 mL), compound **24** was obtained in 78% yield (0.143 g) as a pale yellow solid after purification by column chromatography on silica gel (*n*-hexane:EtOAc 7:3).

**mp** = 42-45 °C

**<sup>1</sup>H NMR** (400 MHz, CDCl<sub>3</sub>) δ: 7.56 (m, 1H, Ph H-6), 7.54 (m, 1H, Ph H-2), 7.42 (m, 1H, Ph H-5), 7.22 (m, 1H, Ph H-4), 6.92 (brs, 1H, NH), 4.89 (d, *J* = 6.8 Hz, 2H, CH<sub>2</sub>), 3.40 (s, 3H, OCH<sub>3</sub>).

**<sup>13</sup>C NMR** (100 MHz, CDCl<sub>3</sub>) δ: 166.7 (C=O), 162.8 (d, <sup>1</sup>*J*<sub>C,F</sub> = 248.1 Hz, Ph C-3), 136.1 (d, <sup>3</sup>*J*<sub>C,F</sub> = 6.8 Hz, Ph C-1), 130.9 (d, <sup>3</sup>*J*<sub>C,F</sub> = 7.9 Hz, Ph C-5), 122.5 (d, <sup>4</sup>*J*<sub>C,F</sub> = 3.1 Hz, Ph C-6), 119.0 (d, <sup>2</sup>*J*<sub>C,F</sub> = 21.3 Hz, Ph C-4), 114.6 (d, <sup>2</sup>*J*<sub>C,F</sub> = 23.0 Hz, Ph C-2), 71.9 (CH<sub>2</sub>), 56.3 (CH<sub>3</sub>).

**<sup>15</sup>N NMR** (40 MHz, CDCl<sub>3</sub>) δ: -264.5 (NH).

**<sup>19</sup>F NMR** (376 MHz, CDCl<sub>3</sub>) δ: -111.5 (m).

**HRMS** (ESI), *m/z*: calcd. for C<sub>9</sub>H<sub>10</sub>FNNaO<sub>2</sub><sup>+</sup>: 206.0588 [M + Na]<sup>+</sup>; found: 206.0590.

### 2,5-difluoro-*N*-(methoxymethyl)benzamide (**25**)

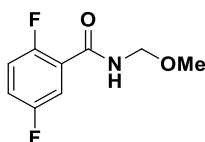

By following the general procedure, starting from 2,5-difluoro-*N*-methoxy-*N*-methylbenzamide (0.201 g, 1.0 mmol, 1.0 equiv), PMDTA (0.277 g, 0.33 mL, 1.6 mmol, 1.6 equiv) and *s*-BuLi (2.2 M in Et<sub>2</sub>O, 0.73 mL, 1.6 mmol, 1.6 equiv) in dry 2-MeTHF (3 mL), compound **25** was obtained in 60% yield (0.120 g) as a yellowish oil after purification by column chromatography on silica gel (*n*-hexane:EtOAc 8:2).

**<sup>1</sup>H NMR** (400 MHz, CDCl<sub>3</sub>) δ: 7.81 (m, 1H, Ph), 7.33 (brs, 1H, NH), 7.20 (m, 1H, Ph), 7.13 (m, 1H, Ph), 4.92 (dd, *J* = 6.6 Hz, *J* = 1.6 Hz, 2H, CH<sub>2</sub>), 3.41 (s, 3H, OCH<sub>3</sub>).

**<sup>13</sup>C NMR** (100 MHz, CDCl<sub>3</sub>) δ: 162.8 (m, C=O), 158.8 (m, Ph), 156.5 (m, Ph), 121.9 (dd, <sup>2</sup>*J*<sub>C,F</sub> = 14.1 Hz, <sup>3</sup>*J*<sub>C,F</sub> = 7.4 Hz, Ph C-1), 120.5 (dd, *J* = 24.6 Hz, *J* = 9.9 Hz, Ph), 118.4 (dd, *J* = 25.9 Hz, *J* = 2.8 Hz, Ph), 117.6 (dd, *J* = 28.2 Hz, *J* = 8.0 Hz, Ph), 71.9 (CH<sub>2</sub>), 56.3 (OCH<sub>3</sub>).

**<sup>19</sup>F NMR** (376 MHz, CDCl<sub>3</sub>) δ: -119.1 (m), -116.7 (m).

**HRMS** (ESI), *m/z*: calcd. for C<sub>9</sub>H<sub>9</sub>F<sub>2</sub>NNaO<sub>2</sub><sup>+</sup>: 224.0494 [M + Na]<sup>+</sup>; found: 224.0492.

### 2,6-difluoro-*N*-(methoxymethyl)benzamide (**26**)

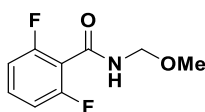

By following the general procedure, starting from 2,6-difluoro-*N*-methoxy-*N*-methylbenzamide (0.201 g, 1.0 mmol, 1.0 equiv), PMDTA (0.277 g, 0.33 mL, 1.6 mmol, 1.6 equiv) and *s*-BuLi (2.2 M in Et<sub>2</sub>O, 0.73 mL, 1.6

mmol, 1.6 equiv) in dry 2-MeTHF (3 mL), compound **26** was obtained in 65% yield (0.131 g) as a white solid after purification by column chromatography on silica gel (*n*-hexane:EtOAc 6:4).

**mp** = 52-55 °C

**<sup>1</sup>H NMR** (400 MHz, Acetone-*d*<sub>6</sub>) δ: 8.44 (brs, 1H, NH), 7.52 (m, 1H, Ph H-4), 7.09 (m, 2H, Ph H-3,5), 4.80 (d, *J* = 6.7 Hz, 2H, CH<sub>2</sub>), 3.35 (s, 3H, OCH<sub>3</sub>).

**<sup>13</sup>C NMR** (100 MHz, Acetone-*d*<sub>6</sub>) δ: 161.1 (C=O), 160.4 (dd, <sup>1</sup>*J*<sub>C,F</sub> = 249.3 Hz, <sup>3</sup>*J*<sub>C,F</sub> = 7.8 Hz, Ph C-2,6), 132.6 (t, <sup>3</sup>*J*<sub>C,F</sub> = 10.0 Hz, Ph C-4), 112.6 (m, Ph C-3,5), 71.8 (CH<sub>2</sub>), 55.9 (OCH<sub>3</sub>).

**<sup>19</sup>F NMR** (376 MHz, Acetone-*d*<sub>6</sub>) δ: -115.0 (m).

**HRMS** (ESI), *m/z*: calcd. for C<sub>9</sub>H<sub>9</sub>F<sub>2</sub>NNaO<sub>2</sub><sup>+</sup>: 224.0494 [M + Na]<sup>+</sup>; found: 224.0498.

#### 2-fluoro-*N*-(methoxymethyl)-5-(trifluoromethyl)benzamide (**27**)

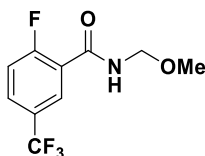

By following the general procedure, starting from 2-fluoro-*N*-methoxy-*N*-methyl-5-(trifluoromethyl)benzamide (0.251 g, 1.0 mmol, 1.0 equiv), PMDTA (0.277 g, 0.33 mL, 1.6 mmol, 1.6 equiv) and *s*-BuLi (2.2 M in Et<sub>2</sub>O, 0.73 mL, 1.6 mmol, 1.6 equiv) in dry 2-MeTHF (3 mL), compound **27** was obtained in 73% yield (0.183 g) as a yellow solid after purification by column chromatography on silica gel (*n*-hexane:EtOAc 8:2).

**mp**: 57 °C

**<sup>1</sup>H NMR** (400 MHz, C<sub>6</sub>D<sub>6</sub>) δ: 8.43 (dd, <sup>4</sup>*J* = 7.0 Hz, <sup>4</sup>*J* = 2.5 Hz, 1 H, Ph H-6), 6.99 (m, 1H, Ph H-4), 6.47 (brs, 1H, NH), 6.32 (dd, *J* = 10.9 Hz, *J* = 8.8 Hz, 1H, Ph H-3), 4.56 (dd, *J* = 6.7 Hz, *J* = 1.4 Hz, 2H, CH<sub>2</sub>), 3.16 (s, 3H, OCH<sub>3</sub>).

**<sup>13</sup>C NMR** (100 MHz, C<sub>6</sub>D<sub>6</sub>) δ: 162.0 (d, <sup>3</sup>*J*<sub>C,F</sub> = 3.1 Hz, C=O), 162.0 (d, <sup>1</sup>*J*<sub>C,F</sub> = 253.0 Hz, Ph C-2), 130.3 (m, Ph C-4), 130.1 (m, Ph C-6), 127.6 (m, Ph C-5), 124.0 (q, <sup>1</sup>*J*<sub>C,F</sub> = 272.2 Hz, CF<sub>3</sub>), 122.5 (d, <sup>2</sup>*J*<sub>C,F</sub> = 13.8 Hz, Ph C-1), 116.9 (d, <sup>3</sup>*J*<sub>C,F</sub> = 26.2 Hz, Ph C-3), 71.8 (CH<sub>2</sub>), 56.1 (OCH<sub>3</sub>).

**<sup>15</sup>N NMR** (40 MHz, C<sub>6</sub>D<sub>6</sub>) δ: -259.0 (NH).

**<sup>19</sup>F NMR** (376 MHz, C<sub>6</sub>D<sub>6</sub>) δ: -109.0 (m, F), -62.1 (d, *J* = 1.3 Hz, CF<sub>3</sub>).

**HRMS** (ESI), *m/z*: calcd. for C<sub>10</sub>H<sub>9</sub>F<sub>4</sub>NNaO<sub>2</sub><sup>+</sup>: 274.0462 [M + Na]<sup>+</sup>; found: 274.0461.

#### 4-hydroxy-*N*-(methoxymethyl)benzamide (**28**)

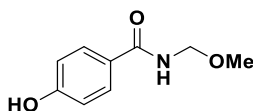

4-Hydroxy-*N*-methoxy-*N*-methylbenzamide (0.181 g, 1.0 mmol, 1.0 equiv) was pretreated in dry 2-MeTHF (3 mL) at -78 °C with MeLi (1.6 M Et<sub>2</sub>O, 0.61 mL, 0.98 mmol) for 5 min. Then, by following the general procedure, PMDTA (0.277 g, 0.33 mL, 1.6 mmol, 1.6 equiv) and *s*-BuLi (2.2 M in Et<sub>2</sub>O, 0.73 mL, 1.6 mmol, 1.6 equiv) were added, obtaining compound **28** in 77% yield (0.139 g) as colourless crystals after purification by column chromatography on silica gel (DCM:EtOAc 6:4).

**mp** = 156 °C

**<sup>1</sup>H NMR** (400 MHz, Acetone-*d*<sub>6</sub>) δ: 9.01 (s, 1H, OH), 8.27 (brs, 1H, NH), 7.84 (m, 2H, Ph H-2,6), 6.89 (m, 2H, Ph H-3,5), 4.77 (d, *J* = 6.7 Hz, 2H, CH<sub>2</sub>), 3.28 (s, 3H, OCH<sub>3</sub>).

**<sup>13</sup>C NMR** (100 MHz, Acetone-*d*<sub>6</sub>) δ: 167.5 (C=O), 161.4 (Ph C-4), 130.2 (Ph C-2,6), 126.5 (Ph C-1), 115.8 (Ph C-3,5), 72.2 (CH<sub>2</sub>), 55.7 (OCH<sub>3</sub>).

**<sup>15</sup>N NMR** (40 MHz, Acetone-*d*<sub>6</sub>) δ: -267.5 (NH).

**HRMS** (ESI), *m/z*: calcd. for C<sub>9</sub>H<sub>11</sub>NNaO<sub>3</sub><sup>+</sup>: 204.0631 [M + Na]<sup>+</sup>; found: 204.0623.

#### 4-amino-*N*-(methoxymethyl)benzamide (**29**)

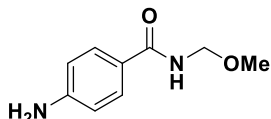

4-Amino-*N*-methoxy-*N*-methylbenzamide (0.180 g, 1.0 mmol, 1.0 equiv) was pretreated in dry 2-MeTHF (3 mL) at -78 °C with MeLi (1.6 M Et<sub>2</sub>O, 0.61 mL, 0.98 mmol) for 5 min. Then, by following the general procedure, PMDTA (0.277 g, 0.33 mL, 1.6 mmol, 1.6 equiv) and *s*-BuLi (2.2 M in Et<sub>2</sub>O, 0.73 mL, 1.6 mmol, 1.6 equiv) were added, obtaining compound **29** in 75% yield (0.135 g) as a yellow solid after purification by column chromatography on silica gel (DCM:EtOAc 6:4).

**mp** = 123 °C

**<sup>1</sup>H NMR** (400 MHz, Acetone-*d*<sub>6</sub>) δ: 8.08 (brs, 1H, NH), 7.71 (m, 2H, Ph H-2,6), 6.68 (m, 2H, Ph H-3,5), 5.18 (brs, 2H, NH<sub>2</sub>), 4.75 (d, *J* = 6.7 Hz, 2H, CH<sub>2</sub>), 3.26 (s, 3H, OCH<sub>3</sub>).

**<sup>13</sup>C NMR** (100 MHz, Acetone-*d*<sub>6</sub>) δ: 167.8 (C=O), 152.7 (Ph C-4), 129.9 (Ph C-2,6), 122.9 (Ph C-1), 114.0 (Ph C-3,5), 72.1 (CH<sub>2</sub>), 55.6 (OCH<sub>3</sub>).

**<sup>15</sup>N NMR** (40 MHz, Acetone-*d*<sub>6</sub>) δ: -320.3 (NH<sub>2</sub>), -269.2 (NH).

**HRMS** (ESI), *m/z*: calcd. for C<sub>9</sub>H<sub>12</sub>N<sub>2</sub>NaO<sub>2</sub><sup>+</sup>: 203.0791 [M + Na]<sup>+</sup>; found: 203.0791.

#### 3-ethynyl-*N*-(methoxymethyl)benzamide (**30**)

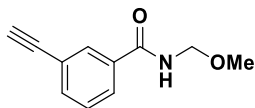

3-Ethynyl-*N*-methoxy-*N*-methylbenzamide (0.189 g, 1.0 mmol, 1.0 equiv) was pretreated in dry 2-MeTHF (3 mL) at -78 °C with MeLi (1.6 M Et<sub>2</sub>O, 0.61 mL, 0.98 mmol) for 15 min. Then, by following the general procedure, PMDTA (0.277 g, 0.33 mL, 1.6 mmol, 1.6 equiv) and *s*-BuLi (2.2 M in Et<sub>2</sub>O, 0.73 mL, 1.6 mmol, 1.6 equiv) were added, obtaining compound **30** in 62% yield (0.117 g) as a yellow solid after purification by column chromatography on silica gel (*n*-hexane:EtOAc 7:3).

mp = 58-61 °C

<sup>1</sup>H NMR (400 MHz, Acetone-d<sub>6</sub>) δ: 8.56 (brs, 1H, NH), 8.03 (m, 1H, Ph H-2), 7.96 (m, 1H, Ph H-6), 7.66 (m, 1H, Ph H-4), 7.51 (m, 1H, Ph H-5), 4.81 (d, *J* = 6.6 Hz, 2H, CH<sub>2</sub>), 3.74 (s, 1H, CCH), 3.31 (s, 3H, OCH<sub>3</sub>).

<sup>13</sup>C NMR (100 MHz, Acetone-d<sub>6</sub>) δ: 167.1 (C=O), 135.8 (Ph C-1), 135.5 (Ph C-4), 131.6 (Ph C-2), 129.7 (Ph C-5), 128.7 (Ph C-6), 123.5 (Ph C-3), 83.4 (CCH), 80.0 (CCH), 72.3 (CH<sub>2</sub>), 55.9 (OCH<sub>3</sub>).

<sup>15</sup>N NMR (40 MHz, Acetone-d<sub>6</sub>) δ: -264.8 (NH).

HRMS (ESI), *m/z*: calcd. for C<sub>11</sub>H<sub>11</sub>NNaO<sub>2</sub><sup>+</sup>: 212.0682 [M + Na]<sup>+</sup>; found: 212.0688.

#### *N*-(methoxymethyl)-2-naphthamide (**31**)

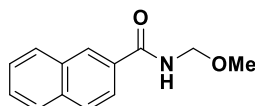

By following the general procedure, starting from *N*-methoxy-*N*-methyl-2-naphthamide (0.215 g, 1.0 mmol, 1.0 equiv), PMDTA (0.277 g, 0.33 mL, 1.6 mmol, 1.6 equiv) and *s*-BuLi (2.2 M in Et<sub>2</sub>O, 0.73 mL, 1.6 mmol, 1.6 equiv) in dry 2-MeTHF (3 mL), compound **31** was obtained in 60% yield (0.129 g) as a colourless oil after purification by column chromatography on silica gel (*n*-hexane:EtOAc 7:3).

<sup>1</sup>H NMR (400 MHz, Acetone-d<sub>6</sub>) δ: 8.63 (brs, 1H, NH), 8.52 (m, 1H, Naph H-1), 7.96–8.05 (m, 4H), 7.57–7.65 (m, 2H), 4.87 (d, *J* = 6.7 Hz, 2H, CH<sub>2</sub>), 3.34 (s, 3H, OCH<sub>3</sub>).

<sup>13</sup>C NMR (100 MHz, Acetone-d<sub>6</sub>) δ: 168.0 (C=O), 135.8 (Naph C-4a), 133.6 (Naph), 132.7 (Naph), 129.8 (Naph C-3), 129.0 (Naph), 128.59 (Naph), 128.58 (Naph), 128.54 (Naph C-1), 127.6 (Naph), 125.0 (Naph), 72.4 (CH<sub>2</sub>), 55.9 (OCH<sub>3</sub>).

HRMS (ESI), *m/z*: calcd. for C<sub>13</sub>H<sub>13</sub>NNaO<sub>2</sub><sup>+</sup>: 238.0838 [M + Na]<sup>+</sup>; found: 238.0841.

#### *N*-(methoxymethyl)-2-furamide (**32**)

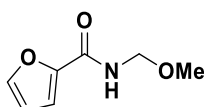

By following the general procedure, starting from *N*-methoxy-*N*-methylfuran-2-carboxamide (0.155 g, 1.0 mmol, 1.0 equiv), PMDTA (0.277 g, 0.33 mL, 1.6 mmol, 1.6 equiv) and *s*-BuLi (2.2 M in Et<sub>2</sub>O, 0.73 mL, 1.6 mmol, 1.6 equiv) in dry 2-MeTHF (3 mL), compound **32** was obtained in 62% yield (0.096 g) as a yellowish oil after purification by column chromatography on silica gel (*n*-hexane:EtOAc 6:4).

**<sup>1</sup>H NMR** (400 MHz, C<sub>6</sub>D<sub>6</sub>) δ: 7.03 (dd, <sup>3</sup>J = 3.5 Hz, <sup>4</sup>J = 0.8 Hz, 1H, furan H-3), 6.72 (dd, <sup>3</sup>J = 1.8 Hz, <sup>4</sup>J = 0.8 Hz, 1H, furan H-5), 6.29 (brs, 1H, NH), 5.86 (dd, <sup>3</sup>J = 3.5 Hz, <sup>3</sup>J = 1.8 Hz, 1H, furan H-4), 4.55 (d, J = 7.0 Hz, 2H, CH<sub>2</sub>), 3.14 (s, 3H, OCH<sub>3</sub>).

**<sup>13</sup>C NMR** (100 MHz, C<sub>6</sub>D<sub>6</sub>) δ: 158.3 (C=O), 148.4 (furan C-2), 143.6 (furan C-5), 115.0 (furan C-3), 112.3 (furan C-4), 71.0 (CH<sub>2</sub>), 55.8 (OCH<sub>3</sub>).

**<sup>15</sup>N NMR** (40 MHz, C<sub>6</sub>D<sub>6</sub>) δ: -268.3 (NH).

**HRMS** (ESI), *m/z*: calcd. for C<sub>7</sub>H<sub>9</sub>NNaO<sub>3</sub><sup>+</sup>: 178.0475 [M + Na]<sup>+</sup>; found: 178.0472.

### ***N*-(methoxymethyl)-2-thiophencarboxamide (33)**

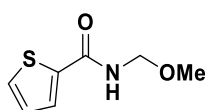

By following the general procedure, starting from *N*-methoxy-*N*-methylthiophene-2-carboxamide (0.171 g, 1.0 mmol, 1.0 equiv), PMDTA (0.277 g, 0.33 mL, 1.6 mmol, 1.6 equiv) and *s*-BuLi (2.2 M in Et<sub>2</sub>O, 0.73 mL, 1.6 mmol, 1.6 equiv) in dry 2-MeTHF (3 mL), compound **33** was obtained in 65% yield (0.111 g) as a yellow solid after purification by column chromatography on silica gel (*n*-hexane:EtOAc 7:3).

**mp** = 63 °C

**<sup>1</sup>H NMR** (400 MHz, Acetone-*d*<sub>6</sub>) δ: 8.45 (brs, 1H, NH), 7.79 (dd, <sup>3</sup>J = 3.7 Hz, <sup>4</sup>J = 1.1 Hz, 1H, thiophen H-3), 7.72 (dd, <sup>3</sup>J = 5.0 Hz, <sup>4</sup>J = 1.1 Hz, 1H, thiophen H-5), 7.14 (dd, <sup>3</sup>J = 5.0 Hz, <sup>3</sup>J = 3.7 Hz, 1H, thiophen H-4), 4.76 (d, J = 6.7 Hz, 2H, CH<sub>2</sub>), 3.29 (s, 3H, OCH<sub>3</sub>).

**<sup>13</sup>C NMR** (100 MHz, Acetone-*d*<sub>6</sub>) δ: 162.8 (C=O), 140.7 (thiophen C-2), 131.8 (thiophen C-5), 129.0 (thiophen C-3), 128.6 (thiophen C-4), 72.1 (CH<sub>2</sub>), 55.8 (OCH<sub>3</sub>).

**<sup>15</sup>N NMR** (40 MHz, Acetone-*d*<sub>6</sub>) δ: -266.4 (NH).

**HRMS** (ESI), *m/z*: calcd. for C<sub>7</sub>H<sub>9</sub>NNaO<sub>2</sub>S<sup>+</sup>: 194.0246 [M + Na]<sup>+</sup>; found: 194.0239.

### ***N*-(methoxymethyl)-4-(tributylstannyl)benzamide (34)**

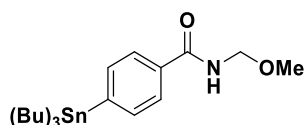

By following the general procedure, starting from *N*-methoxy-*N*-methyl-4-(tributylstannyl)benzamide (0.455 g, 1.0 mmol, 1.0 equiv), PMDTA (0.277 g, 0.33 mL, 1.6 mmol, 1.6 equiv) and *s*-BuLi (2.2 M in Et<sub>2</sub>O, 0.73 mL, 1.6 mmol, 1.6 equiv) in dry 2-MeTHF (3 mL), compound **34** was obtained in 61% yield (0.278 g) as a colourless oil after purification by column chromatography on silica gel (*n*-hexane:EtOAc 7:3).

**<sup>1</sup>H NMR** (400 MHz, C<sub>6</sub>D<sub>6</sub>) δ: 7.67 (m, 2H, Ph H-2,6), 7.50 (m, 2H, Ph H-3,5), 6.07 (brt, *J* = 6.8 Hz, 1H, NH), 4.70 (d, *J* = 6.8 Hz, 2H, CH<sub>2</sub>), 3.23 (s, 3H, OCH<sub>3</sub>), 1.59 (m, 6H, Bu H-2), 1.36 (m, 6H, Bu H-3), 1.08 (m, 6H, Bu H-1), 0.91 (t, *J* = 7.3 Hz, 9H, CH<sub>3</sub>).

**<sup>13</sup>C NMR** (100 MHz, C<sub>6</sub>D<sub>6</sub>) δ: 167.4 (C=O), 147.1 (Ph C-4), 136.8 (Ph C-3,5), 134.4 (Ph C-1), 126.8 (Ph C-2,6), 71.8 (CH<sub>2</sub>), 55.9 (OCH<sub>3</sub>), 29.5 (Bu C-2), 27.7 (Bu C-3), 13.9 (Bu C-4), 9.9 (Bu C-1).

**<sup>15</sup>N NMR** (40 MHz, C<sub>6</sub>D<sub>6</sub>) δ: -266.8 (NH).

**<sup>119</sup>Sn NMR** (149 MHz, C<sub>6</sub>D<sub>6</sub>) δ: -42.3 (s).

**HRMS** (ESI), *m/z*: calcd. for C<sub>21</sub>H<sub>37</sub>NNaO<sub>2</sub>Sn<sup>+</sup>: 478.1739 [M + Na]<sup>+</sup>; found: 478.1738.

#### 4-(*sec*-butylselanyl)-*N*-(methoxymethyl)benzamide (**35**)

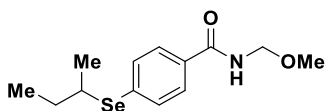

By following the general procedure, starting from *N*-methoxy-*N*-methyl-4-(phenylselanyl)benzamide (0.320 g, 1.0 mmol, 1.0 equiv), PMDTA (0.277 g, 0.33 mL, 1.6 mmol, 1.6 equiv) and *s*-BuLi (2.2 M in Et<sub>2</sub>O, 0.73 mL, 1.6 mmol, 1.6 equiv) in dry 2-MeTHF (3 mL), compound **35** was obtained in 66% yield (0.211 g) as a colourless oil after purification by column chromatography on silica gel (*n*-hexane:EtOAc 7:3).

**<sup>1</sup>H NMR** (400 MHz, Acetone-*d*<sub>6</sub>) δ: 8.46 (brs, 1H, NH), 7.85 (m, 2H, Ph H-2,6), 7.61 (m, 2H, Ph H-3,5), 4.79 (d, *J* = 6.6 Hz, 2H, CH<sub>2</sub>), 3.48 (sept., *J* = 6.7 Hz, 1H, CH), 3.30 (s, 3H, OCH<sub>3</sub>), 1.69 (m, 2H, CH<sub>2</sub>CH<sub>3</sub>), 1.43 (d, *J* = 6.9 Hz, 3H, CHCH<sub>3</sub>), 1.01 (t, *J* = 7.4 Hz, 3H, CH<sub>2</sub>CH<sub>3</sub>),

**<sup>13</sup>C NMR** (100 MHz, Acetone-*d*<sub>6</sub>) δ: 167.5 (C=O), 135.9 (Ph C-1,4), 133.7 (Ph C-3,5), 128.7 (Ph C-2,6), 72.3 (CH<sub>2</sub>), 55.9 (OCH<sub>3</sub>), 41.7 (CH), 31.1 (CH<sub>2</sub>CH<sub>3</sub>), 21.8 (CHCH<sub>3</sub>), 12.5 (CH<sub>2</sub>CH<sub>3</sub>).

**<sup>77</sup>Se NMR** (76 MHz, Acetone-*d*<sub>6</sub>) δ: 394.3 (s).

**HRMS** (ESI), *m/z*: calcd. for C<sub>13</sub>H<sub>19</sub>NNaO<sub>2</sub>Se<sup>+</sup>: 324.0473 [M + Na]<sup>+</sup>; found: 324.0476.

#### *N,N*-diethyl-*N'*-(methoxymethyl)terephthalamide (**36**)

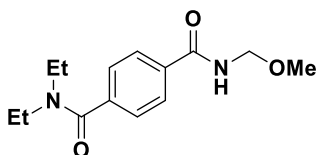

By following the general procedure, starting from *N,N*-diethyl-*N'*-methoxy-*N'*-methylterephthalamide (0.264 g, 1.0 mmol, 1.0 equiv), PMDTA (0.277 g, 0.33 mL, 1.6 mmol, 1.6 equiv) and *s*-BuLi (2.2 M in Et<sub>2</sub>O, 0.73 mL, 1.6 mmol, 1.6 equiv) in dry 2-MeTHF (3 mL), compound **36** was obtained in 68% yield (0.179 g) as a pale yellow solid after purification by column chromatography on silica gel (DCM:EtOAc 6:4).

**mp**: 65-67 °C

**<sup>1</sup>H NMR** (400 MHz, Acetone-*d*<sub>6</sub>)  $\delta$ : 8.54 (brs, 1H, NH), 7.99 (m, 2H, Ph H-3,5), 7.46 (m, 2H, Ph H-2,6), 4.81 (d, *J* = 6.6 Hz, 2H, CH<sub>2</sub>), 3.51 (brs, 2H, NCH<sub>2</sub>CH<sub>3</sub>), 3.31 (s, 3H, OCH<sub>3</sub>), 3.27 (brs, 2H, NCH<sub>2</sub>CH<sub>3</sub>), 1.18 (brs, 3H, NCH<sub>2</sub>CH<sub>3</sub>), 1.13 (brs, 3H, NCH<sub>2</sub>CH<sub>3</sub>).

**<sup>13</sup>C NMR** (100 MHz, Acetone-*d*<sub>6</sub>)  $\delta$ : 170.4 (C=O), 167.4 (C=O), 141.9 (Ph C-1), 135.6 (Ph C-4), 128.3 (Ph C-3,5), 127.2 (Ph C-2,6), 72.3 (CH<sub>2</sub>), 55.9 (OCH<sub>3</sub>), 43.8 (NCH<sub>2</sub>CH<sub>3</sub>), 39.8 (NCH<sub>2</sub>CH<sub>3</sub>), 14.4 (NCH<sub>2</sub>CH<sub>3</sub>), 13.2 (NCH<sub>2</sub>CH<sub>3</sub>).

**HRMS** (ESI), *m/z*: calcd. for C<sub>14</sub>H<sub>21</sub>N<sub>2</sub>O<sub>3</sub><sup>+</sup>: 265.1547 [M + H]<sup>+</sup>; found: 265.1534.

### *N*-(ethoxymethyl)benzamide (**37**)

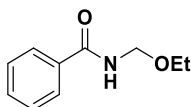

By following the general procedure, starting from *N*-ethoxy-*N*-methylbenzamide (0.179 g, 1.0 mmol, 1.0 equiv), PMDTA (0.277 g, 0.33 mL, 1.6 mmol, 1.6 equiv) and *s*-BuLi (2.2 M in Et<sub>2</sub>O, 0.73 mL, 1.6 mmol, 1.6 equiv) in dry 2-MeTHF (3 mL), compound **37** was obtained in 74% yield (0.132 g) as a white solid after purification by column chromatography on silica gel (*n*-hexane:EtOAc 7:3).

**mp** = 33-36 °C

**<sup>1</sup>H NMR** (400 MHz, Acetone-*d*<sub>6</sub>)  $\delta$ : 8.45 (brs, 1H, NH), 7.94 (m, 2H, Ph H-2,6), 7.55 (m, 1H, Ph H-4), 7.47 (m, 2H, Ph H-3,5), 4.86 (d, *J* = 6.6 Hz, 2H, CH<sub>2</sub>), 3.56 (q, *J* = 7.0 Hz, 2H, OCH<sub>2</sub>CH<sub>3</sub>), 1.13 (t, *J* = 7.0 Hz, 3H, OCH<sub>2</sub>CH<sub>3</sub>).

**<sup>13</sup>C NMR** (100 MHz, Acetone-*d*<sub>6</sub>)  $\delta$ : 167.8 (C=O), 135.5 (Ph C-1), 132.3 (Ph C-4), 129.2 (Ph C-3,5), 128.2 (Ph C-2,6), 70.7 (CH<sub>2</sub>), 64.0 (OCH<sub>2</sub>CH<sub>3</sub>), 15.5 (OCH<sub>2</sub>CH<sub>3</sub>).

**<sup>15</sup>N NMR** (40 MHz, Acetone-*d*<sub>6</sub>)  $\delta$ : -264.2 (NH).

**HRMS** (ESI), *m/z*: calcd. for C<sub>10</sub>H<sub>13</sub>NNaO<sub>2</sub><sup>+</sup>: 202.0838 [M + Na]<sup>+</sup>; found: 202.0850.

### *N*-(ethoxymethyl)-4-methylbenzamide (**38**)

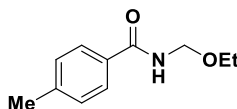

By following the general procedure, starting from *N*-ethoxy-*N*,4-dimethylbenzamide (0.193 g, 1.0 mmol, 1.0 equiv), PMDTA (0.277 g, 0.33 mL, 1.6 mmol, 1.6 equiv) and *s*-BuLi (2.2 M in Et<sub>2</sub>O, 0.73 mL, 1.6 mmol, 1.6 equiv) in dry 2-MeTHF (3 mL), compound **38** was obtained in 75% yield (0.144 g) as a yellowish solid after purification by column chromatography on silica gel (*n*-hexane:EtOAc 7:3).

**mp** = 81-83 °C

**<sup>1</sup>H NMR** (400 MHz, Acetone-*d*<sub>6</sub>)  $\delta$ : 8.44 (brs, 1H, NH), 7.84 (m, 2H, Ph H-2,6), 7.27 (m, 2H, Ph H-3,5), 4.83 (d, *J* = 6.6 Hz, 2H, CH<sub>2</sub>), 3.54 (q, *J* = 7.0 Hz, 2H, OCH<sub>2</sub>CH<sub>3</sub>), 2.37 (s, 3H, CH<sub>3</sub>), 1.12 (t, *J* = 7.0 Hz, 3H, OCH<sub>2</sub>CH<sub>3</sub>).

**<sup>13</sup>C NMR** (100 MHz, Acetone-d<sub>6</sub>) δ: 167.8 (C=O), 132.6 (Ph C-1), 142.7 (Ph C-4), 129.8 (Ph C-3,5), 128.2 (Ph C-2,6), 70.6 (CH<sub>2</sub>), 64.0 (OCH<sub>2</sub>CH<sub>3</sub>), 21.3 (CH<sub>3</sub>), 15.5 (OCH<sub>2</sub>CH<sub>3</sub>).

**<sup>15</sup>N NMR** (40 MHz, Acetone-d<sub>6</sub>) δ: -264.6 (NH).

**HRMS** (ESI), *m/z*: calcd. for C<sub>11</sub>H<sub>15</sub>NNaO<sub>2</sub><sup>+</sup>: 216.0995 [M + Na]<sup>+</sup>; found: 216.1011.

### 3-chloro-*N*-(ethoxymethyl)benzamide (**39**)

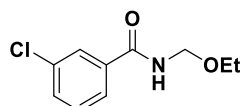

By following the general procedure, starting from 3-chloro-*N*-ethoxy-*N*-methylbenzamide (0.213 g, 1.0 mmol, 1.0 equiv), PMDTA (0.277 g, 0.33 mL, 1.6 mmol, 1.6 equiv) and *s*-BuLi (2.2 M in Et<sub>2</sub>O, 0.73 mL, 1.6 mmol, 1.6 equiv) in dry 2-MeTHF (3 mL), compound **39** was obtained in 71% yield (0.151 g) as a white solid after purification by column chromatography on silica gel (*n*-hexane:EtOAc 7:3).

**mp** = 64-66 °C

**<sup>1</sup>H NMR** (400 MHz, Acetone-d<sub>6</sub>) δ: 8.65 (brs, 1H, NH), 7.94 (m, 1H, Ph H-6), 7.88 (m, 1H, Ph H-2), 7.57 (m, 1H, Ph H-4), 7.50 (m, 1H, Ph H-3), 4.85 (d, *J* = 6.6 Hz, 2H, CH<sub>2</sub>), 3.56 (q, *J* = 7.0 Hz, 2H, OCH<sub>2</sub>CH<sub>3</sub>), 1.12 (t, *J* = 7.0 Hz, 3H, OCH<sub>2</sub>CH<sub>3</sub>).

**<sup>13</sup>C NMR** (100 MHz, Acetone-d<sub>6</sub>) δ: 166.6 (C=O), 137.3 (Ph C-1), 134.8 (Ph C-5), 132.2 (Ph C-4), 131.1 (Ph C-3), 128.2 (Ph C-6), 126.2 (Ph C-2), 70.7 (CH<sub>2</sub>), 64.1 (OCH<sub>2</sub>CH<sub>3</sub>), 15.5 (OCH<sub>2</sub>CH<sub>3</sub>).

**<sup>15</sup>N NMR** (40 MHz, Acetone-d<sub>6</sub>) δ: -262.8 (NH).

**HRMS** (ESI), *m/z*: calcd. for C<sub>10</sub>H<sub>12</sub>ClNNaO<sub>2</sub><sup>+</sup>: 236.0449 [M + Na]<sup>+</sup>; found: 236.0447.

### *N*-(isopropoxymethyl)benzamide (**40**)

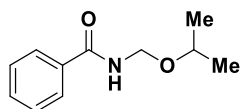

By following the general procedure, starting from *N*-isopropoxy-*N*-methylbenzamide (0.193 g, 1.0 mmol, 1.0 equiv), PMDTA (0.277 g, 0.33 mL, 1.6 mmol, 1.6 equiv) and *s*-BuLi (2.2 M in Et<sub>2</sub>O, 0.73 mL, 1.6 mmol, 1.6 equiv) in dry 2-MeTHF (3 mL), compound **40** was obtained in 73% yield (0.140 g) as a colourless oil after purification by column chromatography on silica gel (*n*-hexane:EtOAc 7:3).

**<sup>1</sup>H NMR** (400 MHz, Acetone-d<sub>6</sub>) δ: 8.40 (brs, 1H, NH), 7.94 (m, 2H, Ph H-2,6), 7.54 (m, 1H, Ph H-4), 7.47 (m, 2H, Ph H-3,5), 4.88 (d, *J* = 6.6 Hz, 2H, CH<sub>2</sub>), 3.86 (sept., *J* = 6.1 Hz, 1H, CH), 1.12 (d, *J* = 6.1 Hz, 6H, CH<sub>3</sub>).

**<sup>13</sup>C NMR** (100 MHz, Acetone-d<sub>6</sub>) δ: 167.7 (C=O), 135.5 (Ph C-1), 132.3 (Ph C-4), 129.2 (Ph C-3,5), 128.2 (Ph C-2,6), 69.3 (CH), 68.7 (CH<sub>2</sub>), 22.8 (CH<sub>3</sub>).

**<sup>15</sup>N NMR** (40 MHz, Acetone-d<sub>6</sub>) δ: -263.0 (NH).

**HRMS** (ESI), *m/z*: calcd. for C<sub>11</sub>H<sub>15</sub>NNaO<sub>2</sub><sup>+</sup>: 216.0995 [M + Na]<sup>+</sup>; found: 216.0997.

***N*-{[(2-methyl-2-propanyloxy)methyl]benzamide (41)}**

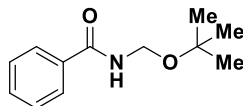

By following the general procedure, starting from *N*-(*tert*-butoxy)-*N*-methylbenzamide (0.207 g, 1.0 mmol, 1.0 equiv), PMDTA (0.277 g, 0.33 mL, 1.6 mmol, 1.6 equiv) and *s*-BuLi (2.2 M in Et<sub>2</sub>O, 0.73 mL, 1.6 mmol, 1.6 equiv) in dry 2-MeTHF (3 mL), compound **41** was obtained in 80% yield (0.166 g) as a colourless oil after purification by column chromatography on silica gel (*n*-hexane:EtOAc 8:2).

**<sup>1</sup>H NMR** (400 MHz, Acetone-d<sub>6</sub>) δ: 8.23 (brs, 1H, NH), 7.93 (m, 2H, Ph H-2,6), 7.53 (m, 1H, Ph H-4), 7.46 (m, 2H, Ph H-3,5), 4.90 (d, *J* = 6.5 Hz, 2H, CH<sub>2</sub>), 1.24 (s, 9H, CH<sub>3</sub>).

**<sup>13</sup>C NMR** (100 MHz, Acetone-d<sub>6</sub>) δ: 167.1 (C=O), 135.8 (Ph C-1), 132.2 (Ph C-4), 129.2 (Ph C-3,5), 128.1 (Ph C-2,6), 73.7 (C(CH<sub>3</sub>)<sub>3</sub>), 65.1 (CH<sub>2</sub>), 28.4 (CH<sub>3</sub>).

**<sup>15</sup>N NMR** (40 MHz, Acetone-d<sub>6</sub>) δ: -262.1 (NH).

**HRMS** (ESI), *m/z*: calcd. for C<sub>12</sub>H<sub>17</sub>NNaO<sub>2</sub><sup>+</sup>: 230.1151 [M + Na]<sup>+</sup>; found: 230.1154.

***N*-[(allyloxy)methyl]benzamide (42)**

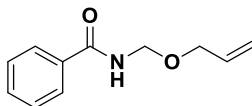

By following the general procedure, starting from *N*-(allyloxy)-*N*-methylbenzamide (0.191 g, 1.0 mmol, 1.0 equiv), PMDTA (0.277 g, 0.33 mL, 1.6 mmol, 1.6 equiv) and *s*-BuLi (2.2 M in Et<sub>2</sub>O, 0.73 mL, 1.6 mmol, 1.6 equiv) in dry 2-MeTHF (3 mL), compound **42** was obtained in 65% yield (0.124 g) as a yellow oil after purification by column chromatography on silica gel (*n*-hexane:EtOAc 7:3).

**<sup>1</sup>H NMR** (400 MHz, Acetone-d<sub>6</sub>) δ: 8.50 (brs, 1H, NH), 7.95 (m, 2H, Ph H-2,6), 7.55 (m, 1H, Ph H-4), 7.48 (m, 2H, Ph H-3,5), 5.91 (m, 1H, OCH<sub>2</sub>CHCH<sub>2</sub>), 5.27 (m, <sup>3</sup>*J*<sub>trans</sub> = 17.3 Hz, 1H, OCH<sub>2</sub>CHCH<sub>2</sub>), 5.09 (m, <sup>3</sup>*J*<sub>cis</sub> = 10.5 Hz, 1H, OCH<sub>2</sub>CHCH<sub>2</sub>), 4.89 (d, *J* = 6.7 Hz, 2H, CH<sub>2</sub>), 4.07 (m, 2H, OCH<sub>2</sub>CHCH<sub>2</sub>).

**<sup>13</sup>C NMR** (100 MHz, Acetone-d<sub>6</sub>) δ: 167.9 (C=O), 136.2 (OCH<sub>2</sub>CHCH<sub>2</sub>), 135.4 (Ph C-1), 132.4 (Ph C-4), 129.3 (Ph C-3,5), 128.2 (Ph C-2,6), 116.2 (OCH<sub>2</sub>CHCH<sub>2</sub>), 70.6 (CH<sub>2</sub>), 69.6 (OCH<sub>2</sub>CHCH<sub>2</sub>).

**<sup>15</sup>N NMR** (40 MHz, Acetone-d<sub>6</sub>) δ: -264.3 (NH).

**HRMS** (ESI), *m/z*: calcd. for C<sub>11</sub>H<sub>13</sub>NNaO<sub>2</sub><sup>+</sup>: 214.0838 [M + Na]<sup>+</sup>; found: 214.0844.

#### ***N*-[(2-propyn-1-yloxy)methyl]benzamide (**43**)**

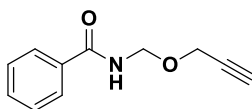

By following the general procedure, starting from *N*-methyl-*N*-(prop-2-yn-1-yloxy)benzamide (0.189 g, 1.0 mmol, 1.0 equiv), PMDTA (0.277 g, 0.33 mL, 1.6 mmol, 1.6 equiv) and *s*-BuLi (2.2 M in Et<sub>2</sub>O, 0.73 mL, 1.6 mmol, 1.6 equiv) in dry 2-MeTHF (3 mL), compound **43** was obtained in 63% yield (0.119 g) as a colourless oil after purification by column chromatography on silica gel (*n*-hexane:EtOAc 8:2).

**<sup>1</sup>H NMR** (400 MHz, Acetone-*d*<sub>6</sub>) δ: 8.56 (brs, 1H, NH), 7.95 (m, 2H, Ph H-2,6), 7.56 (m, 1H, Ph H-4), 7.48 (m, 2H, Ph H-3,5), 4.94 (d, *J* = 6.7 Hz, 2H, CH<sub>2</sub>), 4.24 (d, *J* = 2.4 Hz, 2H, CH<sub>2</sub>CCH), 2.90 (t, *J* = 2.4 Hz, 1H, CH<sub>2</sub>CCH).

**<sup>13</sup>C NMR** (100 MHz, Acetone-*d*<sub>6</sub>) δ: 168.0 (C=O), 135.2 (Ph C-1), 132.5 (Ph C-4), 129.3 (Ph C-3,5), 128.2 (Ph C-2,6), 81.1 (CH<sub>2</sub>CCH), 75.4 (CH<sub>2</sub>CCH), 70.1 (CH<sub>2</sub>), 55.9 (CH<sub>2</sub>CCH).

**<sup>15</sup>N NMR** (40 MHz, Acetone-*d*<sub>6</sub>) δ: -265.7 (NH).

**HRMS** (ESI), *m/z*: calcd. for C<sub>11</sub>H<sub>11</sub>NNaO<sub>2</sub><sup>+</sup>: 212.0682 [M + Na]<sup>+</sup>; found: 212.0684.

#### ***N*-[(cyclopropylmethoxy)methyl]benzamide (**44**)**

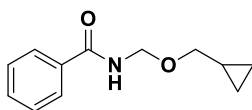

By following the general procedure, starting from *N*-(cyclopropylmethoxy)-*N*-methylbenzamide (0.205 g, 1.0 mmol, 1.0 equiv), PMDTA (0.277 g, 0.33 mL, 1.6 mmol, 1.6 equiv) and *s*-BuLi (2.2 M in Et<sub>2</sub>O, 0.73 mL, 1.6 mmol, 1.6 equiv) in dry 2-MeTHF (3 mL), compound **44** was obtained in 70% yield (0.143 g) as a white solid after purification by column chromatography on silica gel (*n*-hexane:EtOAc 7:3).

**mp** = 53-55 °C

**<sup>1</sup>H NMR** (400 MHz, Acetone-*d*<sub>6</sub>) δ: 8.45 (brs, 1H, NH), 7.94 (m, 2H, Ph H-2,6), 7.54 (m, 1H, Ph H-4), 7.47 (m, 2H, Ph H-3,5), 4.88 (d, *J* = 6.6 Hz, 2H, NCH<sub>2</sub>), 3.37 (d, *J* = 6.8 Hz, 2H, CH<sub>2</sub>), 1.02 (m, 1H, cyclopropane H-1), 0.44 (m, 2H, cyclopropane H-2,3), 0.18 (m, 2H, cyclopropane H-2,3).

**<sup>13</sup>C NMR** (100 MHz, Acetone-*d*<sub>6</sub>) δ: 167.8 (C=O), 135.4 (Ph C-1), 132.3 (Ph C-4), 129.2 (Ph C-3,5), 128.2 (Ph C-2,6), 73.2 (CH<sub>2</sub>), 70.7 (NCH<sub>2</sub>), 11.3 (cyclopropane C-1), 3.2 (cyclopropane C-2,3).

**<sup>15</sup>N NMR** (40 MHz, Acetone-*d*<sub>6</sub>) δ: -263.9 (NH).

**HRMS** (ESI), *m/z*: calcd. for C<sub>12</sub>H<sub>15</sub>NNaO<sub>2</sub><sup>+</sup>: 228.0995 [M + Na]<sup>+</sup>; found: 228.0992.

#### *N*-[(methoxymethoxy)methyl]benzamide (**45**)

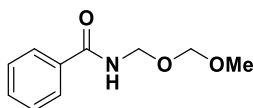

By following the general procedure, starting from *N*-(methoxymethoxy)-*N*-methylbenzamide (0.195 g, 1.0 mmol, 1.0 equiv), PMDTA (0.277 g, 0.33 mL, 1.6 mmol, 1.6 equiv) and *s*-BuLi (2.2 M in Et<sub>2</sub>O, 0.73 mL, 1.6 mmol, 1.6 equiv) in dry 2-MeTHF (3 mL), compound **45** was obtained in 67% yield (0.130 g) as a white solid after purification by column chromatography on silica gel (*n*-hexane:EtOAc 6:4).

**mp** = 30-32 °C

**<sup>1</sup>H NMR** (400 MHz, Acetone-*d*<sub>6</sub>)  $\delta$ : 8.56 (brs, 1H, NH), 7.95 (m, 2H, Ph H-2,6), 7.55 (m, 1H, Ph H-4), 7.47 (m, 2H, Ph H-3,5), 4.95 (d, *J* = 6.7 Hz, 2H, NCH<sub>2</sub>), 4.71 (s, 2H CH<sub>2</sub>OCH<sub>3</sub>), 3.32 (s, 3H, CH<sub>3</sub>).

**<sup>13</sup>C NMR** (100 MHz, Acetone-*d*<sub>6</sub>)  $\delta$ : 167.9 (C=O), 135.3 (Ph C-1), 132.4 (Ph C-4), 129.3 (Ph C-3,5), 128.8 (Ph C-2,6), 95.1 (CH<sub>2</sub>OCH<sub>3</sub>), 68.3 (NCH<sub>2</sub>), 55.4 (CH<sub>3</sub>).

**<sup>15</sup>N NMR** (40 MHz, Acetone-*d*<sub>6</sub>)  $\delta$ : -264.8 (NH).

**HRMS** (ESI), *m/z*: calcd. for C<sub>10</sub>H<sub>13</sub>NNaO<sub>3</sub><sup>+</sup>: 218.0788 [M + Na]<sup>+</sup>; found: 218.0790.

#### *N*-(phenoxy)methylbenzamide (**46**)

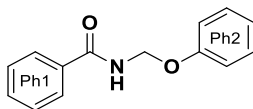

By following the general procedure, starting from *N*-methyl-*N*-phenoxybenzamide (0.227 g, 1.0 mmol, 1.0 equiv), PMDTA (0.277 g, 0.33 mL, 1.6 mmol, 1.6 equiv) and *s*-BuLi (2.2 M in Et<sub>2</sub>O, 0.73 mL, 1.6 mmol, 1.6 equiv) in dry 2-MeTHF (3 mL), compound **46** was obtained in 74% yield (0.168 g) as a white solid after purification by column chromatography on silica gel (DCM).

**mp** = 110-115 °C

**<sup>1</sup>H NMR** (400 MHz, Acetone-*d*<sub>6</sub>)  $\delta$ : 8.77 (brs, 1H, NH), 7.95 (m, 2H, Ph1 H-2,6), 7.56 (m, 1H, Ph1 H-4), 7.48 (m, 2H, Ph1 H-3,5), 7.28 (m, 2H, Ph2 H-3,5), 7.06 (m, 2H, Ph2 H-2,6), 6.94 (m, 1H, Ph2 H-4), 5.47 (d, *J* = 6.7 Hz, 2H, CH<sub>2</sub>).

**<sup>13</sup>C NMR** (100 MHz, Acetone-*d*<sub>6</sub>)  $\delta$ : 167.7 (C=O), 158.2 (Ph2 C-1), 135.0 (Ph1 C-1), 132.6 (Ph1 C-4), 130.3 (Ph2 C-3,5), 129.3 (Ph1 C-3,5), 128.3 (Ph1 C-2,6), 122.0 (Ph2 C-4), 116.4 (Ph2 C-2,6), 69.4 (CH<sub>2</sub>).

**<sup>15</sup>N NMR** (40 MHz, Acetone-*d*<sub>6</sub>)  $\delta$ : -266.8 (NH).

**HRMS** (ESI), *m/z*: calcd. for C<sub>14</sub>H<sub>13</sub>NNaO<sub>2</sub><sup>+</sup>: 250.0838 [M + Na]<sup>+</sup>; found: 250.0845.

#### ***N*-[(benzyloxy)methyl]benzamide (47)**

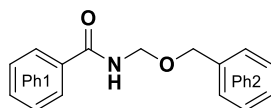

By following the general procedure, starting from *N*-(benzyloxy)-*N*-methylbenzamide (0.241 g, 1.0 mmol, 1.0 equiv), PMDTA (0.277 g, 0.33 mL, 1.6 mmol, 1.6 equiv) and *s*-BuLi (2.2 M in Et<sub>2</sub>O, 0.73 mL, 1.6 mmol, 1.6 equiv) in dry 2-MeTHF (3 mL), compound **47** was obtained in 77% yield (0.186 g) as a white solid after purification by column chromatography on silica gel (*n*-hexane:EtOAc 7:3).

**mp** = 60-64 °C

**<sup>1</sup>H NMR** (400 MHz, Acetone-*d*<sub>6</sub>) δ: 8.58 (brs, 1H, NH), 7.96 (m, 2H, Ph1 H-2,6), 7.55 (m, 1H, Ph1 H-4), 7.48 (m, 2H, Ph1 H-3,5), 7.37 (m, 2H, Ph2 H-2,6), 7.32 (m, 2H, Ph2 H-3,5), 7.25 (m, 1H, Ph2 H-4), 4.98 (d, *J* = 6.6 Hz, 2H, NCH<sub>2</sub>), 4.63 (s, 2H, CH<sub>2</sub>Ph).

**<sup>13</sup>C NMR** (100 MHz, Acetone-*d*<sub>6</sub>) δ: 168.0 (C=O), 139.8 (Ph2 C-1), 135.4 (Ph1 C-1), 132.4 (Ph1 C-4), 129.3 (Ph1 C-3,5), 129.0 (Ph2 C-3,5), 128.4 (Ph2 C-2,6), 128.2 (Ph1 C-2,6), 128.1 (Ph2 C-4), 70.8 (NCH<sub>2</sub>), 70.7 (CH<sub>2</sub>Ph).

**<sup>15</sup>N NMR** (40 MHz, Acetone-*d*<sub>6</sub>) δ: -264.4 (NH).

**HRMS** (ESI), *m/z*: calcd. for C<sub>15</sub>H<sub>15</sub>NNaO<sub>2</sub><sup>+</sup>: 264.0995 [M + Na]<sup>+</sup>; found: 264.1009.

#### ***N*-[(4-biphenyl)methoxy)methyl]benzamide (48)**

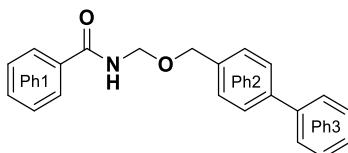

By following the general procedure, starting from *N*-[(1,1'-biphenyl)-4-ylmethoxy]-*N*-methylbenzamide (0.317 g, 1.0 mmol, 1.0 equiv), PMDTA (0.277 g, 0.33 mL, 1.6 mmol, 1.6 equiv) and *s*-BuLi (2.2 M in Et<sub>2</sub>O, 0.73 mL, 1.6 mmol, 1.6 equiv) in dry 2-MeTHF (3 mL), compound **48** was obtained in 79% yield (0.250 g) as a white solid after purification by column chromatography on silica gel (*n*-hexane:EtOAc 7:3).

**mp** = 134-136 °C

**<sup>1</sup>H NMR** (400 MHz, Acetone-*d*<sub>6</sub>) δ: 8.60 (brs, 1H, NH), 7.96 (m, 2H, Ph1 H-2,6), 7.64 (m, 2H, Ph3 H-2,6), 7.62 (m, 2H, Ph2 H-2,6), 7.56 (m, 1H, Ph1 H-4), 7.48 (m, 2H, Ph1 H-3,5), 7.47 (m, 2H, Ph2 H-3,5), 7.45 (m, 2H, Ph3 H-3,5), 7.35 (m, 1H, Ph3 H-4), 5.01 (d, *J* = 6.7 Hz, 2H, NCH<sub>2</sub>), 4.69 (s, 2H, CH<sub>2</sub>).

**<sup>13</sup>C NMR** (100 MHz, Acetone-*d*<sub>6</sub>) δ: 168.0 (C=O), 141.6 (Ph3 C-1), 140.9 (Ph2 C-1), 139.0 (Ph2 C-4), 135.4 (Ph1 C-1), 132.4 (Ph1 C-4), 129.7 (Ph3 C-3,5), 129.2 (Ph1 C-3,5), 129.0 (Ph2 C-3,5), 128.2 (Ph1 C-2,6), 128.1 (Ph3 C-4), 127.7 (Ph3 C-2,6), 127.6 (Ph2 C-2,6), 70.8 (NCH<sub>2</sub>), 70.4 (CH<sub>2</sub>).

**<sup>15</sup>N NMR** (40 MHz, Acetone-*d*<sub>6</sub>) δ: -264.2 (NH).

**HRMS** (ESI), *m/z*: calcd. for C<sub>21</sub>H<sub>19</sub>NNaO<sub>2</sub><sup>+</sup>: 340.1308 [M + Na]<sup>+</sup>; found: 340.1306.

## 2-methyl-1-phenylbutan-1-one (50)

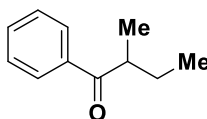

By following the general procedure, starting from *N*-ethyl-*N*-methoxybenzamide **49**<sup>[11]</sup> (0.179 g, 1.0 mmol, 1.0 equiv), PMDTA (0.277 g, 0.33 mL, 1.6 mmol, 1.6 equiv) and *s*-BuLi (2.2 M in Et<sub>2</sub>O, 0.73 mL, 1.6 mmol, 1.6 equiv) in dry 2-MeTHF (3 mL), compound **50**<sup>[12]</sup> was obtained in quantitative yield (0.162 g) as a colorless oil which did not require purification.

<sup>1</sup>H NMR (200 MHz, CDCl<sub>3</sub>) δ: 7.97-7.94 (m, 2H), 7.55-7.42 (m, 3H), 3.45-3.35 (m, 1H), 1.87-1.77 (m, 1H), 1.56-1.46 (m, 1H), 1.19 (d, *J* = 6.8 Hz, 3H), 0.92 (t, *J* = 7.3 Hz, 3H).

<sup>13</sup>C NMR (50 MHz, CDCl<sub>3</sub>) δ: 204.1, 136.8, 132.9, 128.7, 128.3, 42.2, 26.8, 16.9, 11.9.

HRMS (ESI), *m/z*: calcd. for C<sub>11</sub>H<sub>14</sub>NaO<sup>+</sup>: 185.0937 [M + Na]<sup>+</sup>; found: 185.0932.

## *N*-(methoxymethyl)-4-[[methoxy(methyl)amino]methyl]benzamine (52)

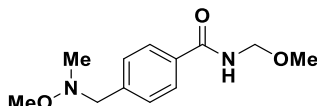

By following the general procedure, starting from *N*-methoxy-4-((methoxy(methyl)amino)methyl)-*N*-methylbenzamide (0.238 g, 1.0 mmol, 1.0 equiv), PMDTA (0.277 g, 0.33 mL, 1.6 mmol, 1.6 equiv) and *s*-BuLi (2.2 M in Et<sub>2</sub>O, 0.73 mL, 1.6 mmol, 1.6 equiv) in dry 2-MeTHF (3 mL), compound **52** was obtained in 66% yield (0.157 g) as a white solid after purification by column chromatography on silica gel (DCM:EtOAc 6:4).

mp = 55-58 °C

<sup>1</sup>H NMR (400 MHz, Acetone-d<sub>6</sub>) δ: 8.44 (brs, 1H, NH), 7.90 (m, 2H, Ph H-2,6), 7.46 (m, 2H, Ph H-3,5), 4.80 (d, *J* = 6.6 Hz, 2H, CH<sub>2</sub>), 3.81 (s, 2H, CH<sub>2</sub>), 3.31 (s, 3H, NOCH<sub>3</sub>), 3.30 (s, 3H, OCH<sub>3</sub>), 2.58 (s, 3H, NCH<sub>3</sub>).

<sup>13</sup>C NMR (100 MHz, Acetone-d<sub>6</sub>) δ: 167.8 (C=O), 143.0 (Ph C-4), 134.2 (Ph C-1), 130.1 (Ph C-3,5), 128.0 (Ph C-2,6), 72.3 (CH<sub>2</sub>), 64.7 (CH<sub>2</sub>), 59.8 (NOCH<sub>3</sub>), 55.8 (OCH<sub>3</sub>), 45.1 (NCH<sub>3</sub>).

<sup>15</sup>N NMR (40 MHz, Acetone-d<sub>6</sub>) δ: -265.5 (NH), -218.8 (N).

HRMS (ESI), *m/z*: calcd. for C<sub>12</sub>H<sub>18</sub>N<sub>2</sub>NaO<sub>3</sub><sup>+</sup>: 261.1210 [M + Na]<sup>+</sup>; found: 261.1222.

### ***N*-methoxy-*N*-(<sup>2</sup>H<sub>3</sub>)methylbenzamide (**53**)**

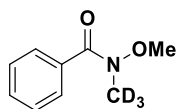

To a solution of *N*-methoxybenzamide<sup>[13]</sup> (0.200 g, 1.32 mmol, 1.0 equiv) and Cs<sub>2</sub>CO<sub>3</sub> (0.873 g, 2.7 mmol, 2 equiv) in dry DMF (3 mL) Iodomethane-*d*<sub>3</sub> (0.287, 1.98 mmol, 1.5 equiv) was added and the reaction was stirred overnight at room temperature. The reaction was quenched with sat. aqueous NH<sub>4</sub>Cl and the reaction mixture was extracted with Et<sub>2</sub>O (3 x 10 ml). The combined organic extracts were dried over Na<sub>2</sub>SO<sub>4</sub> and the solvent was removed under reduced pressure. Compound **53** was obtained without purification in 97% yield (0.212 g) as colorless oil.

<sup>1</sup>H NMR (400 MHz, CDCl<sub>3</sub>) δ: 7.67 (m, 2H, Ph H-2,6), 7.45 (m, 1H, Ph H-4), 7.40 (m, 2H, Ph H-3,5), 3.56 (s, 3H, OCH<sub>3</sub>).

<sup>13</sup>C NMR (100 MHz, CDCl<sub>3</sub>) δ: 170.0 (C=O), 134.1 (Ph C-1), 130.5 (Ph H-4), 128.1 (Ph C-2,6), 128.0 (Ph C-3,5), 61.0 (OCH<sub>3</sub>).

HRMS (ESI), *m/z*: calcd. for C<sub>9</sub>H<sub>9</sub>D<sub>3</sub>NO<sub>2</sub><sup>+</sup>: 169.1051 [M + H]<sup>+</sup>; found: 169.1054.

### ***N*-[methoxy(<sup>2</sup>H<sub>2</sub>)methyl]benzamide (**54**)**

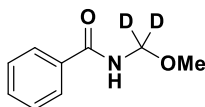

By following the general procedure, starting from *N*-methyl-*N*-[(<sup>2</sup>H<sub>3</sub>)methyloxy]benzamide (compound **53**) (0.168 g, 1.0 mmol, 1.0 equiv), PMDTA (0.277 g, 0.33 mL, 1.6 mmol, 1.6 equiv) and *s*-BuLi (2.2 M in Et<sub>2</sub>O, 0.73 mL, 1.6 mmol, 1.6 equiv) in dry 2-MeTHF (3 mL), compound **54** was obtained in 62% yield (0.104 g) as a white solid after purification by column chromatography on silica gel (*n*-hexane:EtOAc 7:3).

mp = 61–64 °C

<sup>1</sup>H NMR (400 MHz, Acetone-*d*<sub>6</sub>) δ: 8.44 (brs, 1H, NH), 7.94 (m, 2H, Ph H-2,6), 7.55 (m, 1H, Ph H-4), 7.48 (m, 2H, Ph H-3,5), 3.30 (s, 3H, CH<sub>3</sub>).

<sup>13</sup>C NMR (100 MHz, Acetone-*d*<sub>6</sub>) δ: 167.9 (C=O), 135.4 (Ph C-1), 132.4 (Ph C-4), 129.3 (Ph C-3,5), 128.2 (Ph C-2,6), 55.8 (CH<sub>3</sub>).

HRMS (ESI), *m/z*: calcd. for C<sub>9</sub>H<sub>9</sub>D<sub>2</sub>NNaO<sub>2</sub><sup>+</sup>: 190.0808 [M + Na]<sup>+</sup>; found: 190.0807.

### ***N*-methyl-*N*-[(<sup>2</sup>H<sub>3</sub>)methyloxy]benzamide (**55**)**

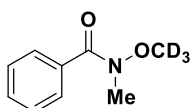

To a solution of *N*-hydroxy-*N*-methylbenzamide<sup>[6]</sup> (0.200 g, 1.32 mmol, 1.0 equiv) and Cs<sub>2</sub>CO<sub>3</sub> (0.873 g, 2.68 mmol, 2 equiv) in dry DMF (3 mL) Iodomethane-*d*<sub>3</sub> (0.287g, 1.98 mmol, 2.0 equiv) was added and the reaction

was stirred overnight at room temperature. The reaction was quenched with sat. aqueous  $\text{NH}_4\text{Cl}$  and the reaction mixture was extracted with  $\text{Et}_2\text{O}$  (3 x 10 mL). The combined organic extracts were dried over  $\text{Na}_2\text{SO}_4$  and the solvent was removed under reduced pressure. The compound **55** was obtained without purification in 95% yield (0.207 g) as colorless oil.

**$^1\text{H}$  NMR** (400 MHz,  $\text{CDCl}_3$ )  $\delta$ : 7.67 (m, 2H, Ph H-2,6), 7.45 (m, 1H, Ph H-4), 7.40 (m, 2H, Ph H-3,5), 3.36 (s, 3H,  $\text{CH}_3$ ).

**$^{13}\text{C}$  NMR** (100 MHz,  $\text{CDCl}_3$ )  $\delta$ : 170.0 (C=O), 134.1 (Ph C-1), 130.5 (Ph H-4), 128.1 (Ph C-2,6), 128.0 (Ph C-3,5), 33.8 ( $\text{CH}_3$ ).

**HRMS** (ESI),  $m/z$ : calcd. for  $\text{C}_9\text{H}_8\text{D}_3\text{NNaO}_2^+$ : 191.0870  $[\text{M} + \text{Na}]^+$ ; found: 191.0873.

#### ***N*-{[( $^2\text{H}_3$ )methyloxy]methyl}benzamide (**56**)**

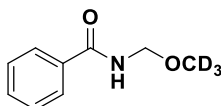

By following the general procedure, starting from *N*-methyl-*N*-[( $^2\text{H}_3$ )methyloxy]benzamide (compound **55**) (0.168 g, 1.0 mmol, 1.0 equiv), PMDTA (0.277 g, 0.33 mL, 1.6 mmol, 1.6 equiv) and *s*-BuLi (2.2 M in  $\text{Et}_2\text{O}$ , 0.73 mL, 1.6 mmol, 1.6 equiv) in dry 2-MeTHF (3 mL), compound **56** was obtained in 64% yield (0.107 g) as a white solid after purification by column chromatography on silica gel (*n*-hexane:EtOAc 6:4).

**mp** = 55–58 °C

**$^1\text{H}$  NMR** (400 MHz, Acetone- $\text{d}_6$ )  $\delta$ : 8.45 (brs, 1H, NH), 7.95 (m, 2H, Ph H-2,6), 7.55 (m, 1H, Ph H-4), 7.48 (m, 2H, Ph H-3,5), 4.80 (d,  $J$  = 6.6 Hz, 2H,  $\text{CH}_2$ ).

**$^{13}\text{C}$  NMR** (100 MHz, Acetone- $\text{d}_6$ )  $\delta$ : 167.9 (C=O), 135.4 (Ph C-1), 132.4 (Ph C-4), 129.3 (Ph C-3,5), 128.2 (Ph C-2,6), 72.2 ( $\text{CH}_2$ ).

**$^{15}\text{N}$  NMR** (40 MHz, Acetone- $\text{d}_6$ )  $\delta$ : -265.3 (NH).

**HRMS** (ESI),  $m/z$ : calcd. for  $\text{C}_9\text{H}_9\text{D}_2\text{NNaO}_2^+$ : 190.0808  $[\text{M} + \text{Na}]^+$ ; found: 190.0806.

#### ***N*-(methoxymethyl)-4-biphenylcarboxamide (**57**)**

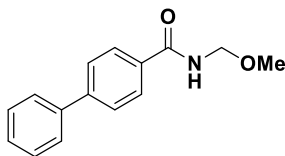

*N*-(methoxymethyl)-4-(tributylstannyl)benzamide **34** (0.60 mmol, 0.278 g, 1.0 equiv) was dissolved in dry DMF (5 mL) and to this solution were progressively added bromobenzene (0.60 mmol, 0.09 g, 0.06 mL, 1.0 equiv),  $\text{PdCl}_2$  (0.01 mmol, 0.002 g, 0.02 equiv),  $\text{P}(t\text{-Bu})_3$  (0.03 mmol, 0.006 g, 0.007 mL, 0.05 equiv), CuI (0.024 mmol, 0.005 g, 0.04 equiv) and CsF (1.2 mmol, 0.182 mg, 2.0 equiv).<sup>[14]</sup> The mixture was heated at 60 °C for 24 h and, after cooling to rt, diethyl ether (10 mL) was added before flushing upon a plug of Celite. Water (1 mL) was added and the organic phase was rapidly extracted, dried over anhydrous sodium sulfate and the

solvent was removed under reduced pressure. The obtained crude was purified on silica gel using *n*-hexane: ethyl acetate (6:4 v/v) as the mobile phase, giving compound **57** in 65% yield (0.094 g) as a white solid.

**mp** = 134 °C

**<sup>1</sup>H NMR** (400 MHz, Acetone-*d*<sub>6</sub>)  $\delta$ : 8.52 (brs, 1H, NH), 8.05 (m, 2H, Ph H-3,5), 7.78 (m, 2H, Ph H-2,6), 7.72 (m, 2H, Ph H-2',6'), 7.50 (m, 2H, Ph H-3',5'), 7.41 (m, 1H, Ph H-4'), 4.83 (d, *J* = 6.6 Hz, 2H, CH<sub>2</sub>), 3.32 (s, 3H, OCH<sub>3</sub>).

**<sup>13</sup>C NMR** (100 MHz, Acetone-*d*<sub>6</sub>)  $\delta$ : 167.6 (C=O), 144.9 (Ph C-1), 140.8 (Ph C-1'), 134.2 (Ph C-4), 129.9 (Ph C-3',5'), 128.88 (Ph C-4'), 128.86 (Ph C-3,5), 127.9 (Ph C-2',6'), 127.7 (Ph C-2,6), 72.3 (CH<sub>2</sub>), 55.9 (OCH<sub>3</sub>).

**<sup>15</sup>N NMR** (40 MHz, Acetone-*d*<sub>6</sub>)  $\delta$ : -265.3 (NH).

**HRMS** (ESI), *m/z*: calcd. for C<sub>15</sub>H<sub>15</sub>NNaO<sub>2</sub><sup>+</sup>: 264.0995 [M + Na]<sup>+</sup>; found: 264.0989.

#### ***N*-(methoxymethyl)-4-(4-morpholinyl)benzamide (**58**)**

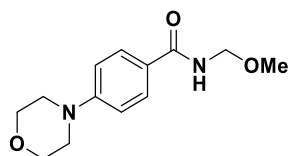

To the solution of 4-hydroxy-*N*-(methoxymethyl)benzamide (**28**, 0.77 mmol, 0.139 g, 1.0 equiv) in DCM (2 mL), TsCl (0.08 mmol, 0.015 g, 1.05 equiv) and NEt<sub>3</sub> (0.92 mmol, 0.093 g, 0.13 mL, 1.2 equiv) was added at rt and stirred for 3 h. After that the reaction was quenched with water and the organic phase extracted, dried over anhydrous sodium sulfate and the solvent was removed under reduced pressure. The so obtained intermediate *O*-Ts was directly used in the following step. Thus, it was dissolved in dry *t*-BuOH (5 mL) and consecutively were added Pd(OAc)<sub>2</sub> (0.039 mmol, 0.009 g, 0.05 equiv), K<sub>2</sub>CO<sub>3</sub> (1.9 mmol, 0.262 g, 2.5 equiv) and morpholine (1.2 mmol, 0.104 g, 0.1 mL, 1.6 equiv). After degassing with Ar (x 3) the resulting mixture was heated at 90 °C for 24 h and then cooled at rt and diluted with diethyl ether (10 mL). The mixture was flushed upon a plug of Celite and washed with water (3 mL). The extracted organic phase was dried over anhydrous sodium sulfate and the solvent was removed under reduced pressure. The obtained crude was purified on silica gel using DCM:MeOH (98:2 v/v) as the mobile phase, giving compound **58** in 74% yield (0.142 g) as a yellow solid.

**mp** = 89-91 °C

**<sup>1</sup>H NMR** (400 MHz, Acetone-*d*<sub>6</sub>)  $\delta$ : 8.22 (brs, 1H, NH), 7.86 (m, 2H, Ph H-2,6), 6.99 (m, 2H, Ph H-3,5), 4.77 (d, *J* = 6.7 Hz, 2H, CH<sub>2</sub>), 3.78 (m, 4H, morpholine H-2,6), 3.27 (s, 3H, OCH<sub>3</sub>), 3.26 (m, 4H, morpholine H-3,5).

**<sup>13</sup>C NMR** (100 MHz, Acetone-*d*<sub>6</sub>)  $\delta$ : 167.5 (C=O), 154.6 (Ph C-4), 129.6 (Ph H-2,6), 125.1 (Ph C-1), 114.6 (Ph C-3,5), 72.2 (CH<sub>2</sub>), 67.2 (morpholine C-2,6), 55.4 (OCH<sub>3</sub>), 48.7 (morpholine C-3,5).

**<sup>15</sup>N NMR** (40 MHz, Acetone-*d*<sub>6</sub>)  $\delta$ : -312.7 (N), -268.0 (NH).

**HRMS** (ESI), *m/z*: calcd. for C<sub>13</sub>H<sub>18</sub>N<sub>2</sub>NaO<sub>3</sub><sup>+</sup>: 273.1210 [M + Na]<sup>+</sup>; found: 273.1215.

**(2E)-N-(methoxymethyl)-4-methyl-3-phenyl-2-hexenamide (60)**

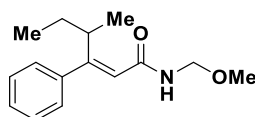

By following the general procedure, starting from *N*-methoxy-*N*-methyl-3-phenylpropiolamide (**59**, 0.189 g, 1.0 mmol, 1.0 equiv), PMDTA (0.554 g, 0.66 mL, 3.2 mmol, 3.2 equiv) and *s*-BuLi (2.2 M in Et<sub>2</sub>O, 1.46 mL, 3.2 mmol, 3.2 equiv) in dry 2-MeTHF (3 mL), compound **60** was obtained in 61% yield (0.151 g) as a yellow solid after purification by column chromatography on silica gel (*n*-hexane:EtOAc 7:3).

**mp** = 52-55 °C

**<sup>1</sup>H NMR** (400 MHz, C<sub>6</sub>D<sub>6</sub>)  $\delta$ : 7.17 (m, 4H, Ph H-2,3,5,6), 7.07 (m, 1H, Ph H-4), 6.65 (d, *J* = 2.4 Hz, 1H, C=CH), 5.77 (brs, 1H, NH), 4.57 (d, *J* = 6.9 Hz, 2H, CH<sub>2</sub>OCH<sub>3</sub>), 3.22 (s, 3H, OCH<sub>3</sub>), 2.85 (m, 1H, CHCH<sub>3</sub>), 1.90 (m, 1H, CH<sub>2</sub>), 1.58 (m, 1H, CH<sub>2</sub>), 1.34 (d, *J* = 6.9 Hz, 3H, CH<sub>3</sub>), 0.82 (t, *J* = 7.4 Hz, 3H, CH<sub>3</sub>).

**<sup>13</sup>C NMR** (100 MHz, C<sub>6</sub>D<sub>6</sub>)  $\delta$ : 170.2 (C=O), 145.1 (C=CH), 131.0 (C=CH), 131.0 (Ph C-1), 129.1 (Ph C-2,6), 128.7 (Ph C-3,5), 127.7 (Ph C-4), 71.2 (CH<sub>2</sub>OCH<sub>3</sub>), 55.9 (OCH<sub>3</sub>), 36.0 (CHCH<sub>3</sub>), 28.5 (CH<sub>2</sub>CH<sub>3</sub>), 20.0 (CHCH<sub>3</sub>), 12.9 (CH<sub>2</sub>CH<sub>3</sub>).

**<sup>15</sup>N NMR** (40 MHz, C<sub>6</sub>D<sub>6</sub>)  $\delta$ : -260.3 (NH).

**HRMS** (ESI), *m/z*: calcd. for C<sub>15</sub>H<sub>22</sub>NO<sub>2</sub><sup>+</sup>: 248.1645 [M + H]<sup>+</sup>; found: 248.1652.

***N*-(methoxymethyl)-*N*,3-dimethylbenzamide (61)**

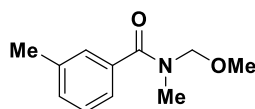

To the solution of *N*-(methoxymethyl)-3-methylbenzamide **14** (0.66 mmol, 0.118 g, 1 equiv) and Cs<sub>2</sub>CO<sub>3</sub> (0.86 mmol, 0.280 g, 1.3 equiv) in MeCN (2 mL), MeI (0.79 mmol, 0.112 g, 0.05 mL, 1.2 equiv) was added and reaction was stirred overnight before quenching with NH<sub>4</sub>Cl<sub>(aq.)</sub>. The reaction mixture was extracted 3x with EtOAc, dried over Na<sub>2</sub>SO<sub>4</sub> and the solvent was removed under reduced pressure. Compound **561** was obtained in 95% (0.121 g) as yellow oil.

**<sup>1</sup>H NMR** (400 MHz, Acetone-d<sub>6</sub>)  $\delta$ : 7.31-7.24 (m, 4H, Ph), 4.61 (brs, 2H, CH<sub>2</sub>), 3.16 (brs, 3H, OCH<sub>3</sub>), 3.02 (brs, 3H, CH<sub>3</sub>), 2.82 (s, 3H, Ar-CH<sub>3</sub>).

**<sup>13</sup>C NMR** (100 MHz, Acetone-d<sub>6</sub>)  $\delta$ : 172.5 (C=O), 138.8 (Ph C-3), 135.4 (Ph C-1), 133.0 (Ph C-4), 129.2 (Ph C-5), 128.8 (Ph C-2), 125.3 (Ph C-6), 83.1 (CH<sub>2</sub>), 55.2 (OCH<sub>3</sub>), 21.3 (Ar-CH<sub>3</sub>). The *N*-CH<sub>3</sub> signal is overlapped with the solvent residual peak at *ca.* 29.80 ppm.

**HRMS** (ESI), *m/z*: calcd. for C<sub>11</sub>H<sub>16</sub>NO<sub>2</sub><sup>+</sup>: 194.1176 [M + Na]<sup>+</sup>; found: 194.1156.

## Copies of NMR spectra

Copies of  $^1\text{H}$  and  $^{13}\text{C}$ -NMR spectra of *N*-alkyl-*N*-alkoxyamides used in Schemes 3 and 4 of the manuscript.

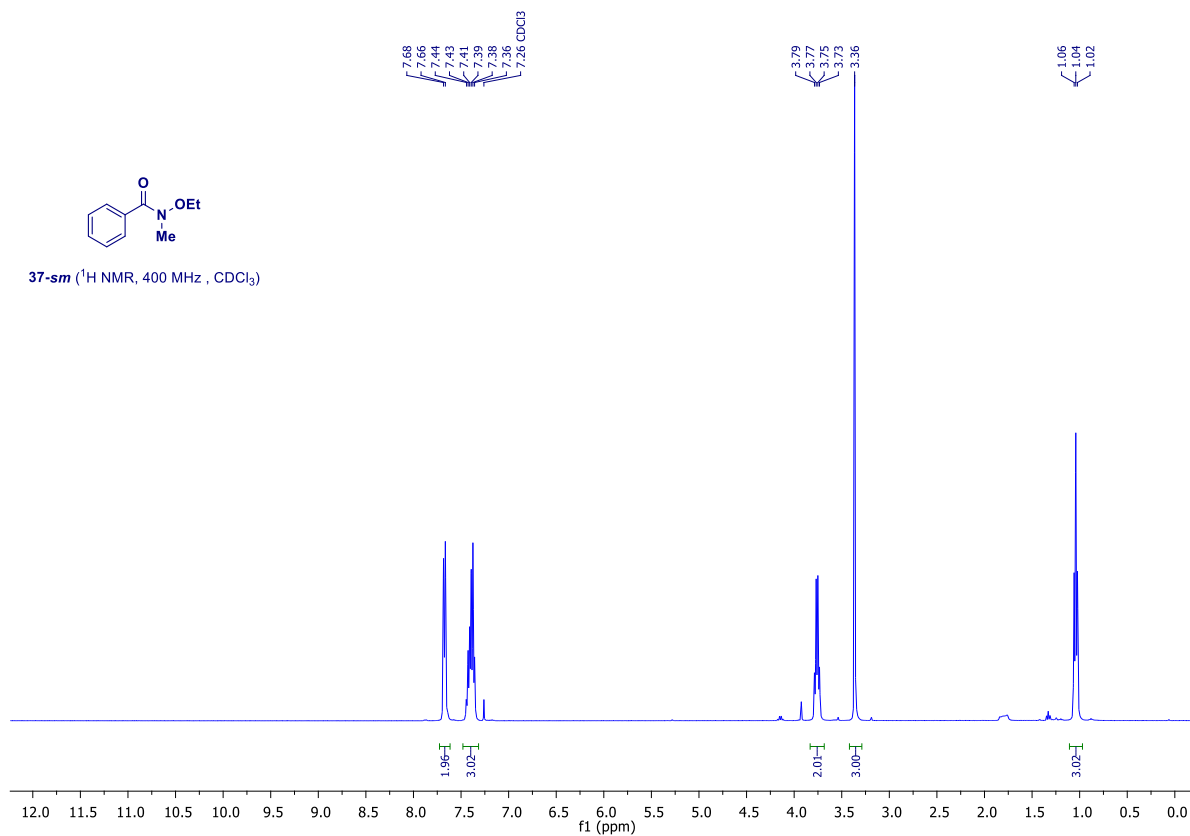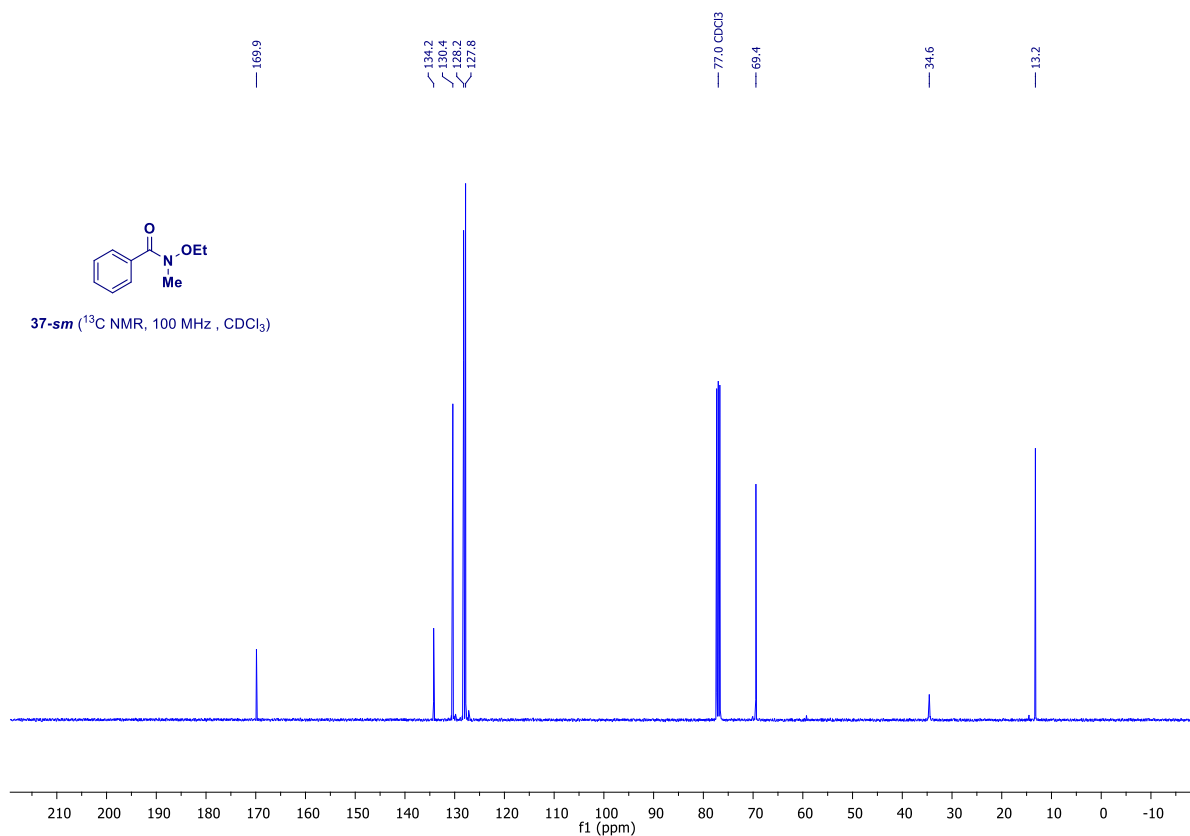

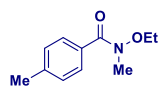

**38-sm** ( $^1\text{H}$  NMR, 200 MHz,  $\text{CDCl}_3$ )

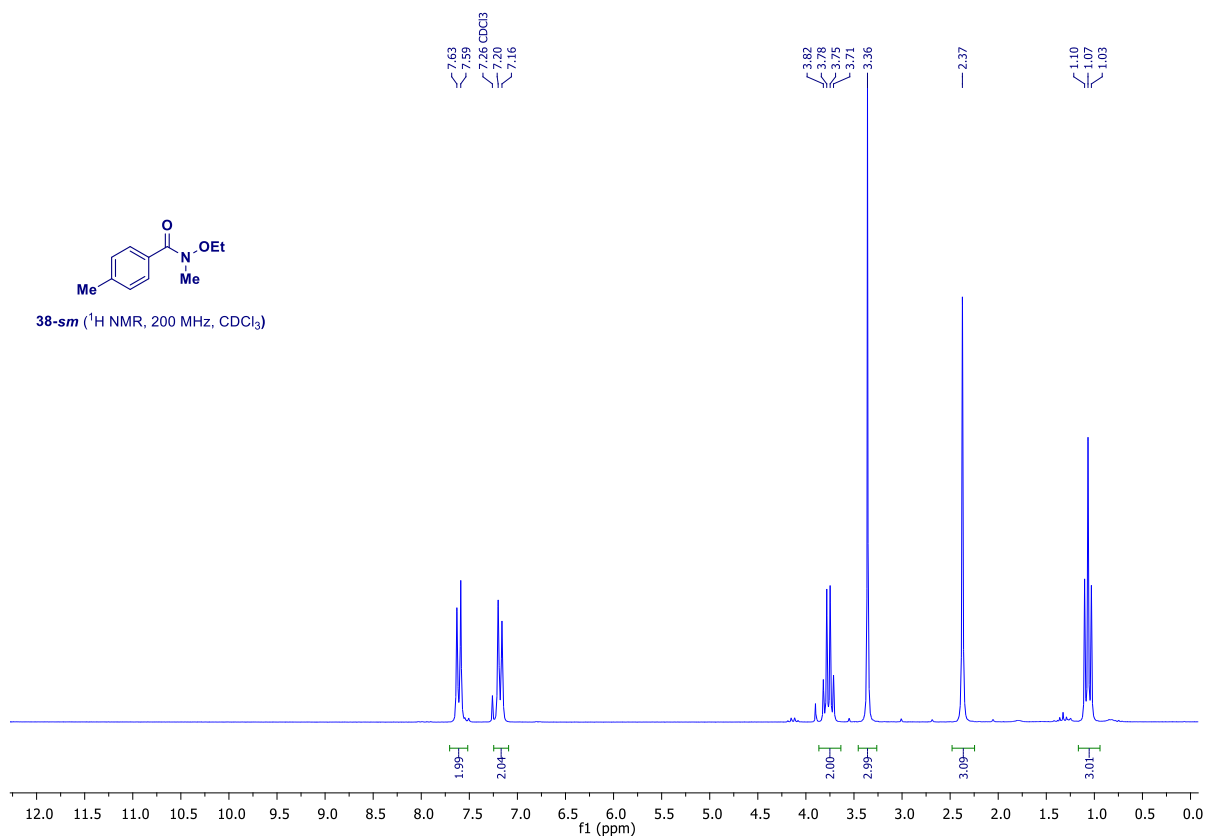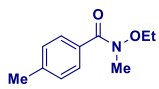

**38-sm** ( $^{13}\text{C}$  NMR, 50 MHz,  $\text{CDCl}_3$ )

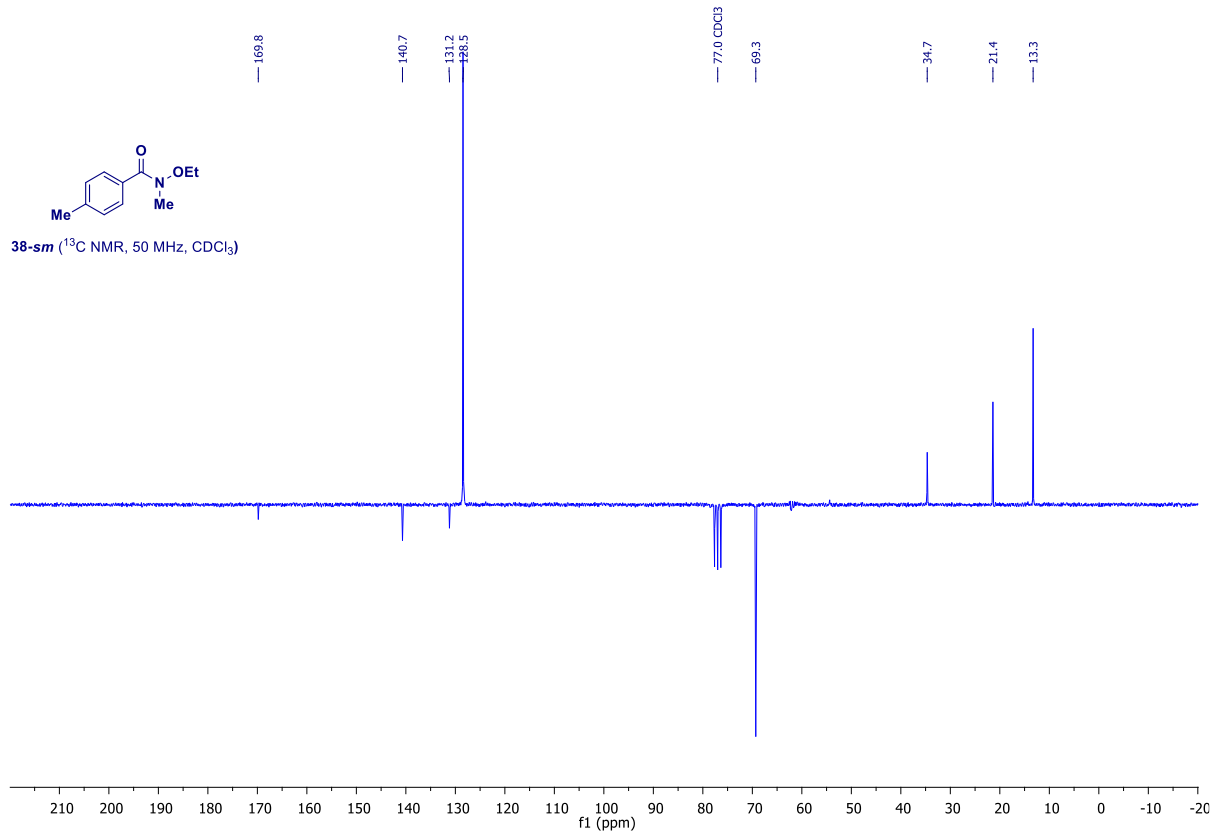

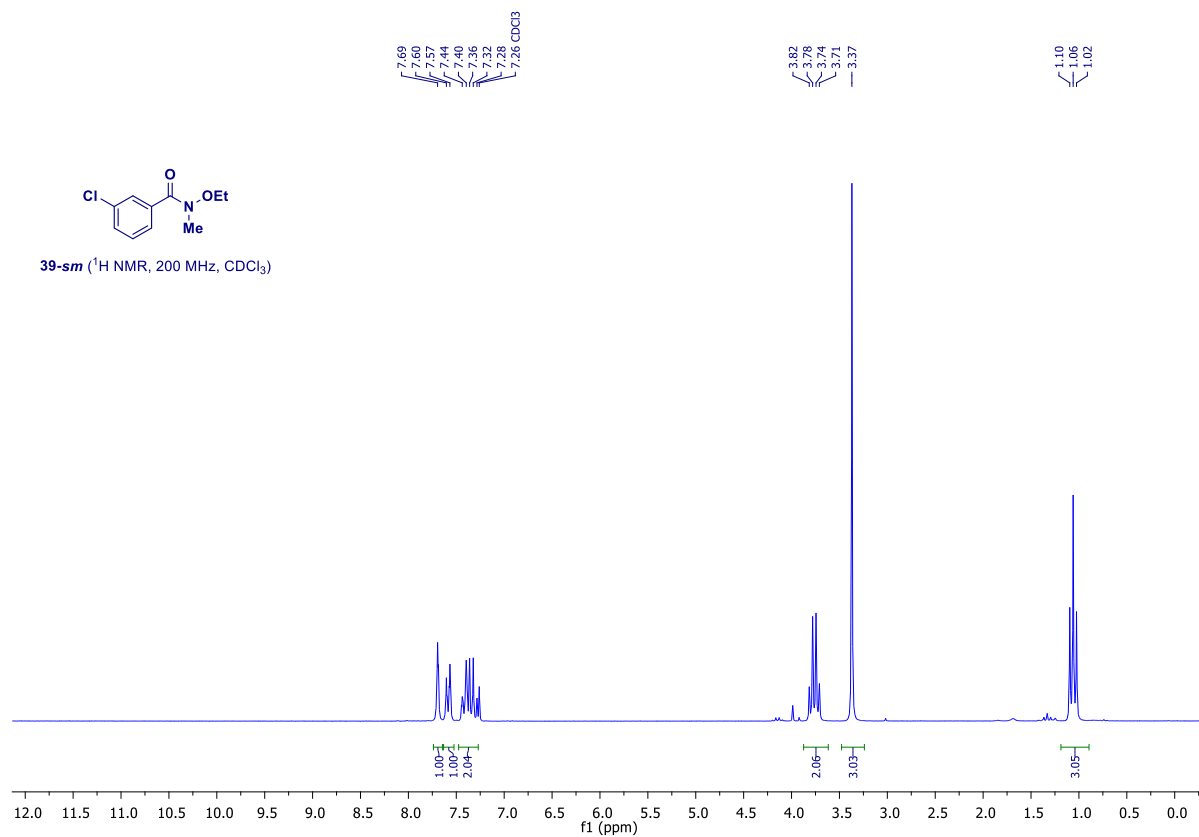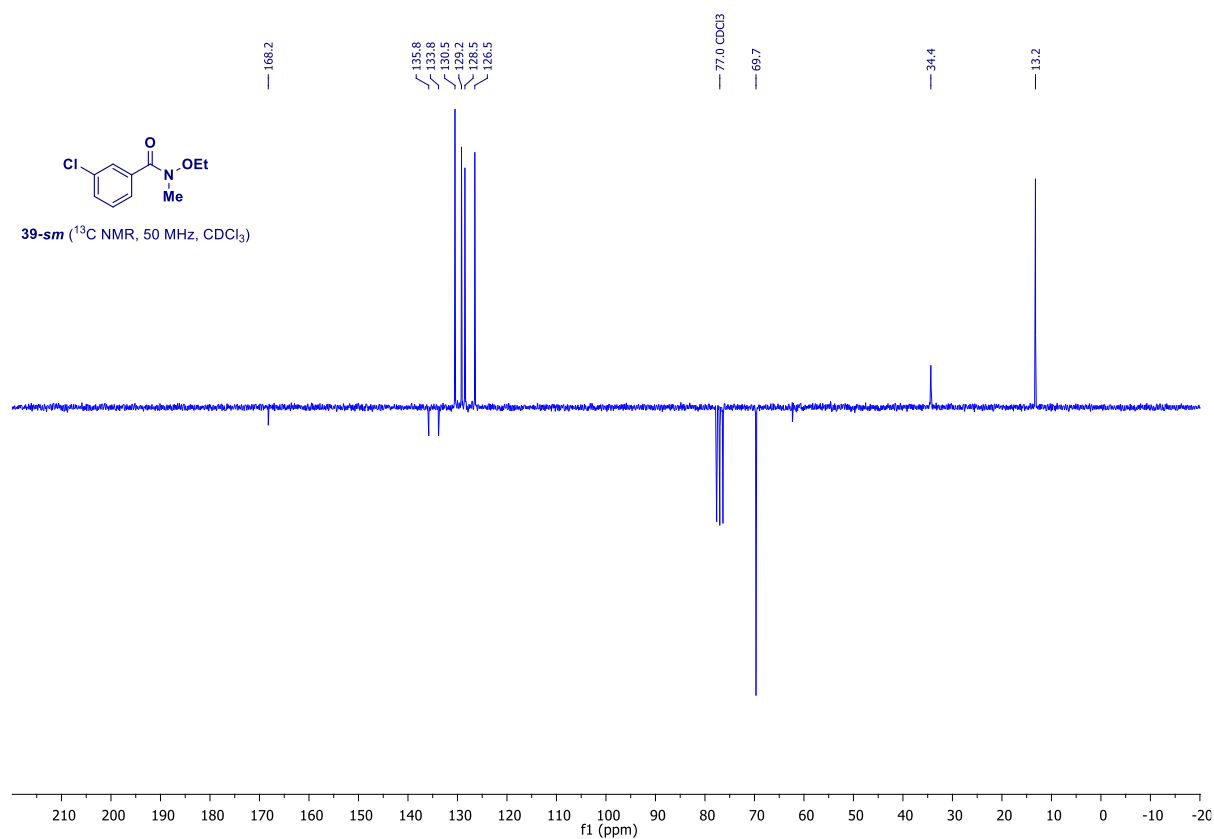

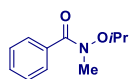

40-sm (<sup>1</sup>H NMR, 200 MHz, CDCl<sub>3</sub>)

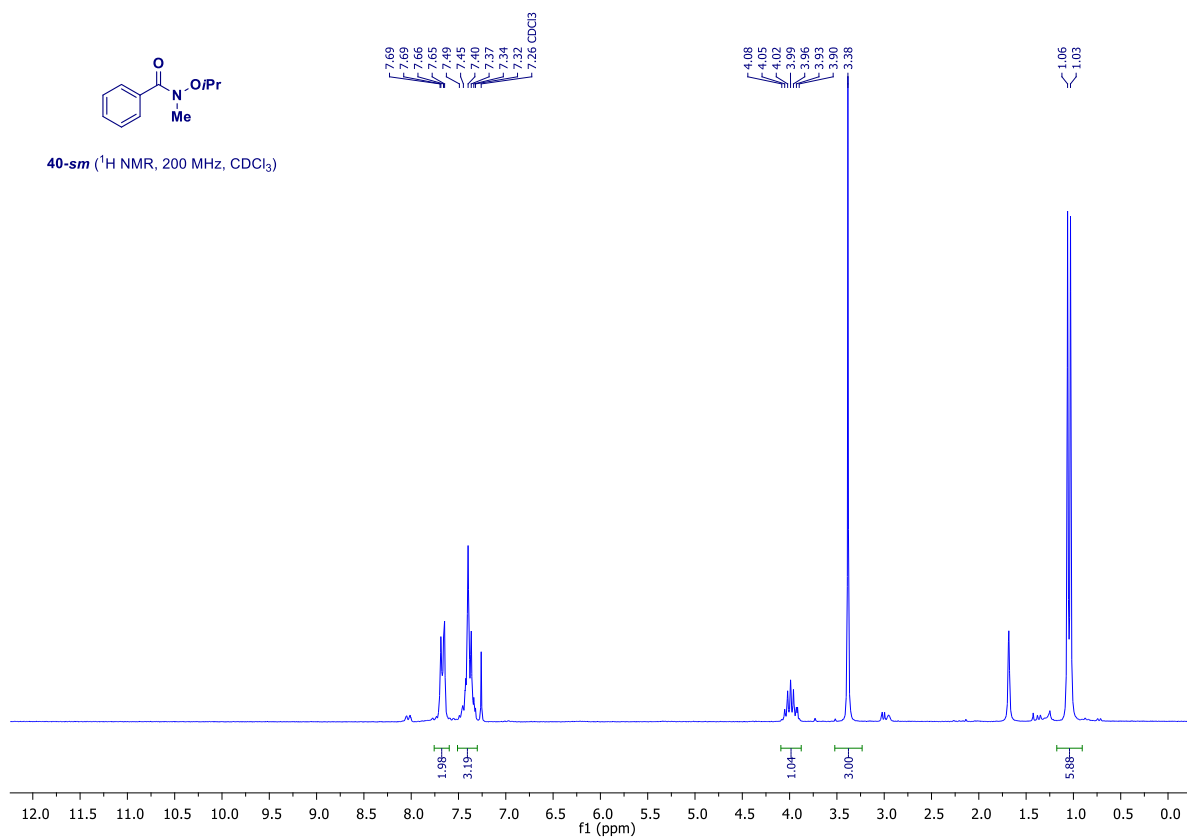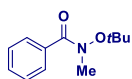

41-sm (<sup>1</sup>H NMR, 400 MHz, CDCl<sub>3</sub>)

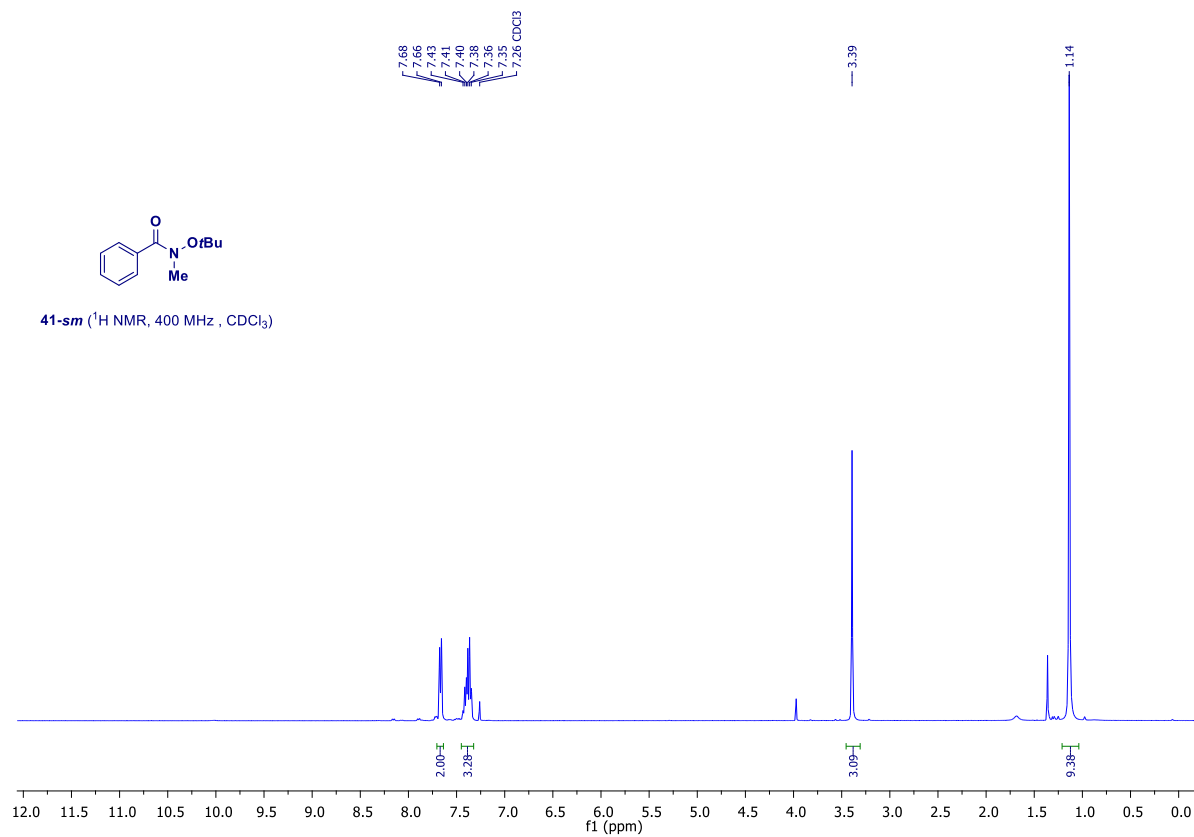

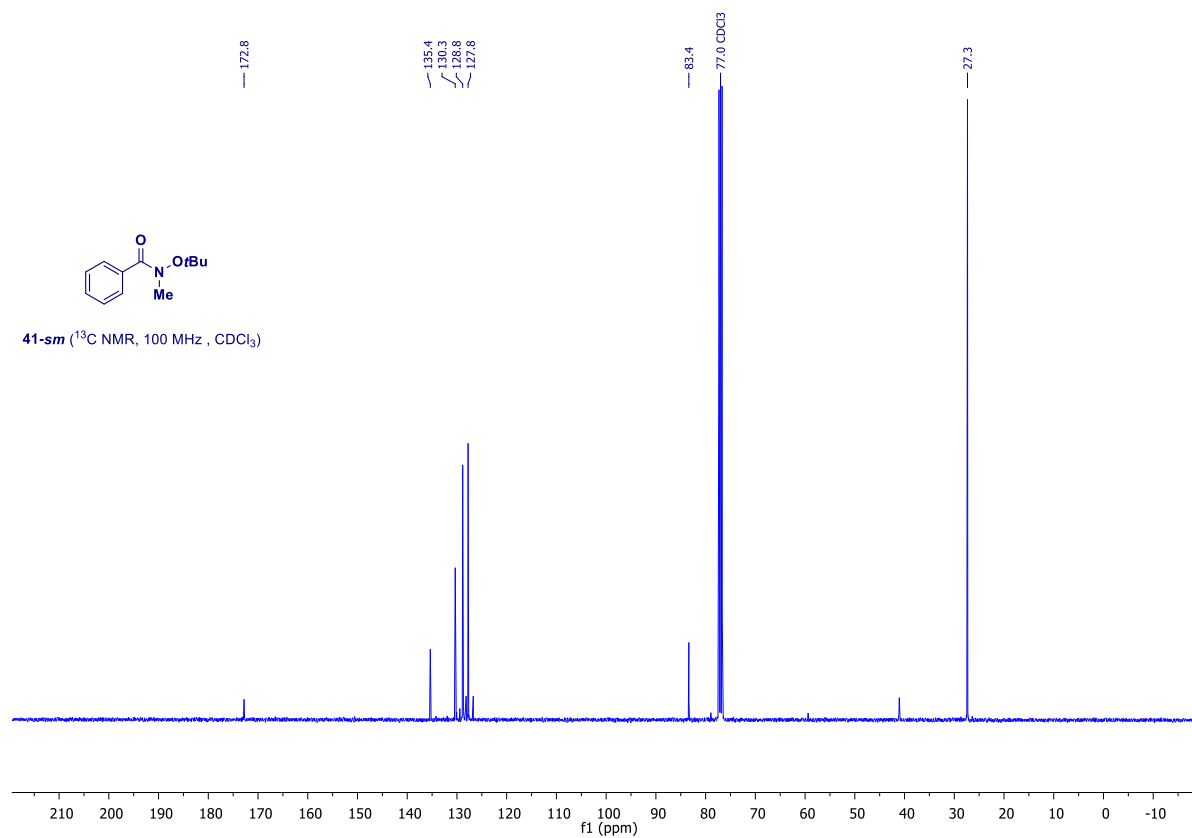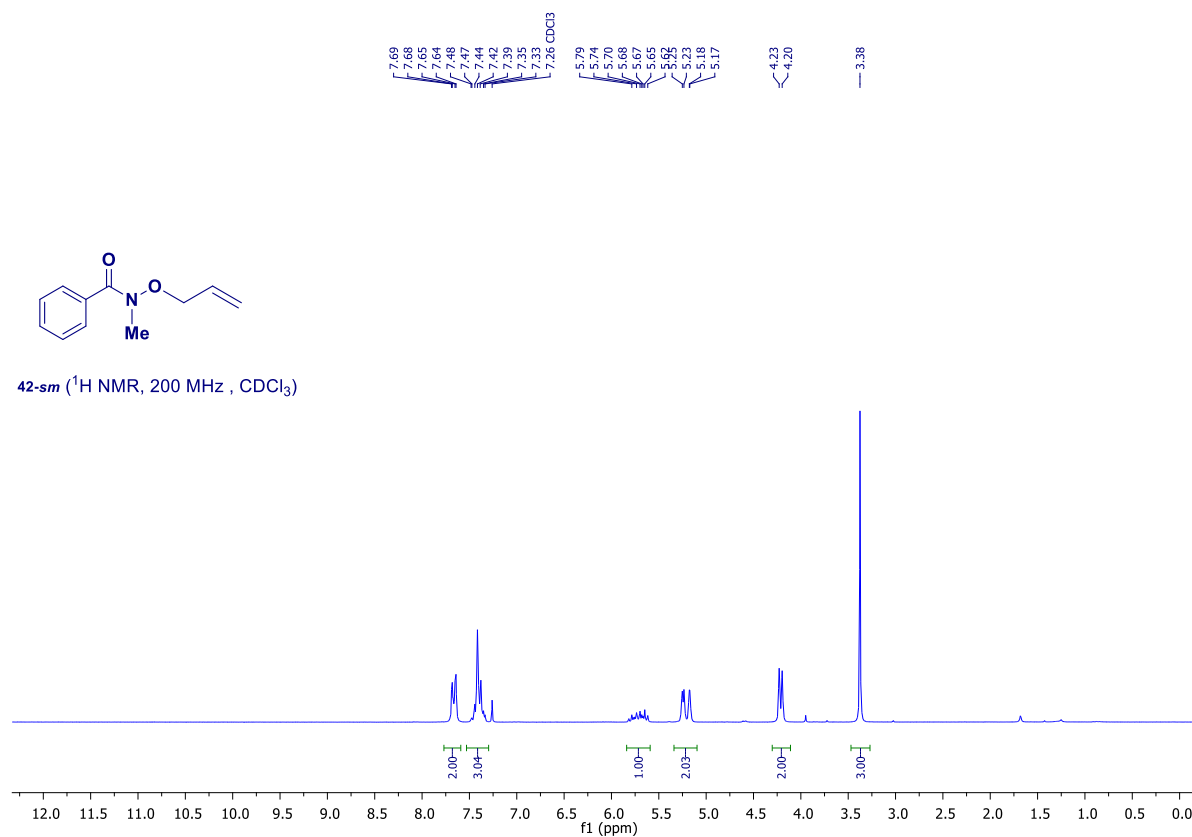

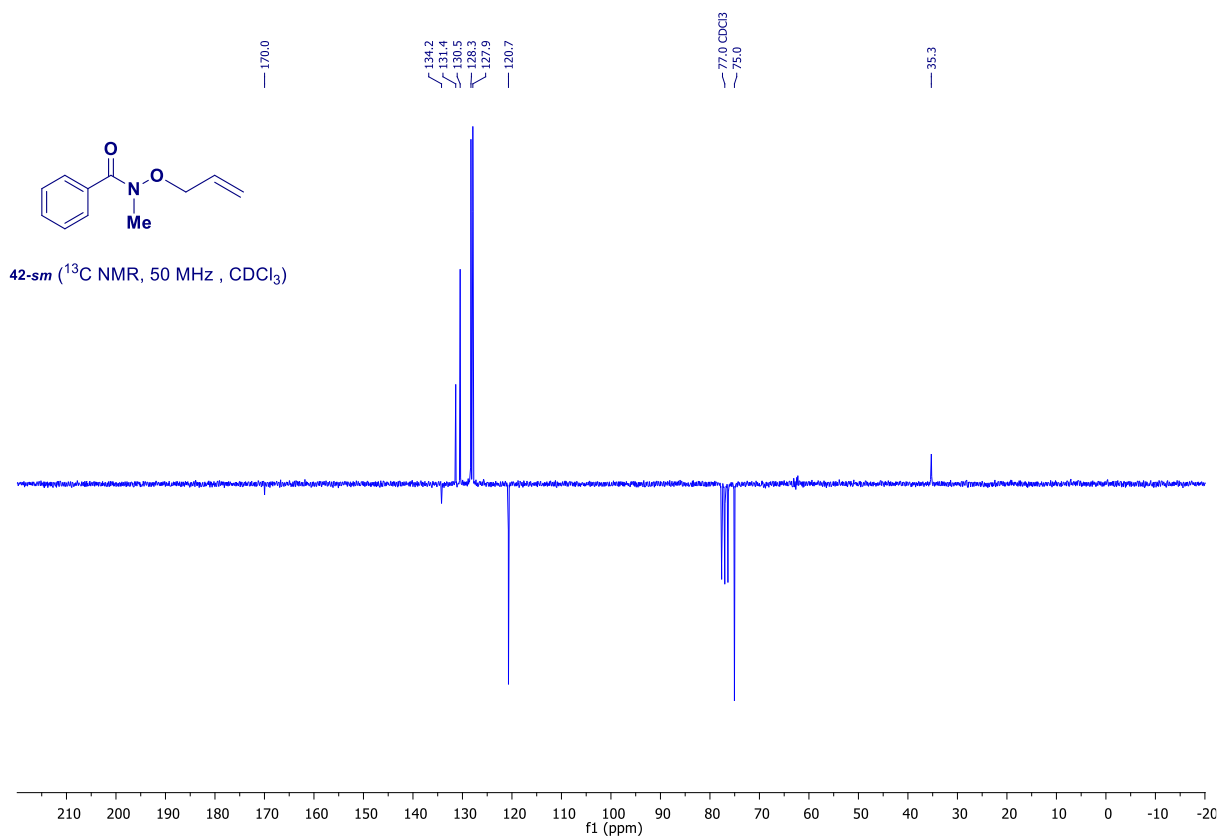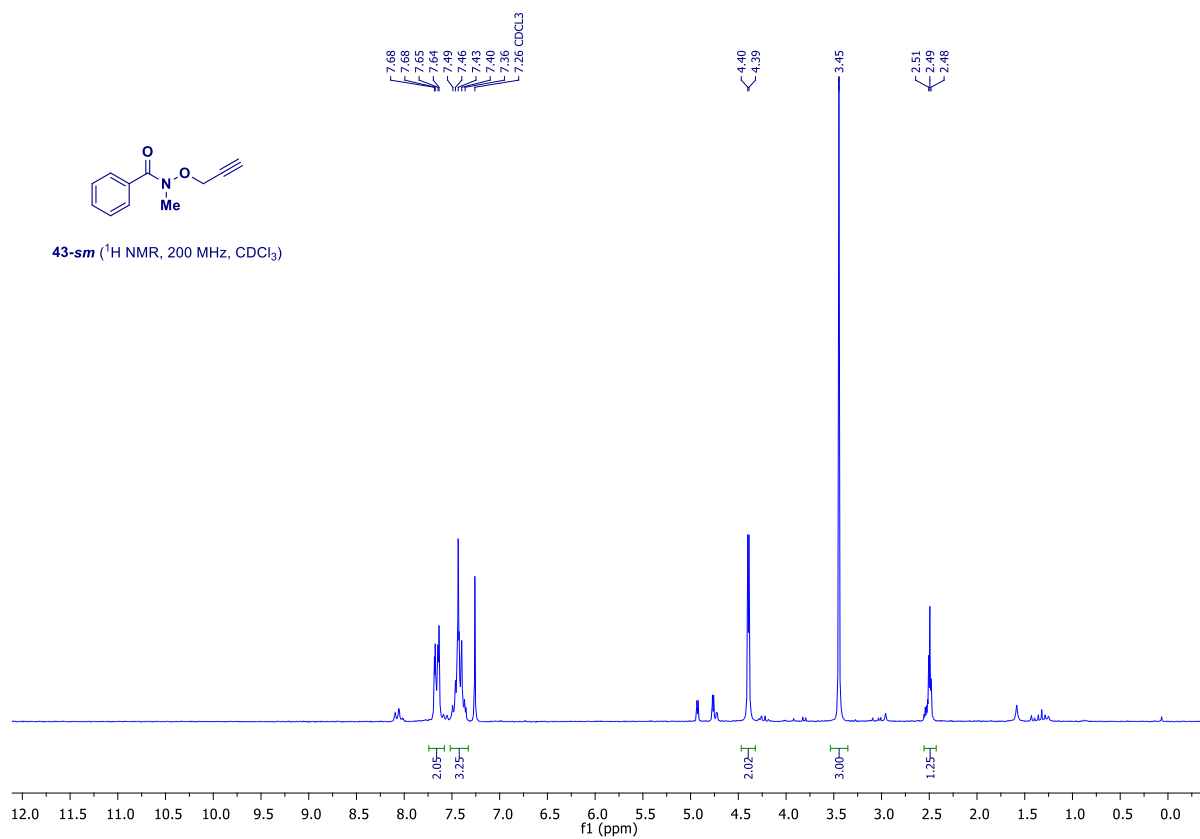

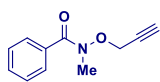

**43-sm** ( $^{13}\text{C}$  NMR, 50 MHz,  $\text{CDCl}_3$ )

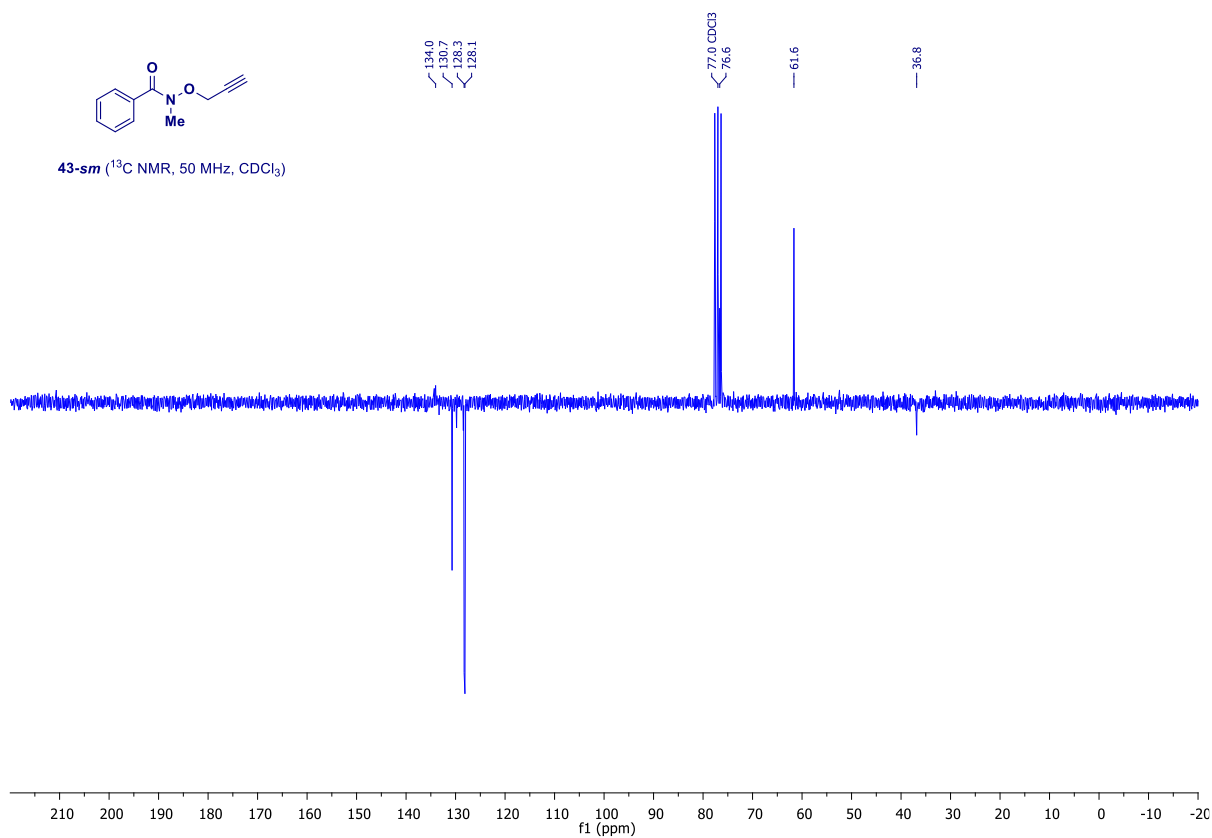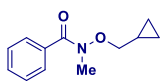

**44-sm** ( $^1\text{H}$  NMR, 200 MHz,  $\text{CDCl}_3$ )

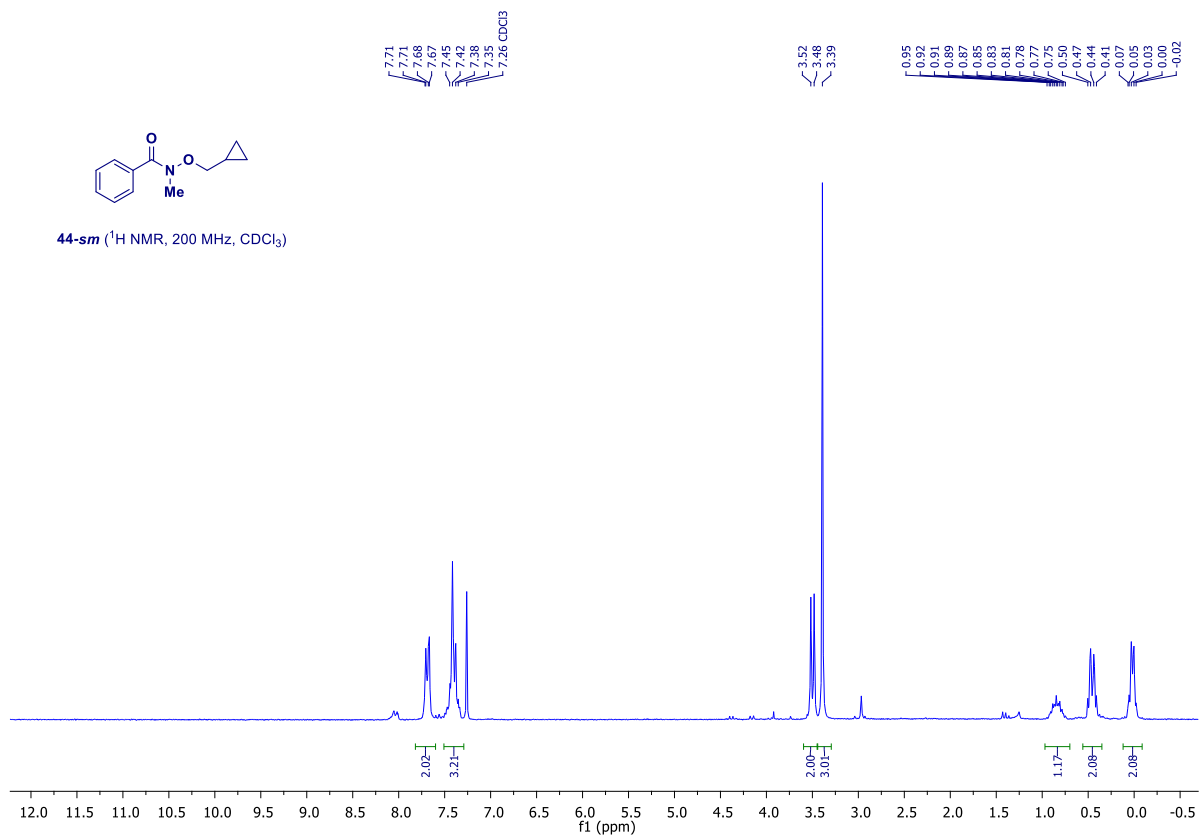

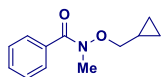

**44-sm** ( $^{13}\text{C}$  NMR, 50 MHz,  $\text{CDCl}_3$ )

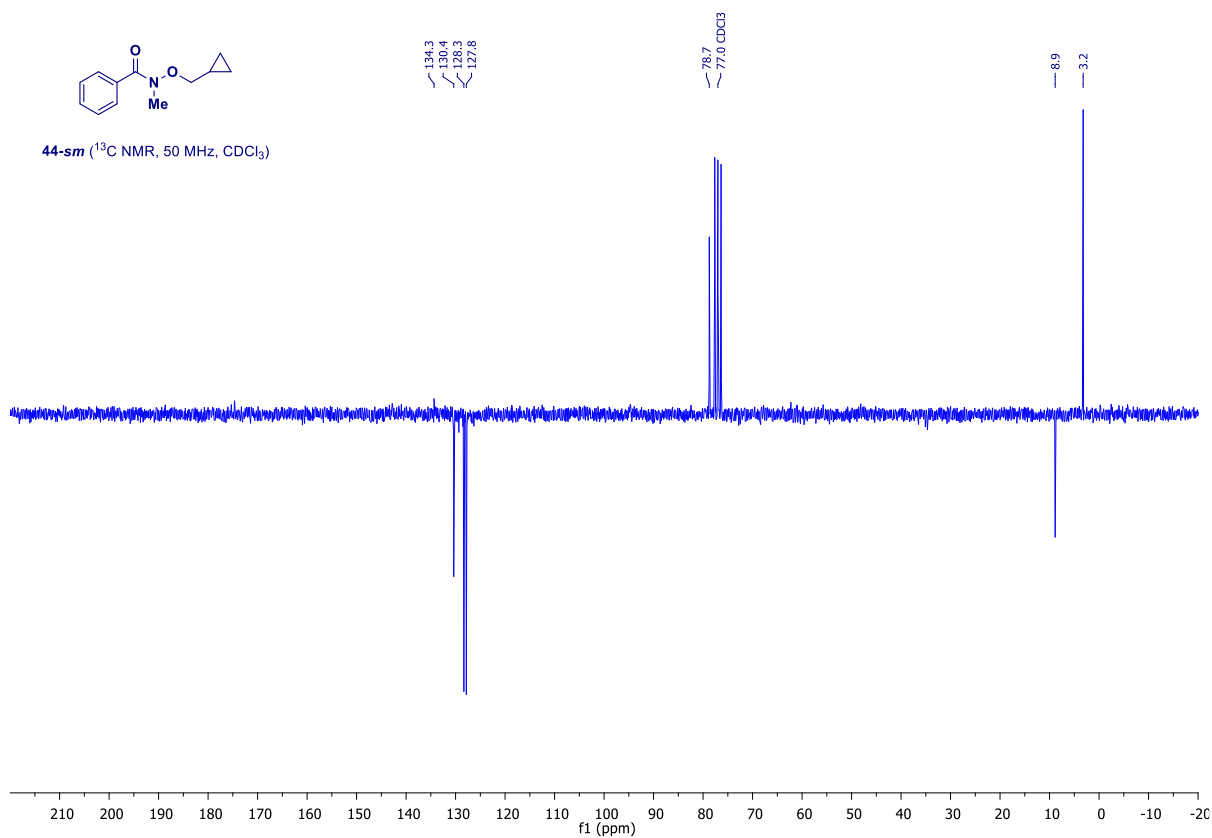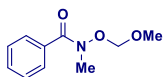

**45-sm** ( $^1\text{H}$  NMR, 200 MHz,  $\text{CDCl}_3$ )

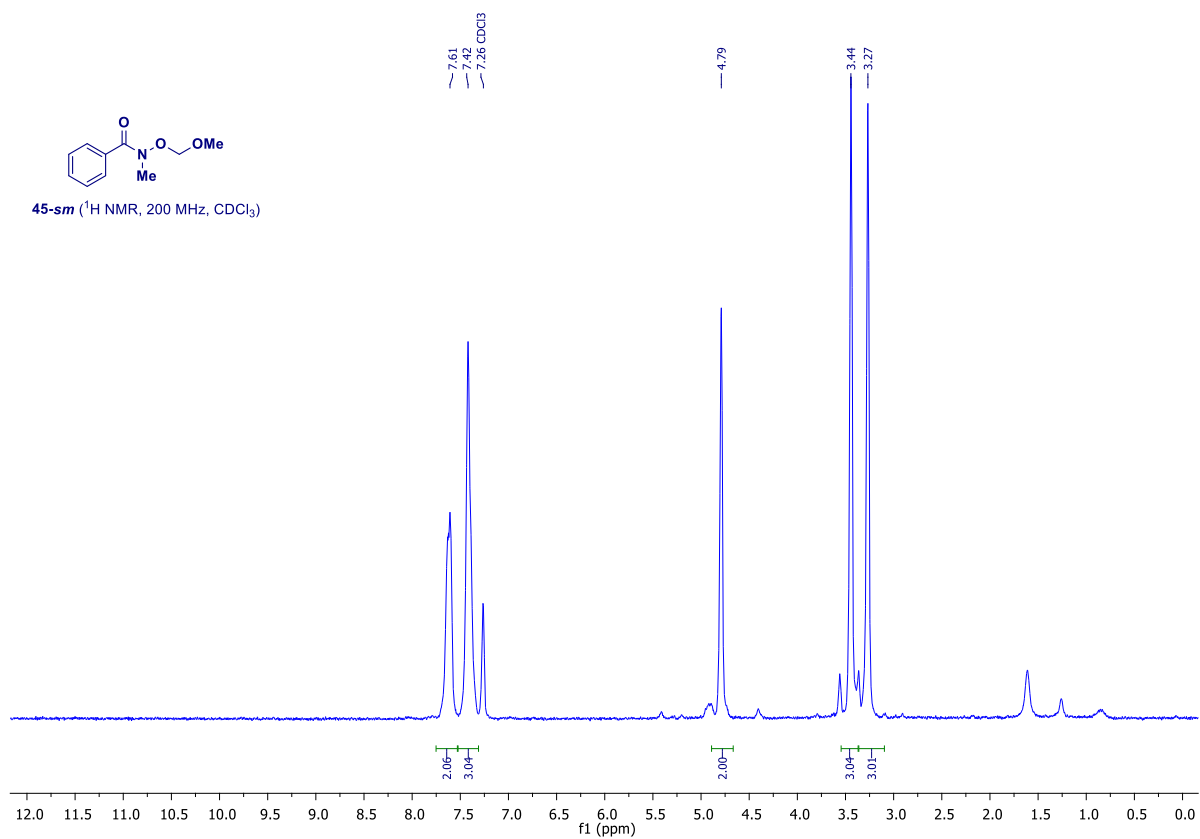

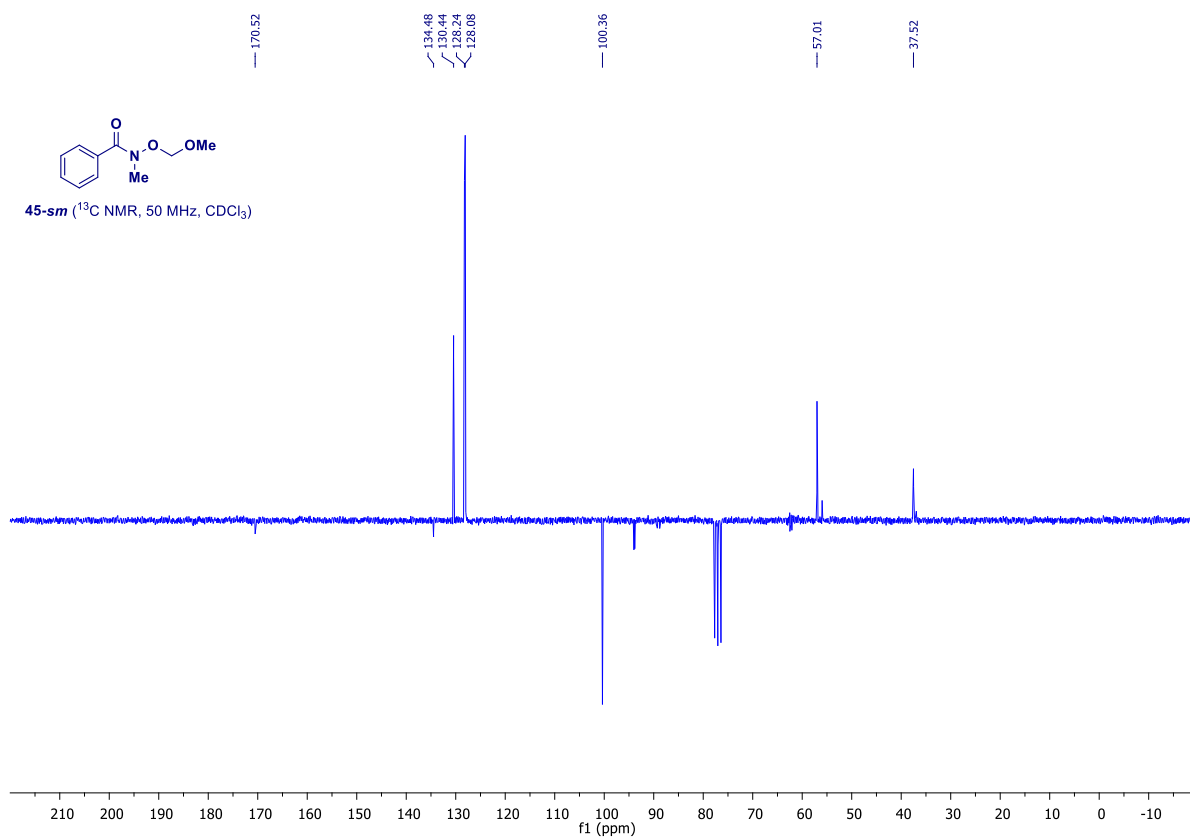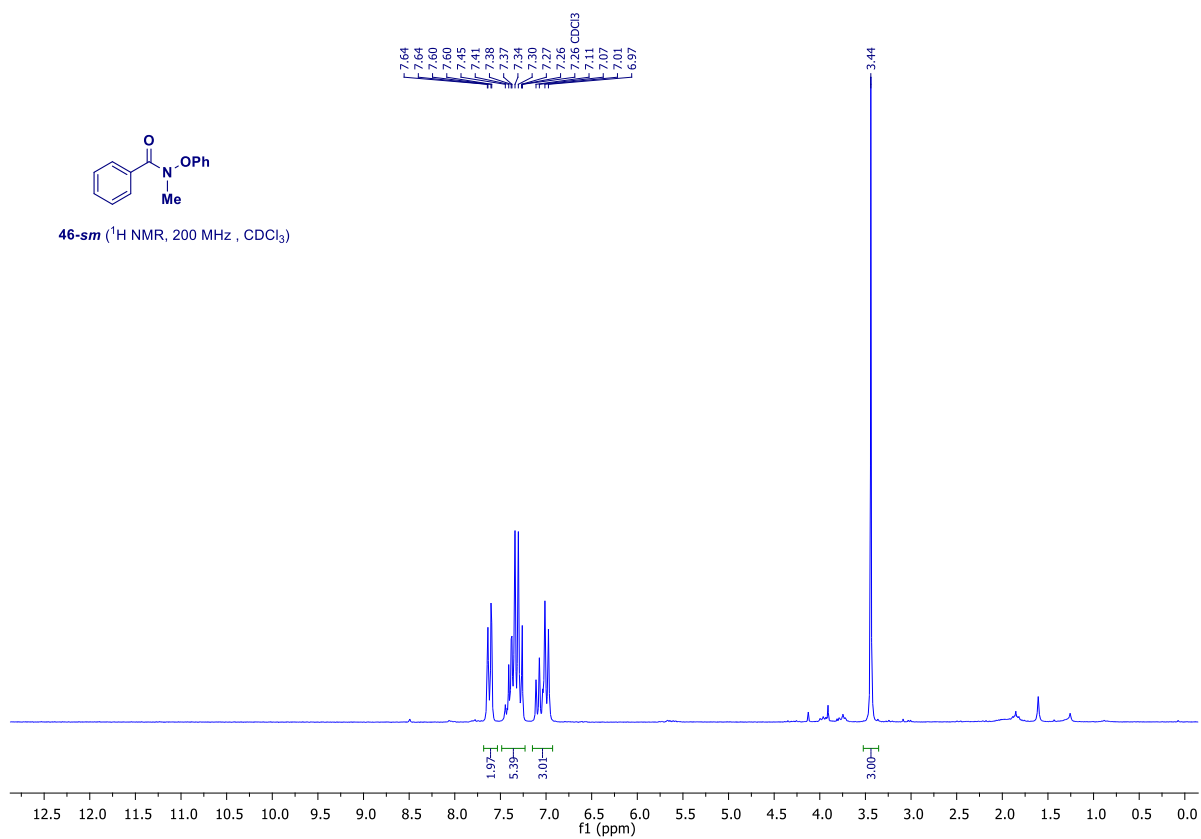

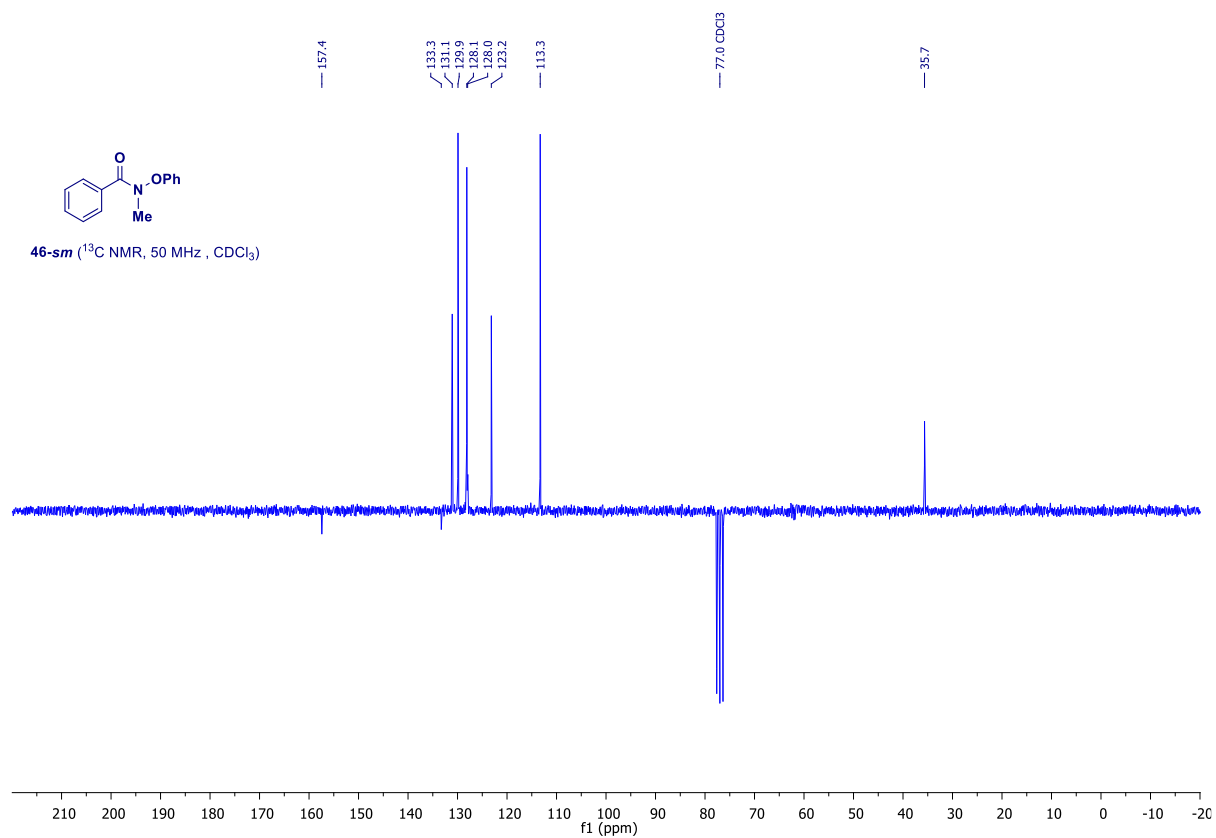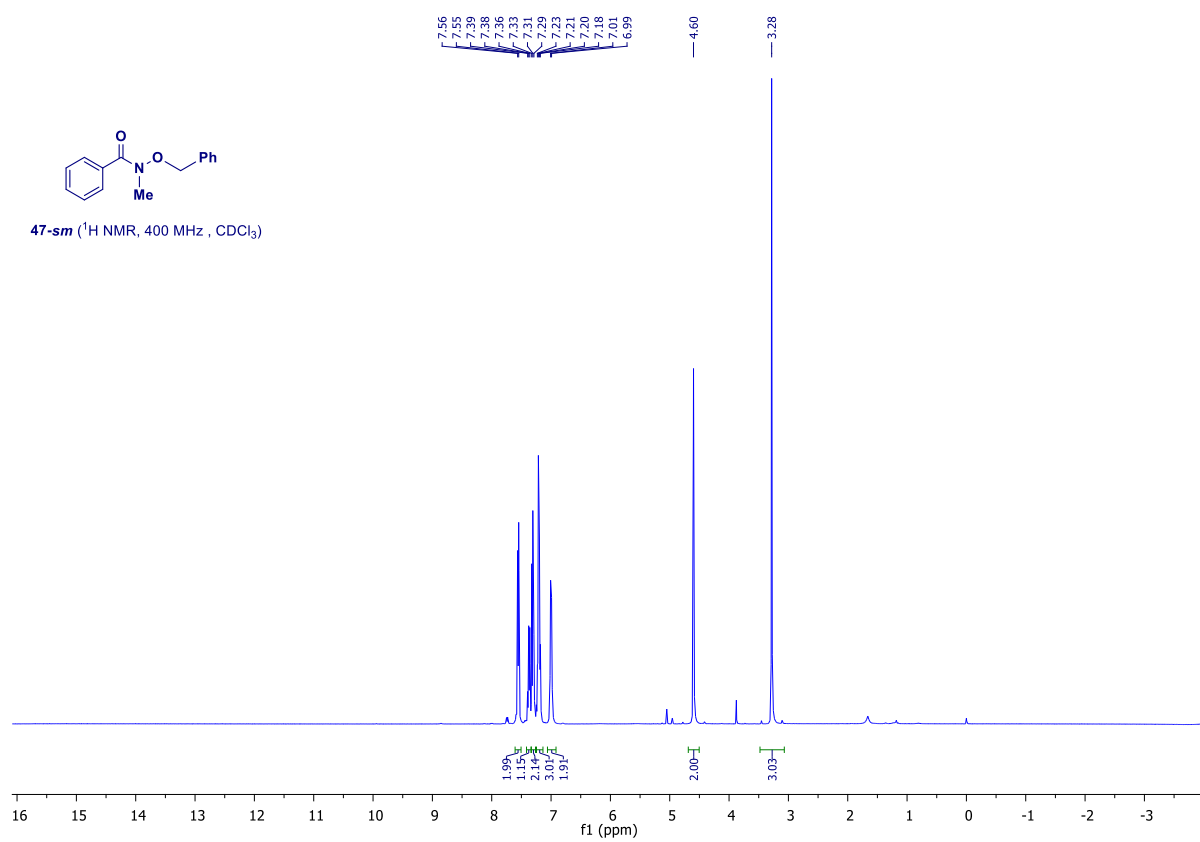

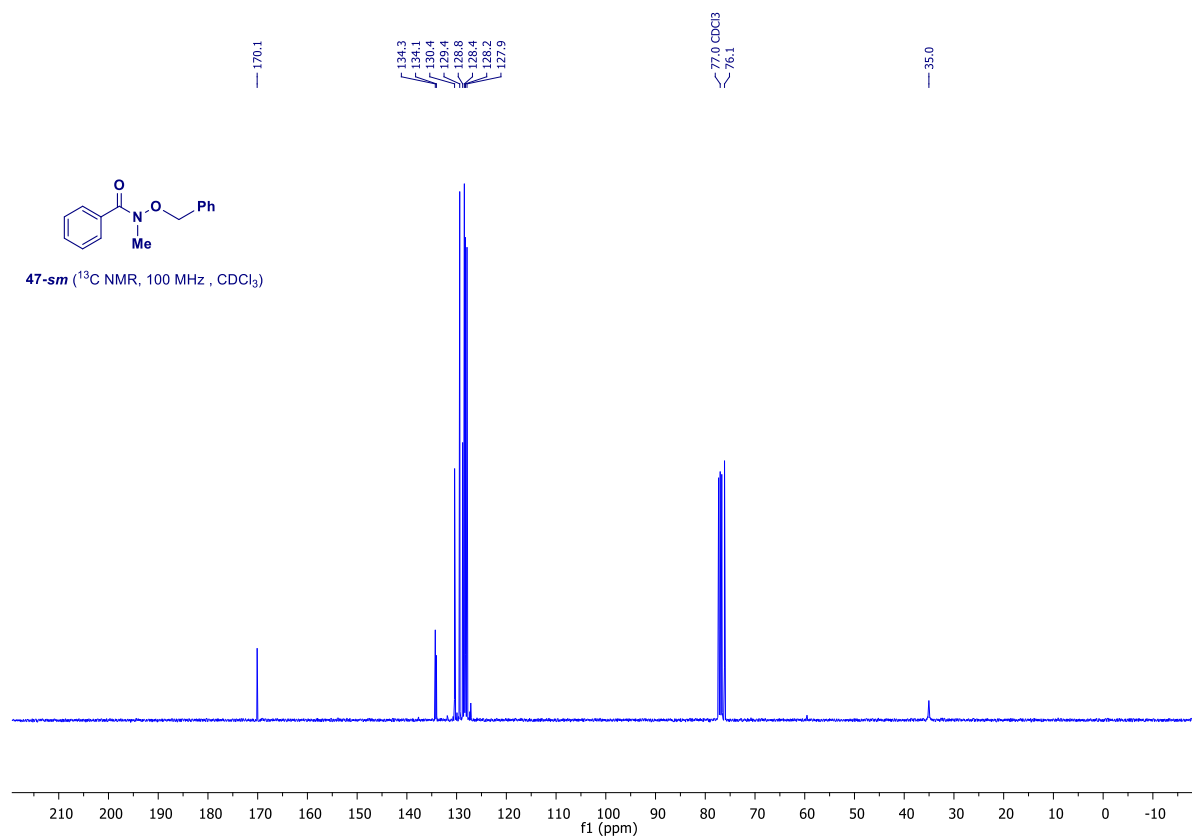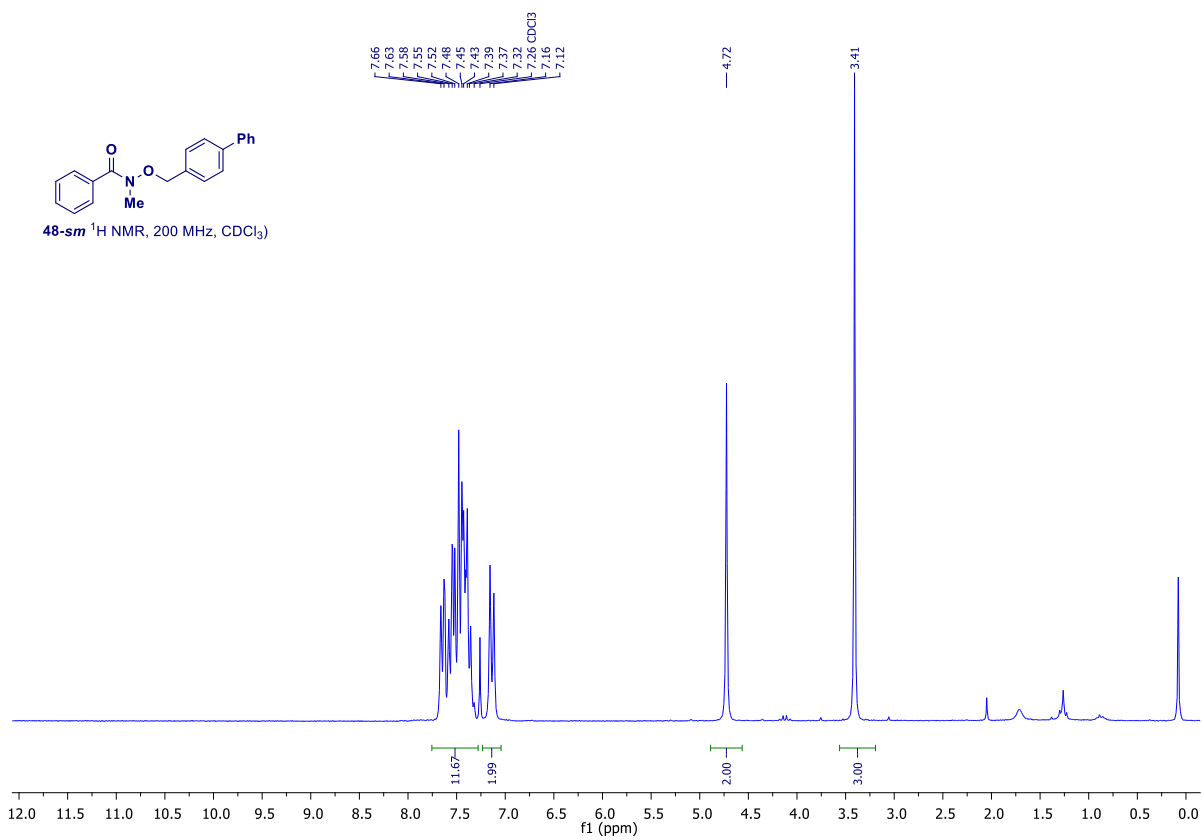

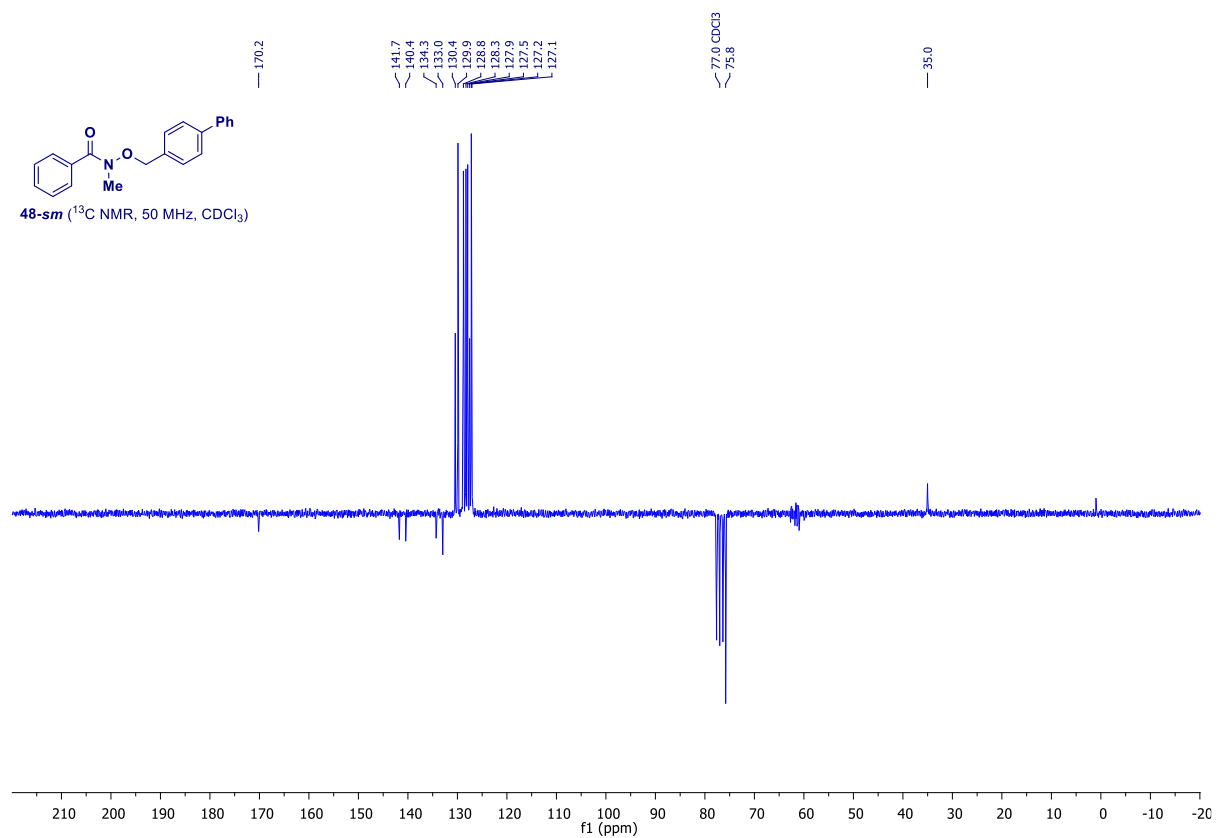

Copies of  $^1\text{H}$  and  $^{13}\text{C}$ -NMR spectra of *N*-acyl-*N,O*-acetals

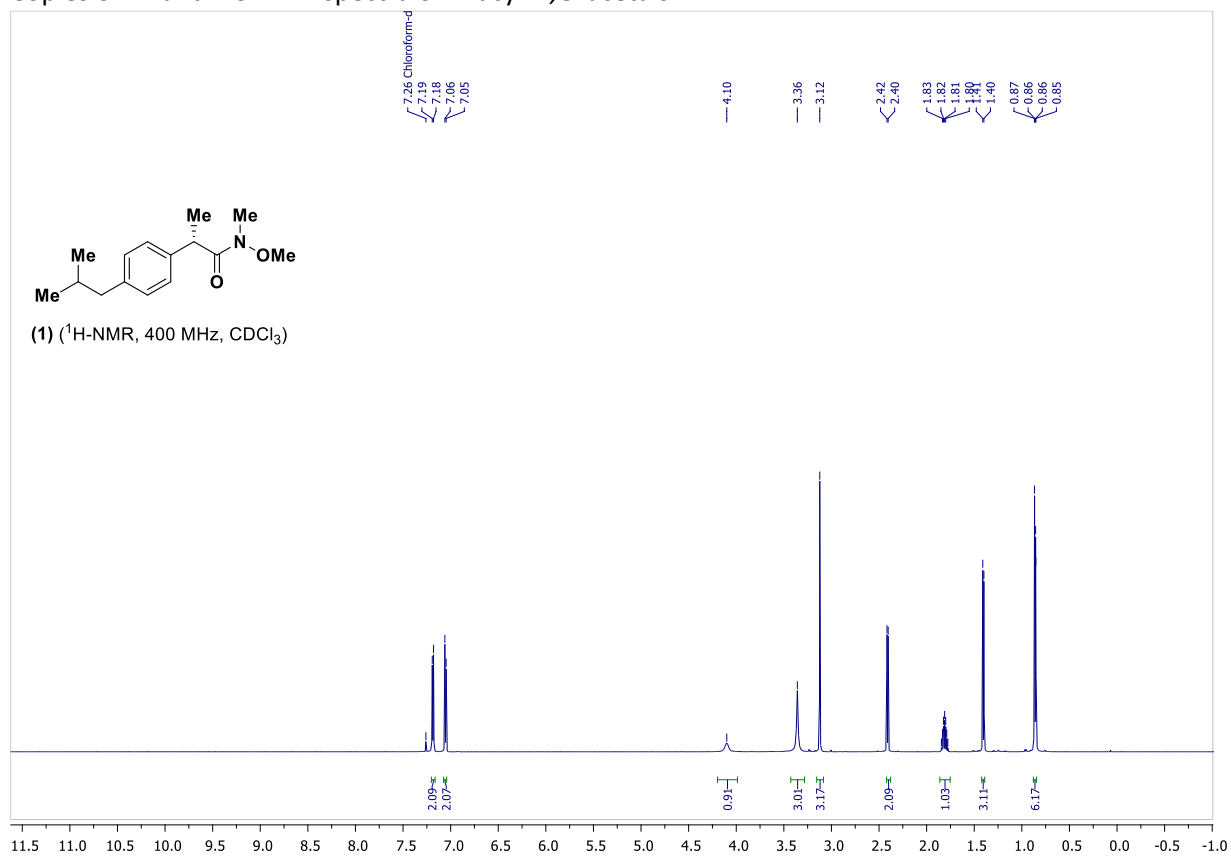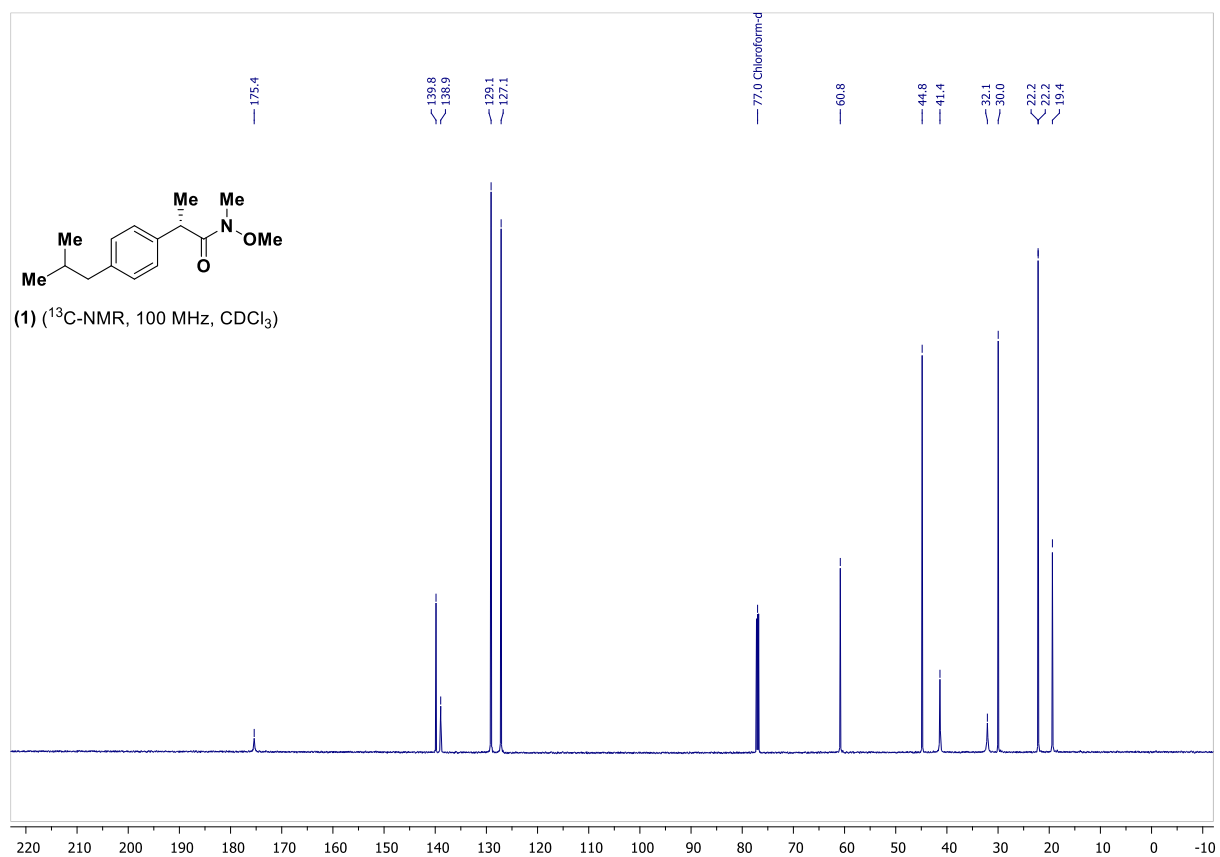

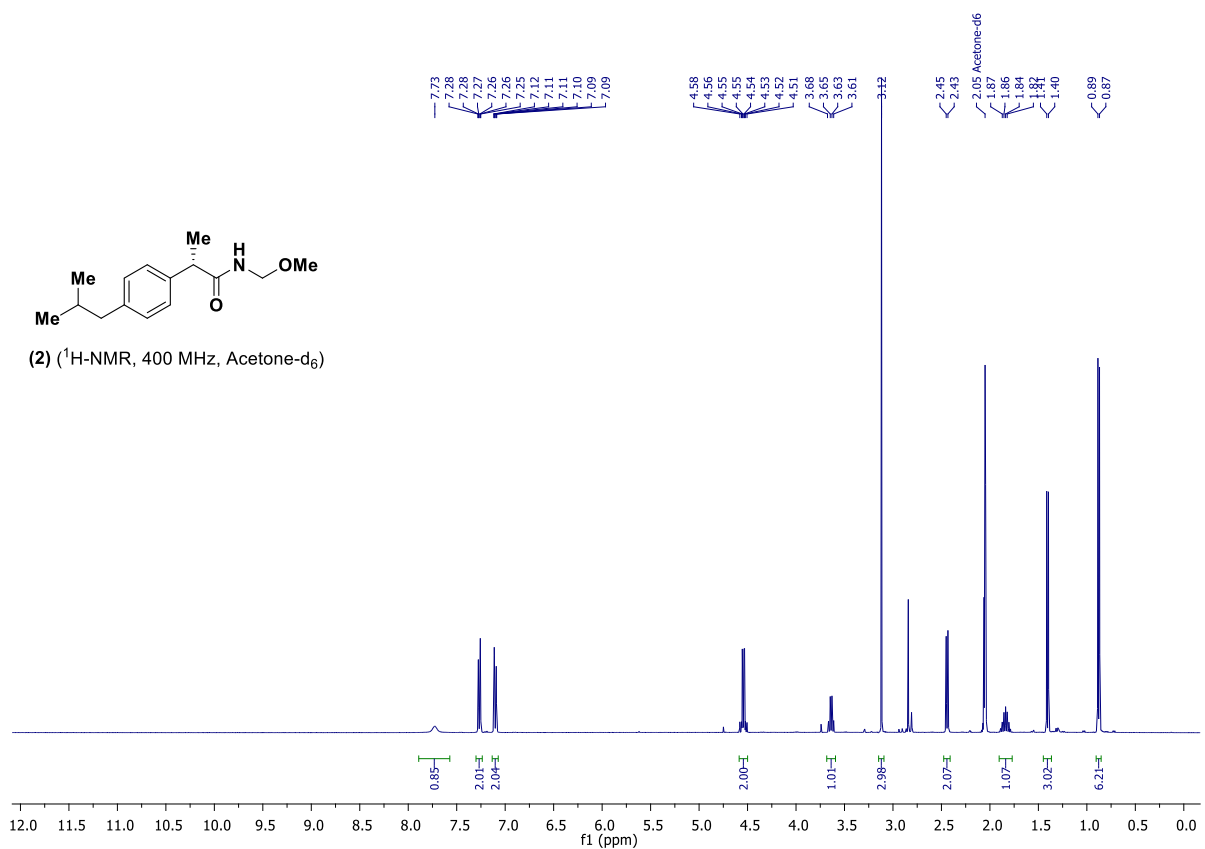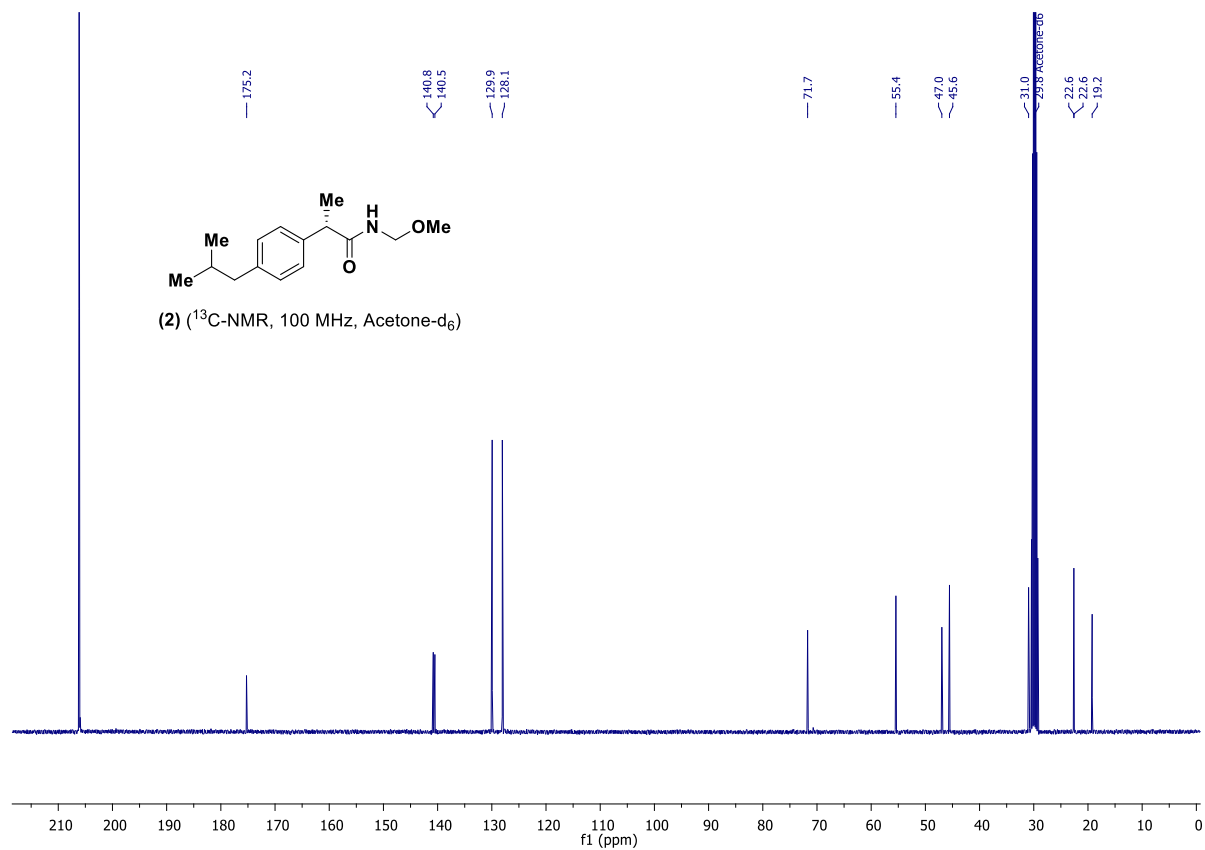

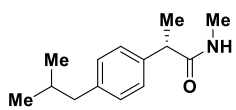

(2a) ( $^1\text{H}$ -NMR, 200 MHz,  $\text{CDCl}_3$ )

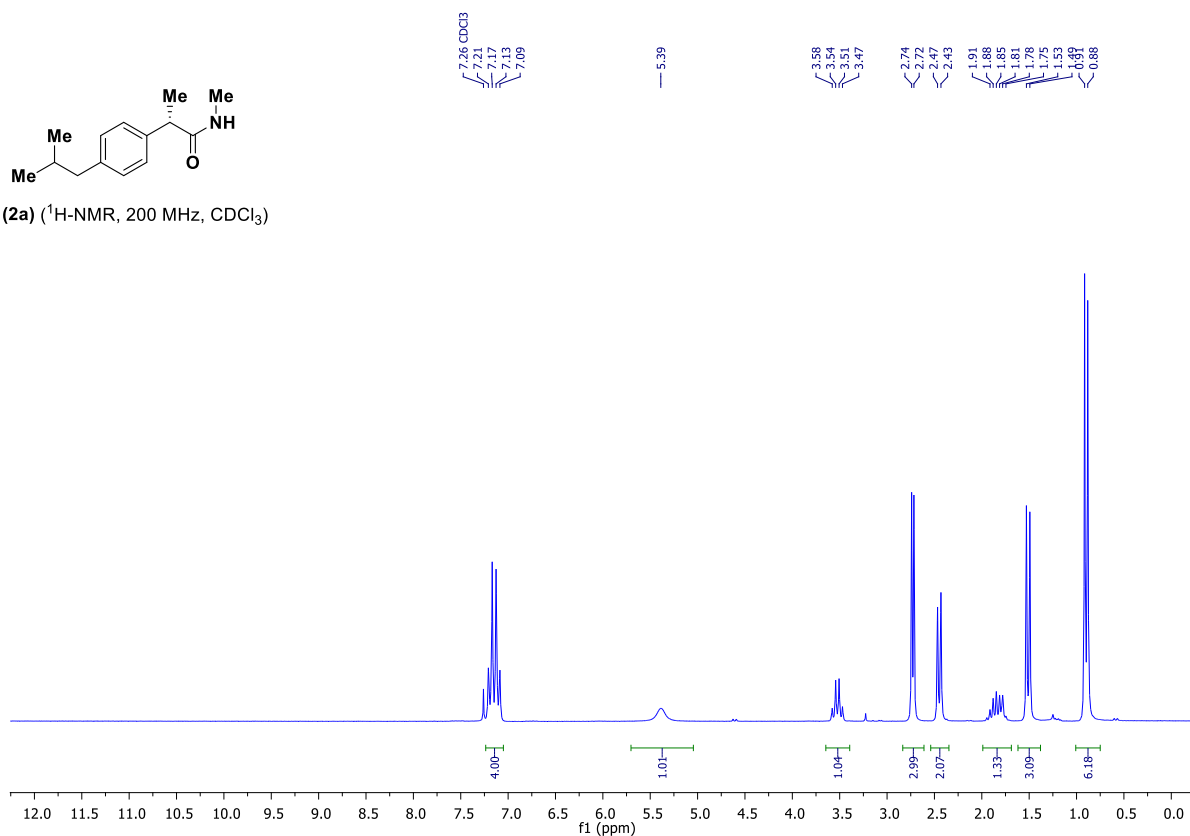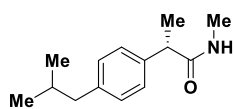

(2a) ( $^{13}\text{C}$ -NMR, 100 MHz,  $\text{CDCl}_3$ )

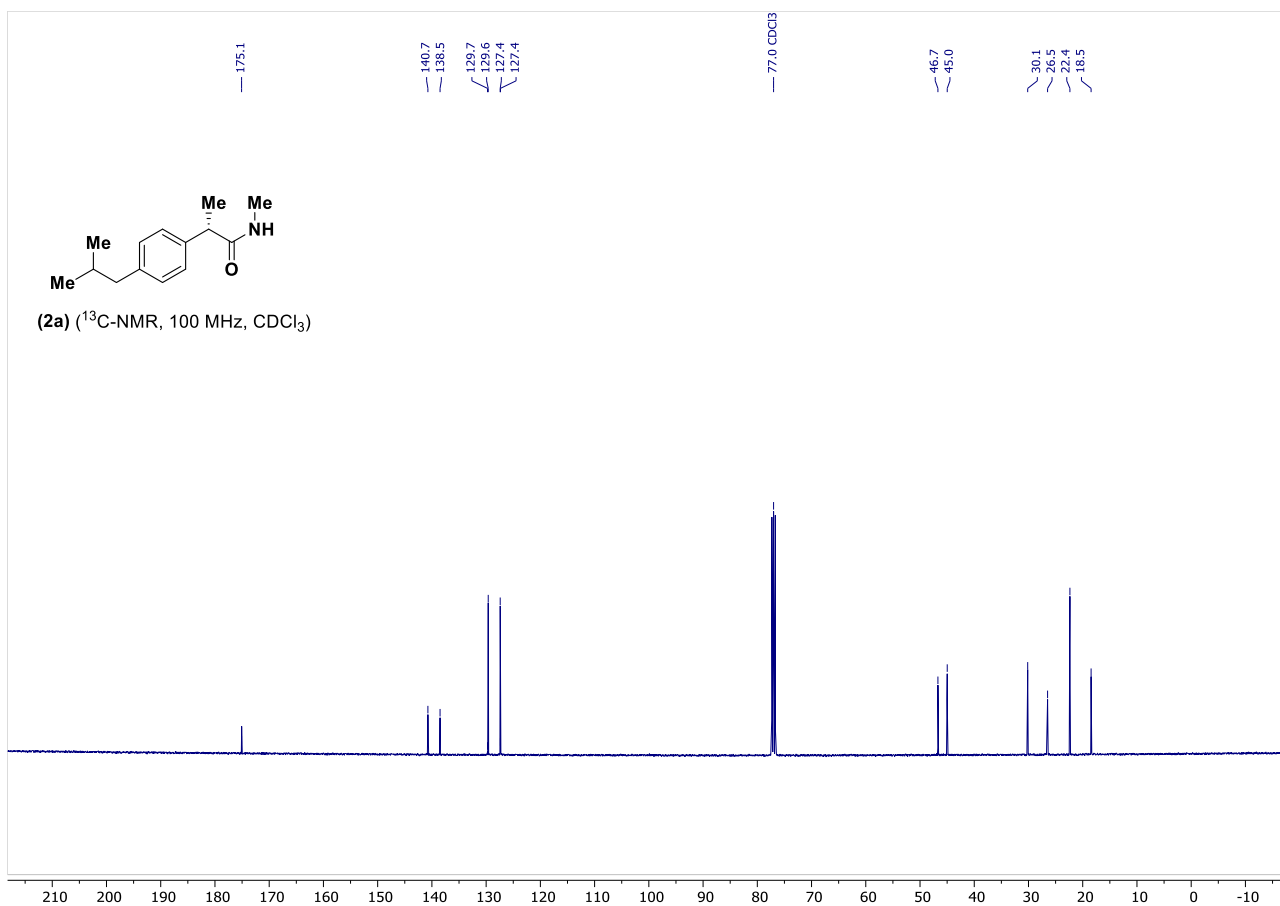

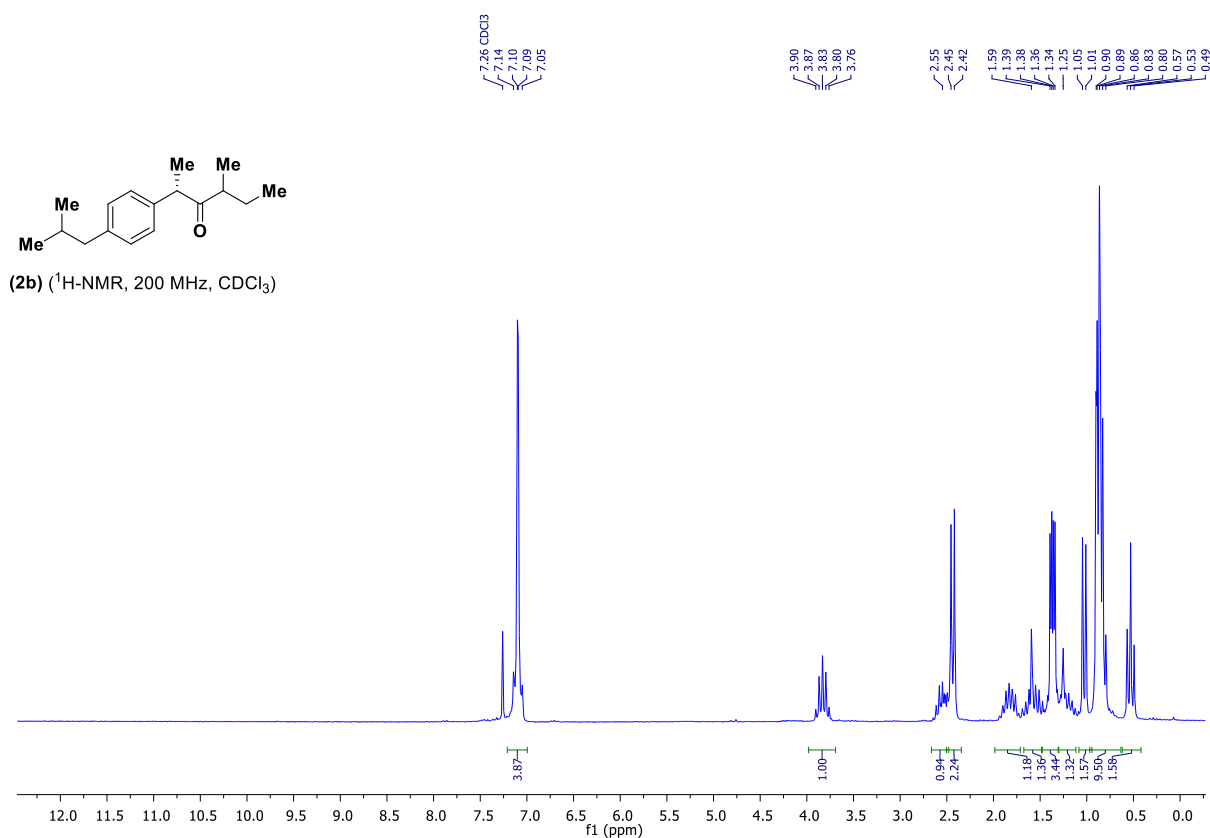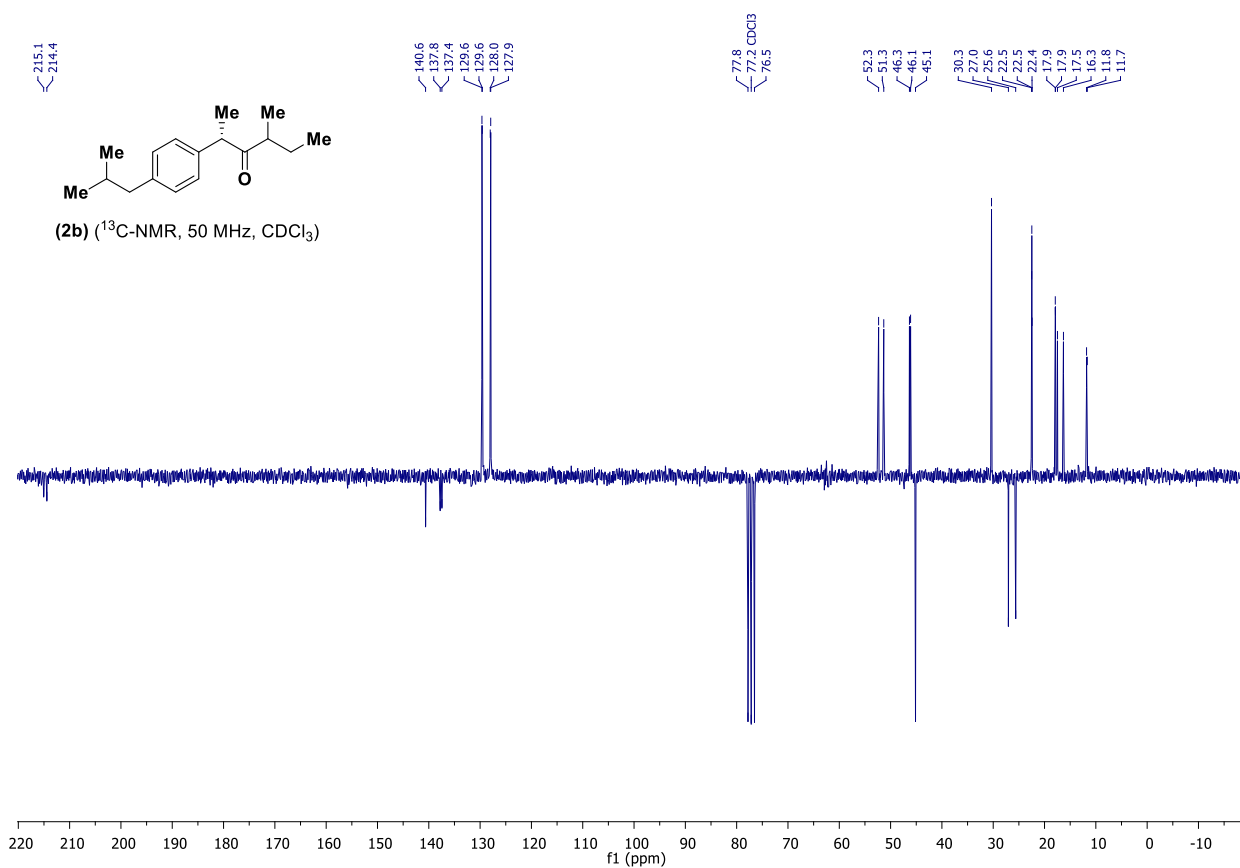

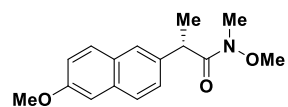

(3-sm) ( $^1\text{H}$ -NMR, 400 MHz,  $\text{CDCl}_3$ )

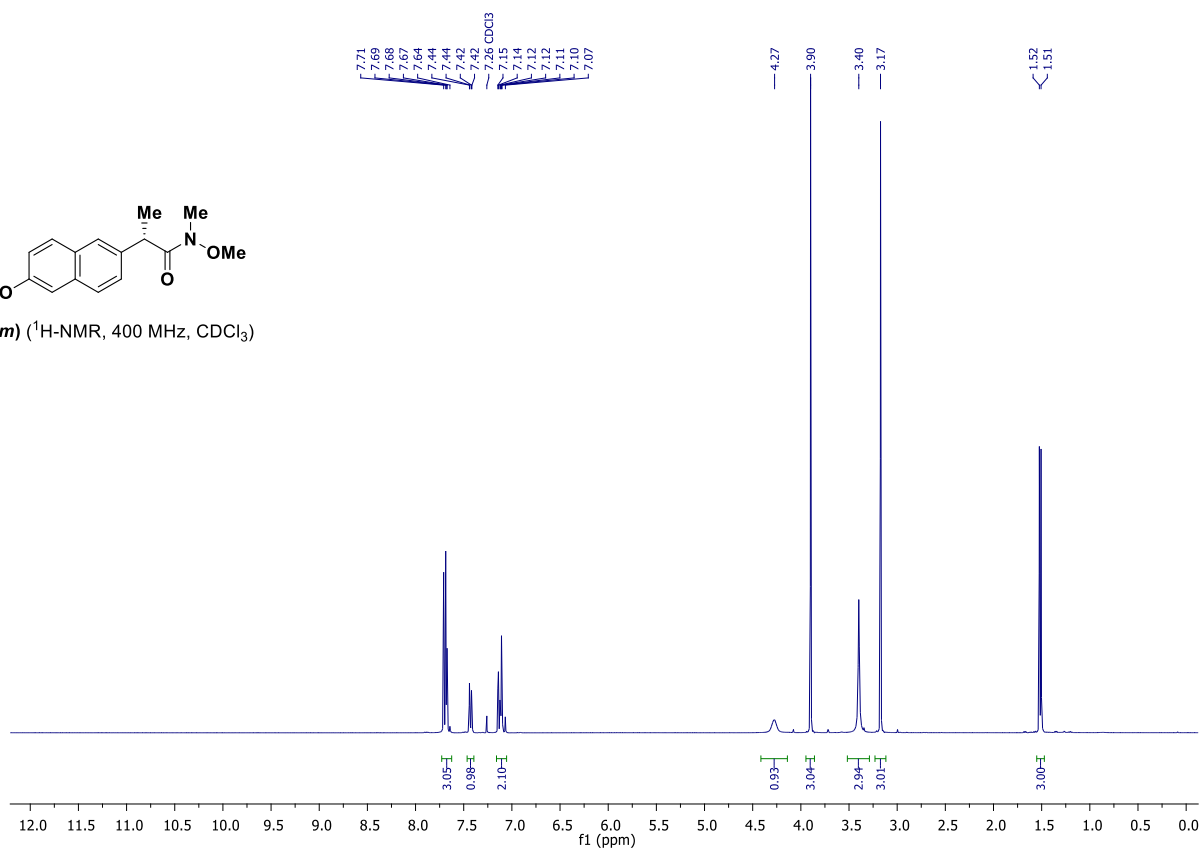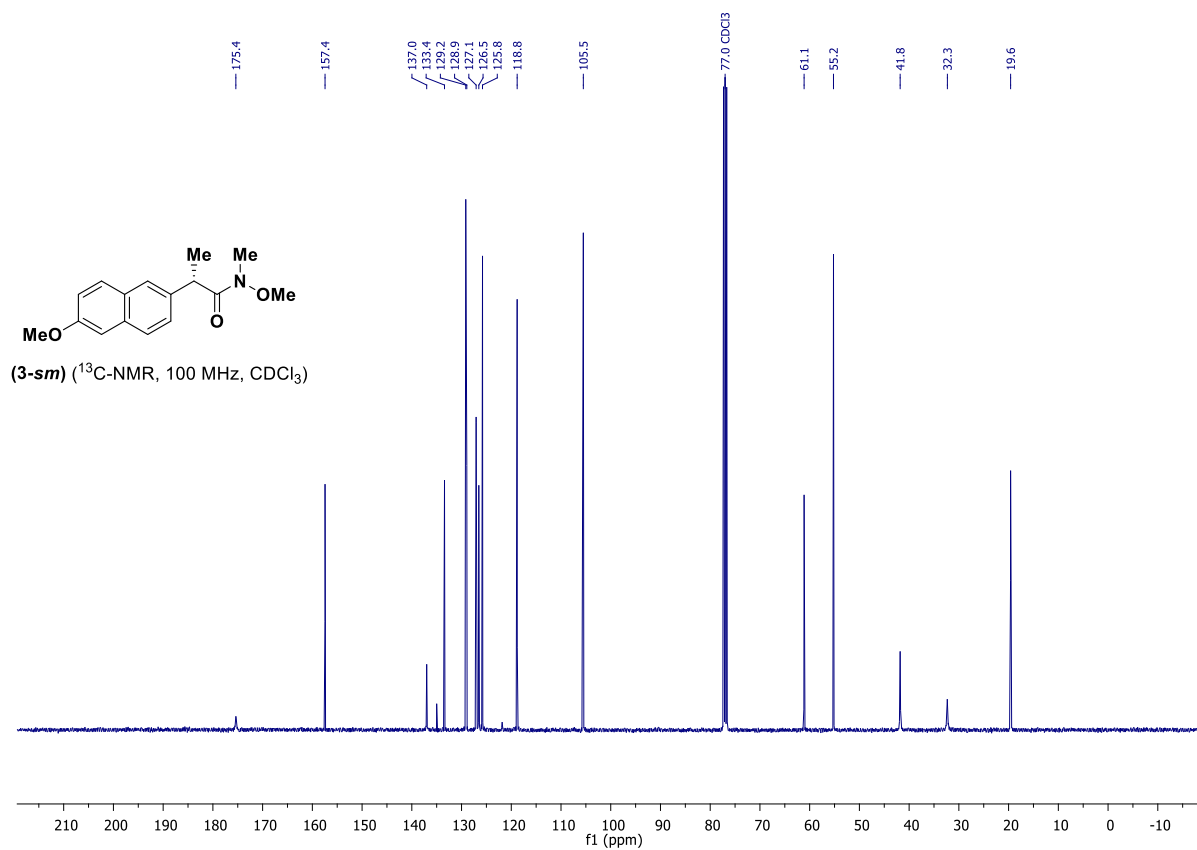

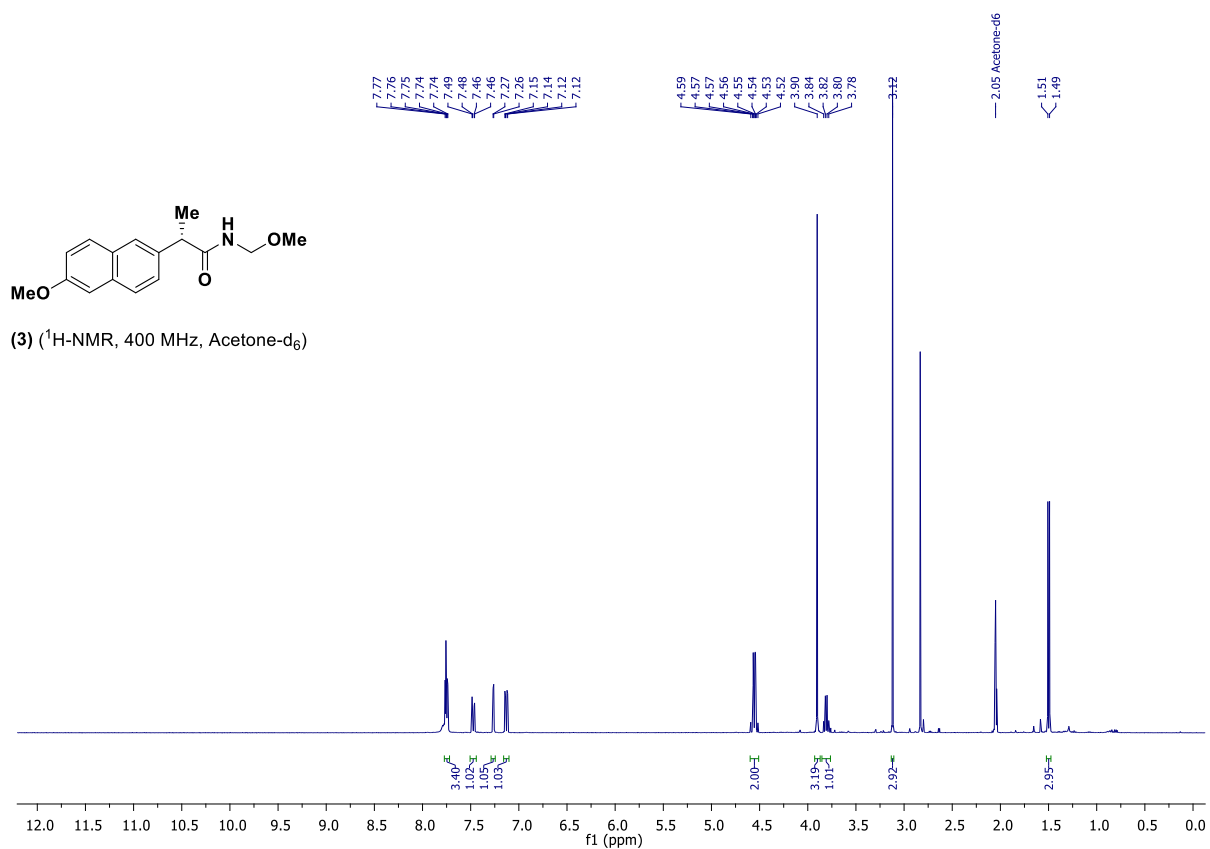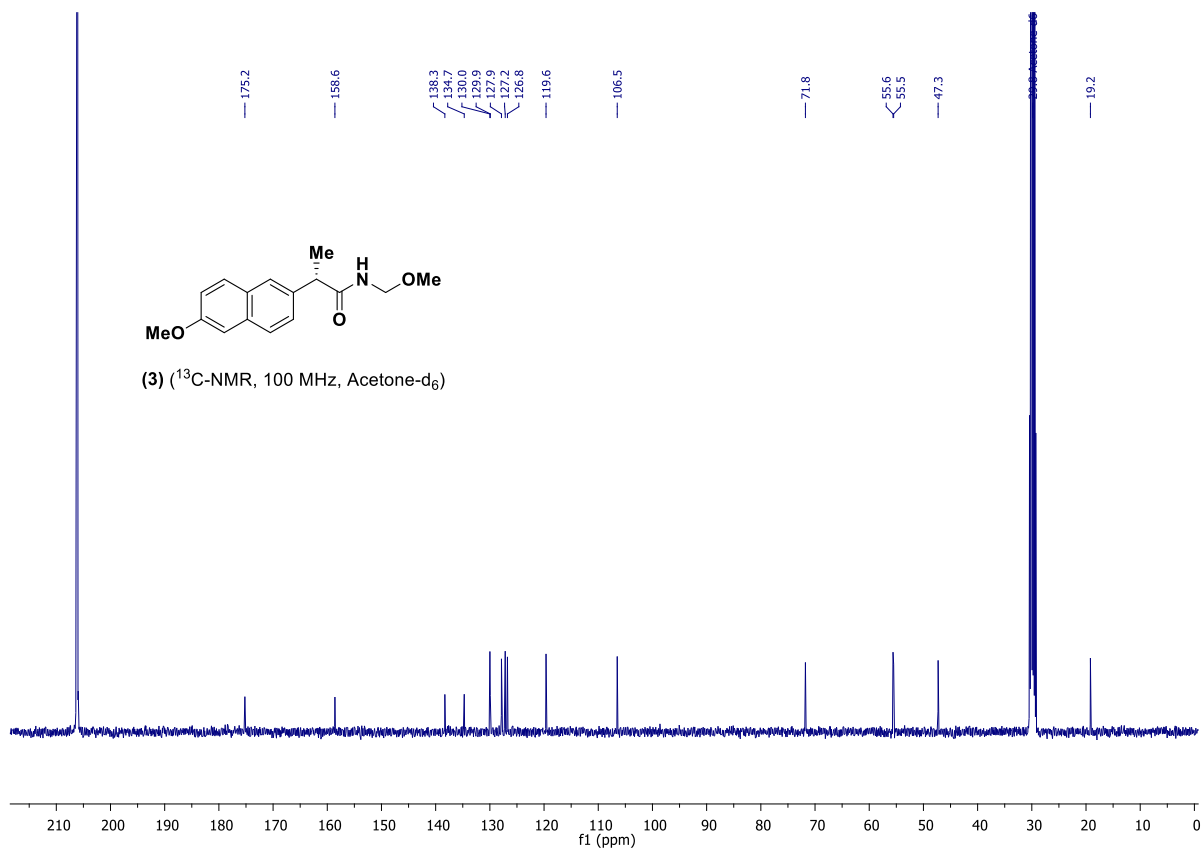

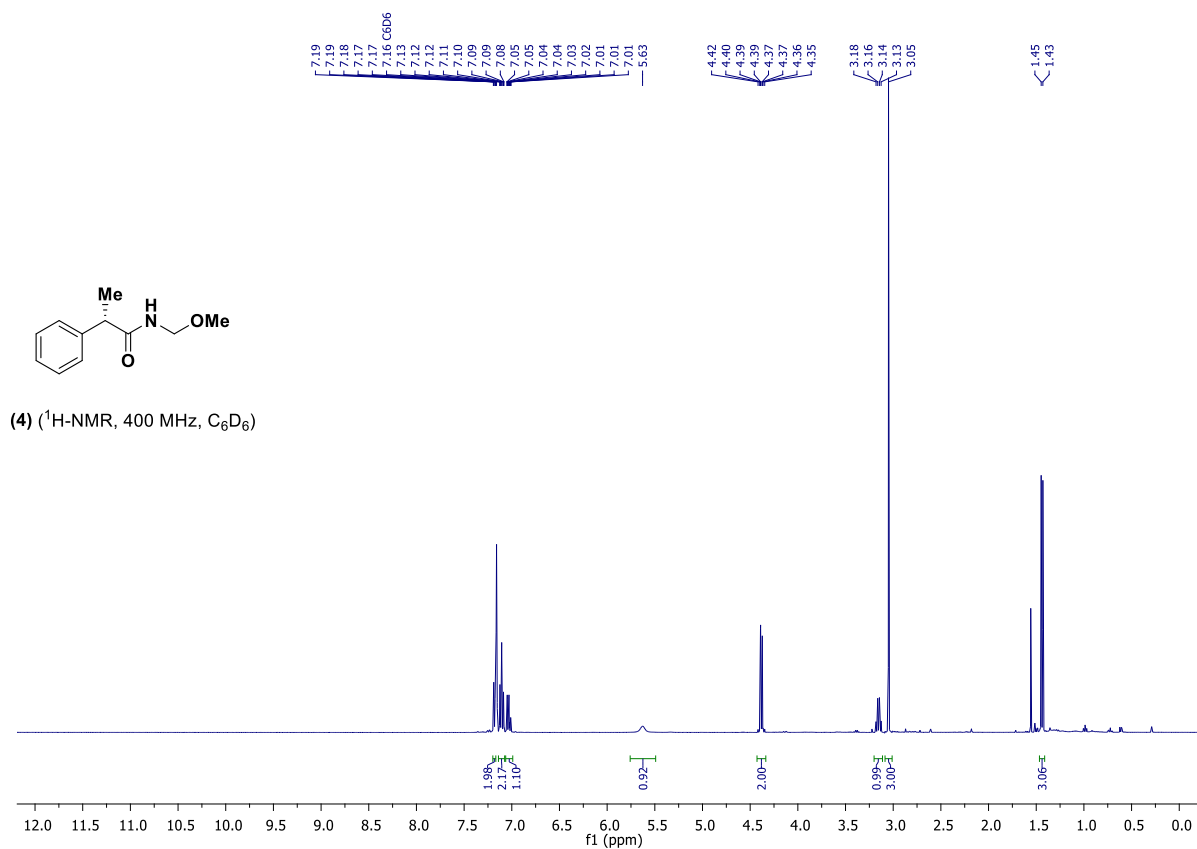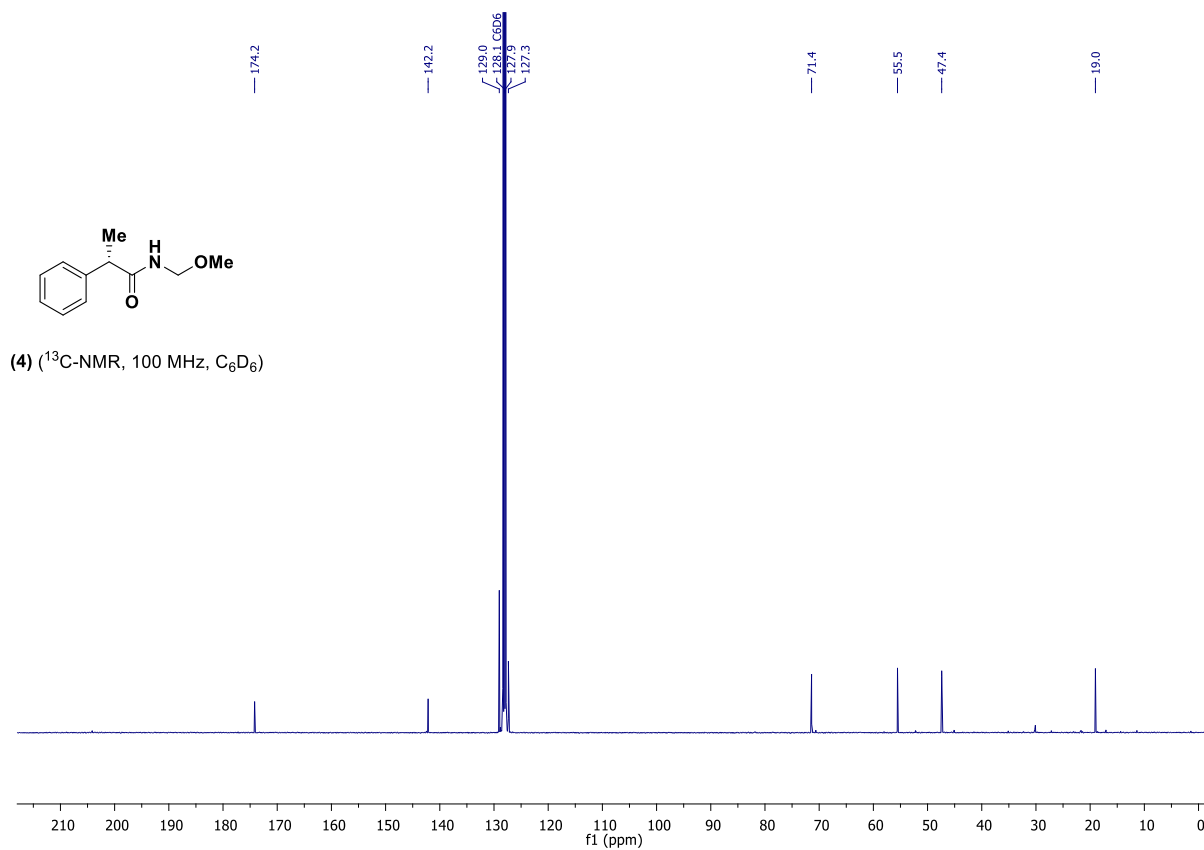

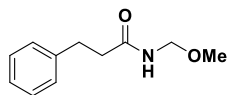

(5) ( $^1\text{H}$ -NMR, 400 MHz, Acetone- $\text{d}_6$ )

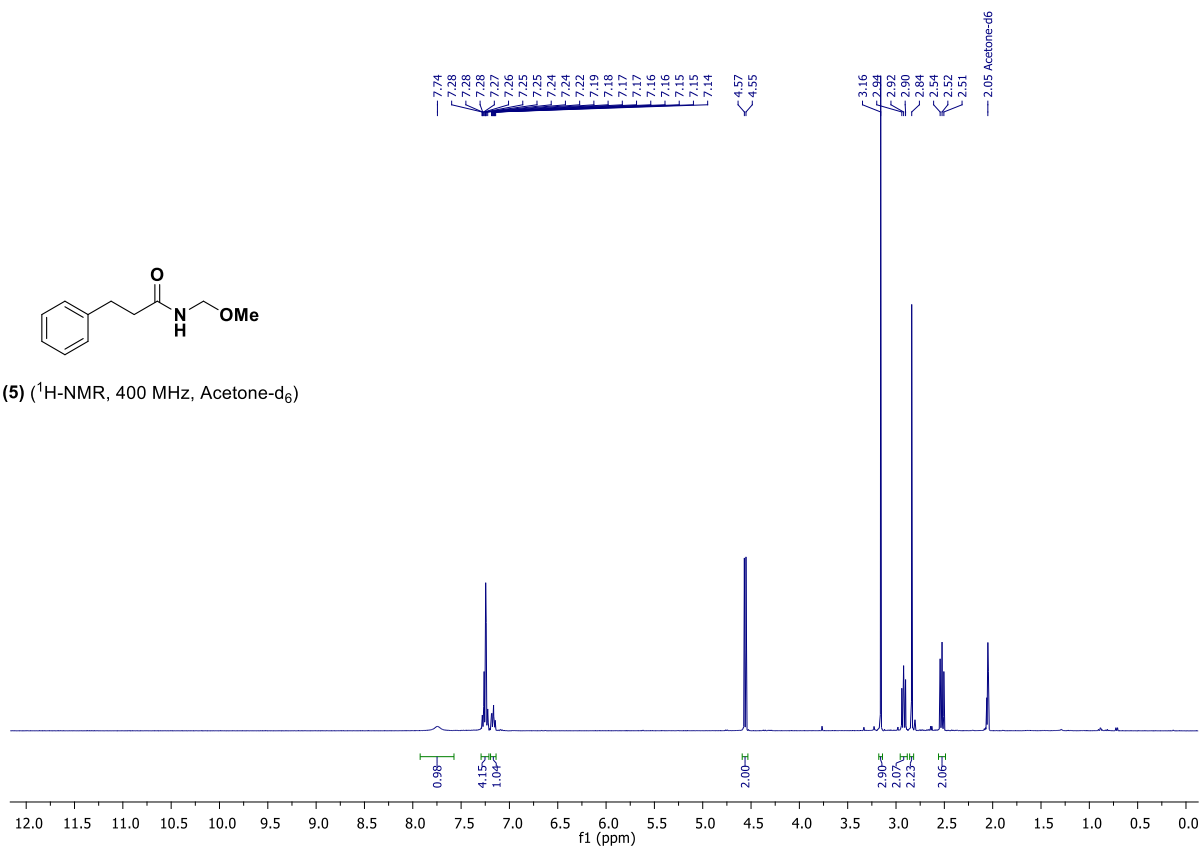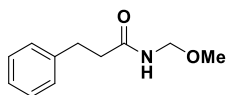

(5) ( $^{13}\text{C}$ -NMR, 100 MHz, Acetone- $\text{d}_6$ )

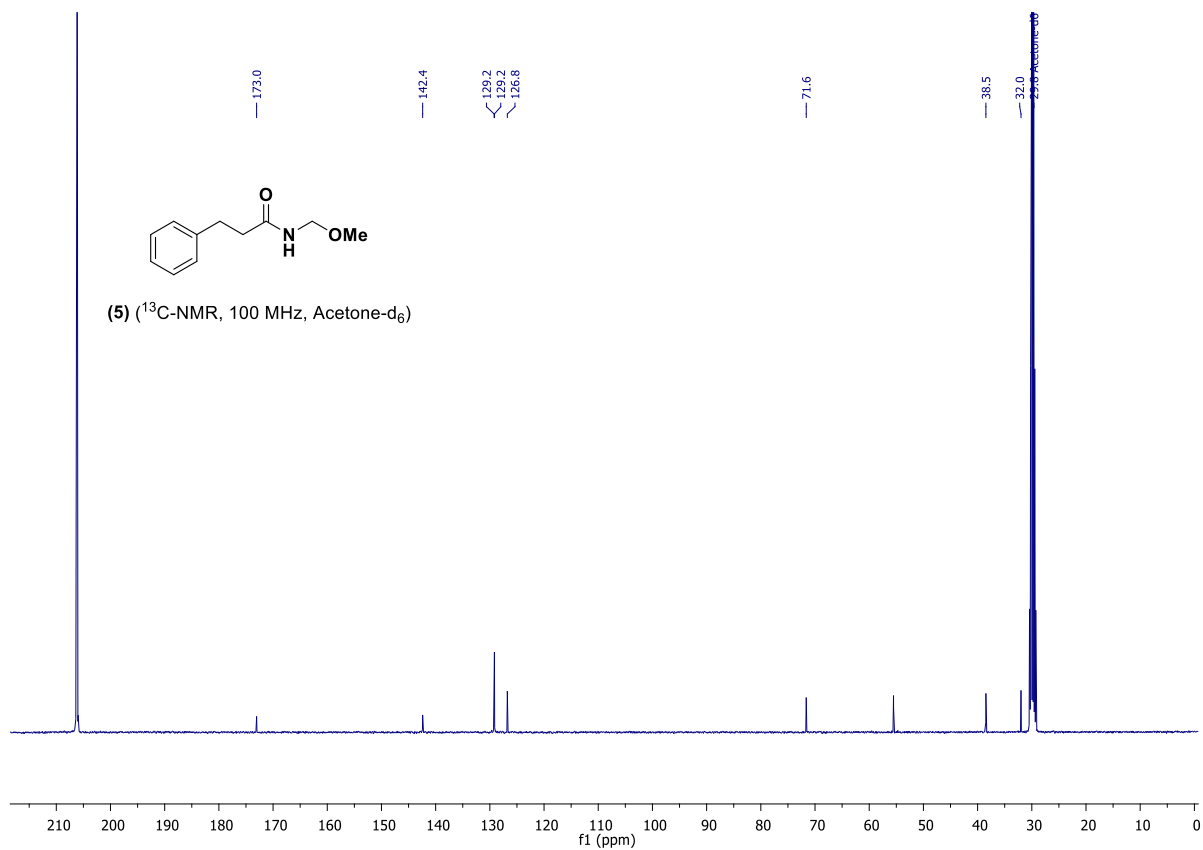

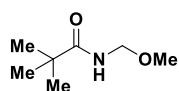

(6) ( $^1\text{H}$ -NMR, 400 MHz, Acetone- $\text{d}_6$ )

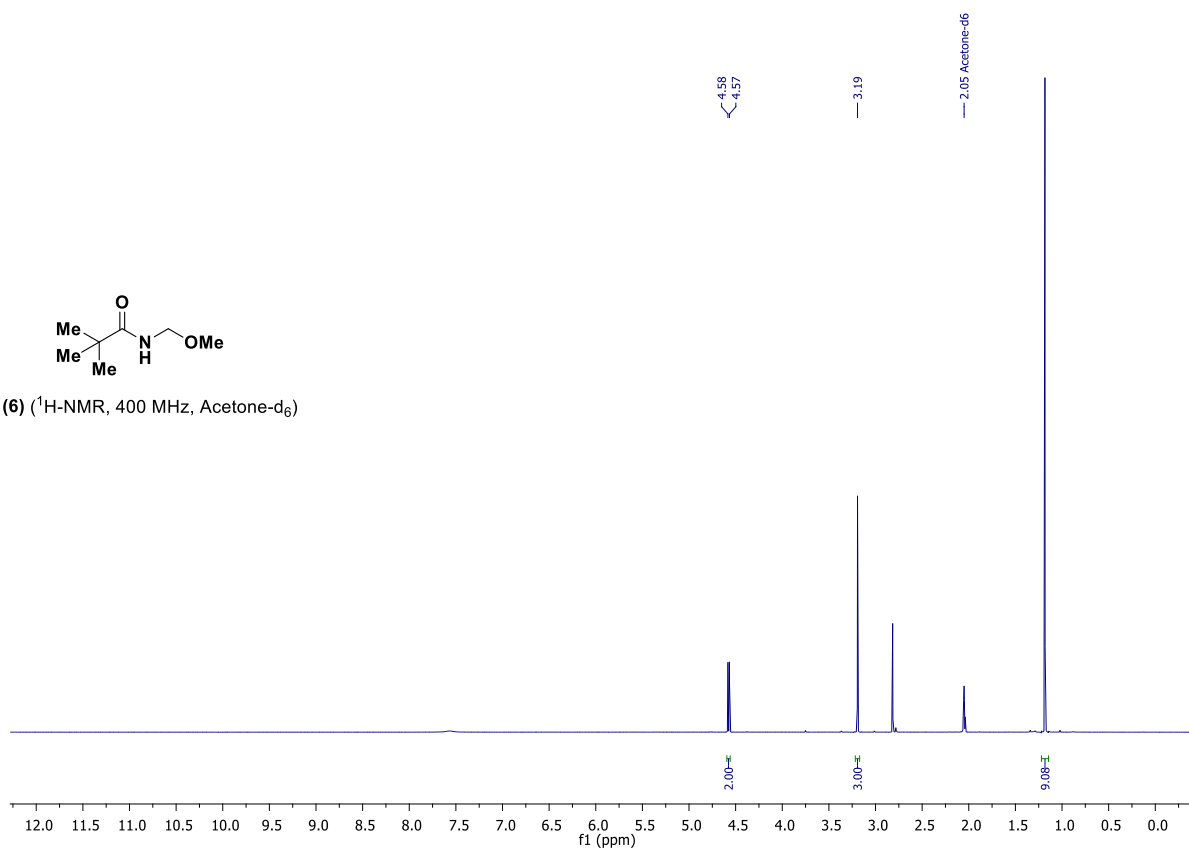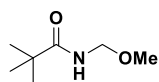

(6) ( $^{13}\text{C}$ -NMR, 100 MHz, Acetone- $\text{d}_6$ )

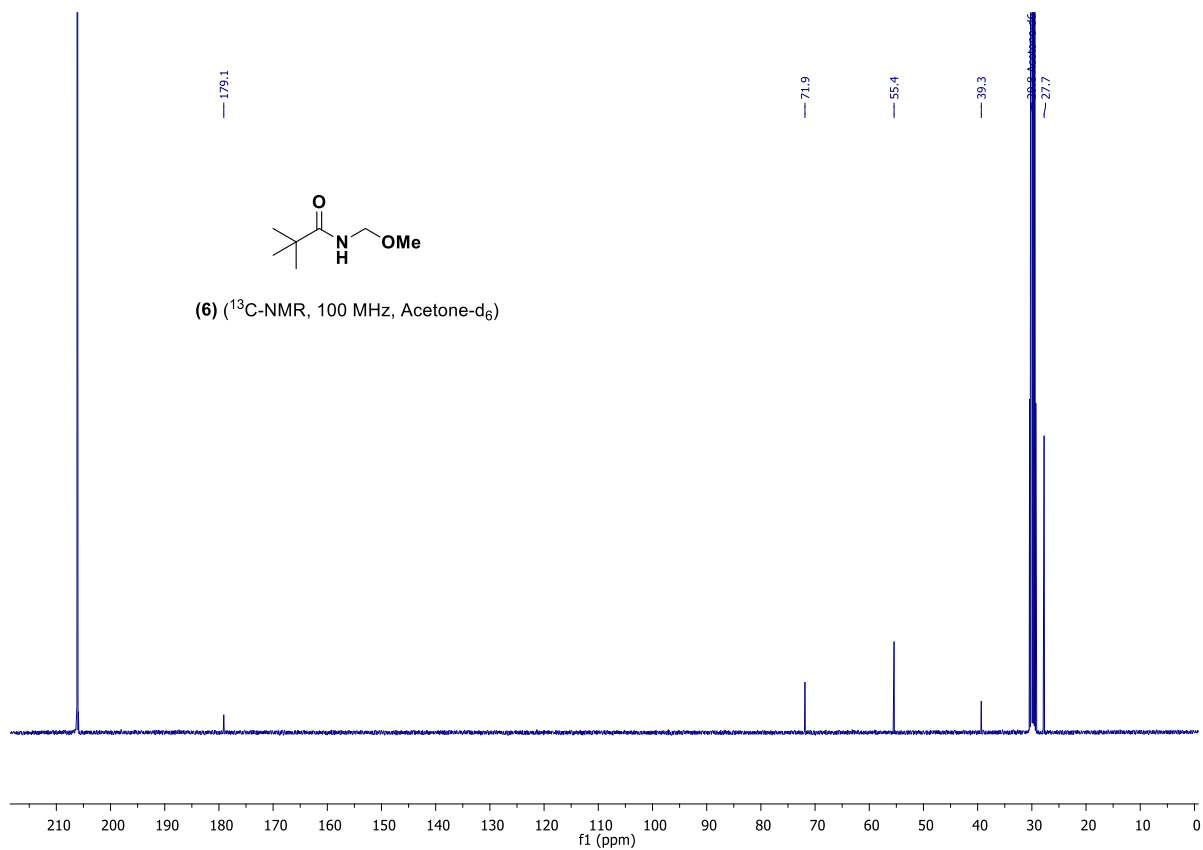

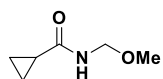

(7) ( $^1\text{H}$ -NMR, 400 MHz,  $\text{C}_6\text{D}_6$ )

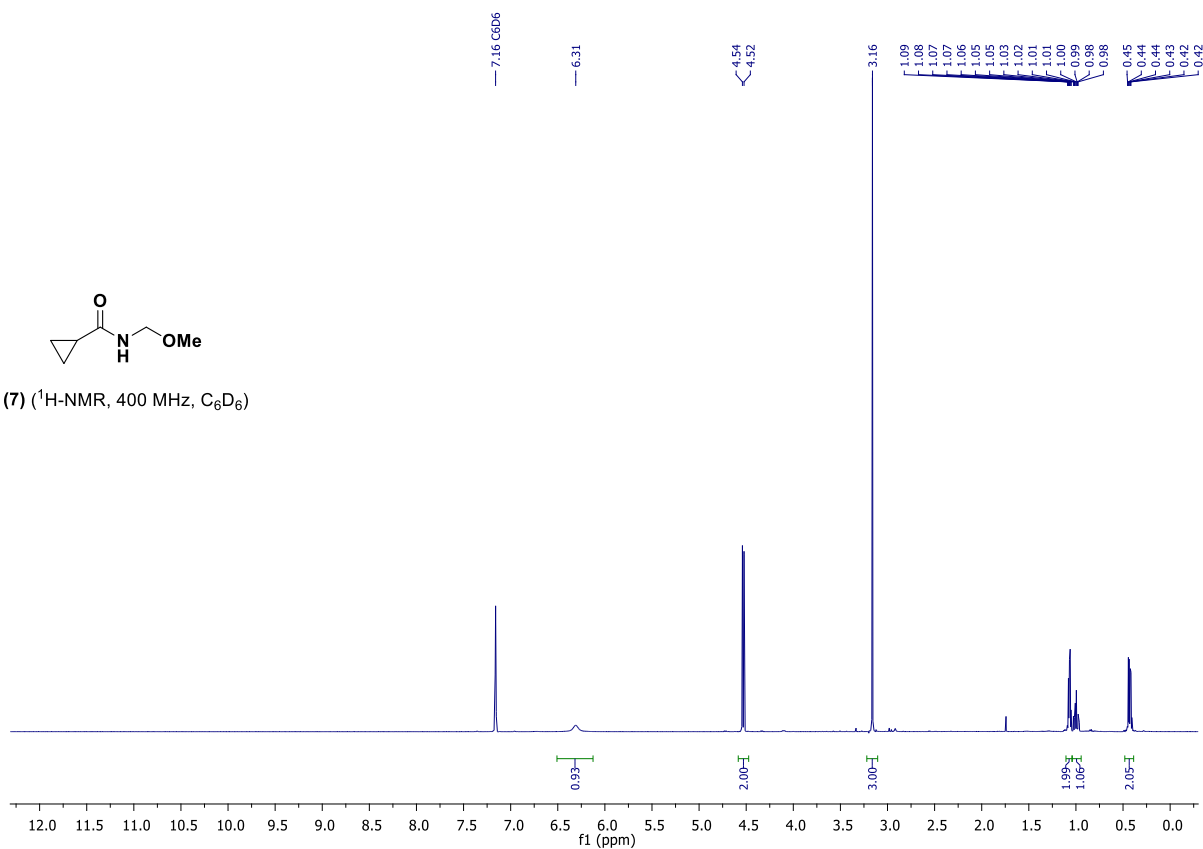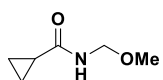

(7) ( $^{13}\text{C}$ -NMR, 100 MHz,  $\text{C}_6\text{D}_6$ )

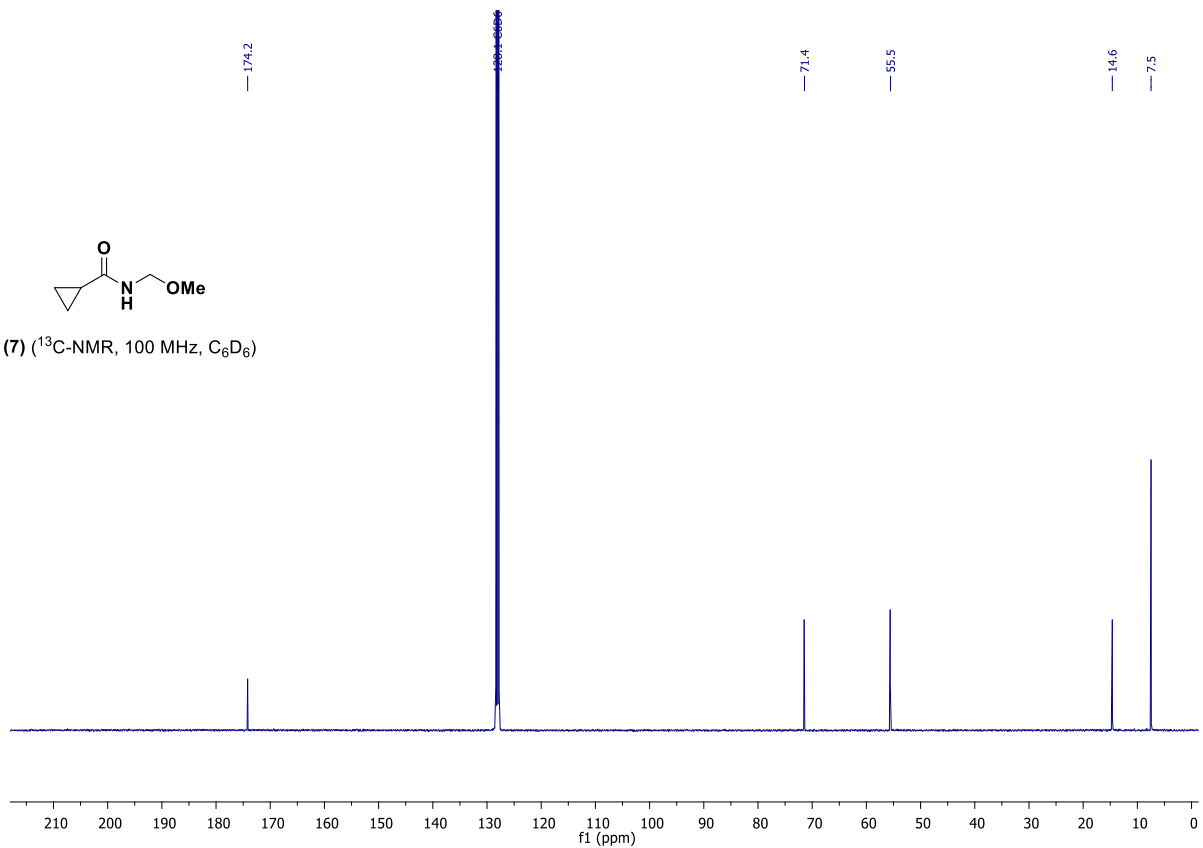

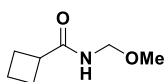

(8) ( $^1\text{H}$ -NMR, 400 MHz,  $\text{C}_6\text{D}_6$ )

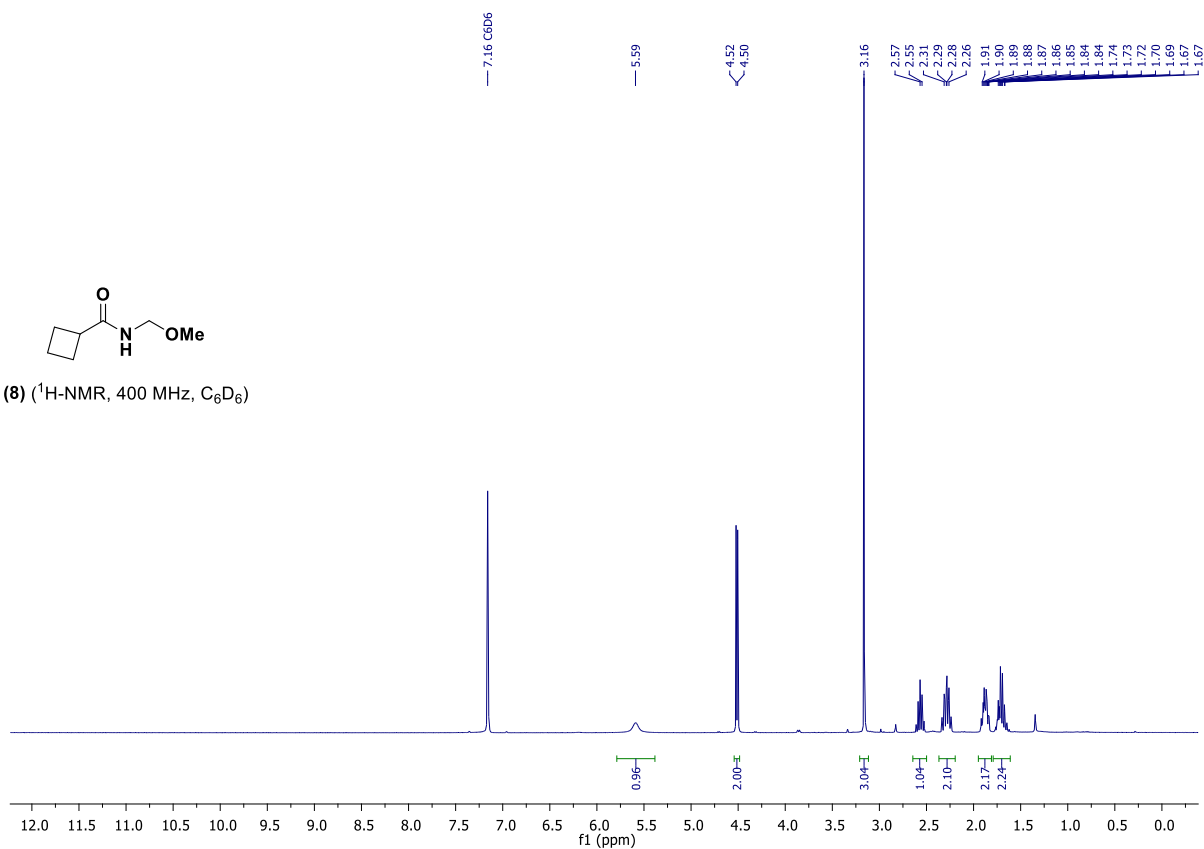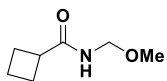

(8) ( $^{13}\text{C}$ -NMR, 100 MHz,  $\text{C}_6\text{D}_6$ )

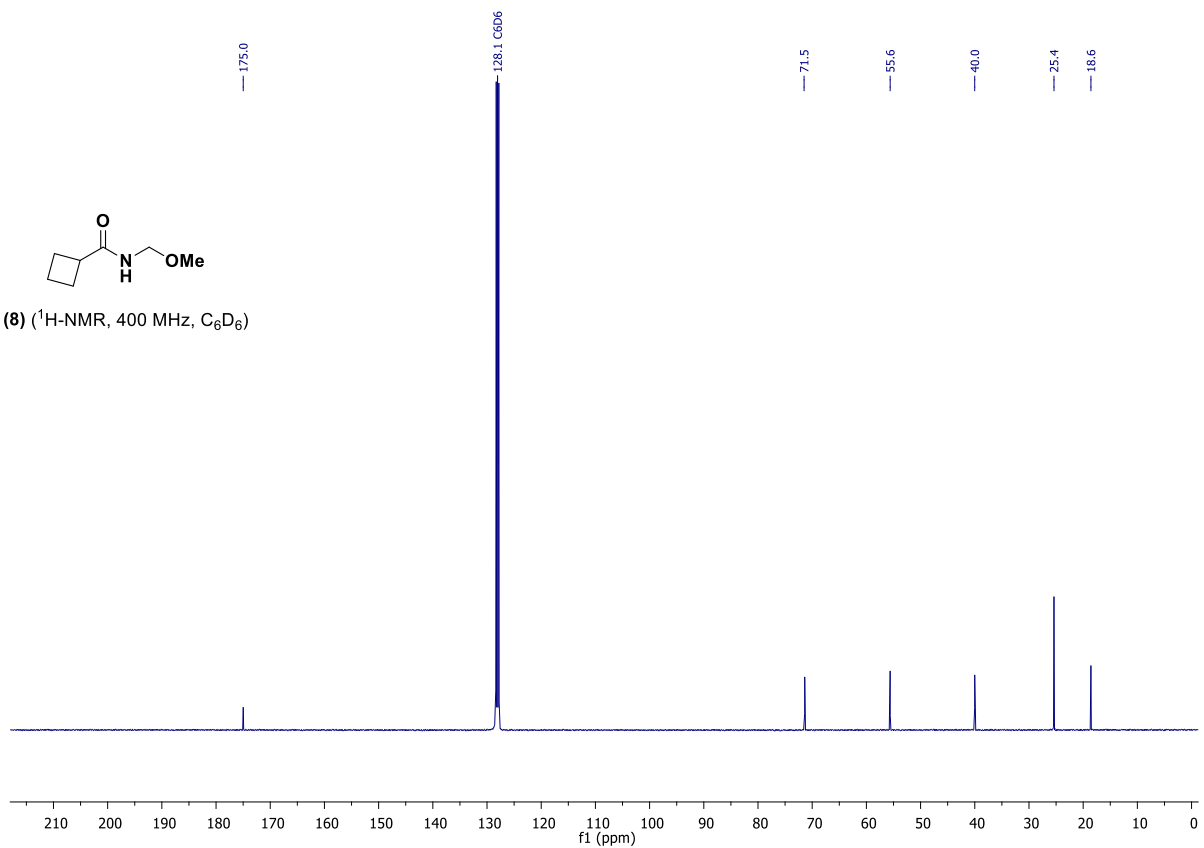

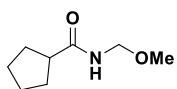

(9) ( $^1\text{H}$ -NMR, 400 MHz,  $\text{C}_6\text{D}_6$ )

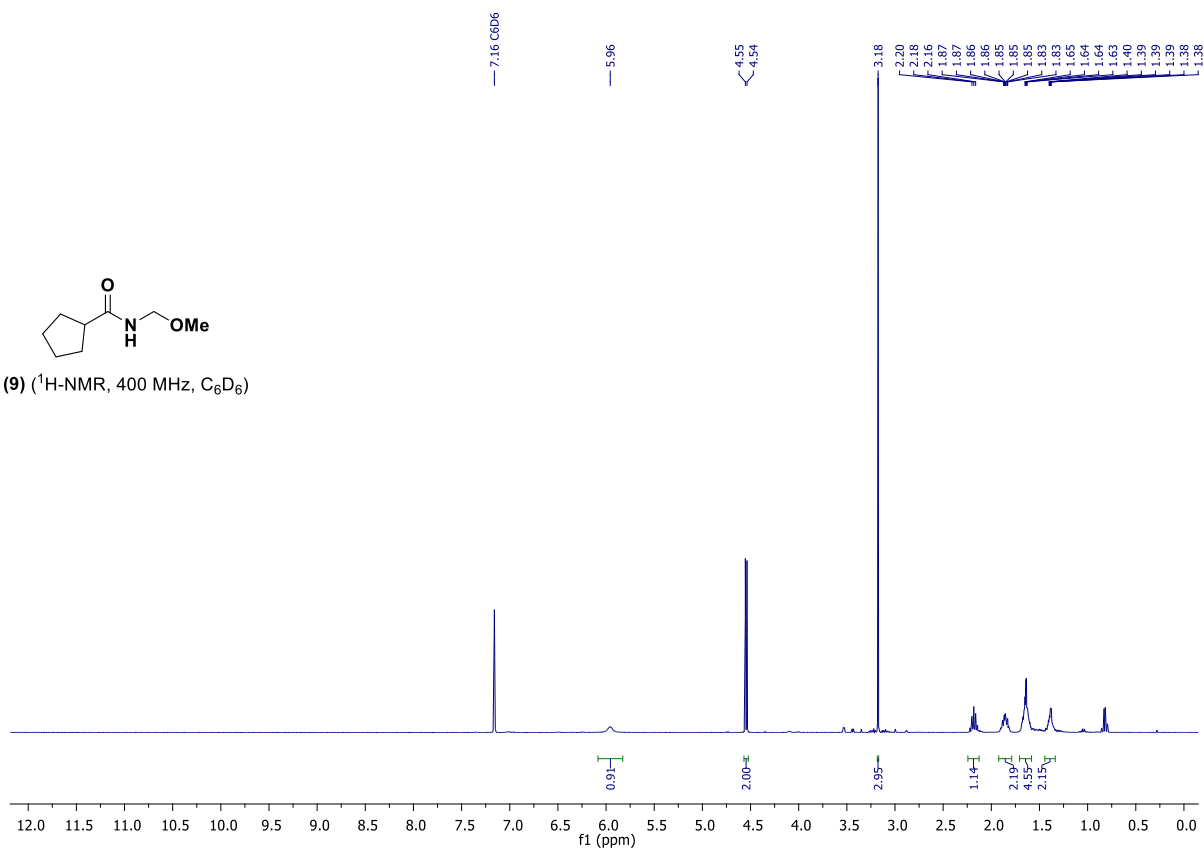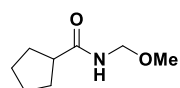

(9) ( $^{13}\text{C}$ -NMR, 100 MHz,  $\text{C}_6\text{D}_6$ )

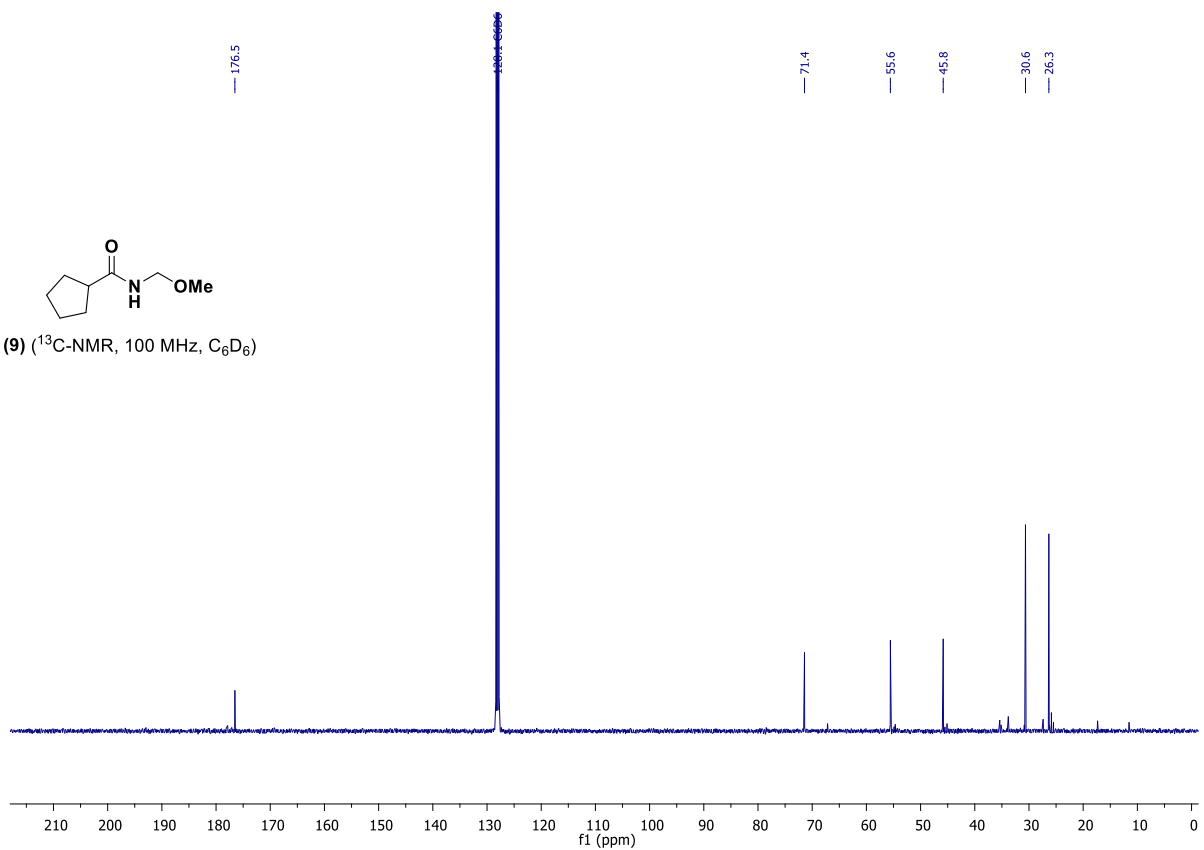

CN(C(=O)C1CCCCC1)OC  
**(10)** ( $^1\text{H}$ -NMR, 400 MHz,  $\text{C}_6\text{D}_6$ )

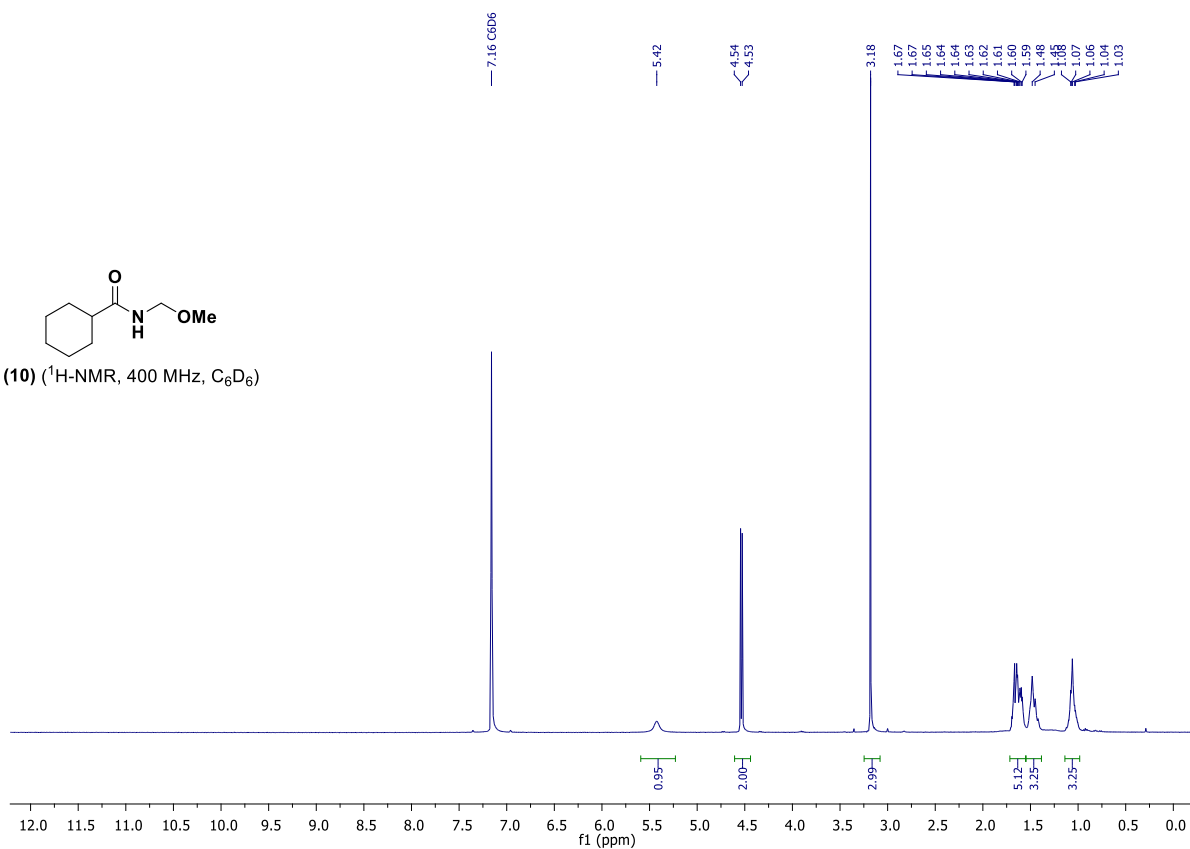

CN(C(=O)C1CCCCC1)OC  
**(10)** ( $^{13}\text{C}$ -NMR, 100 MHz,  $\text{C}_6\text{D}_6$ )

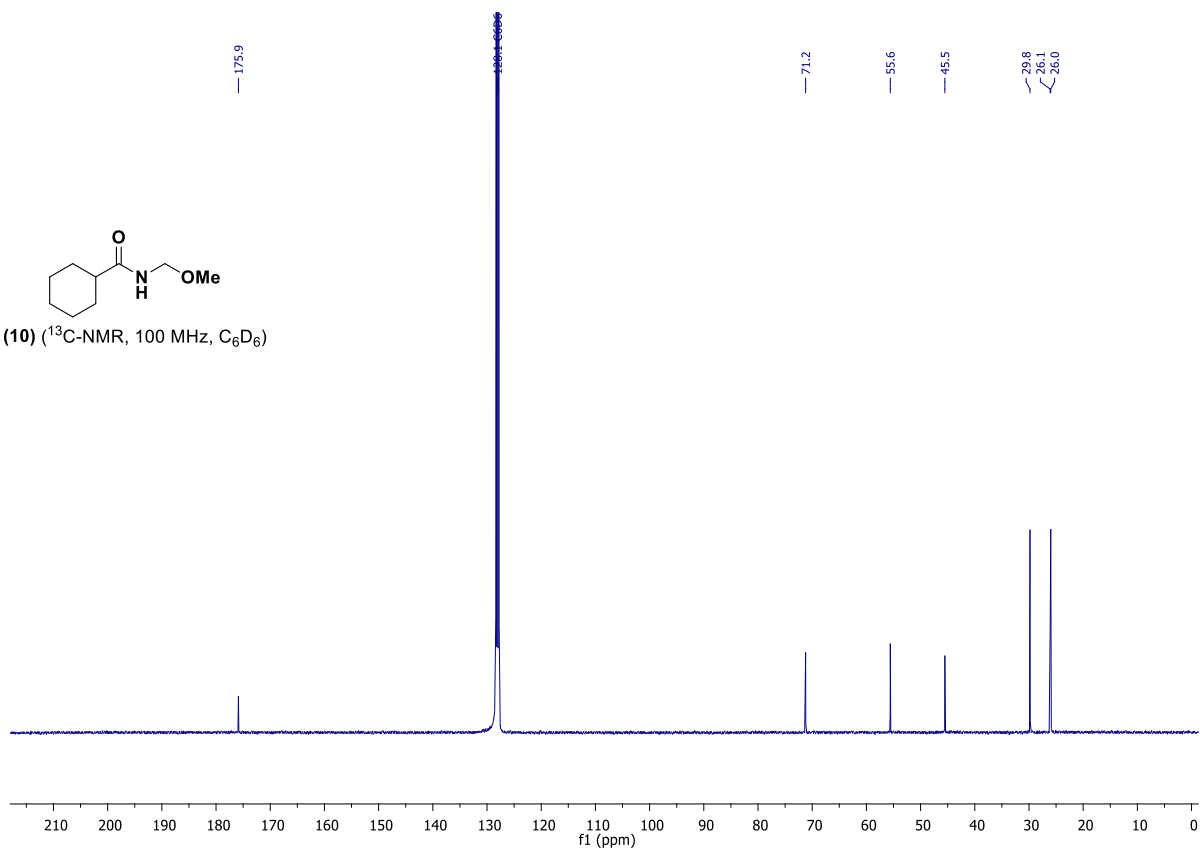

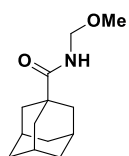

(11) ( $^1\text{H}$ -NMR, 400 MHz,  $\text{C}_6\text{D}_6$ )

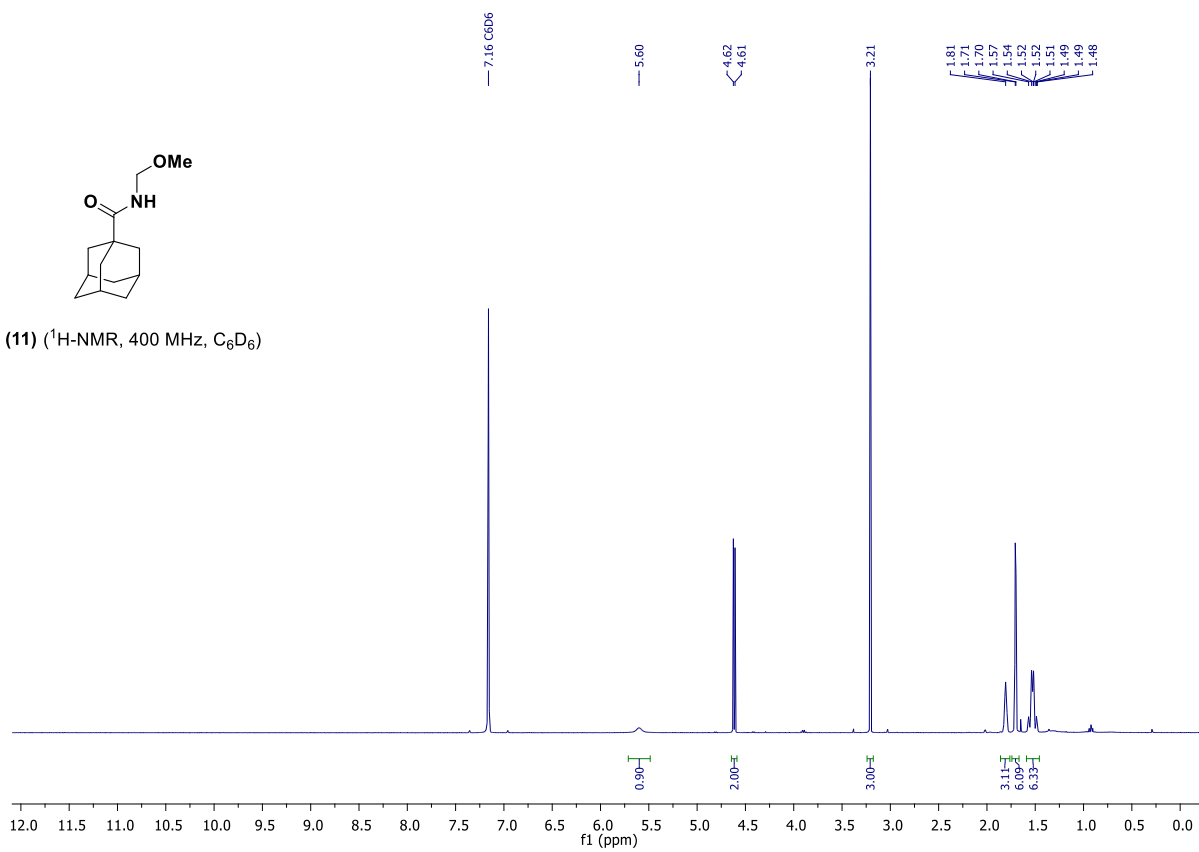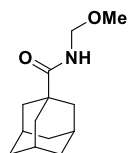

(11) ( $^{13}\text{C}$ -NMR, 100 MHz,  $\text{C}_6\text{D}_6$ )

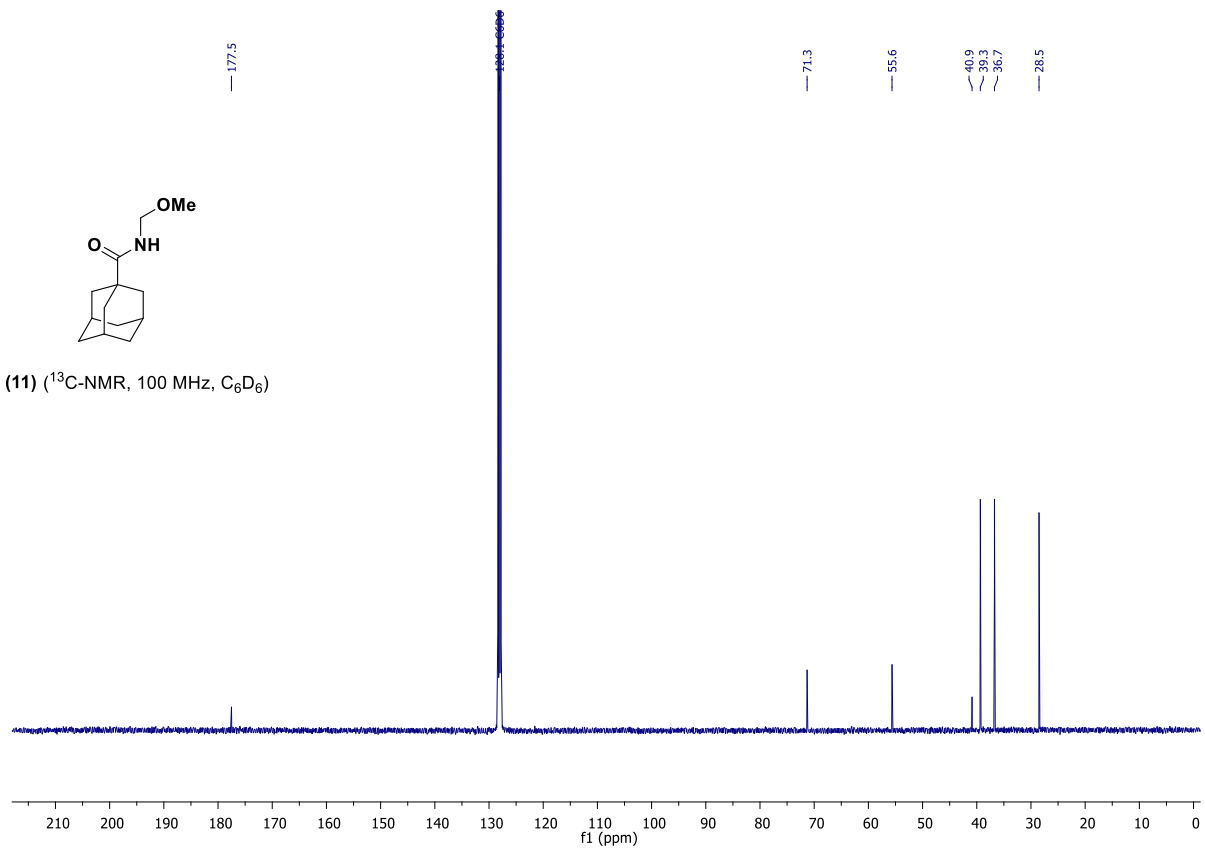

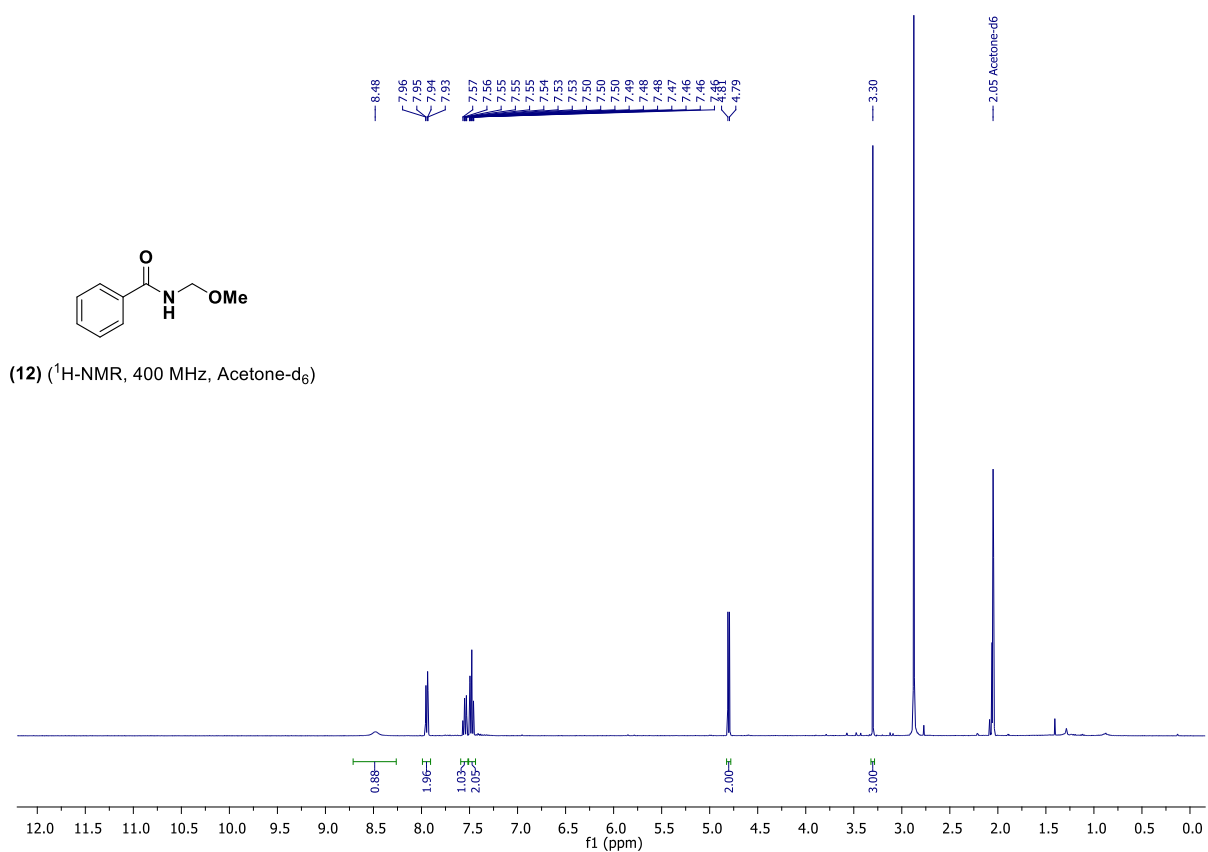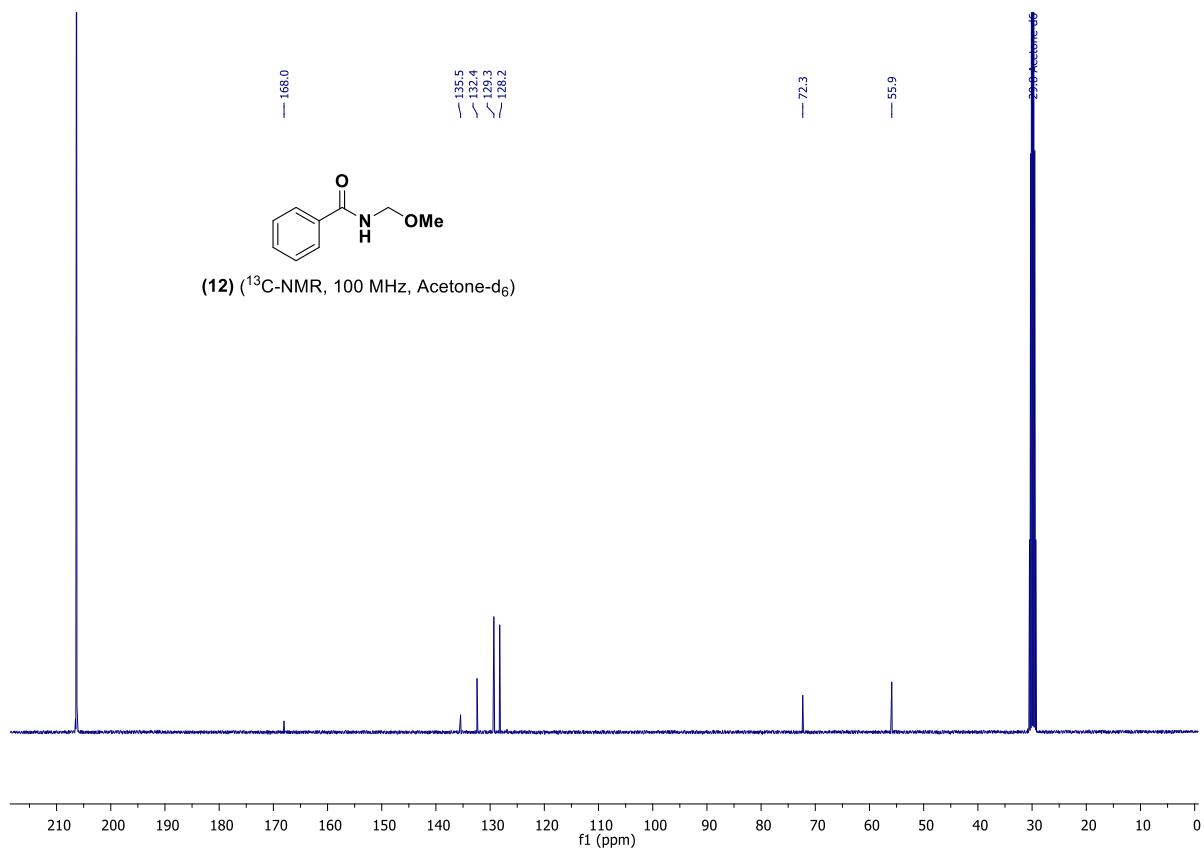

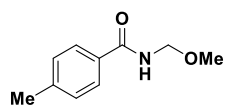

(13) ( $^1\text{H}$ -NMR, 400 MHz,  $\text{C}_6\text{D}_6$ )

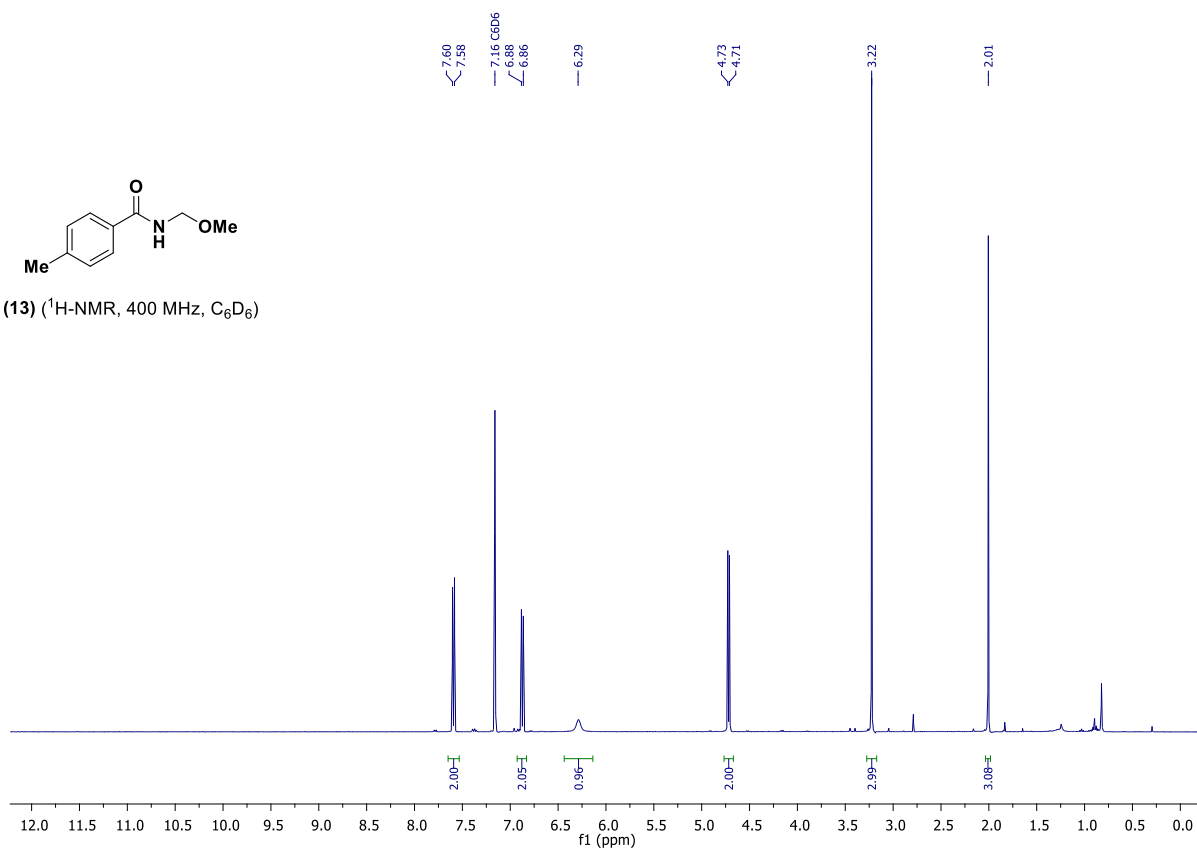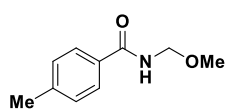

(13) ( $^{13}\text{C}$ -NMR, 100 MHz,  $\text{C}_6\text{D}_6$ )

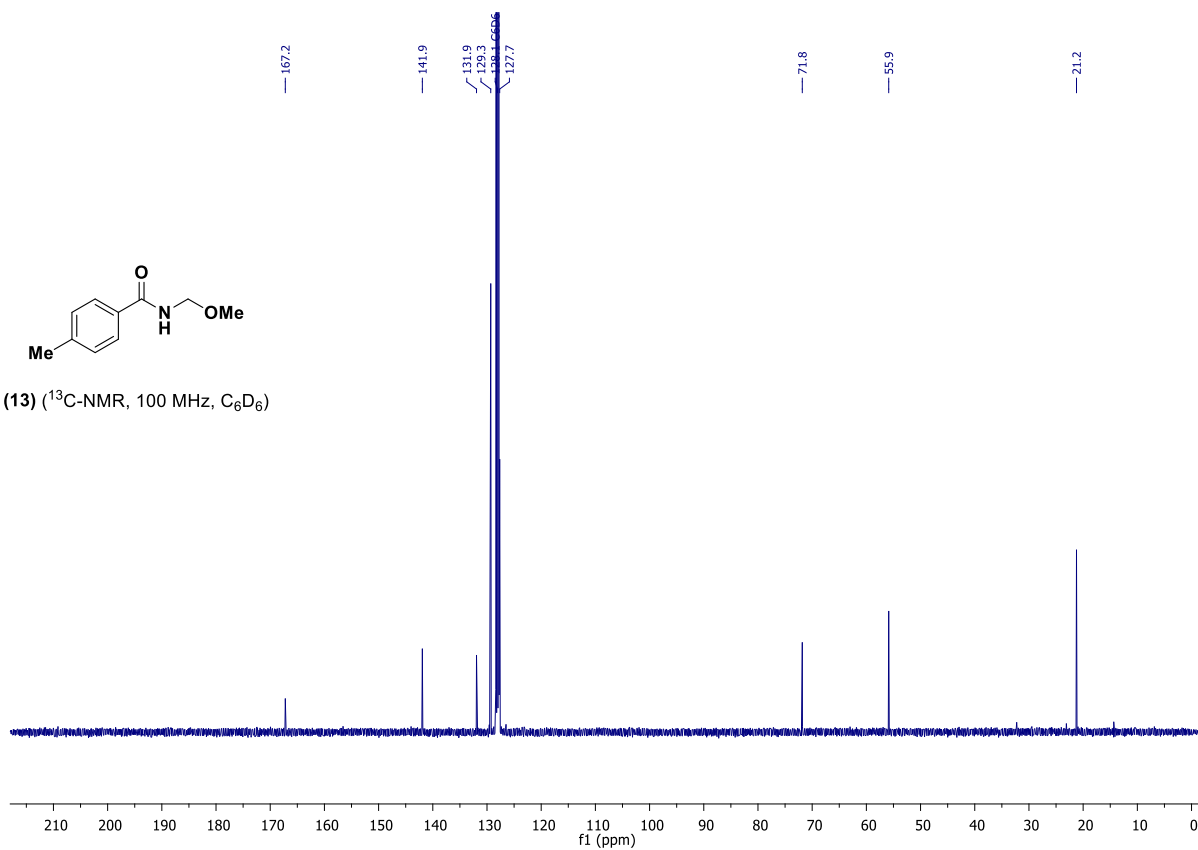

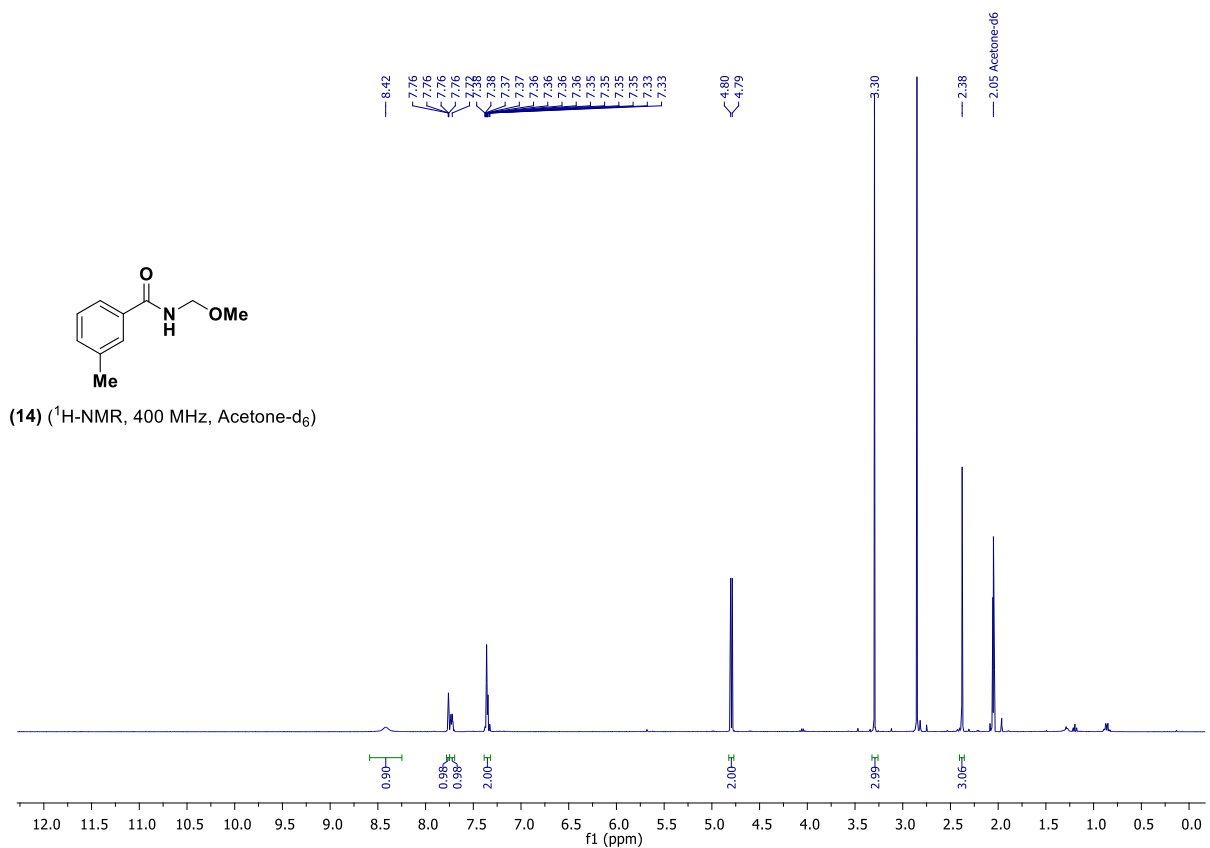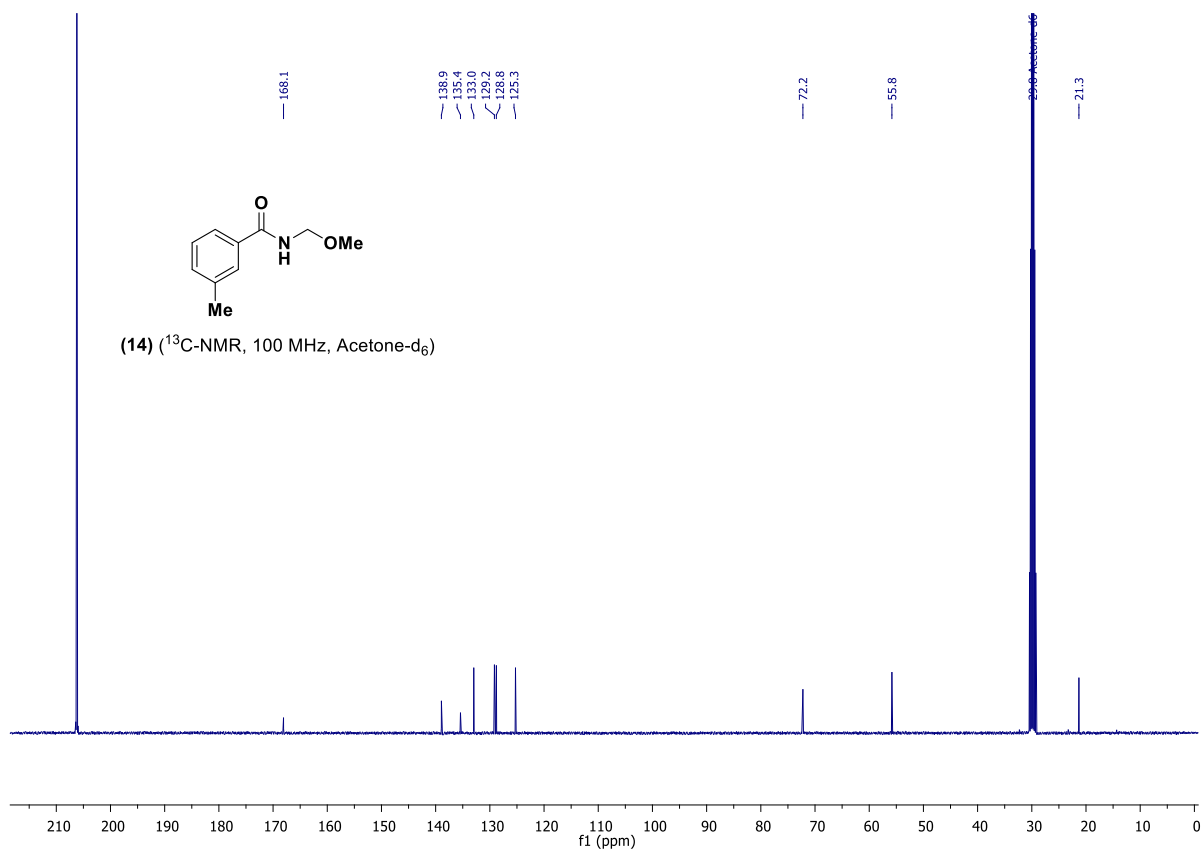

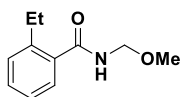

(15) ( $^1\text{H}$ -NMR, 400 MHz,  $\text{CDCl}_3$ )

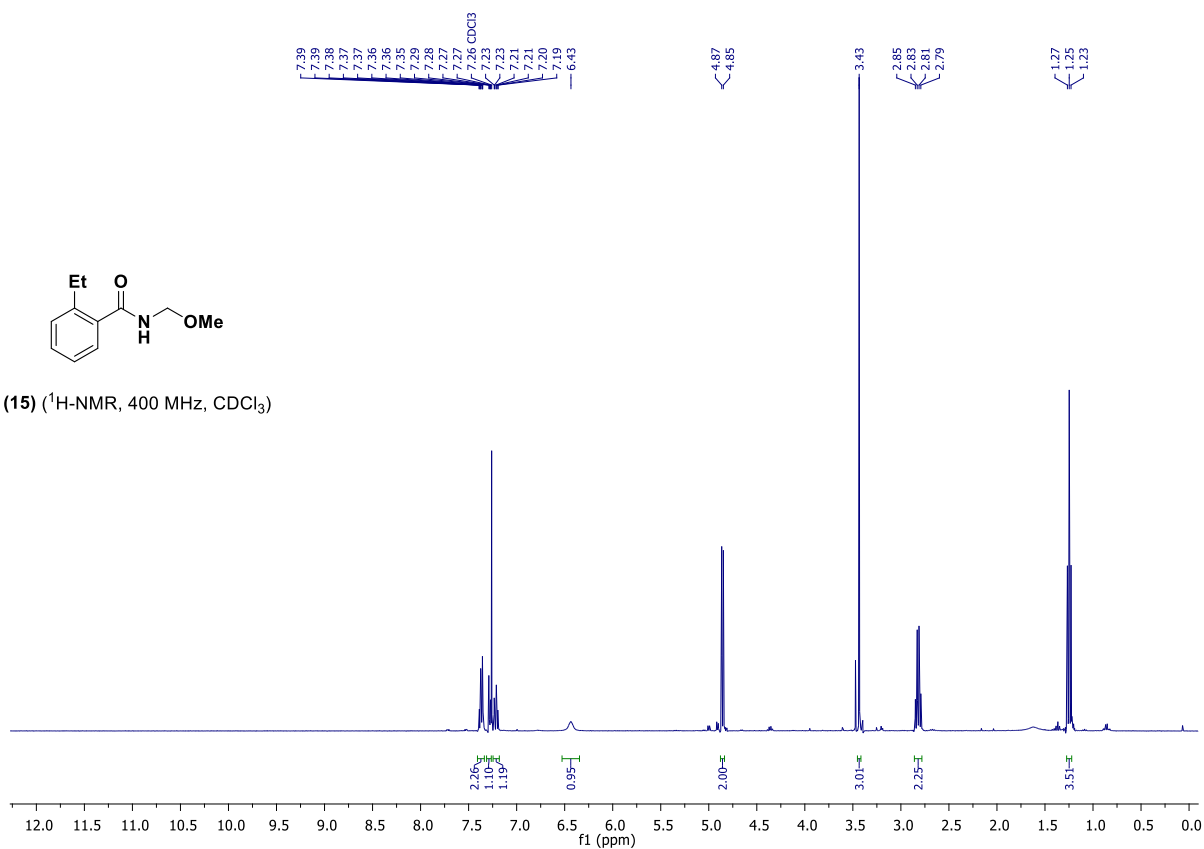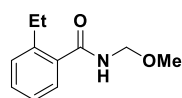

(15) ( $^{13}\text{C}$ -NMR, 100 MHz,  $\text{CDCl}_3$ )

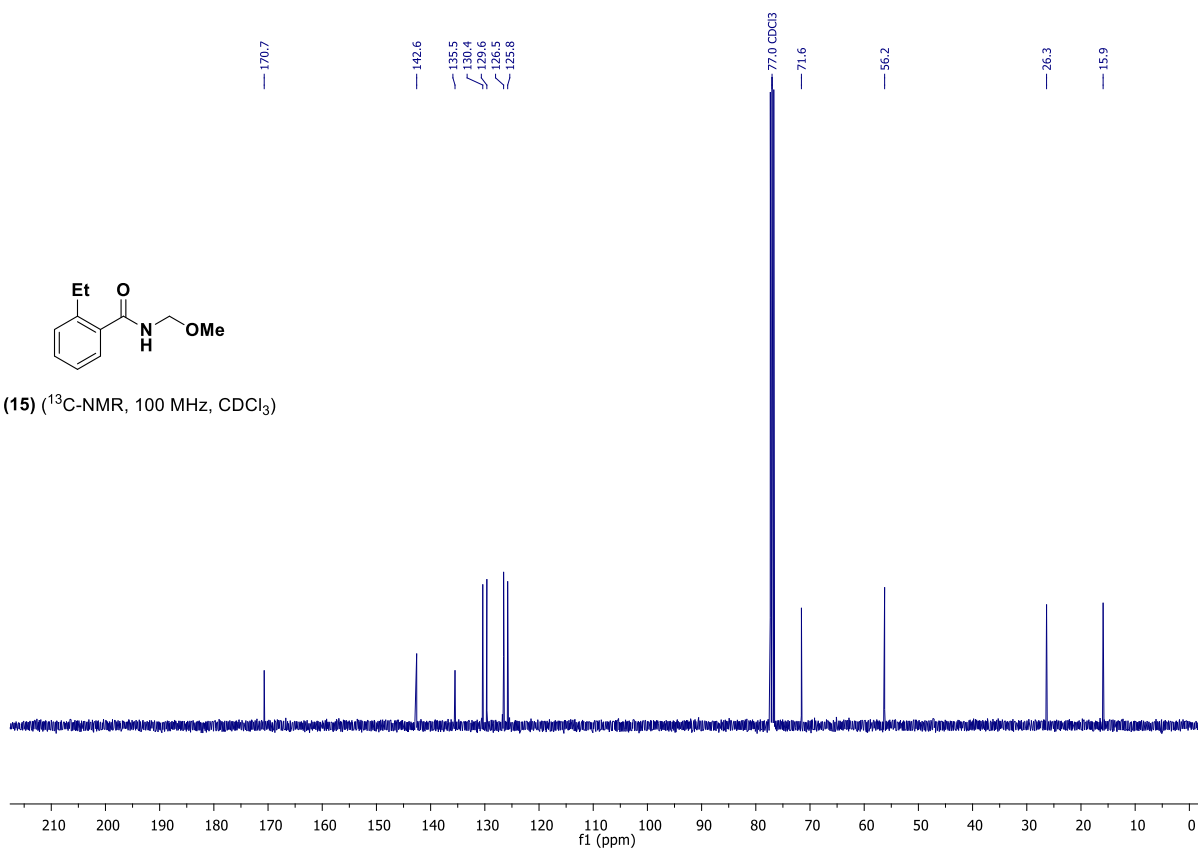

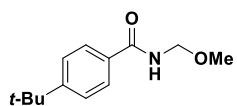

(16) ( $^1\text{H}$ -NMR, 400 MHz, Acetone- $\text{d}_6$ )

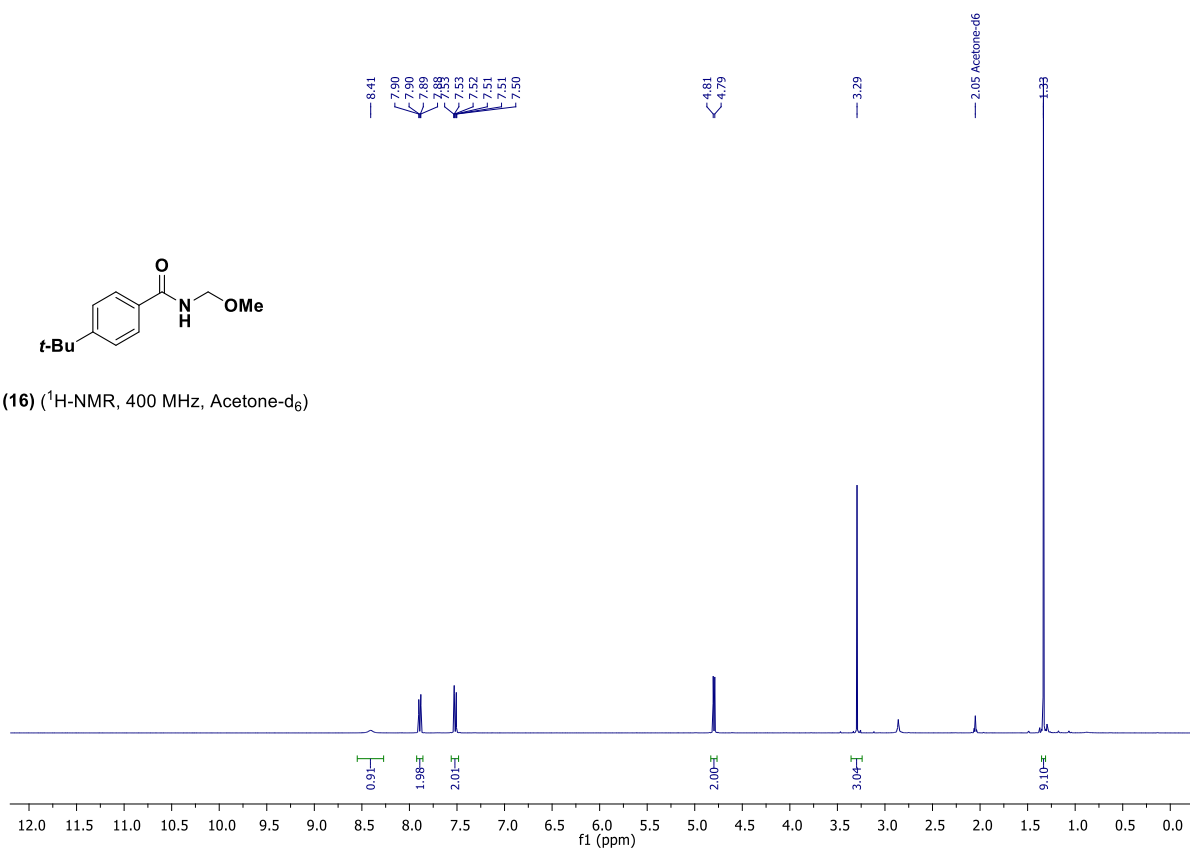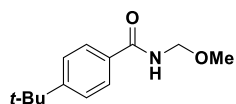

(16) ( $^{13}\text{C}$ -NMR, 100 MHz, Acetone- $\text{d}_6$ )

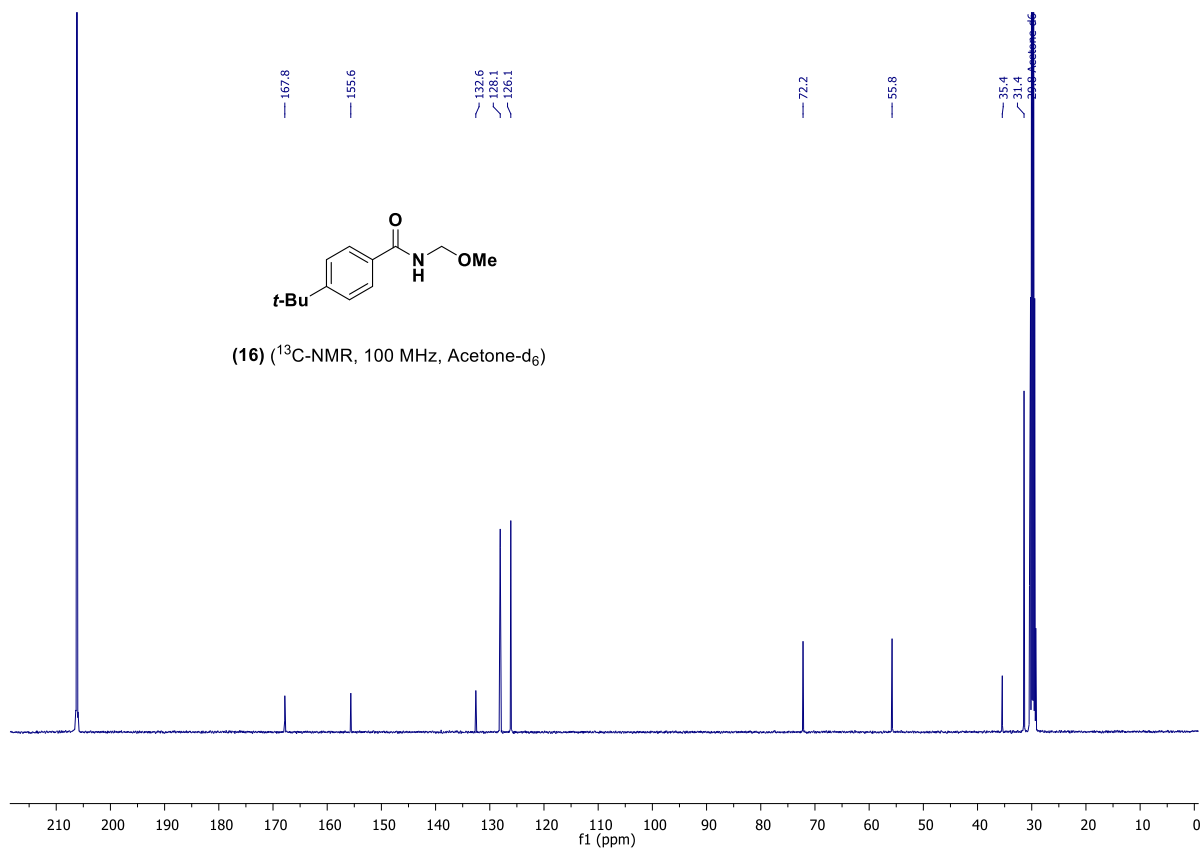

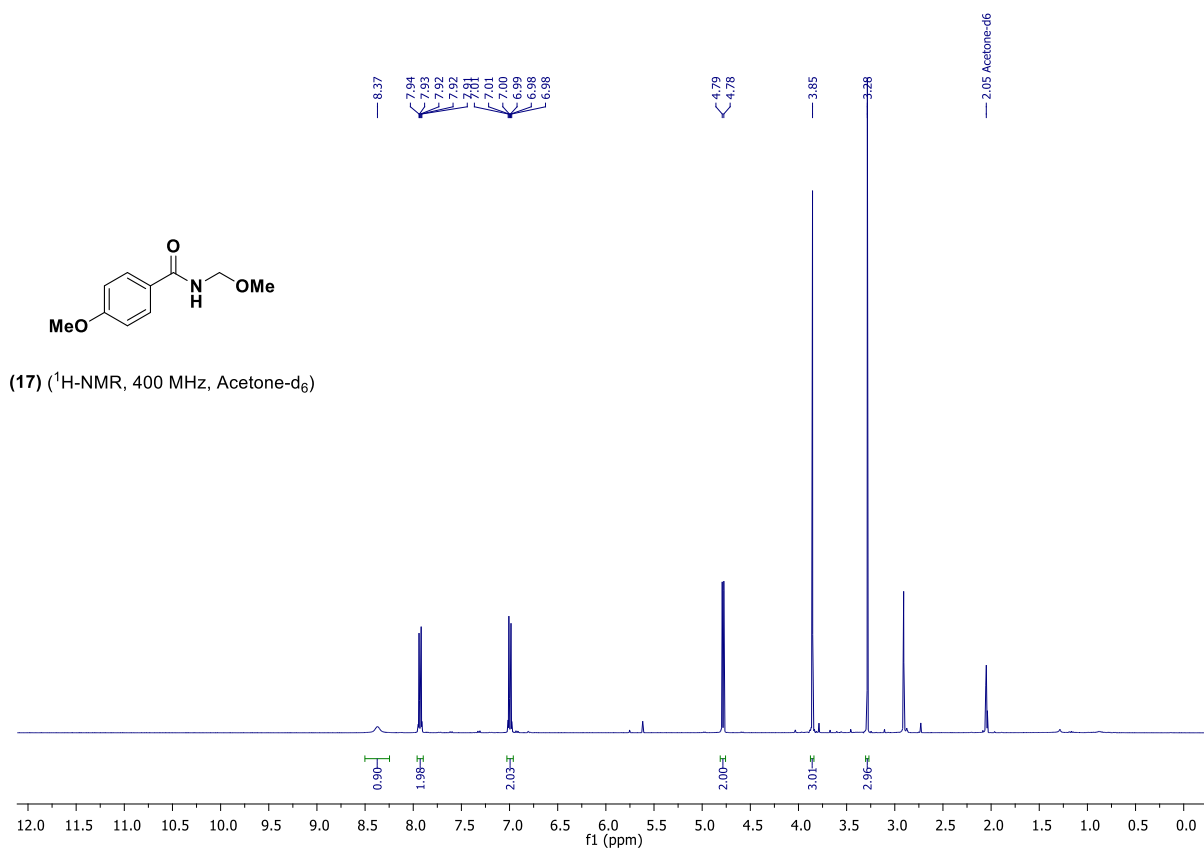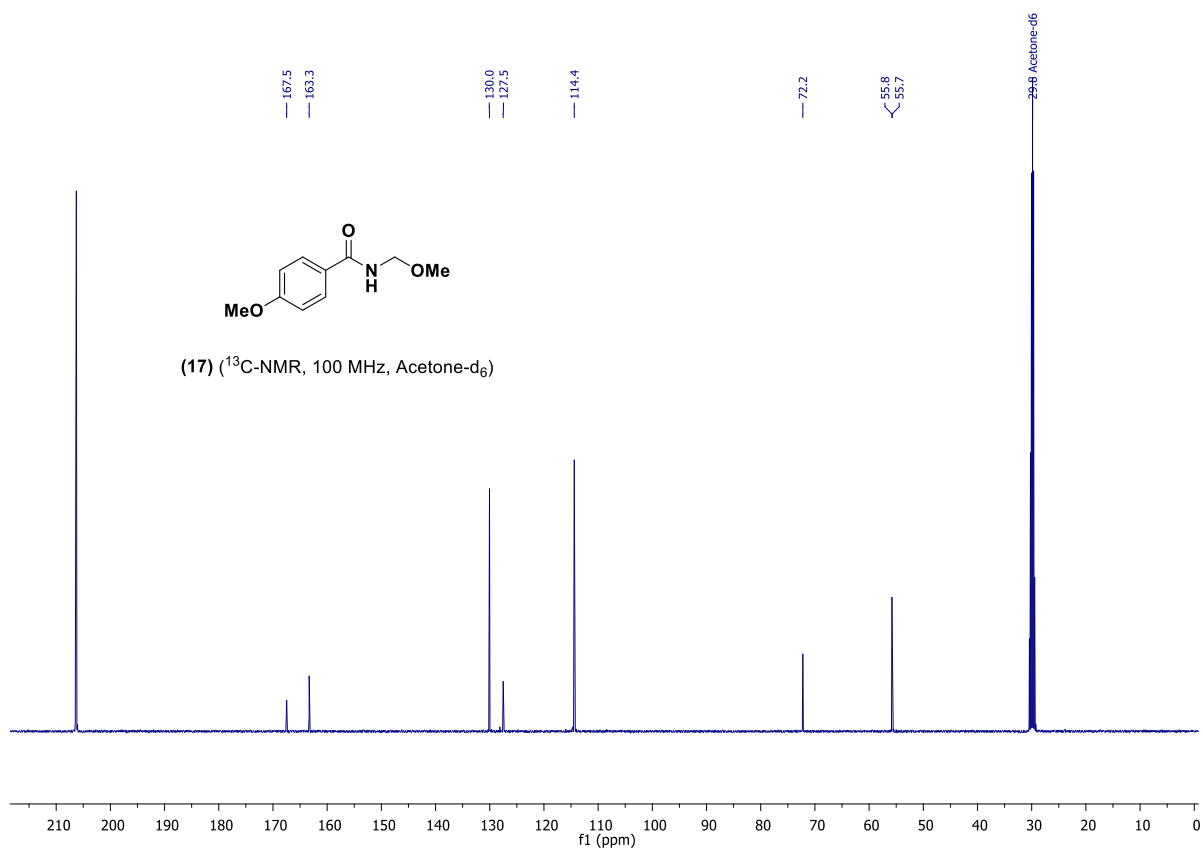

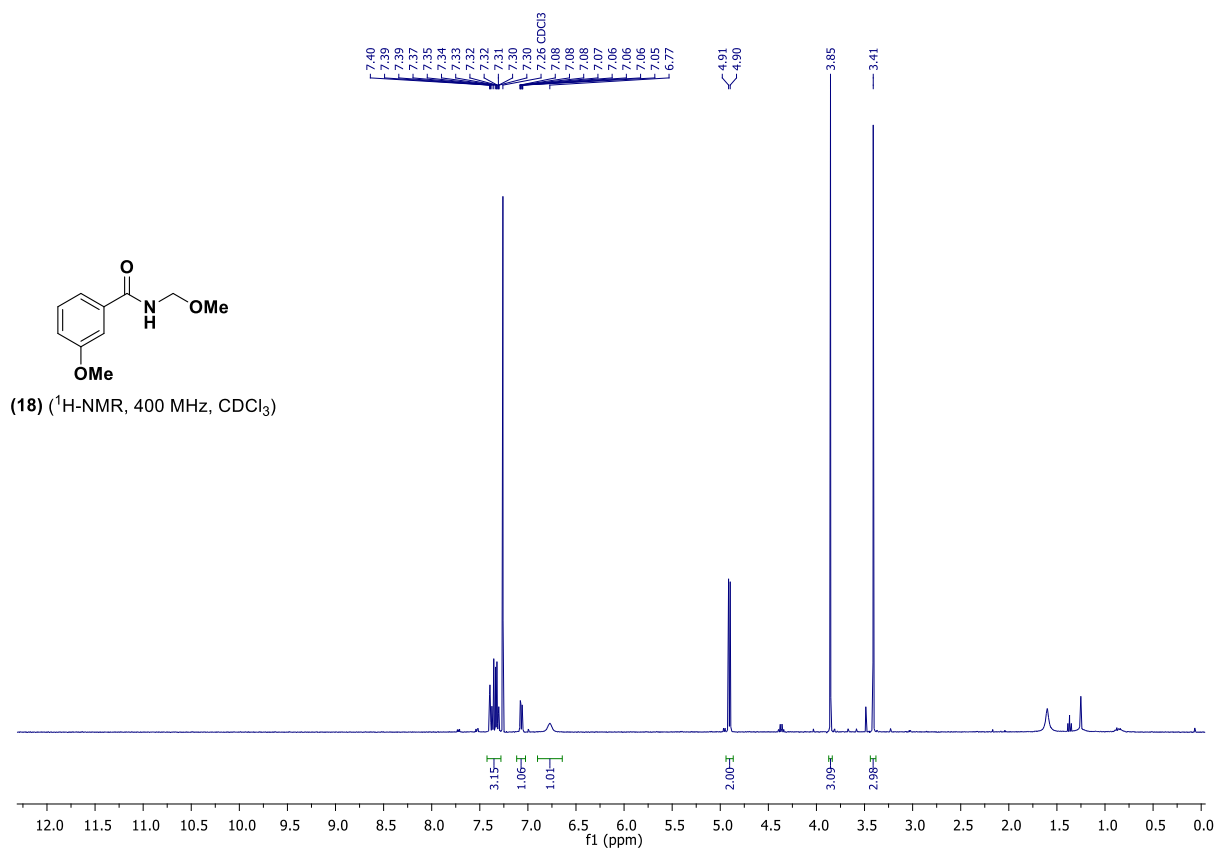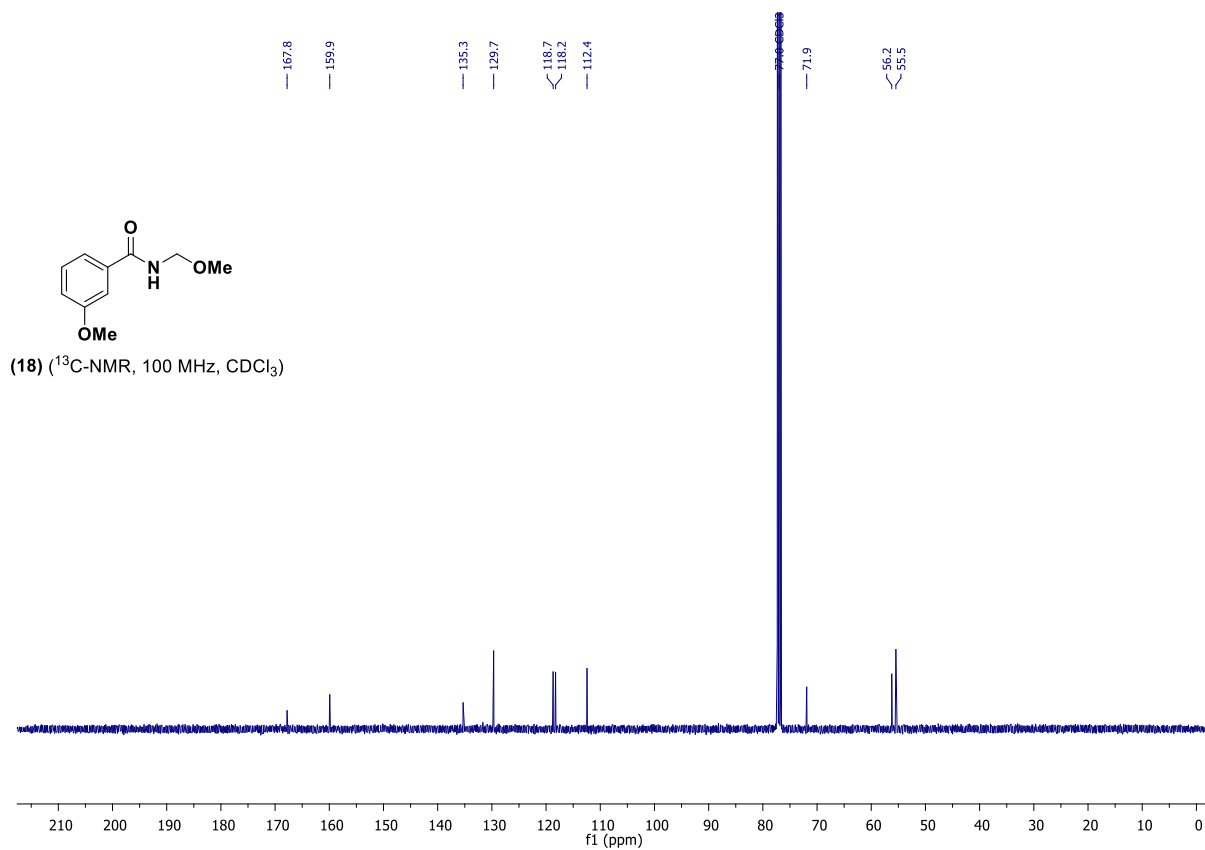

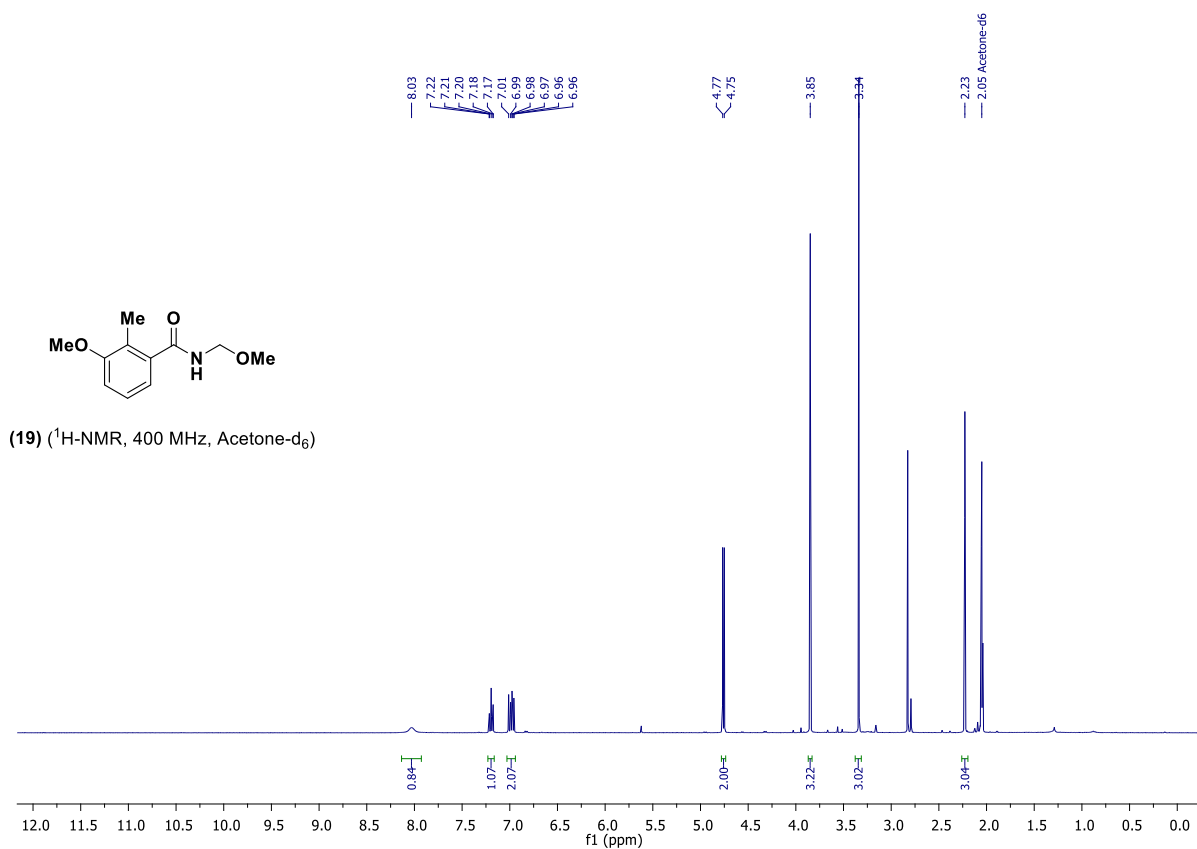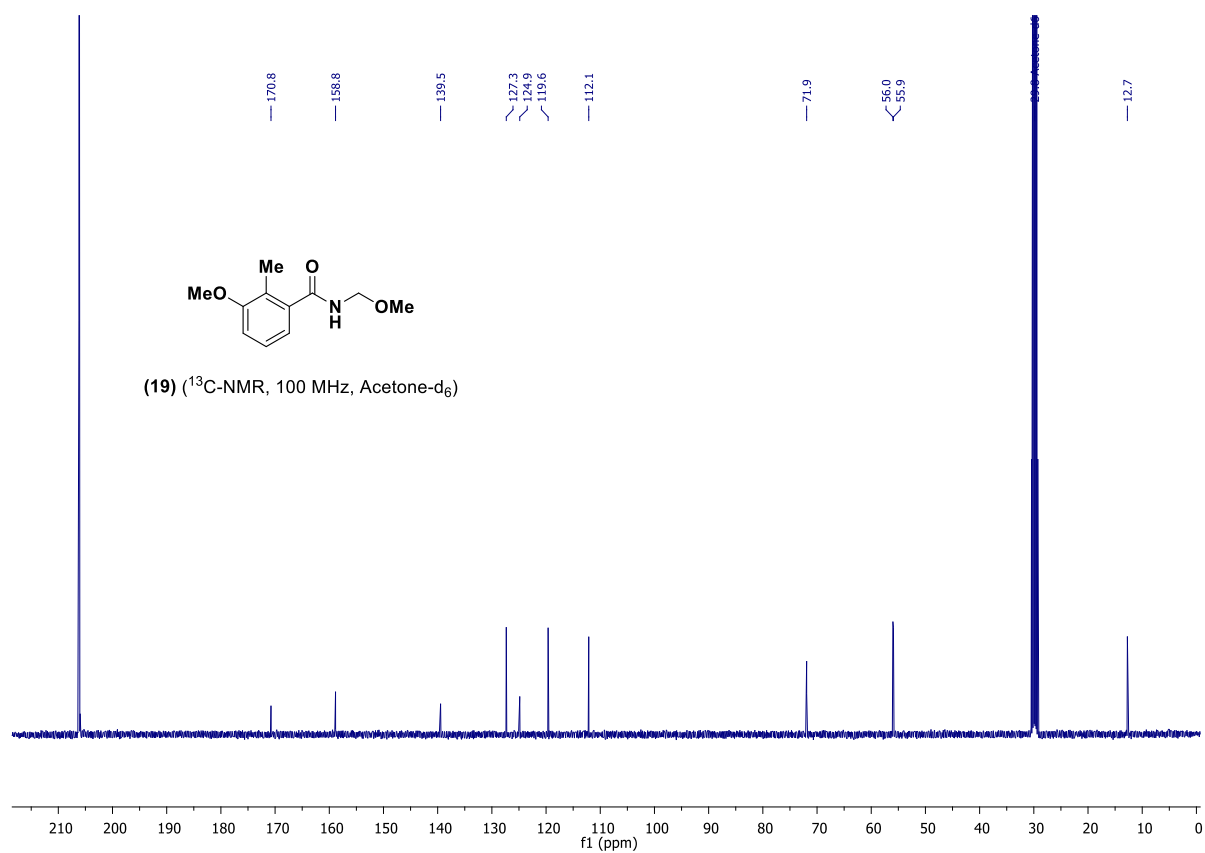

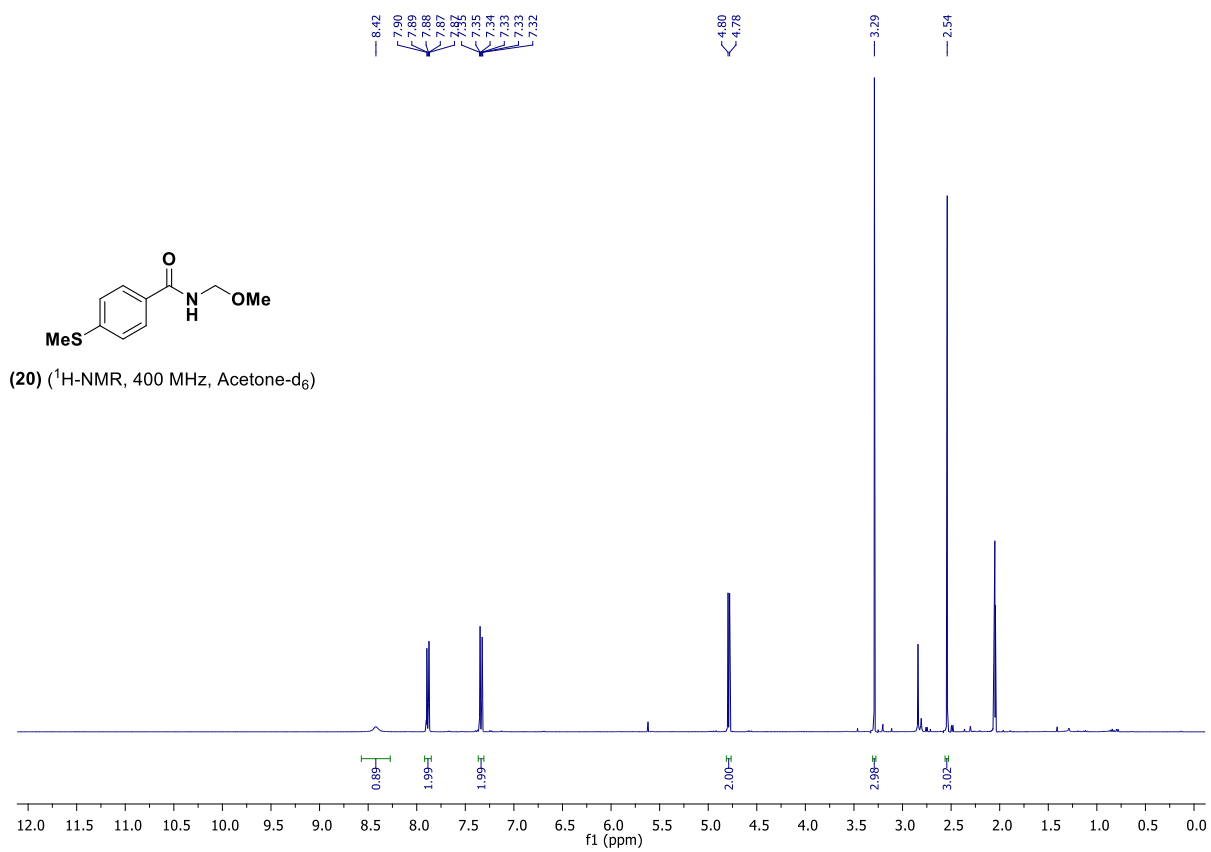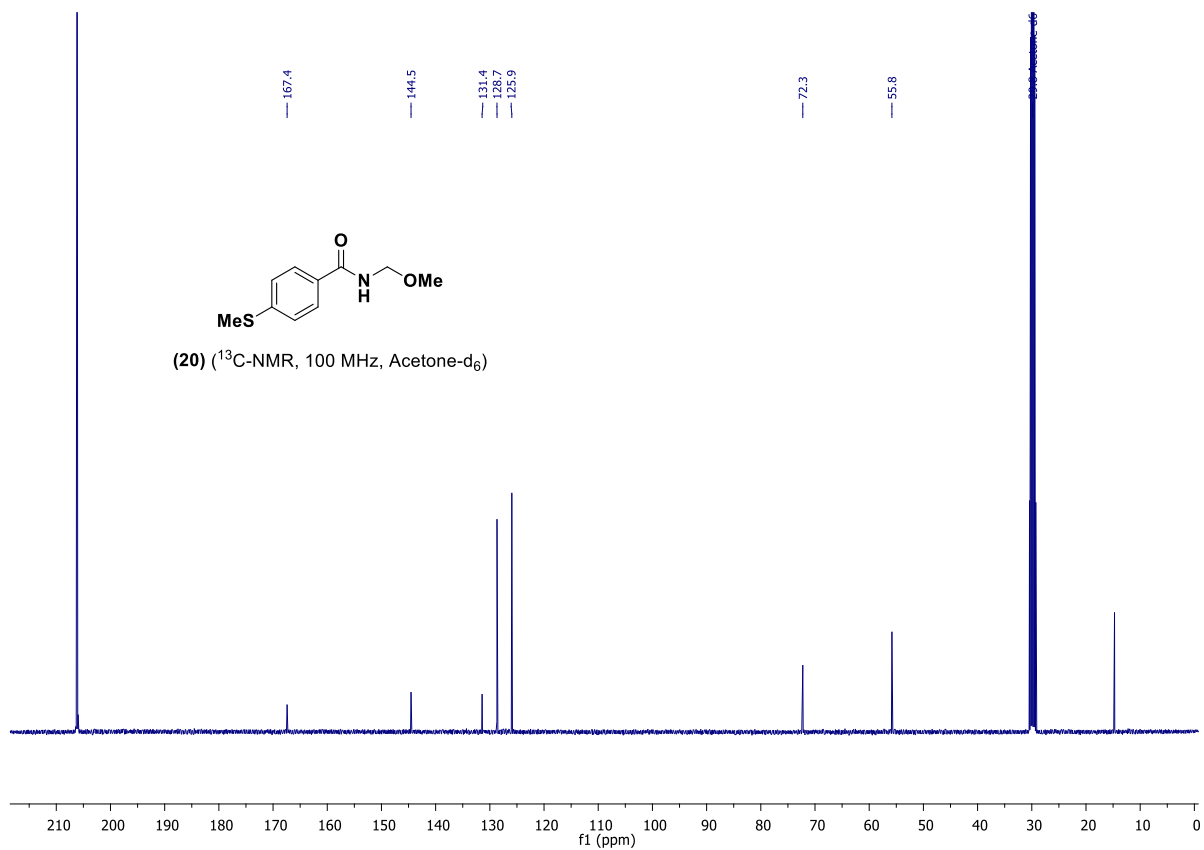

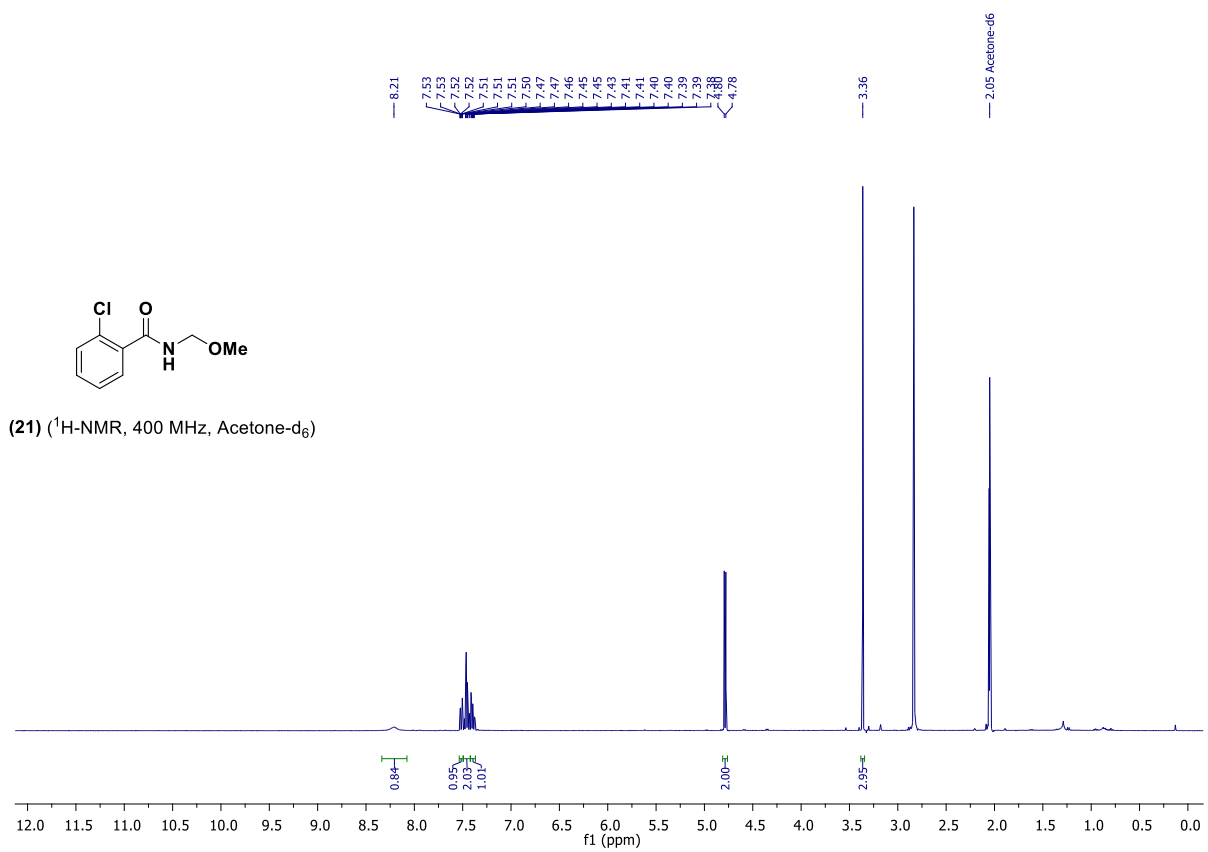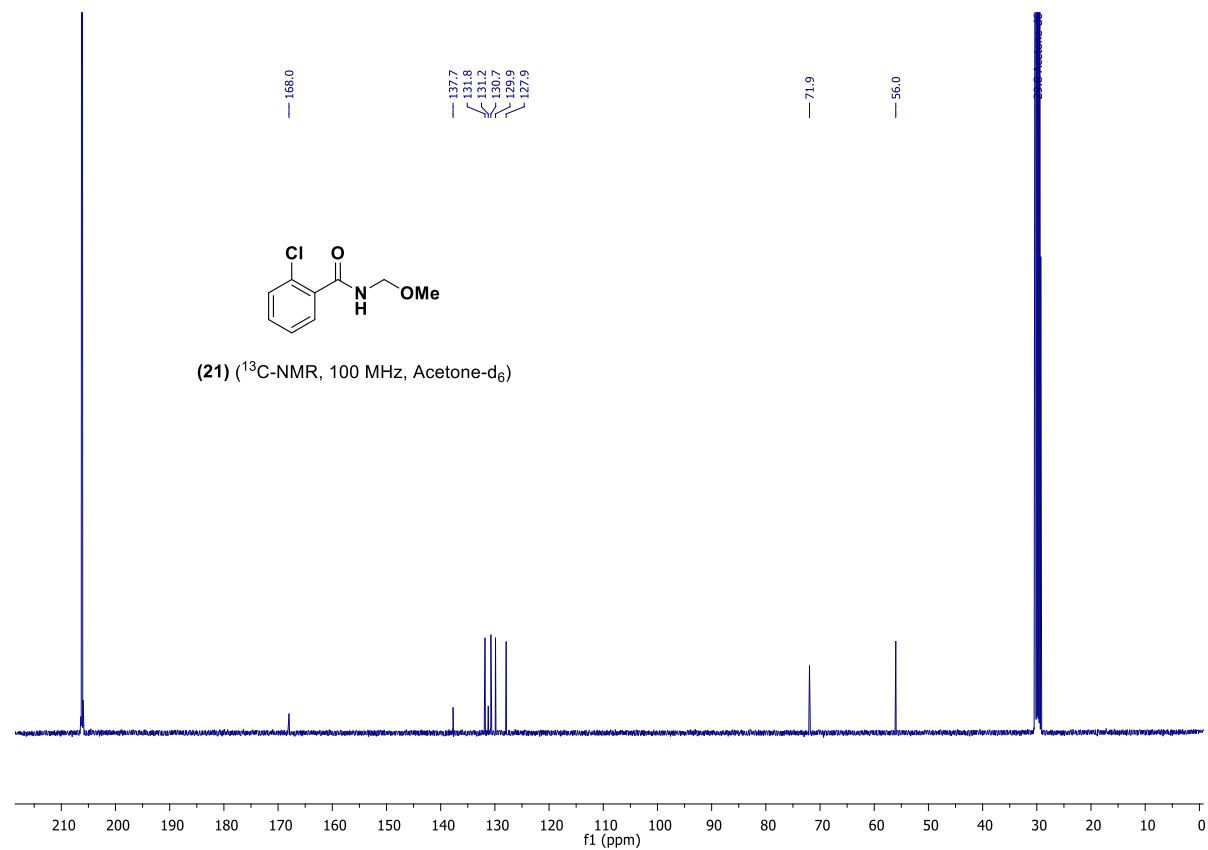

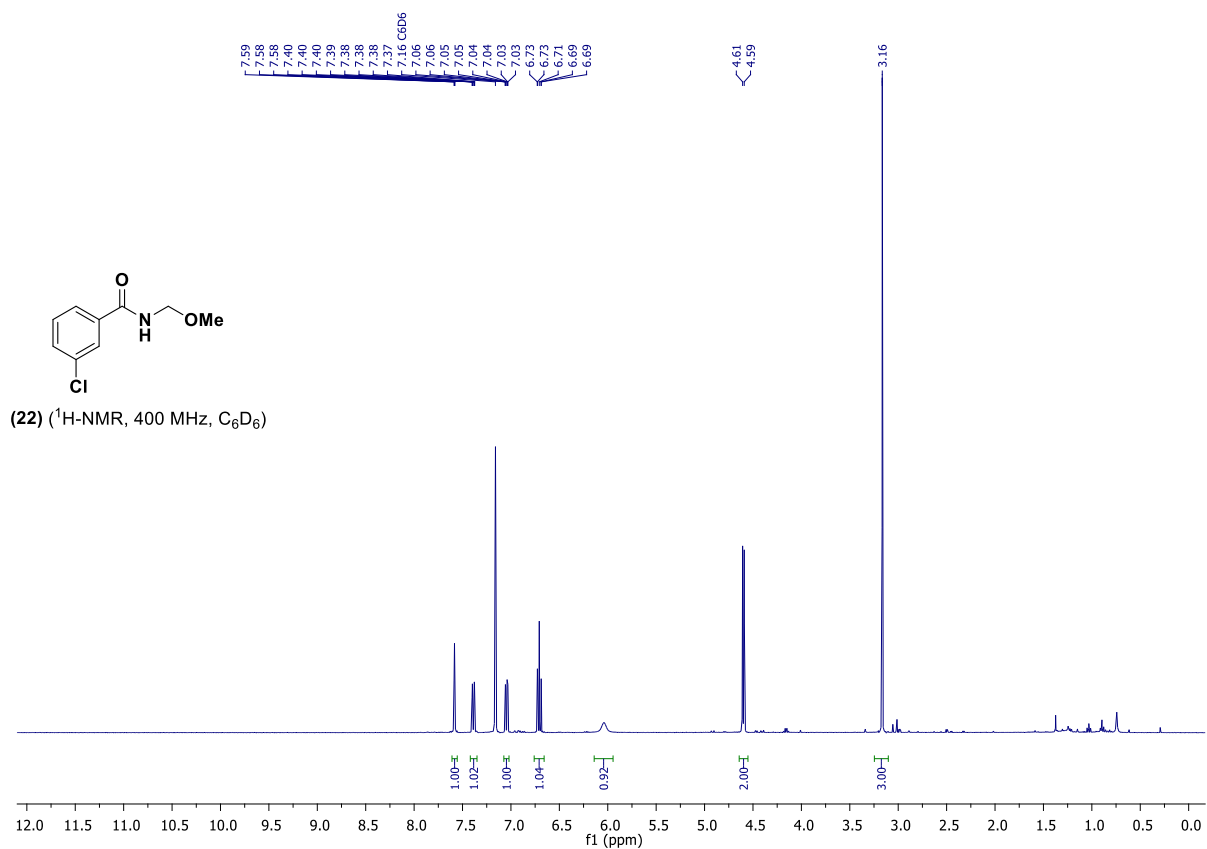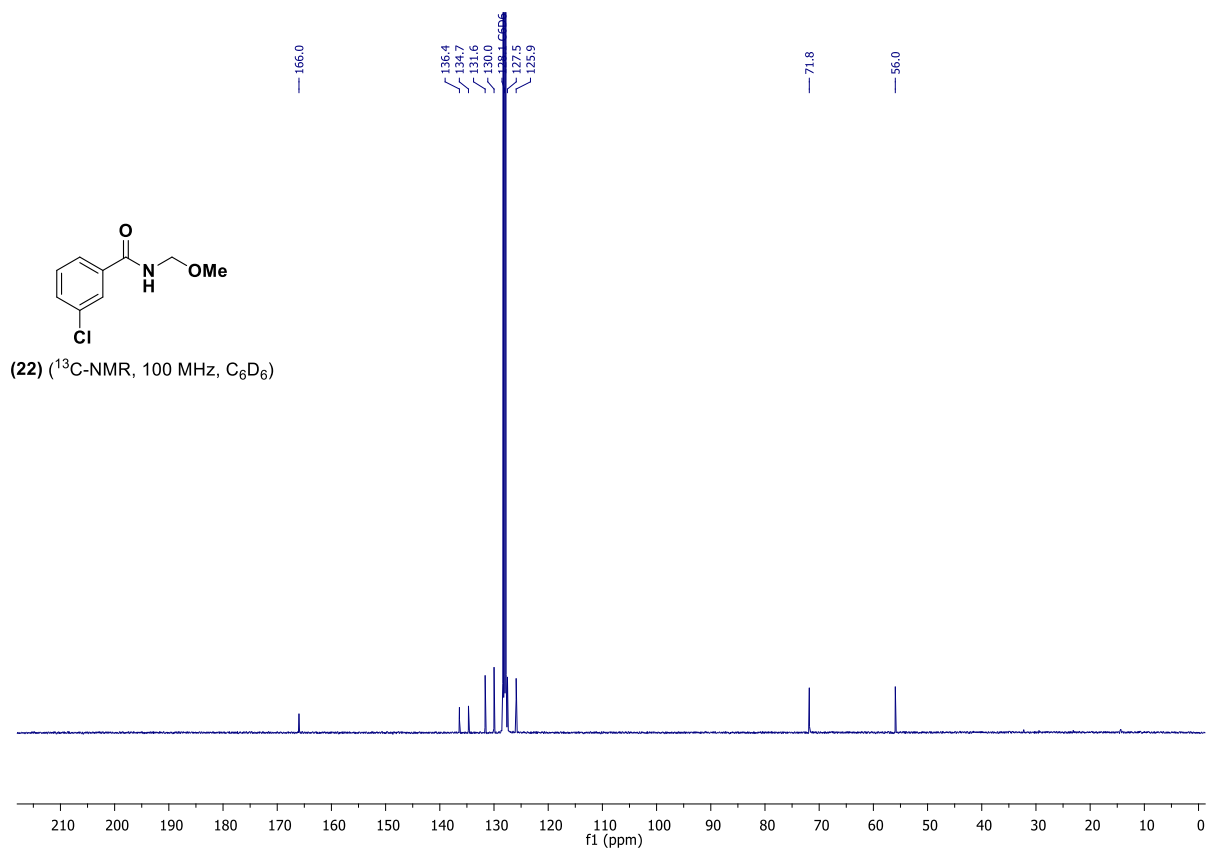

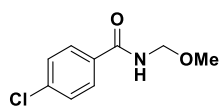

(23) ( $^1\text{H}$ -NMR, 400 MHz, Acetone- $\text{d}_6$ )

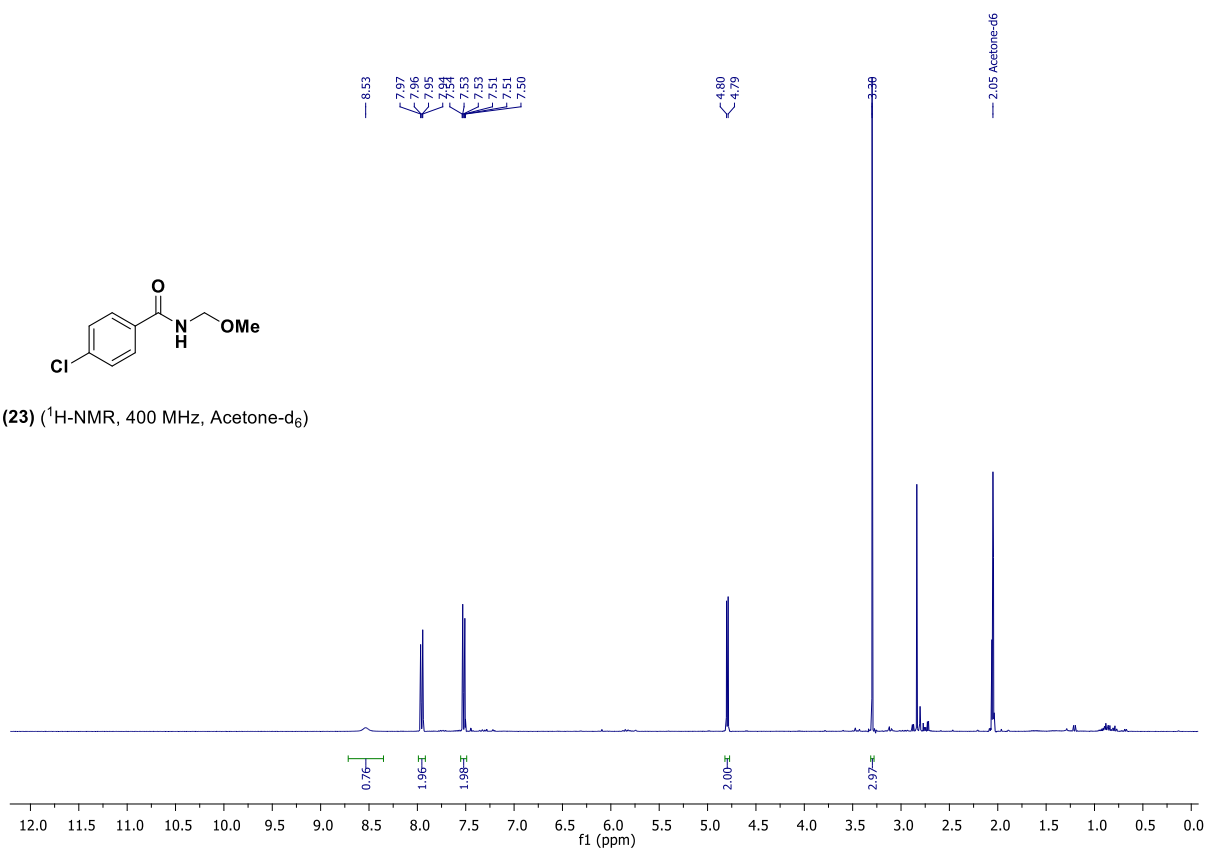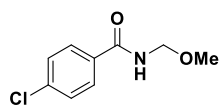

(23) ( $^{13}\text{C}$ -NMR, 100 MHz, Acetone- $\text{d}_6$ )

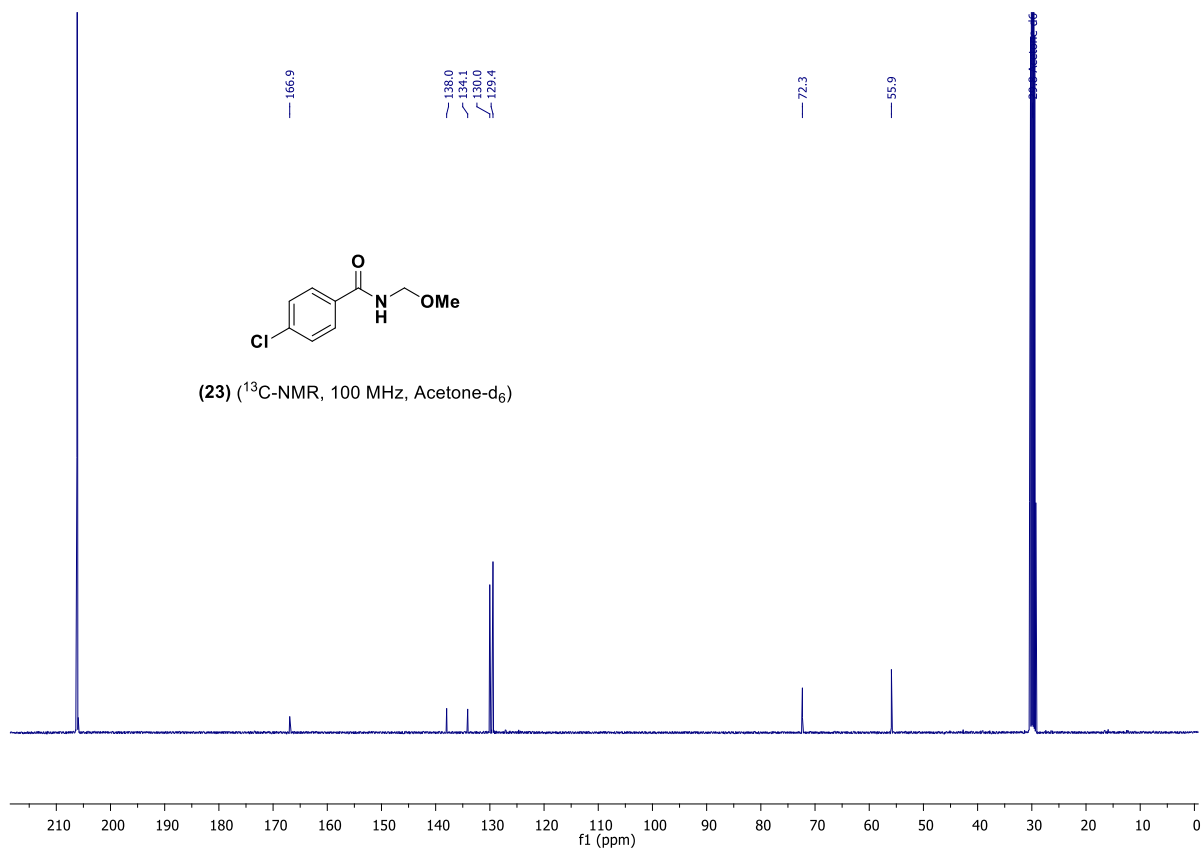

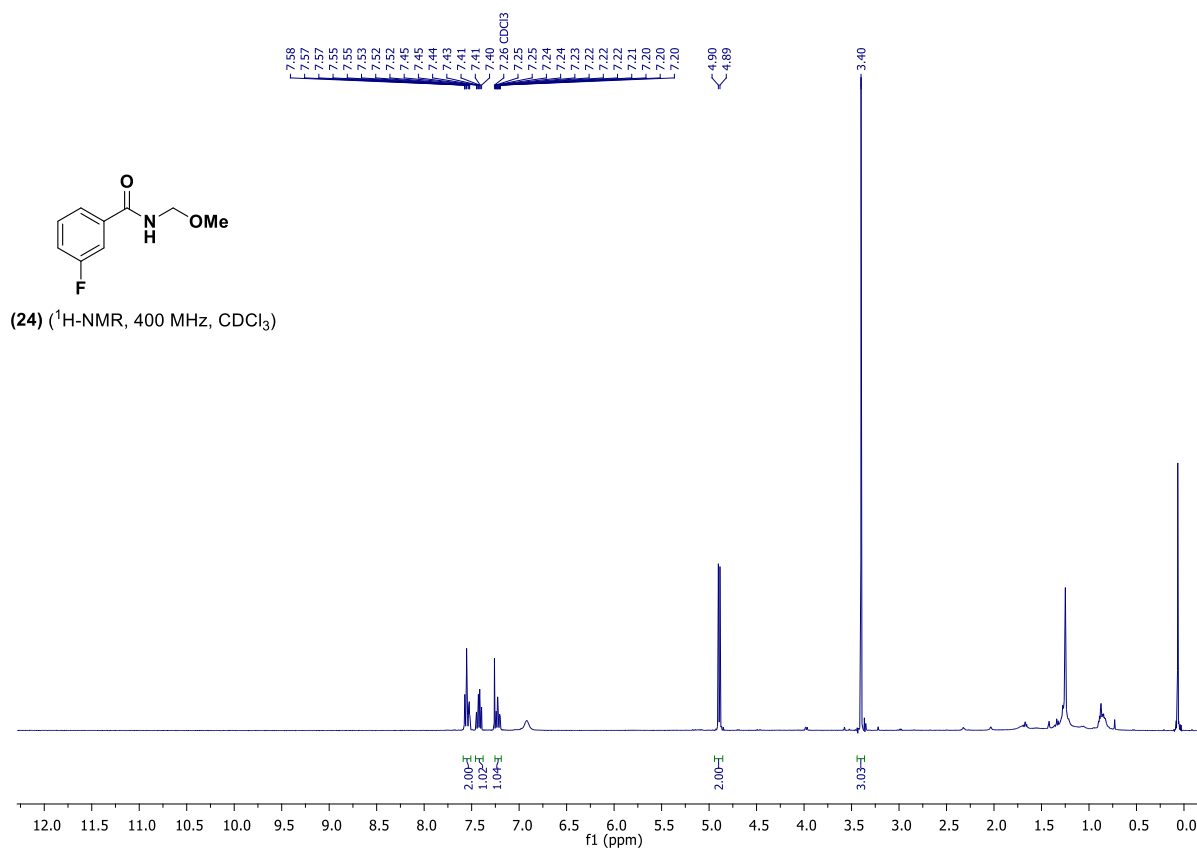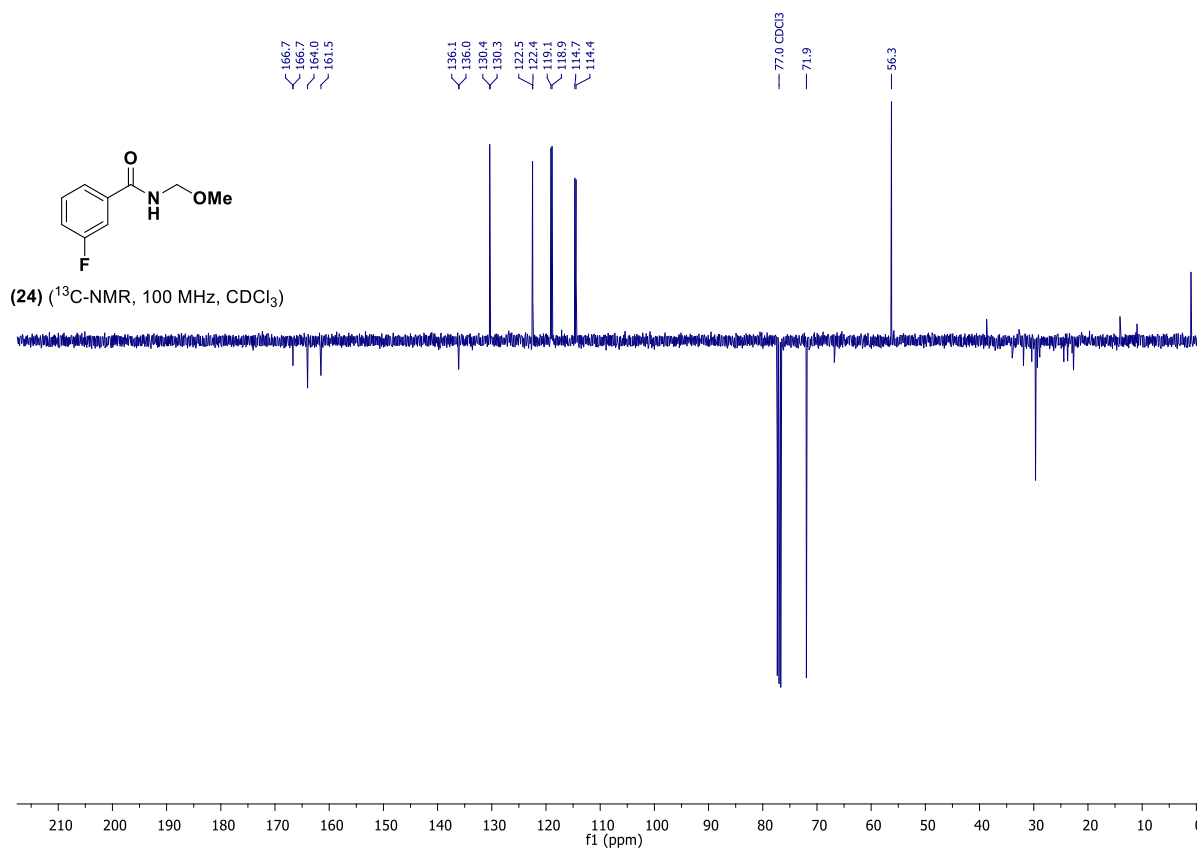

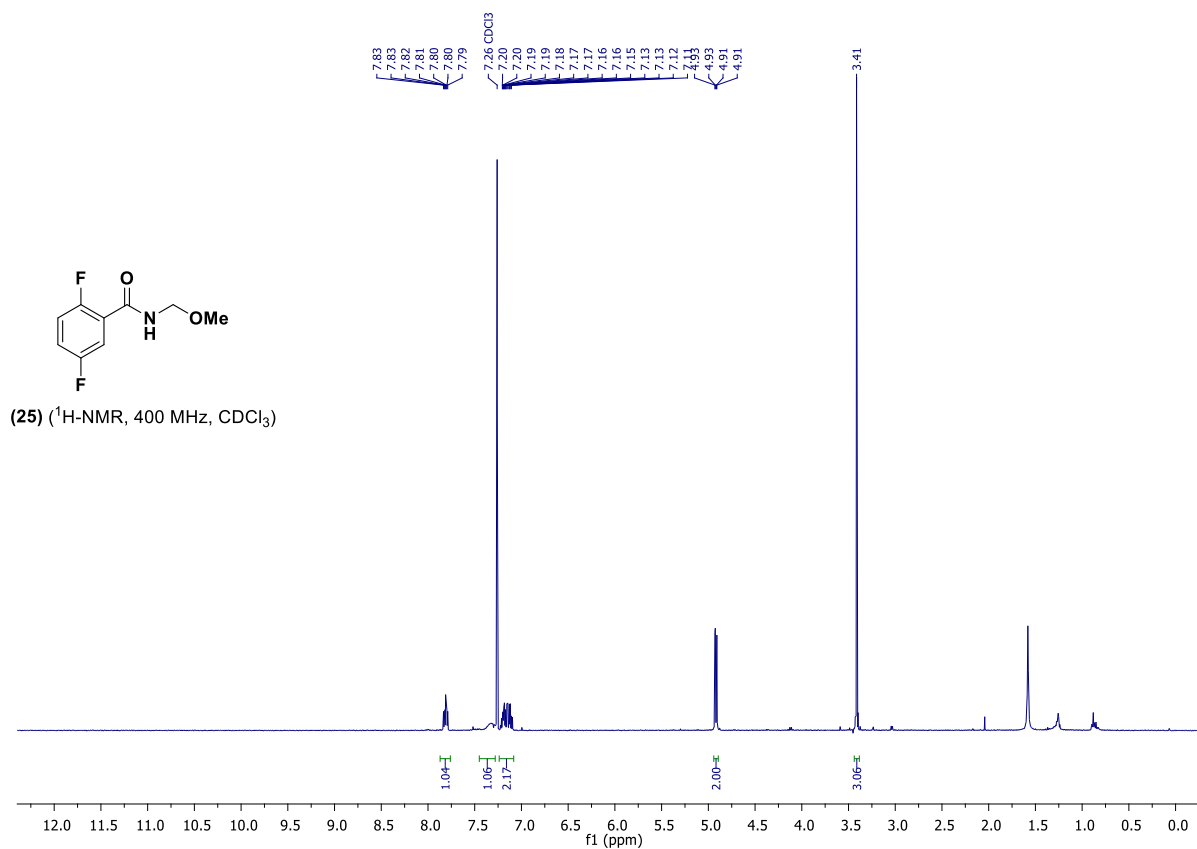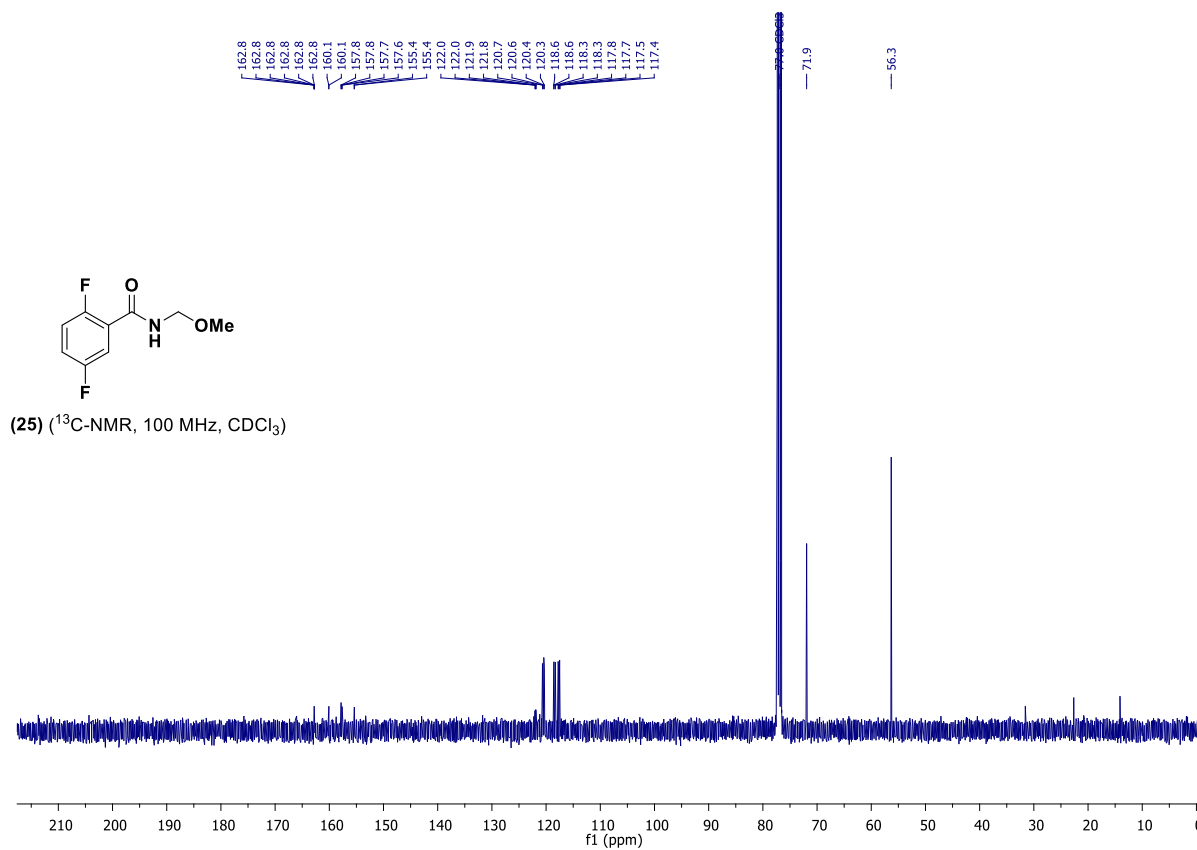

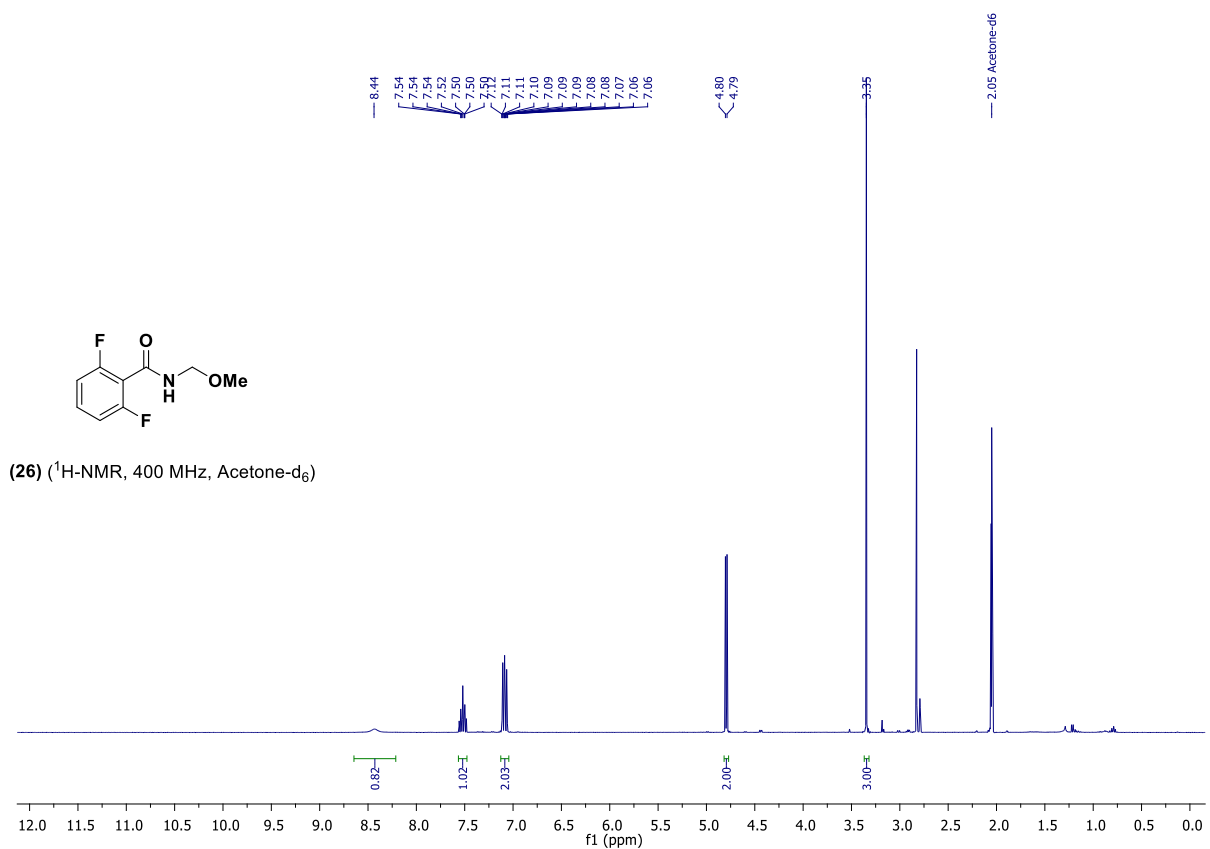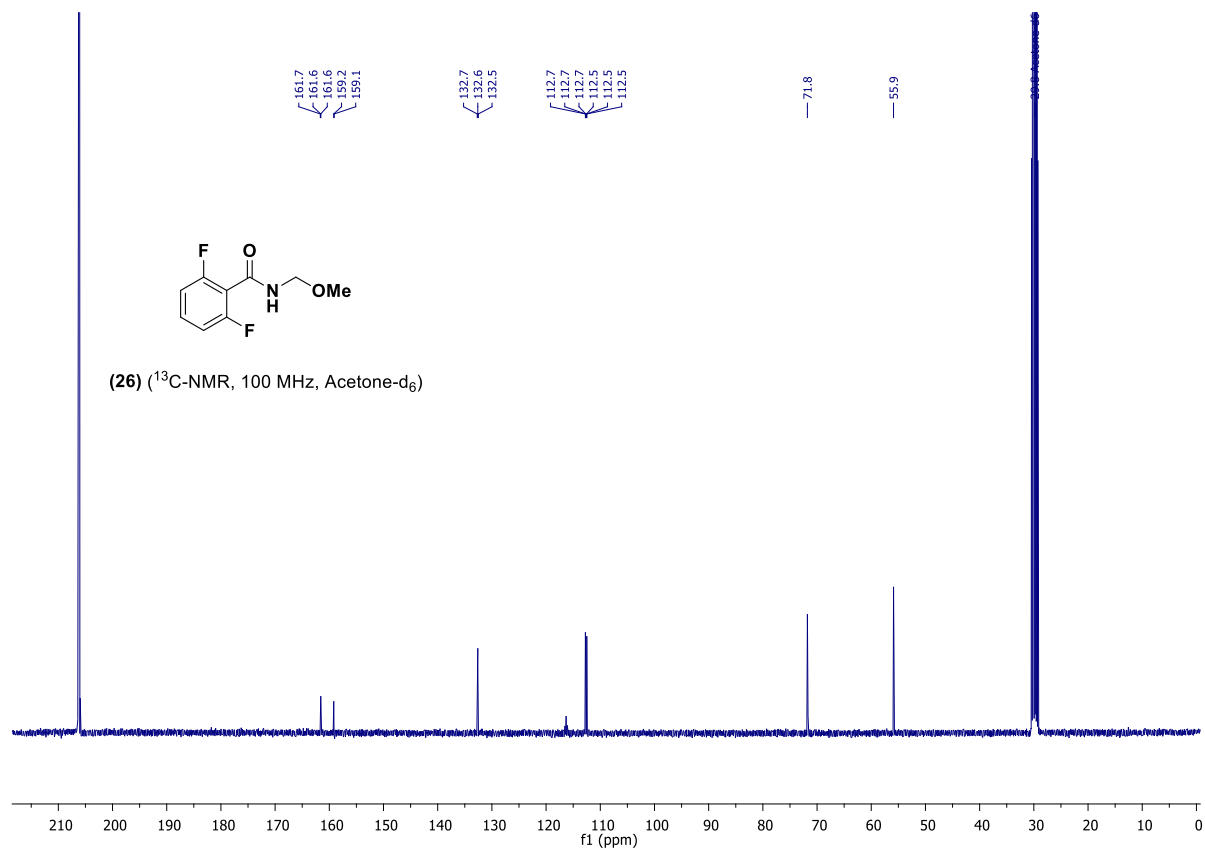

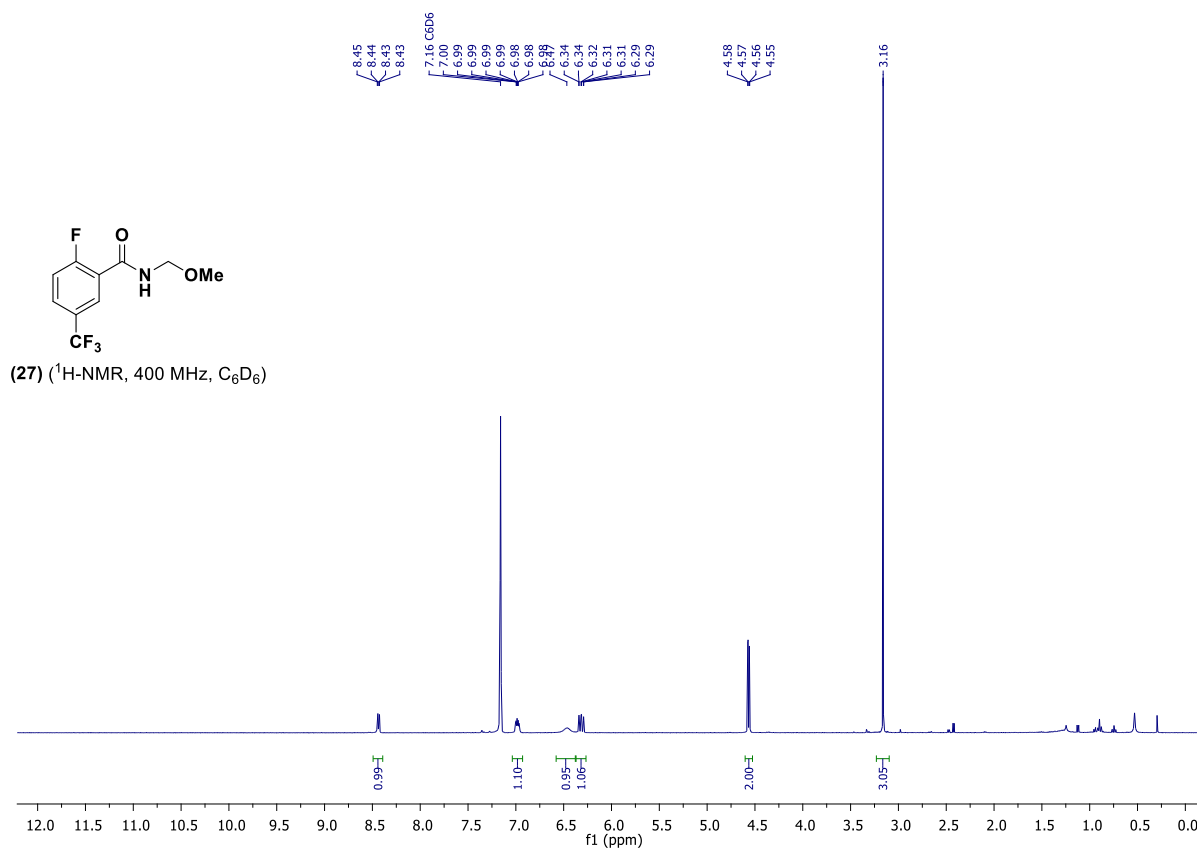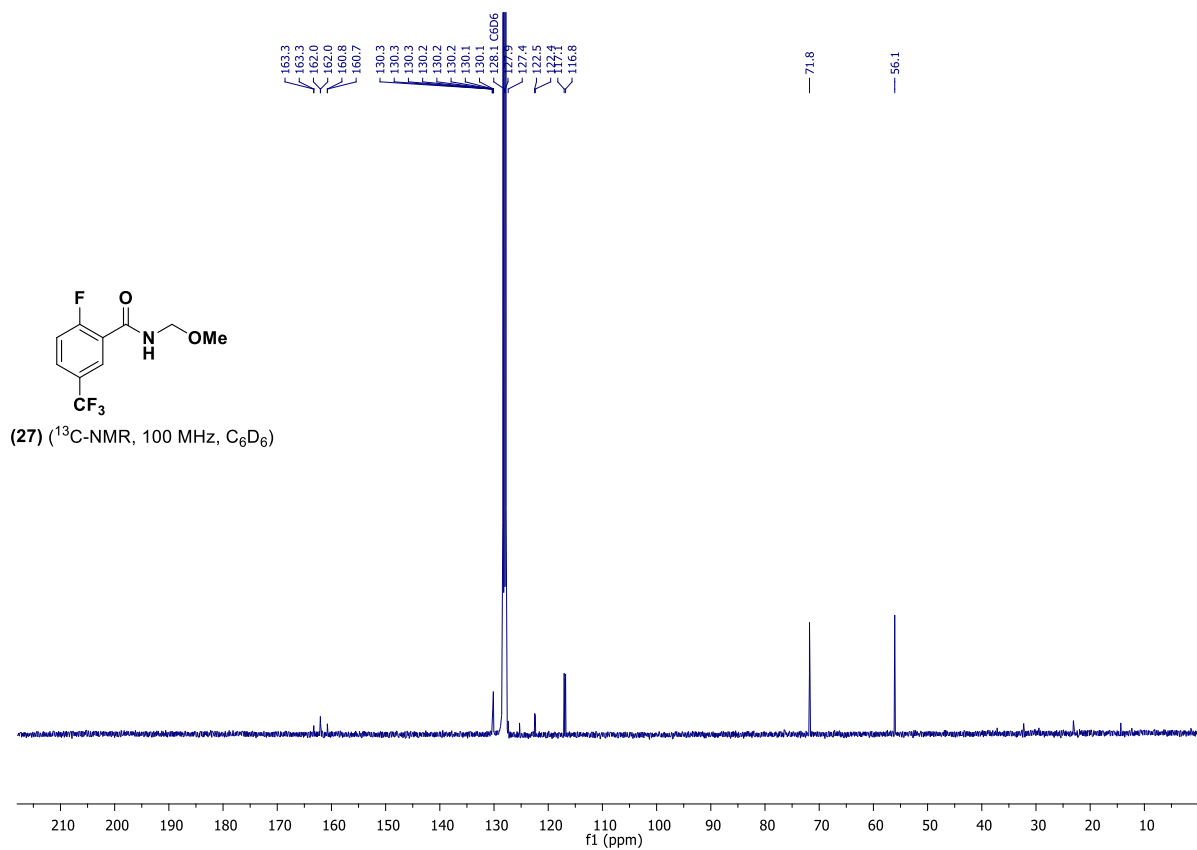

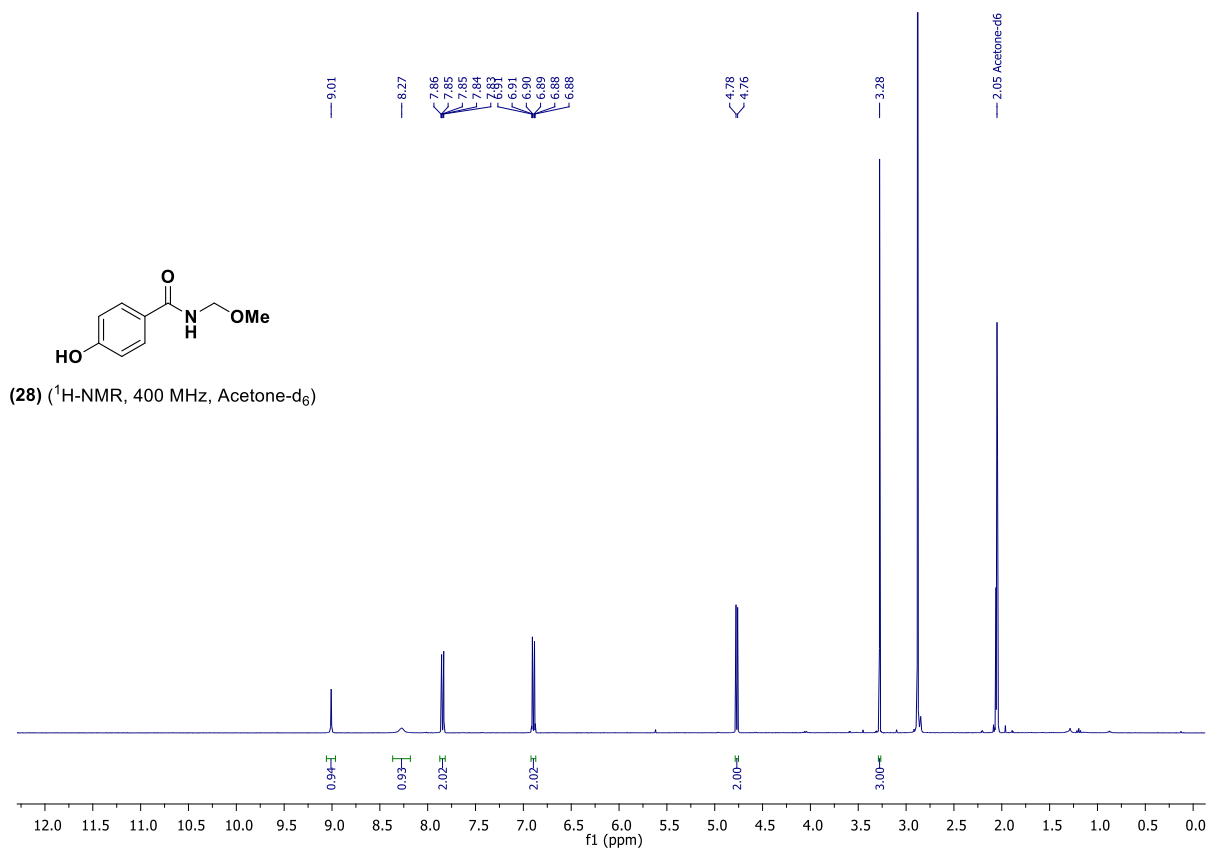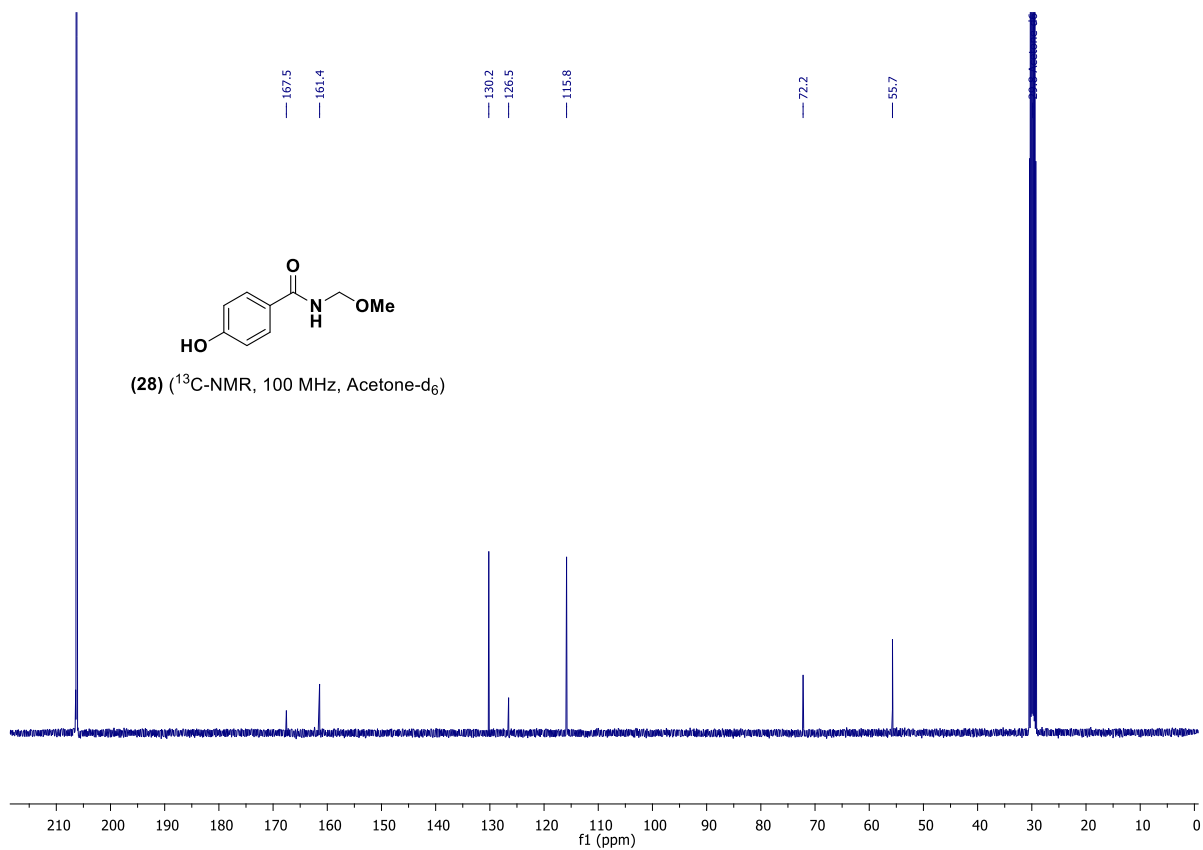

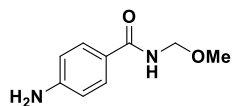

(29) ( $^1\text{H}$ -NMR, 400 MHz, Acetone- $\text{d}_6$ )

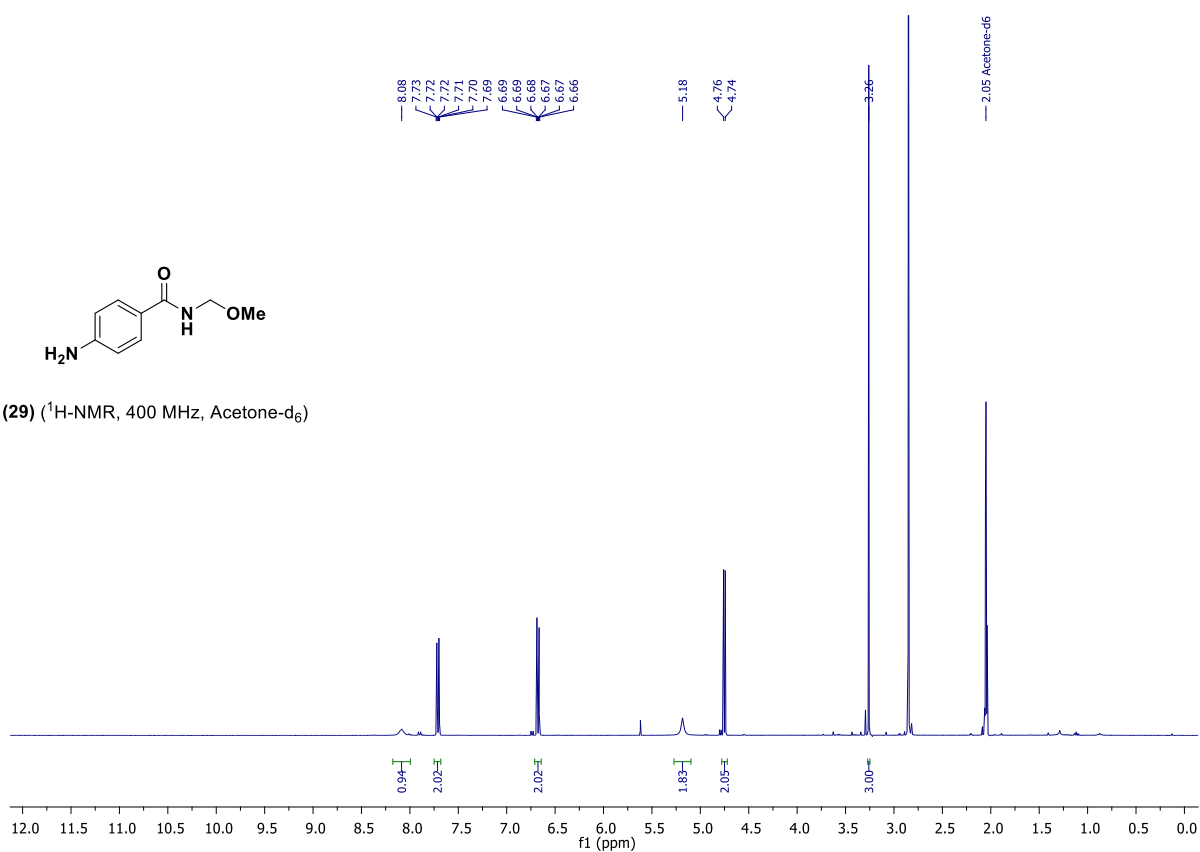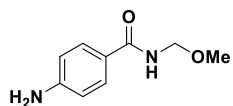

(29) ( $^{13}\text{C}$ -NMR, 100 MHz, Acetone- $\text{d}_6$ )

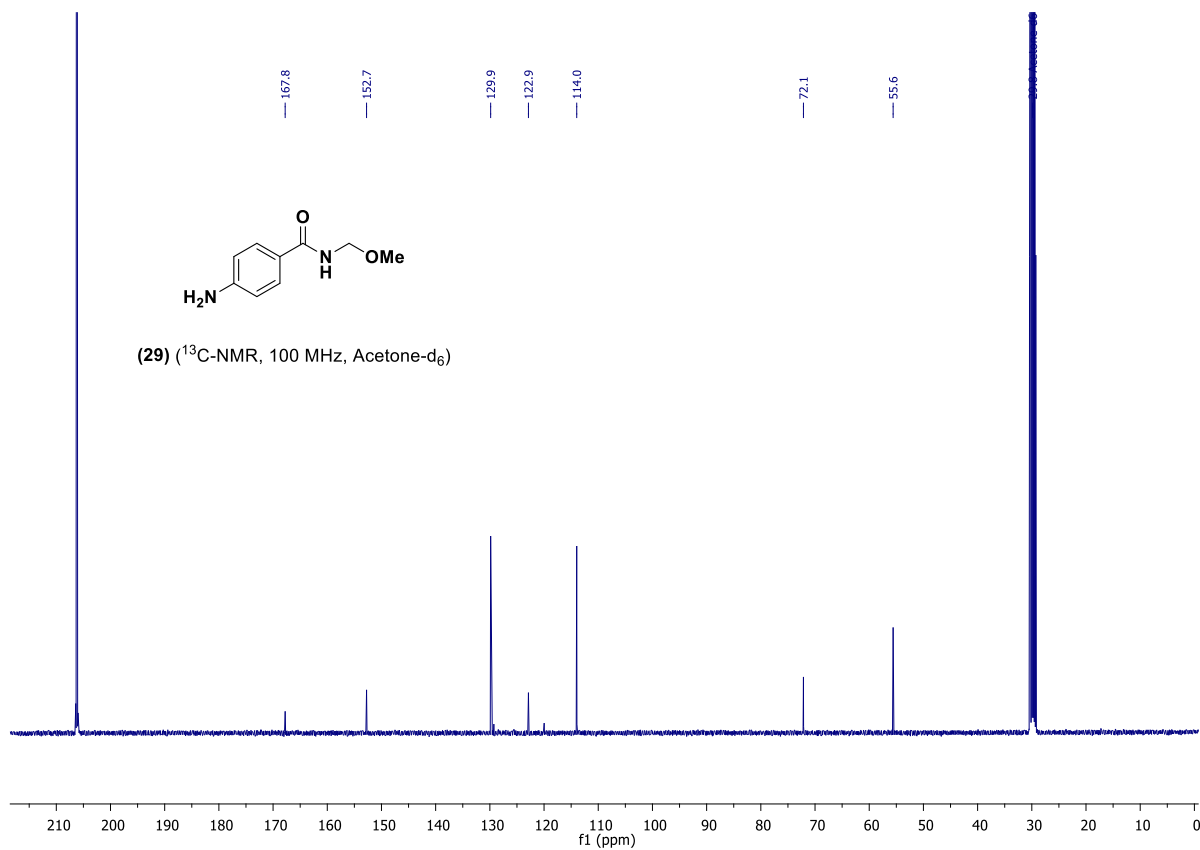

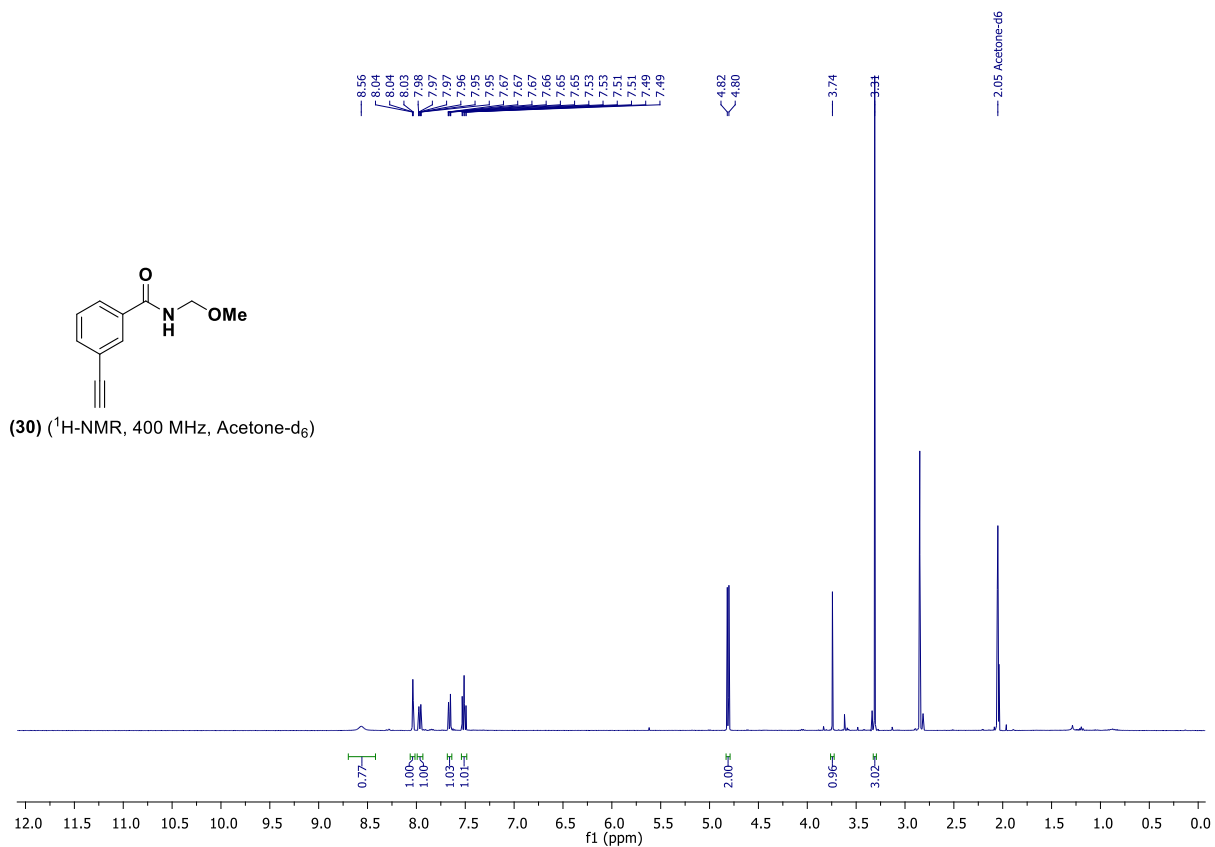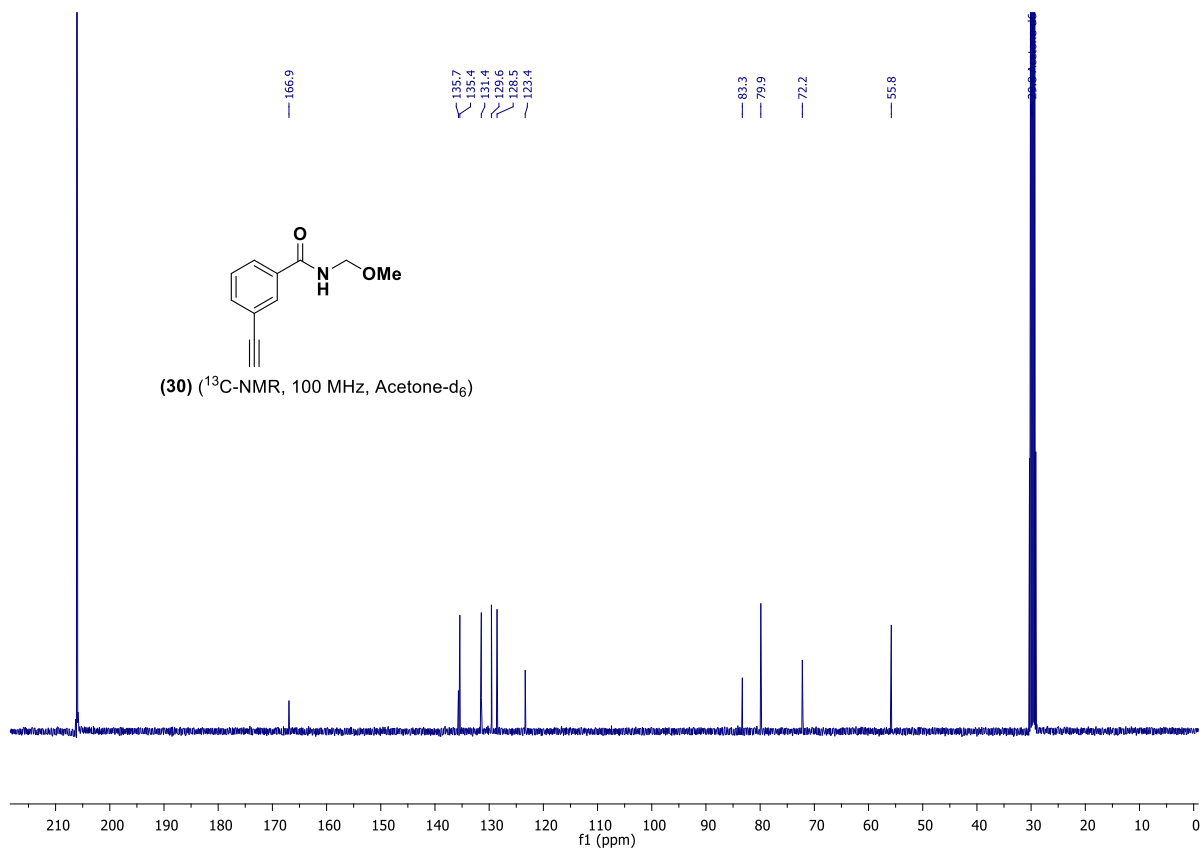

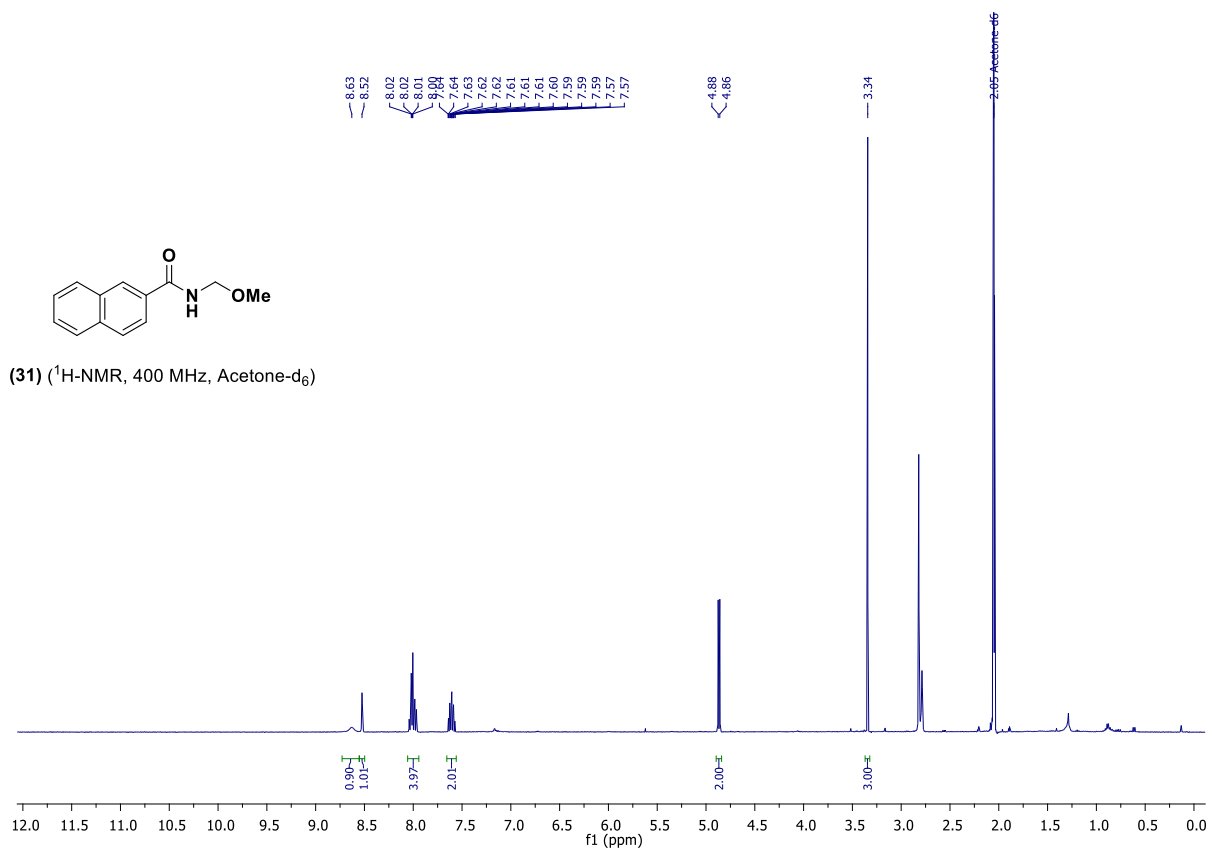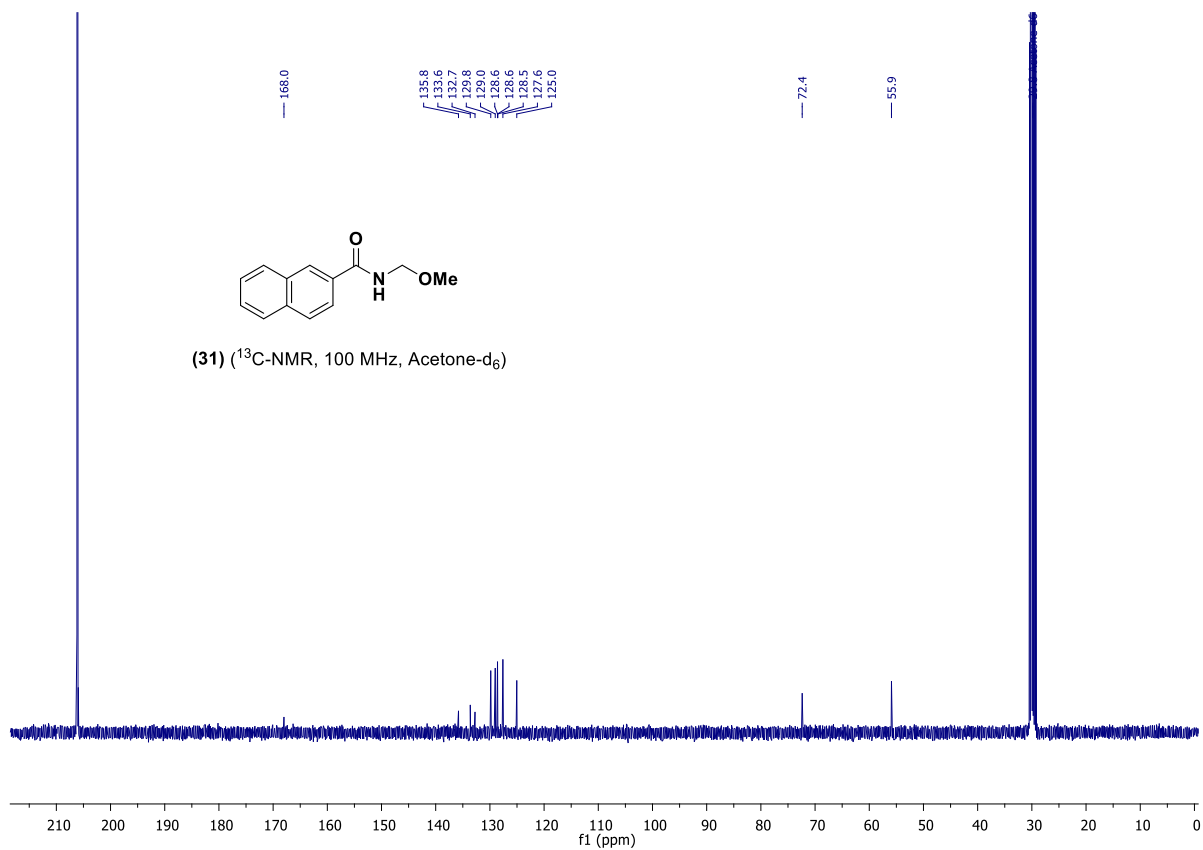

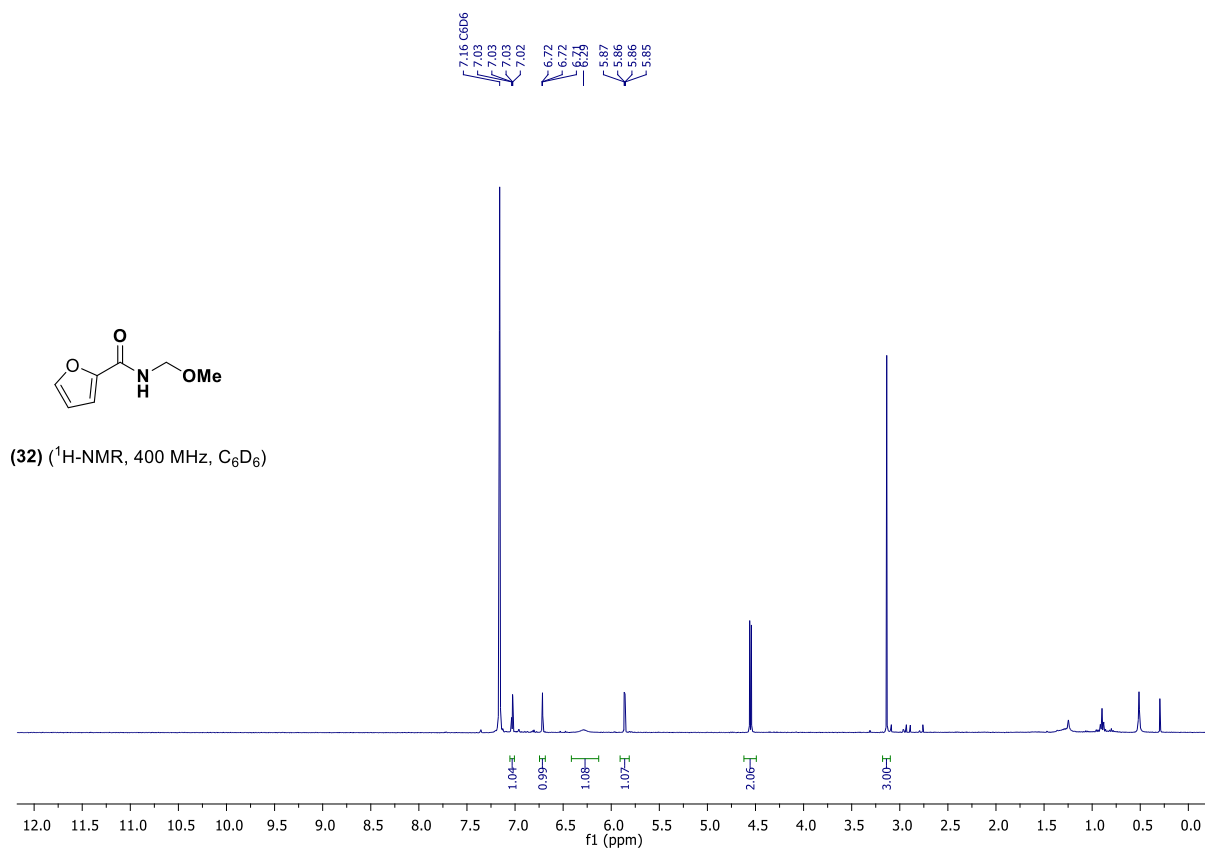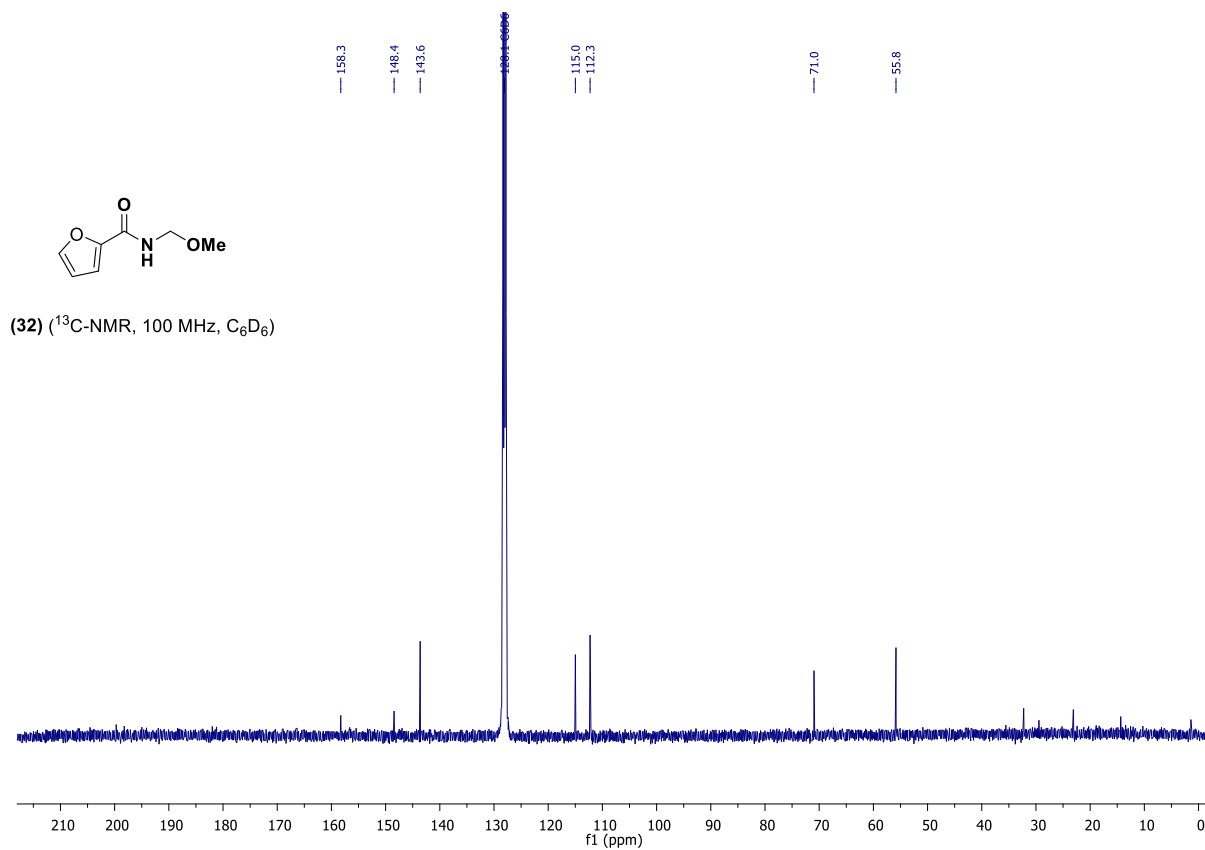

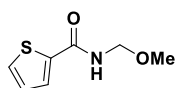

(33) ( $^1\text{H}$ -NMR, 400 MHz, Acetone- $\text{d}_6$ )

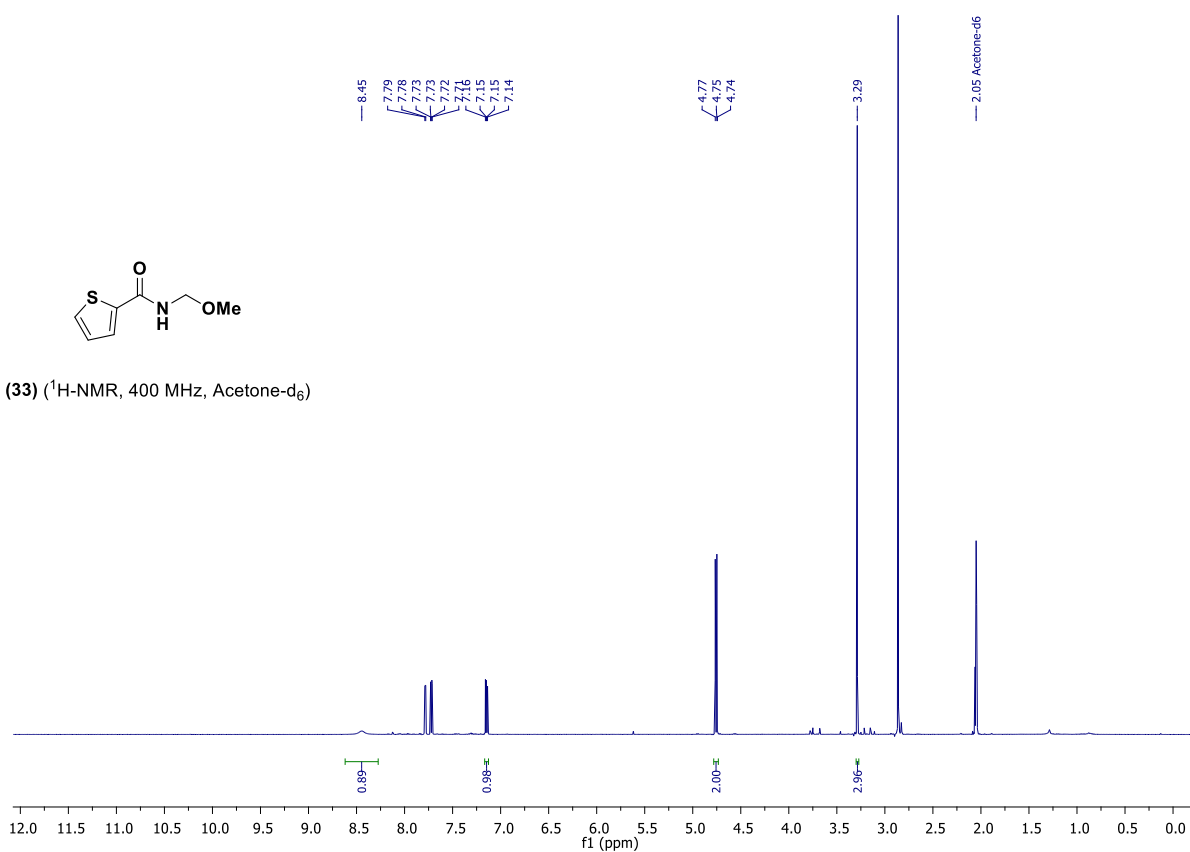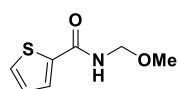

(33) ( $^{13}\text{C}$ -NMR, 100 MHz, Acetone- $\text{d}_6$ )

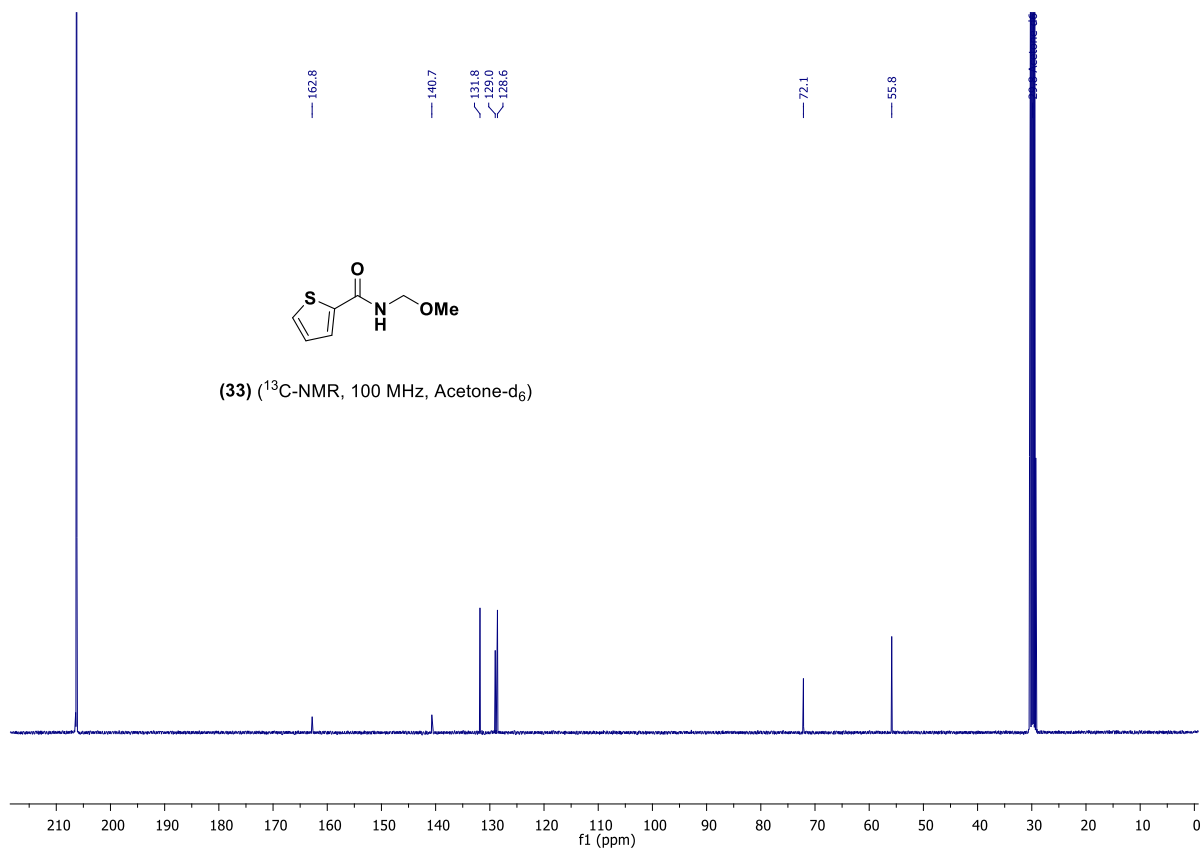

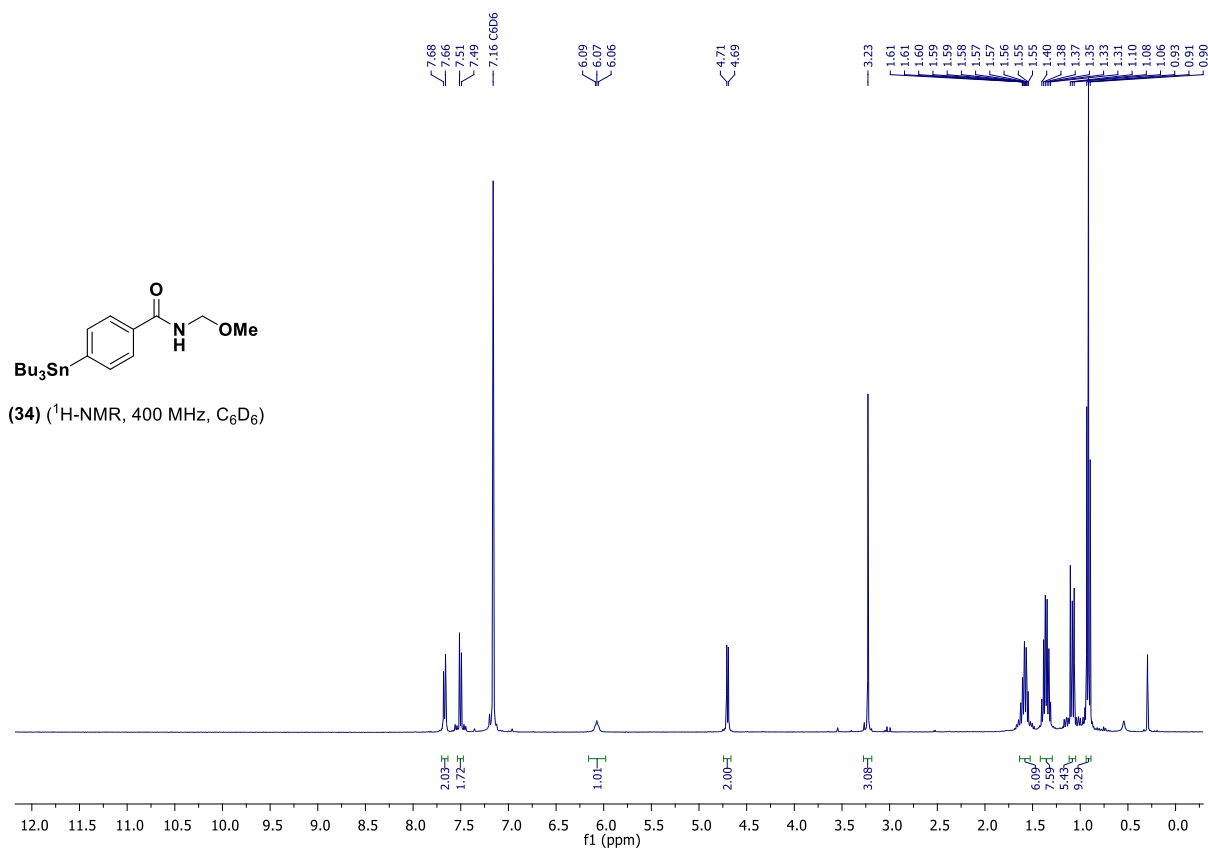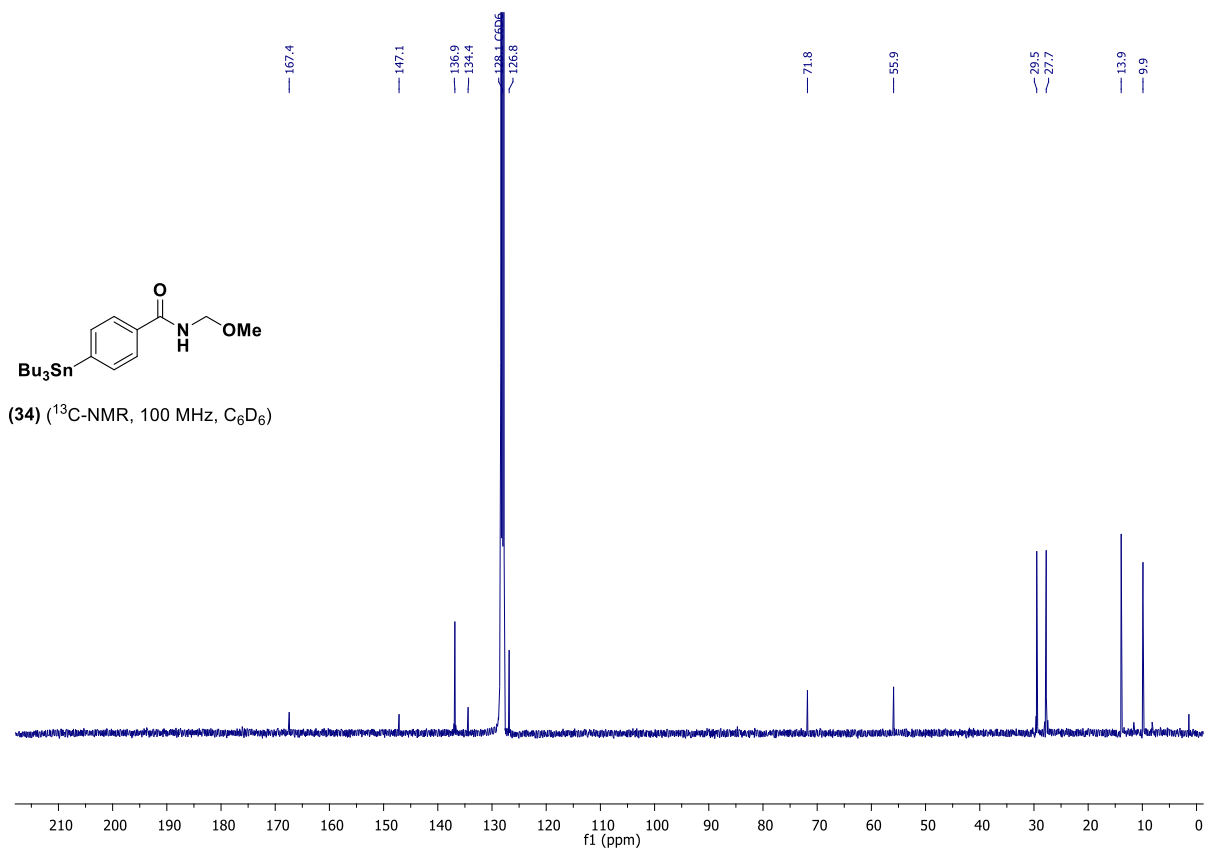

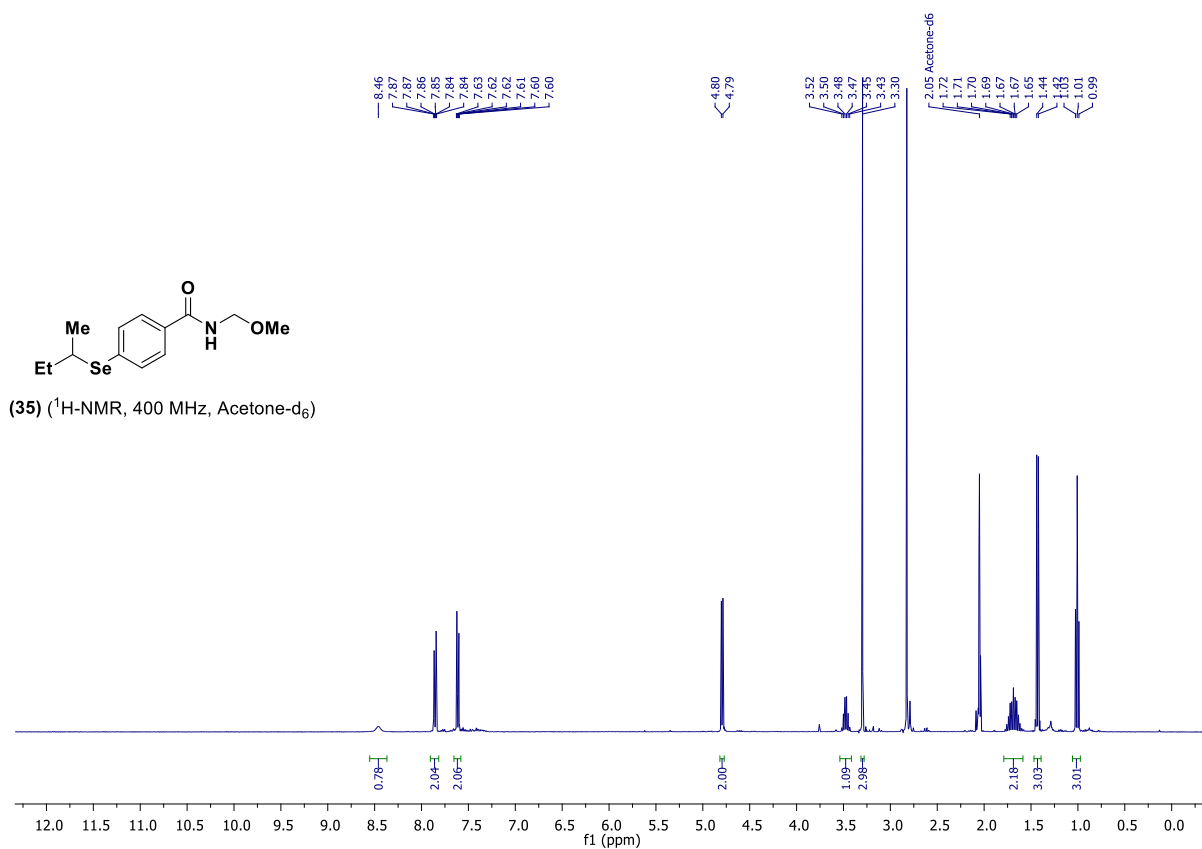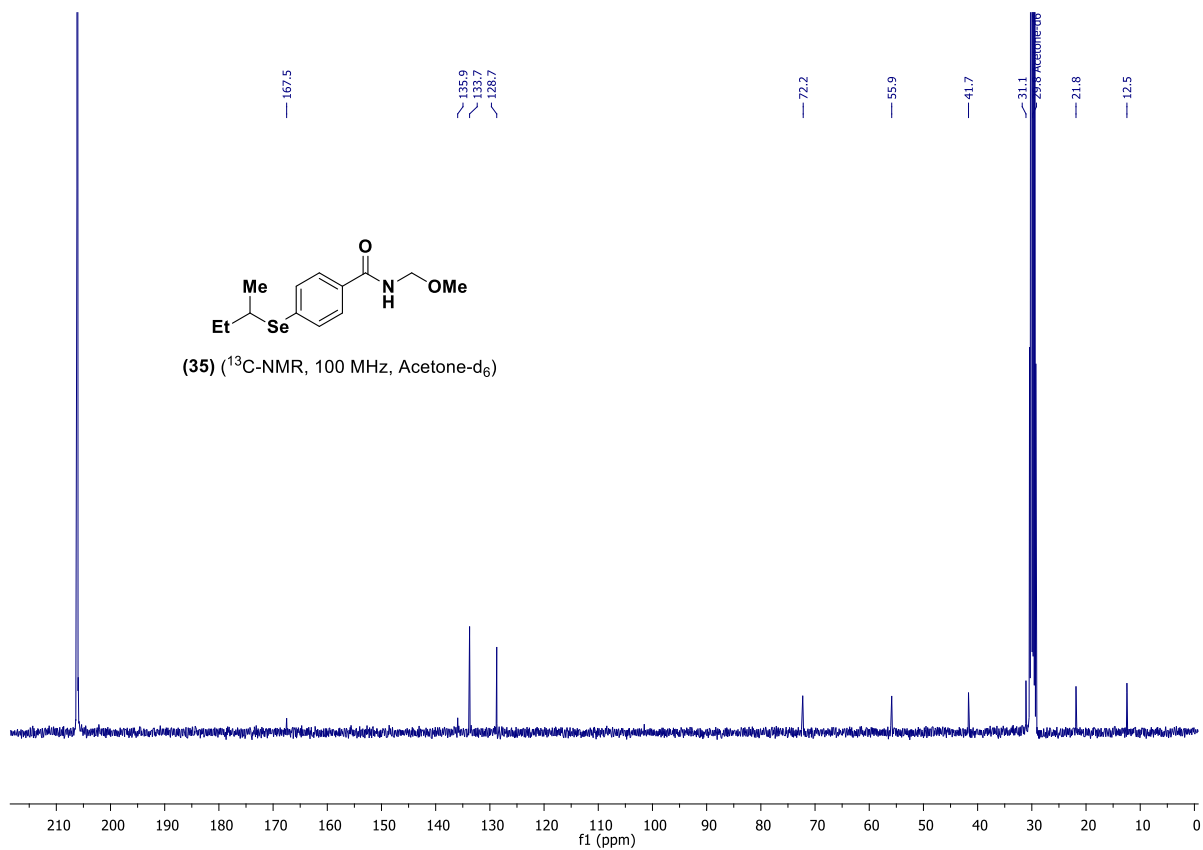

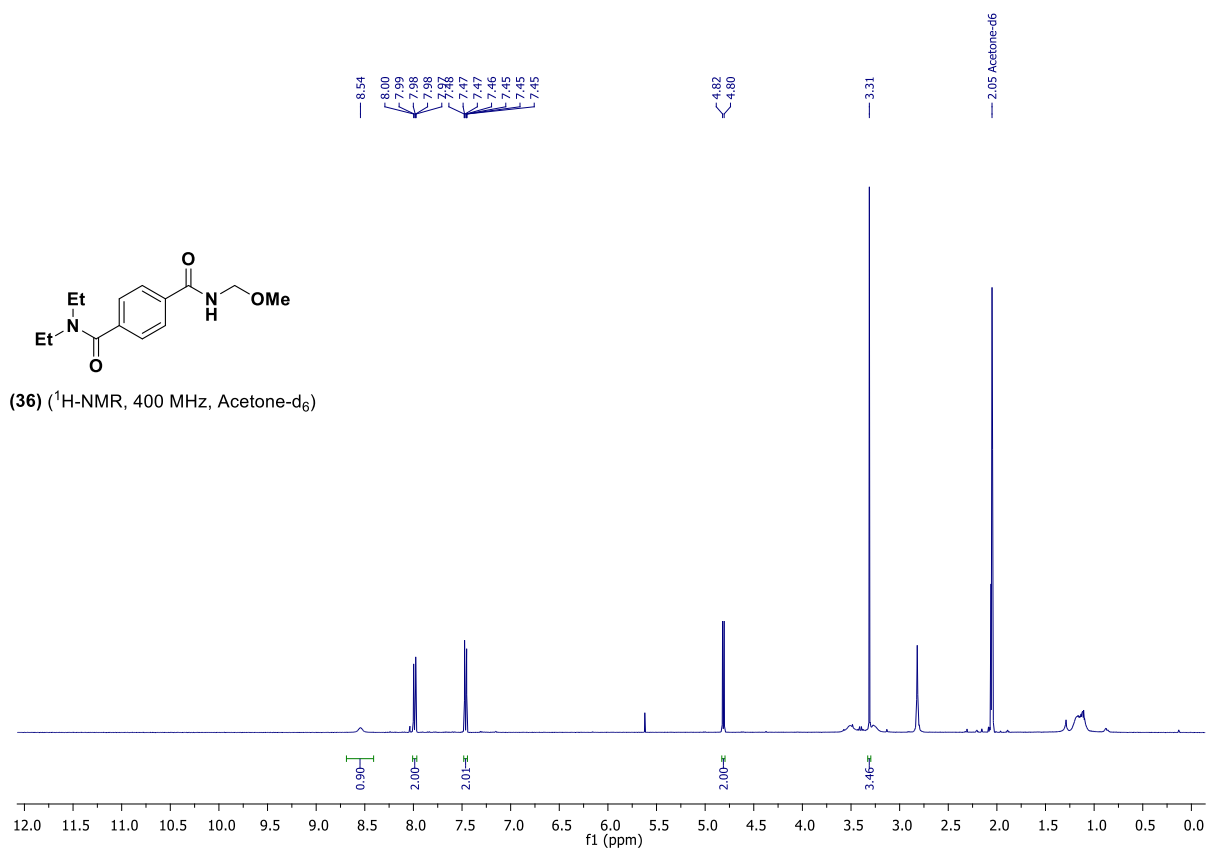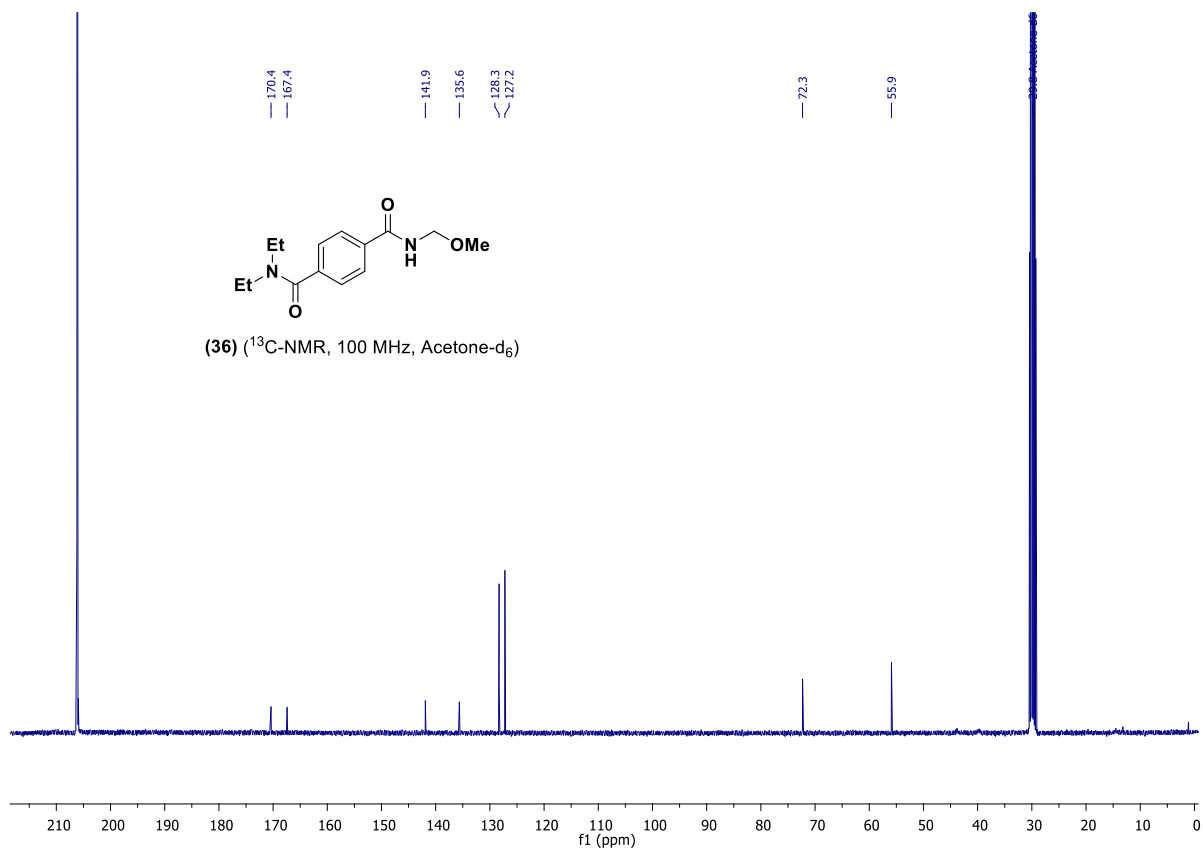

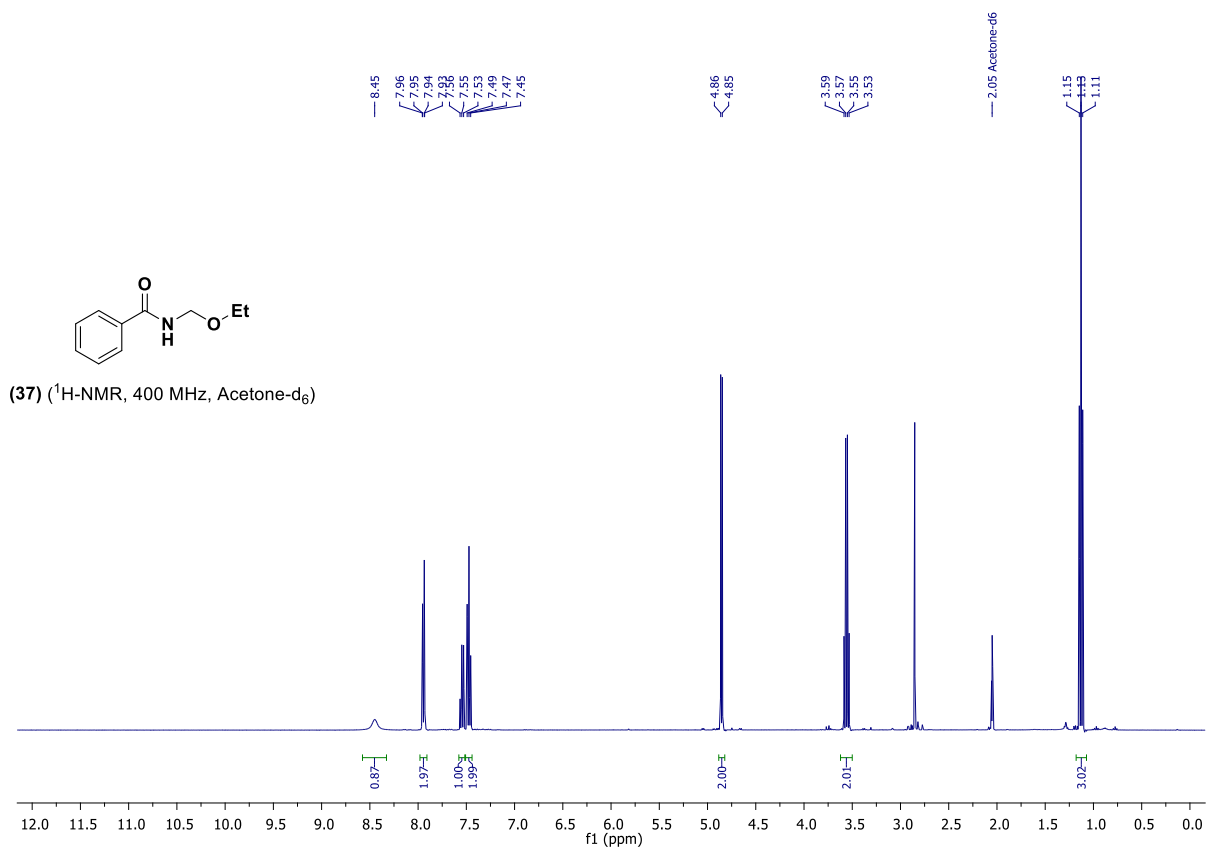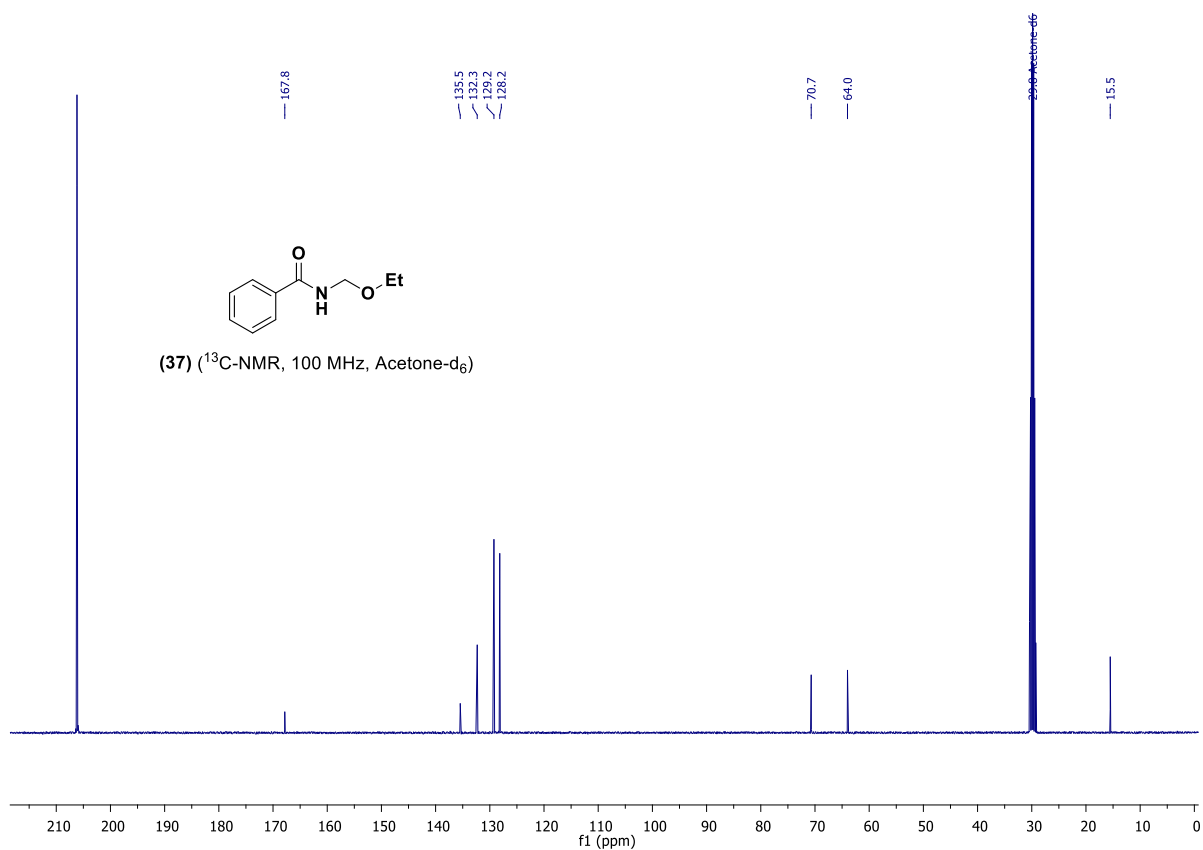

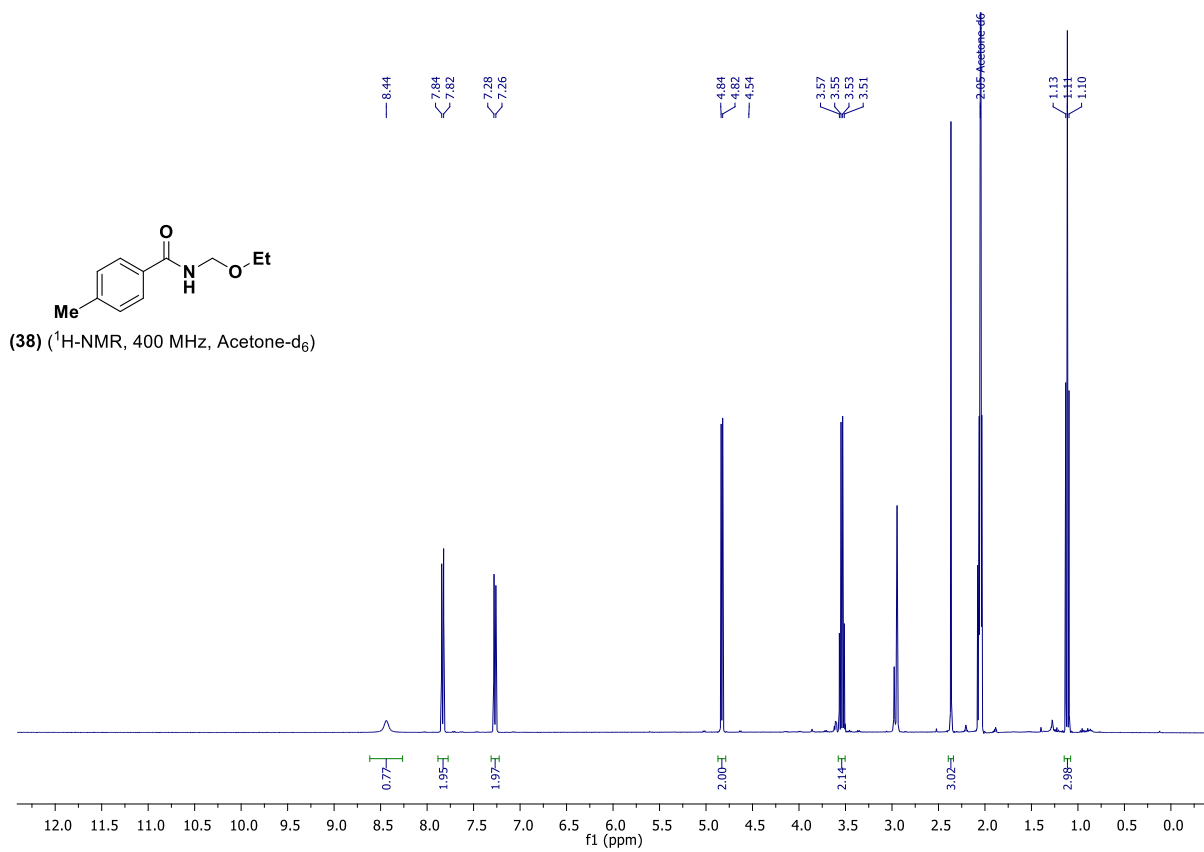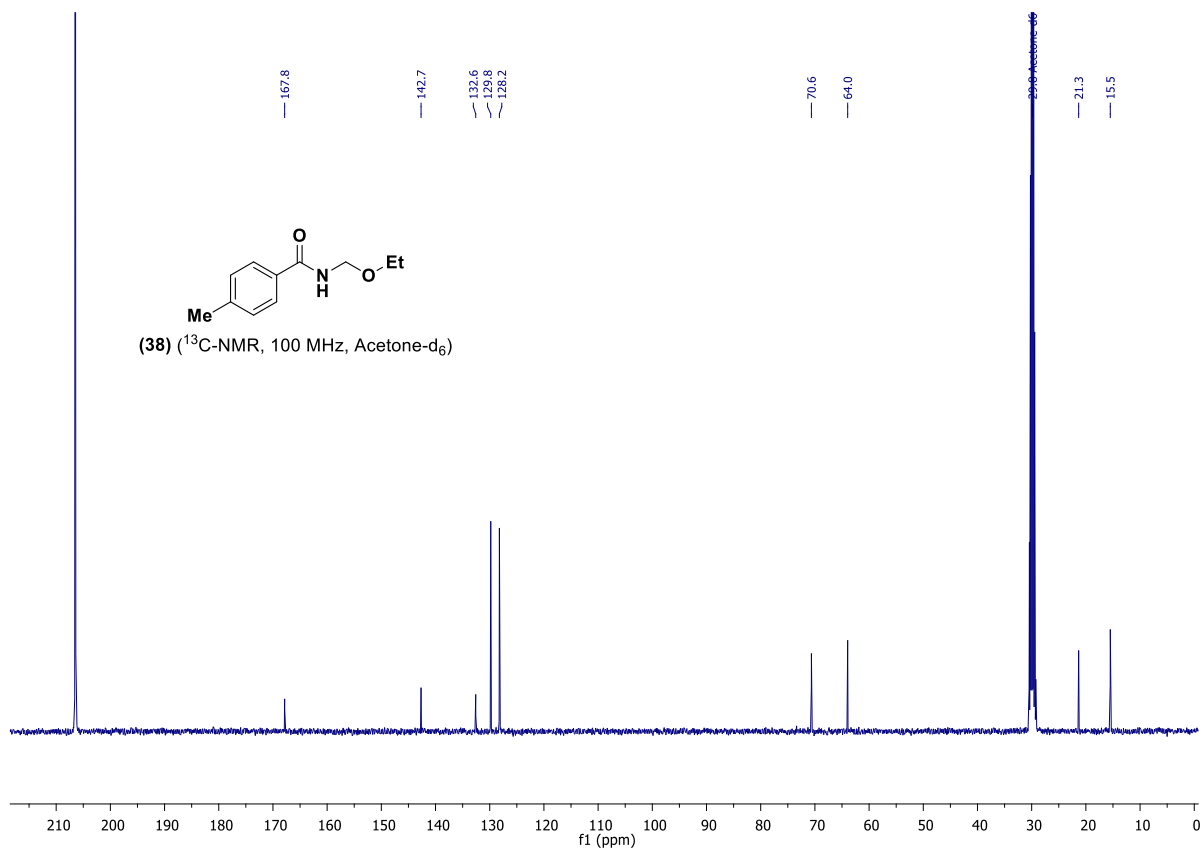

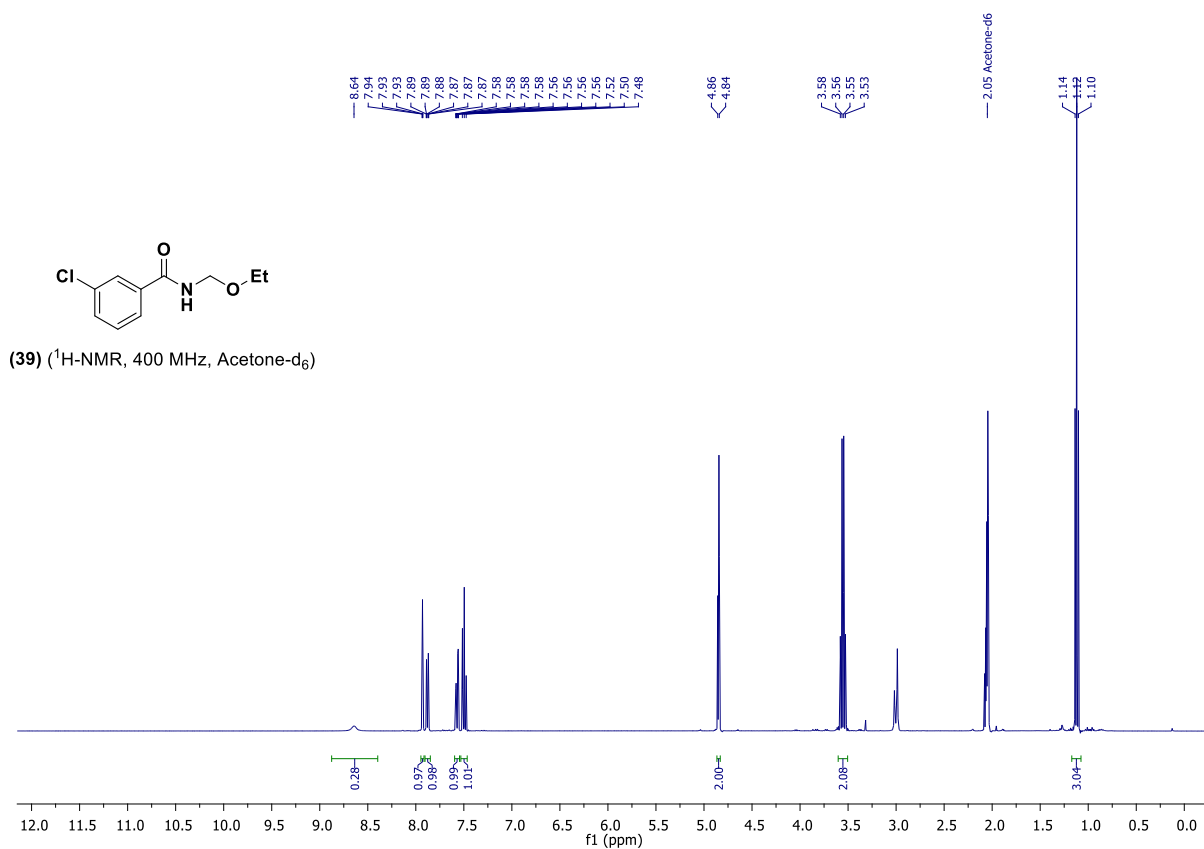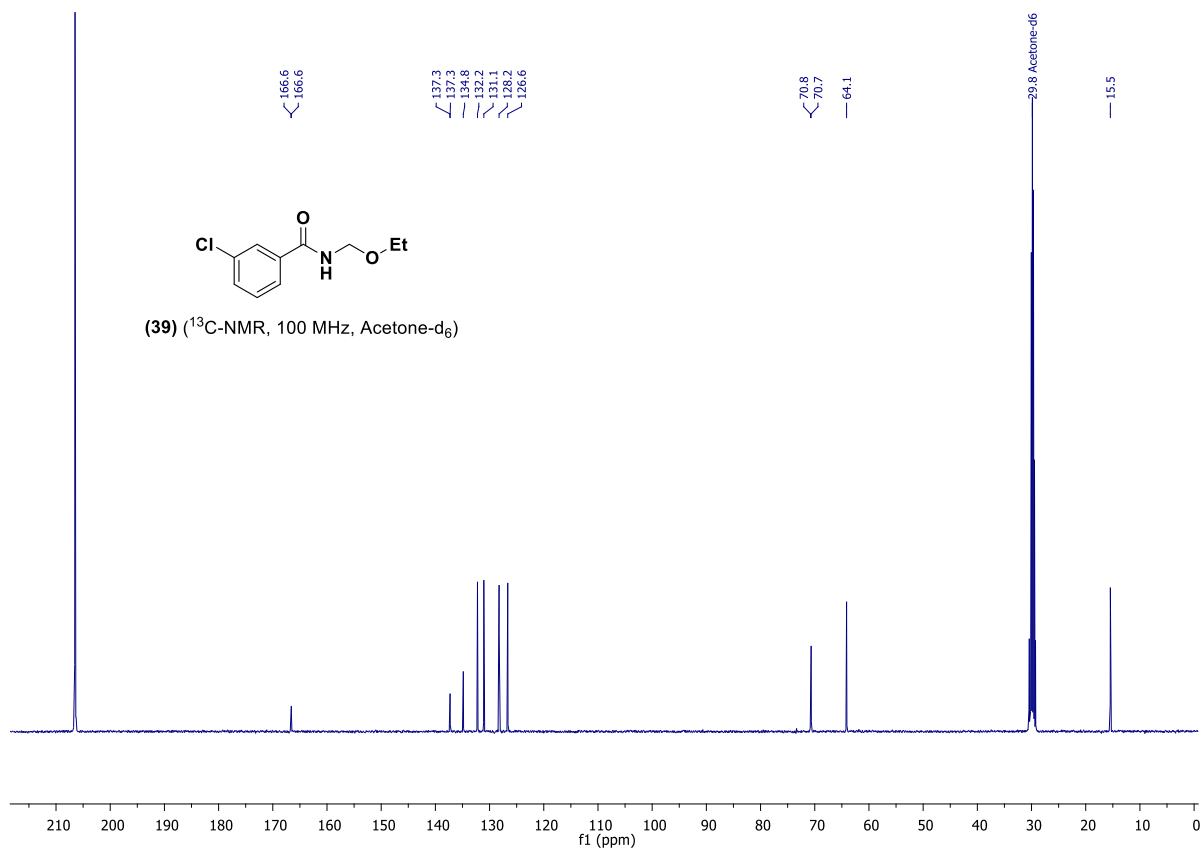

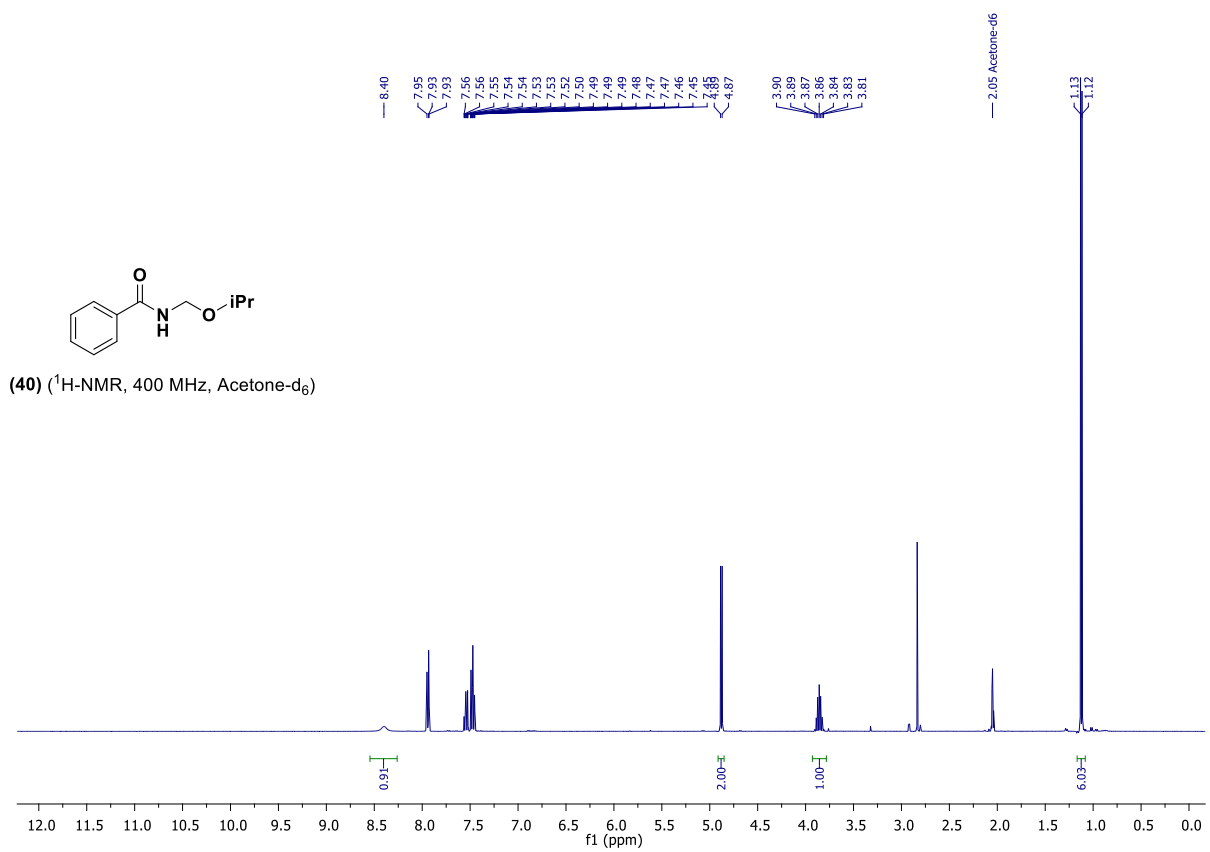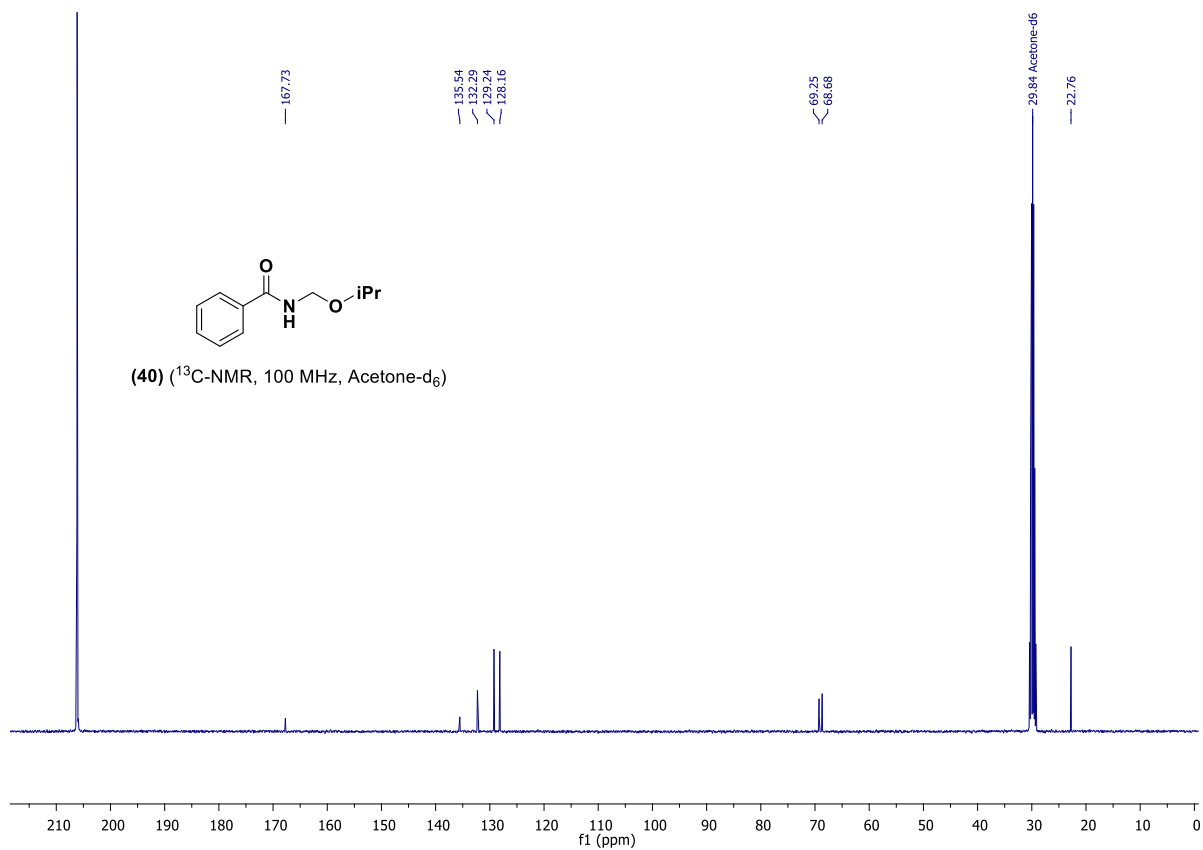

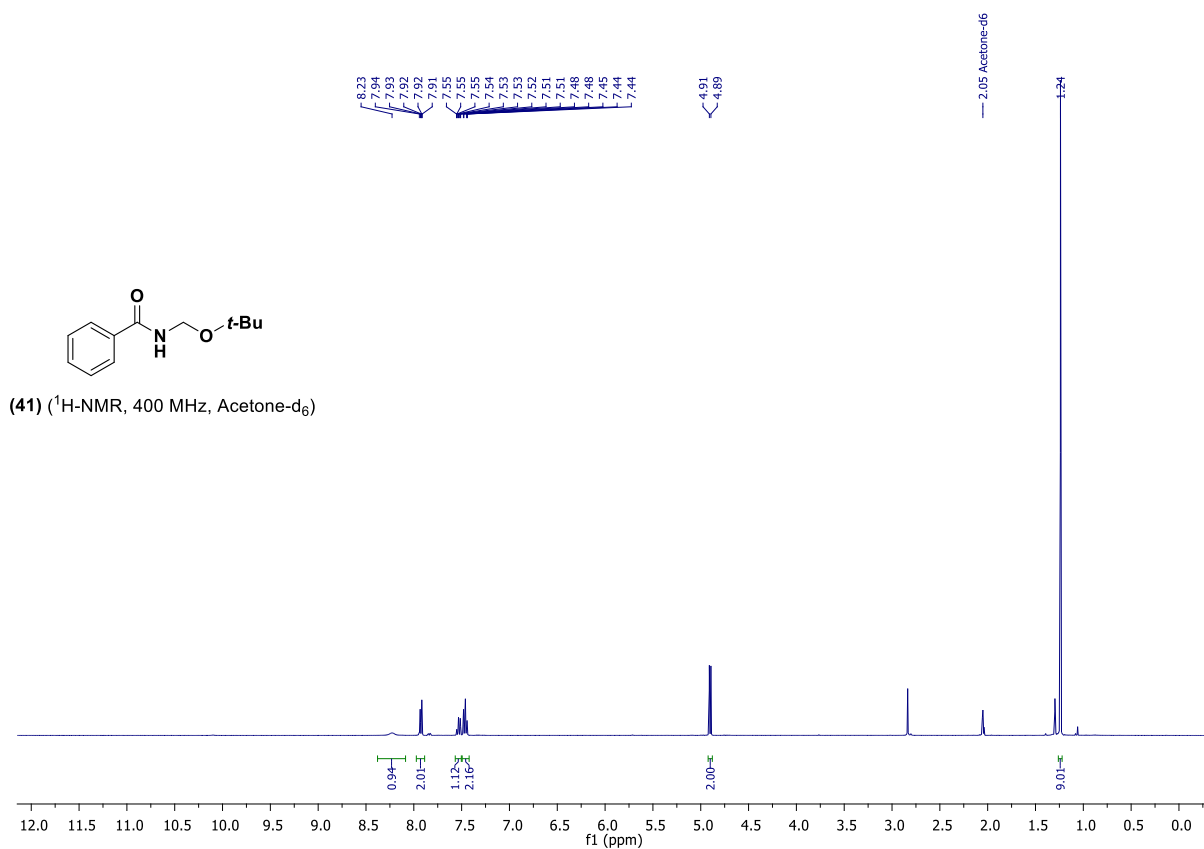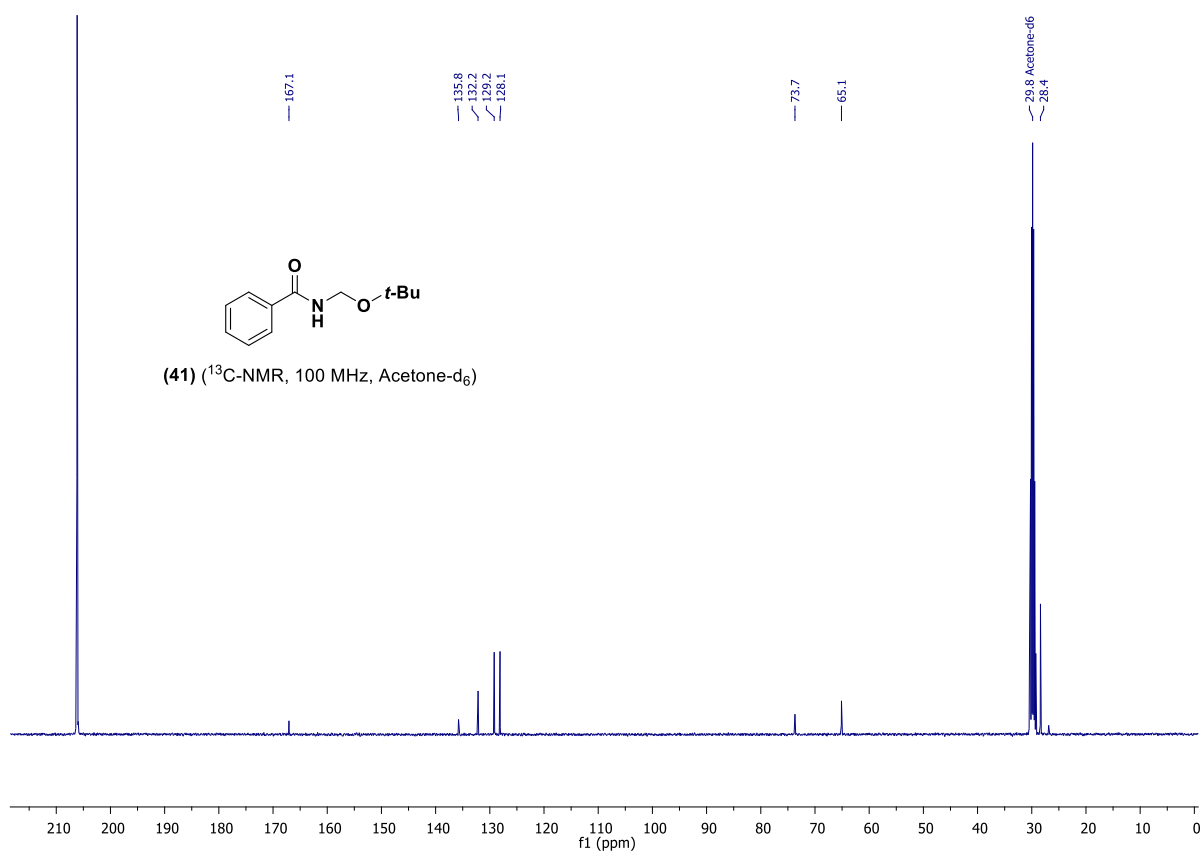

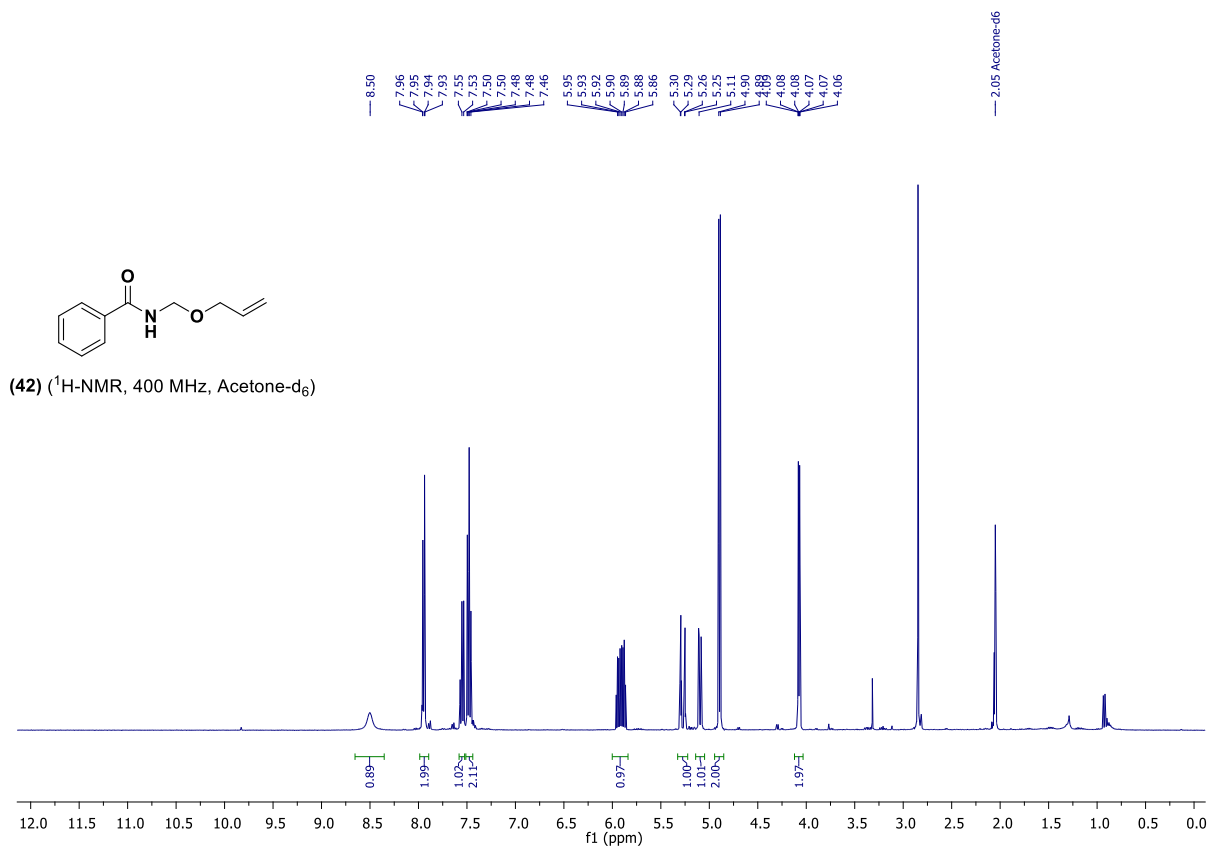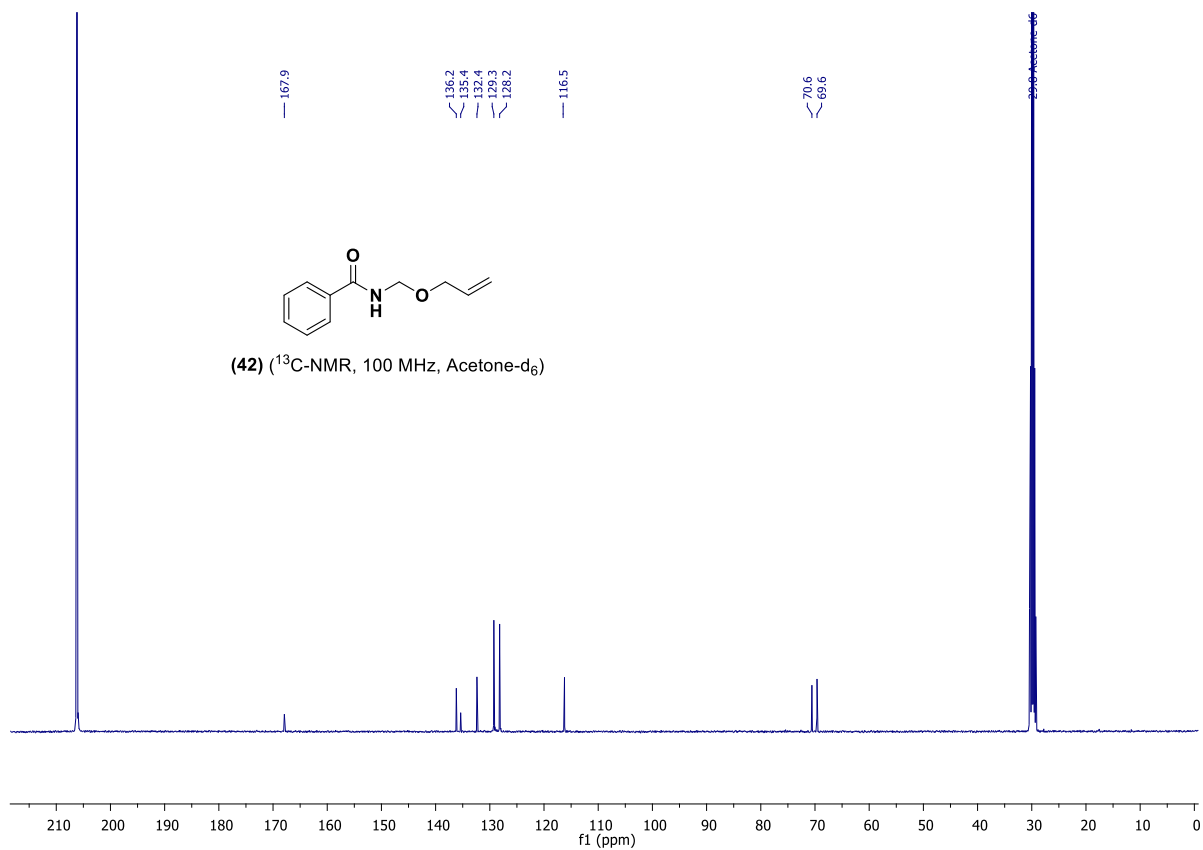

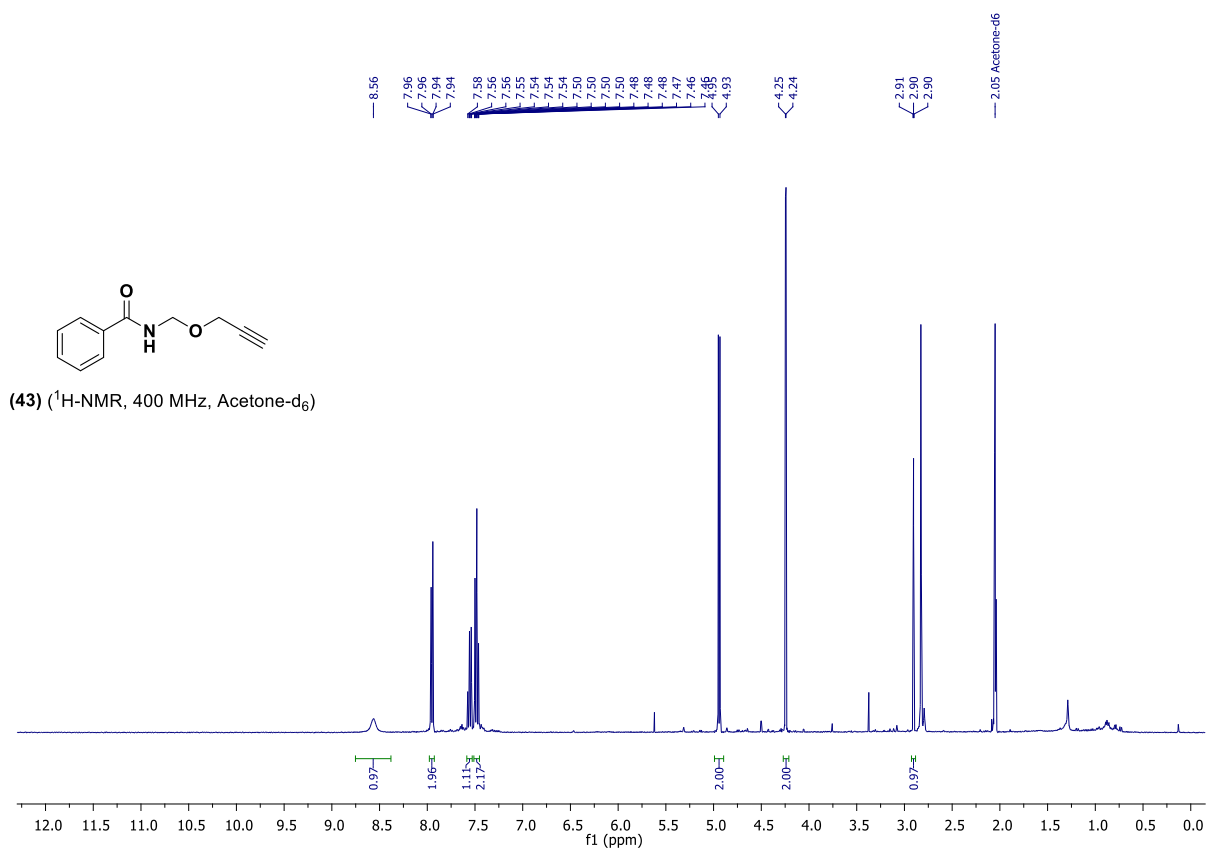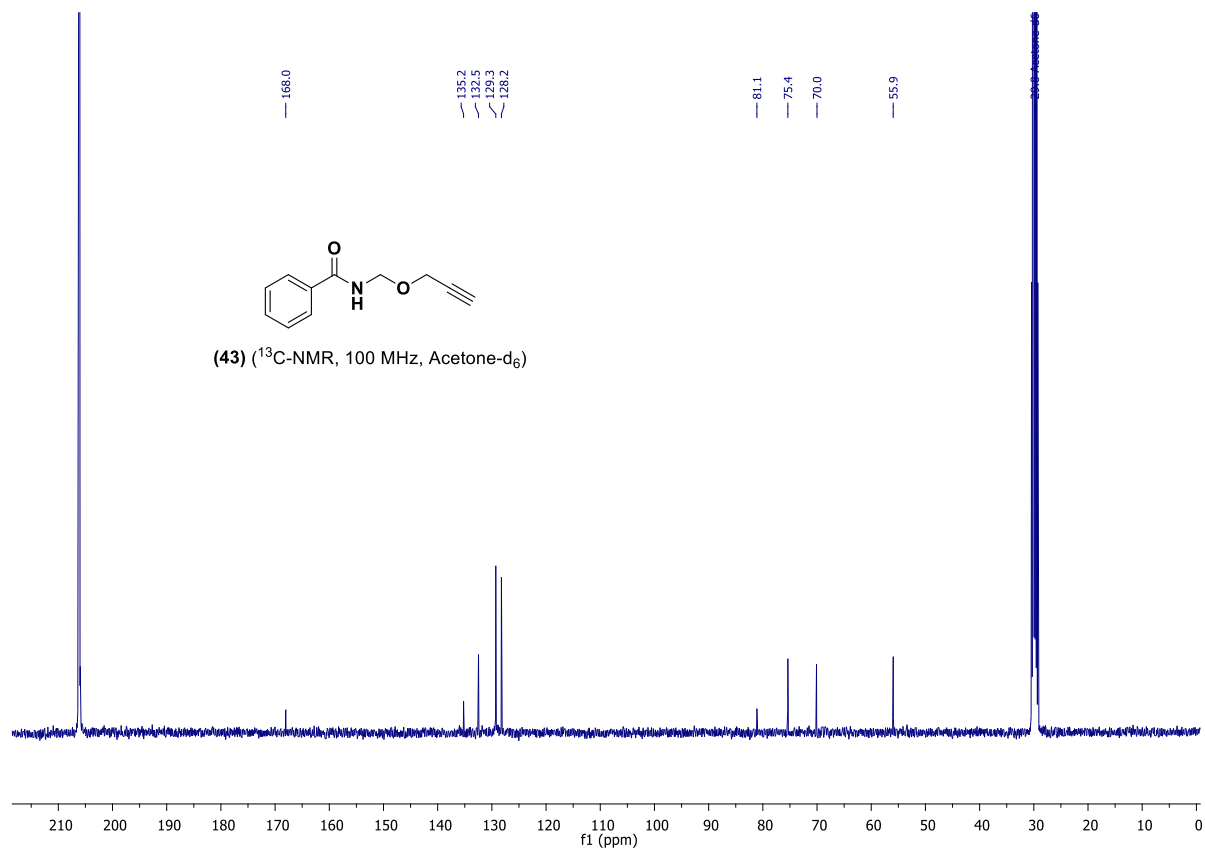

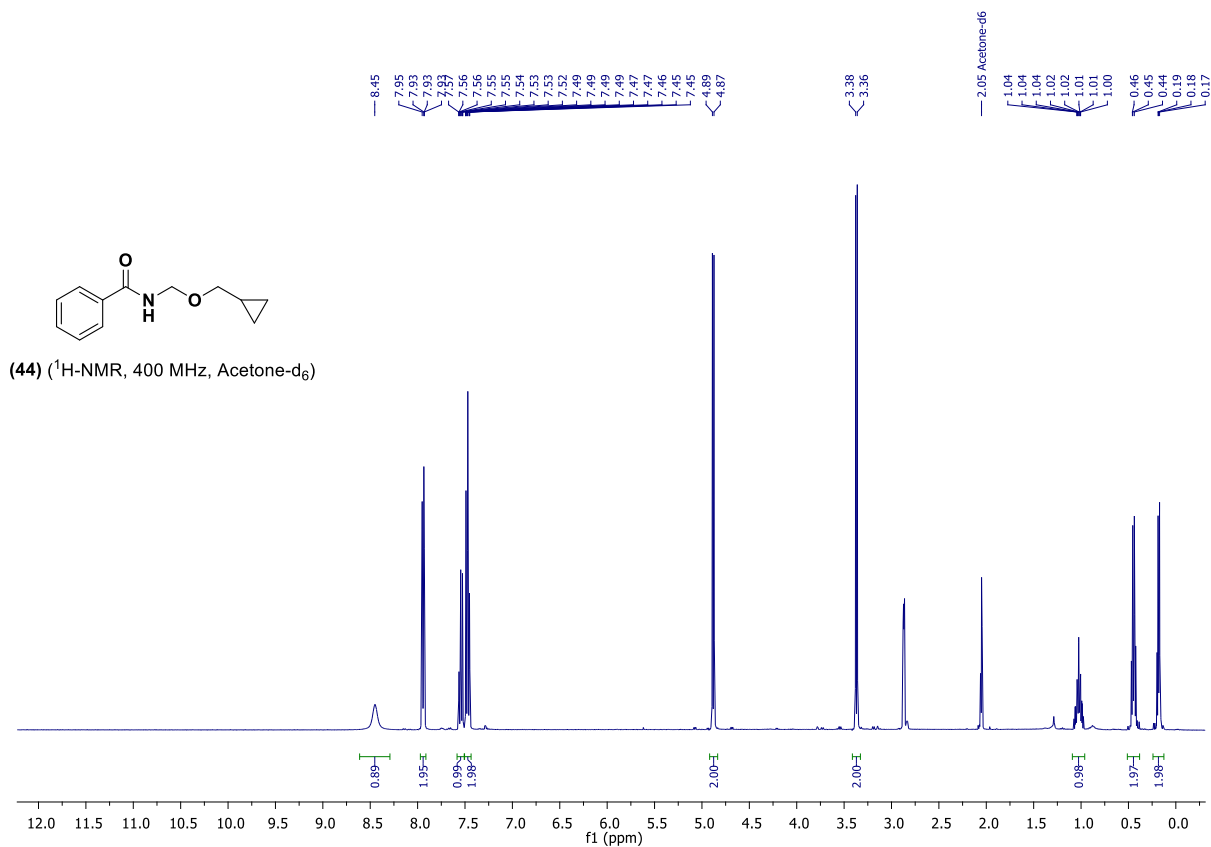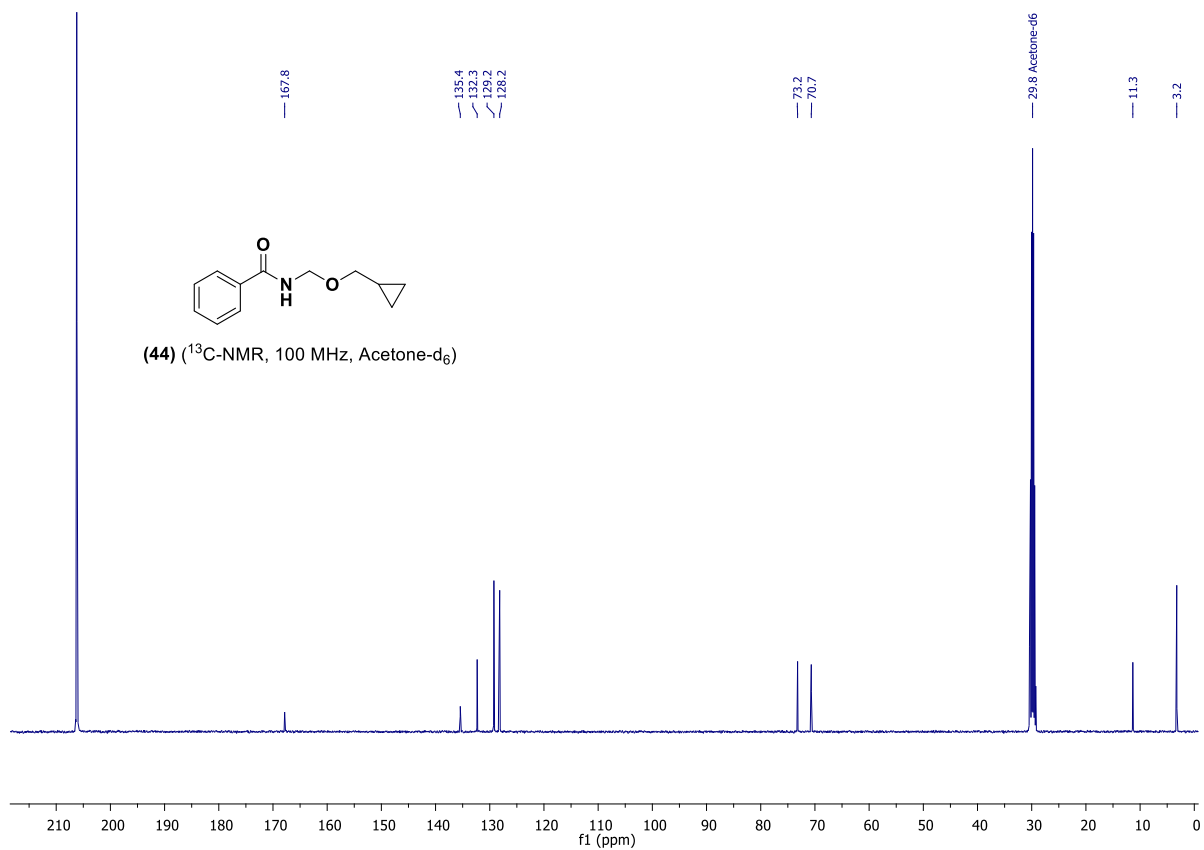

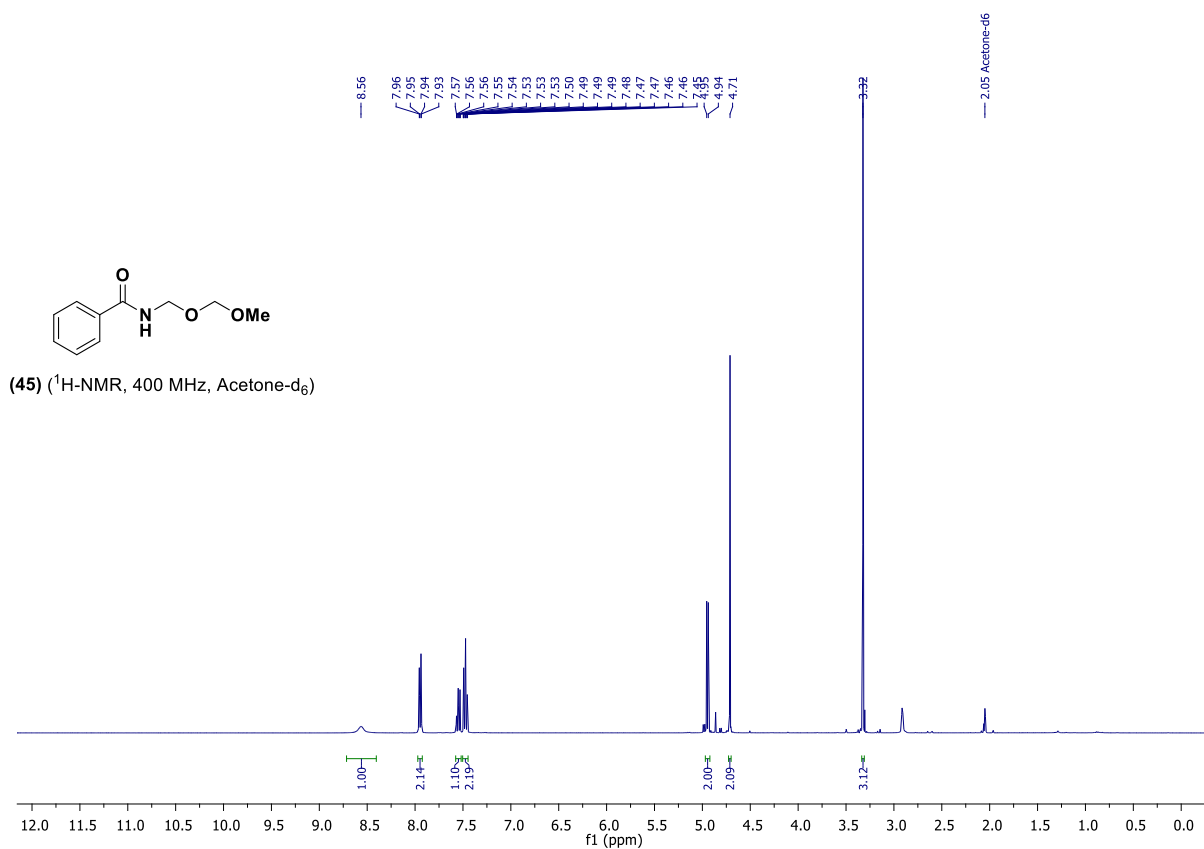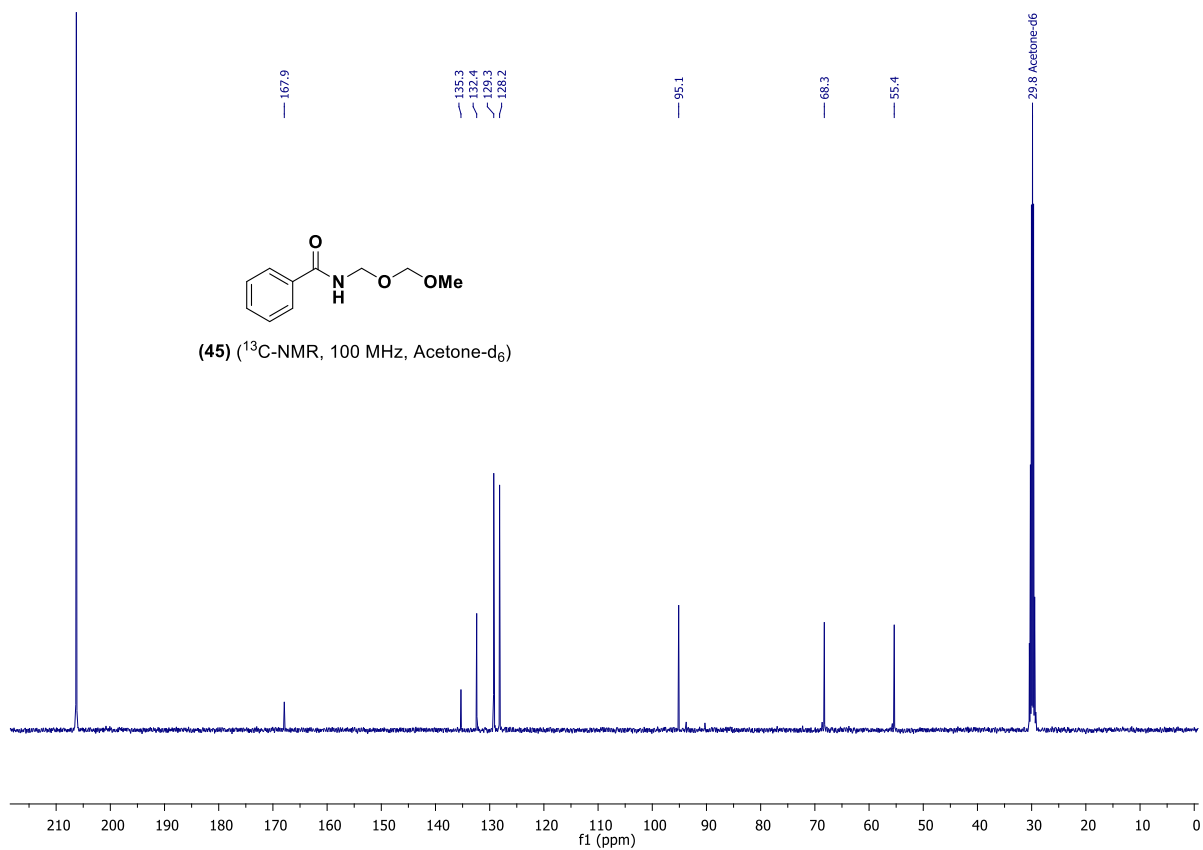

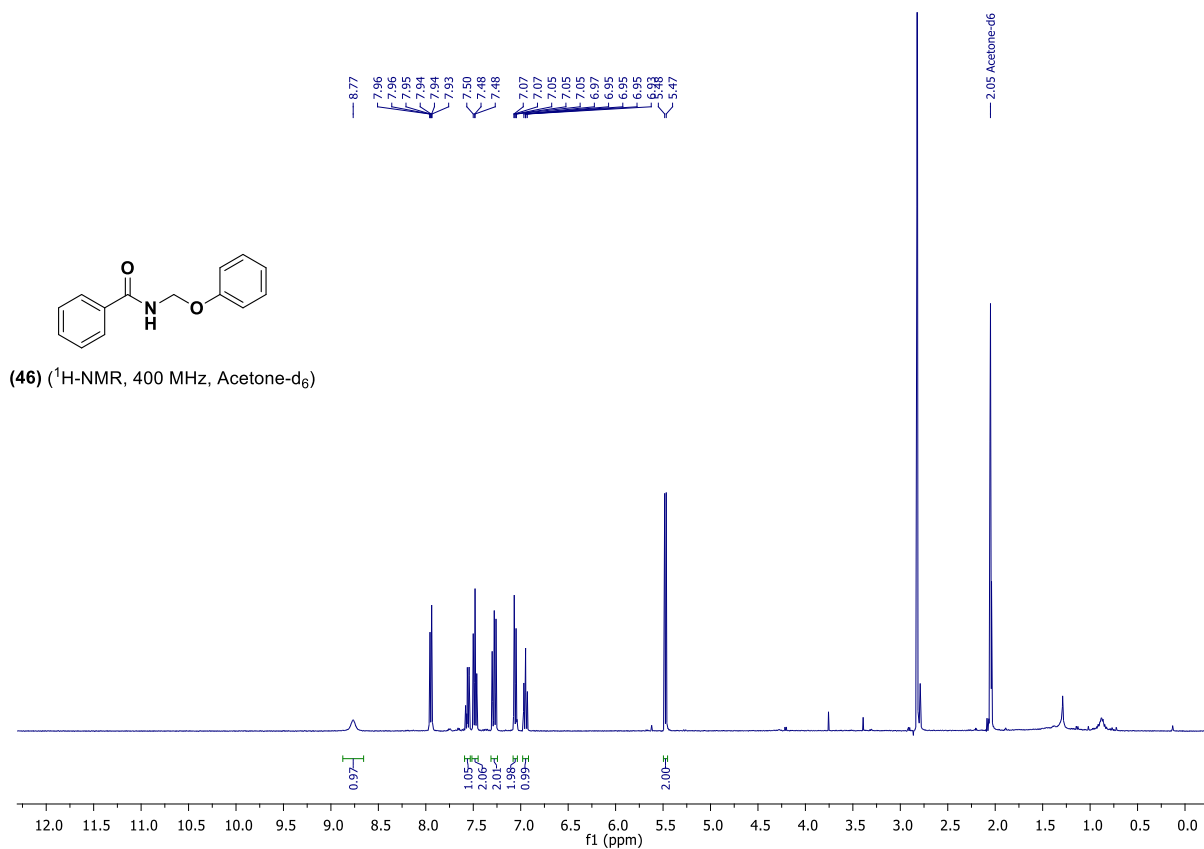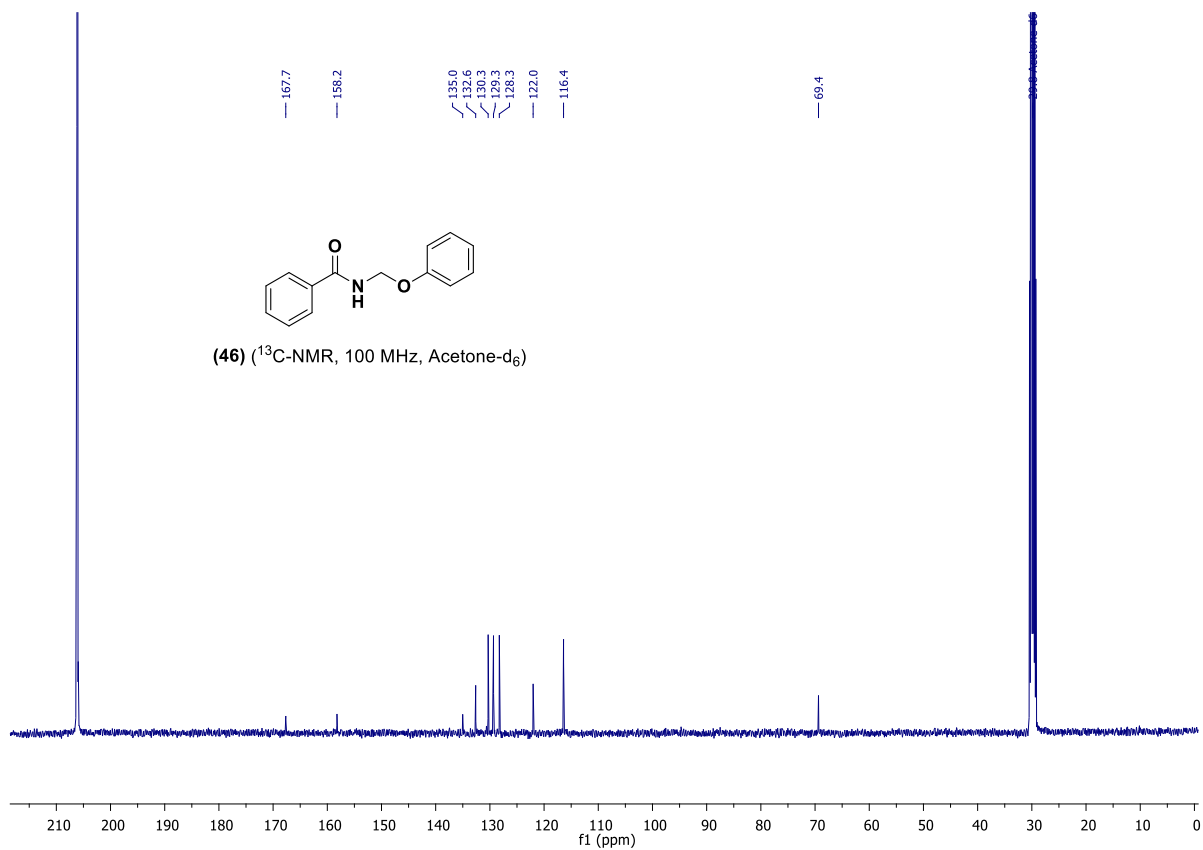

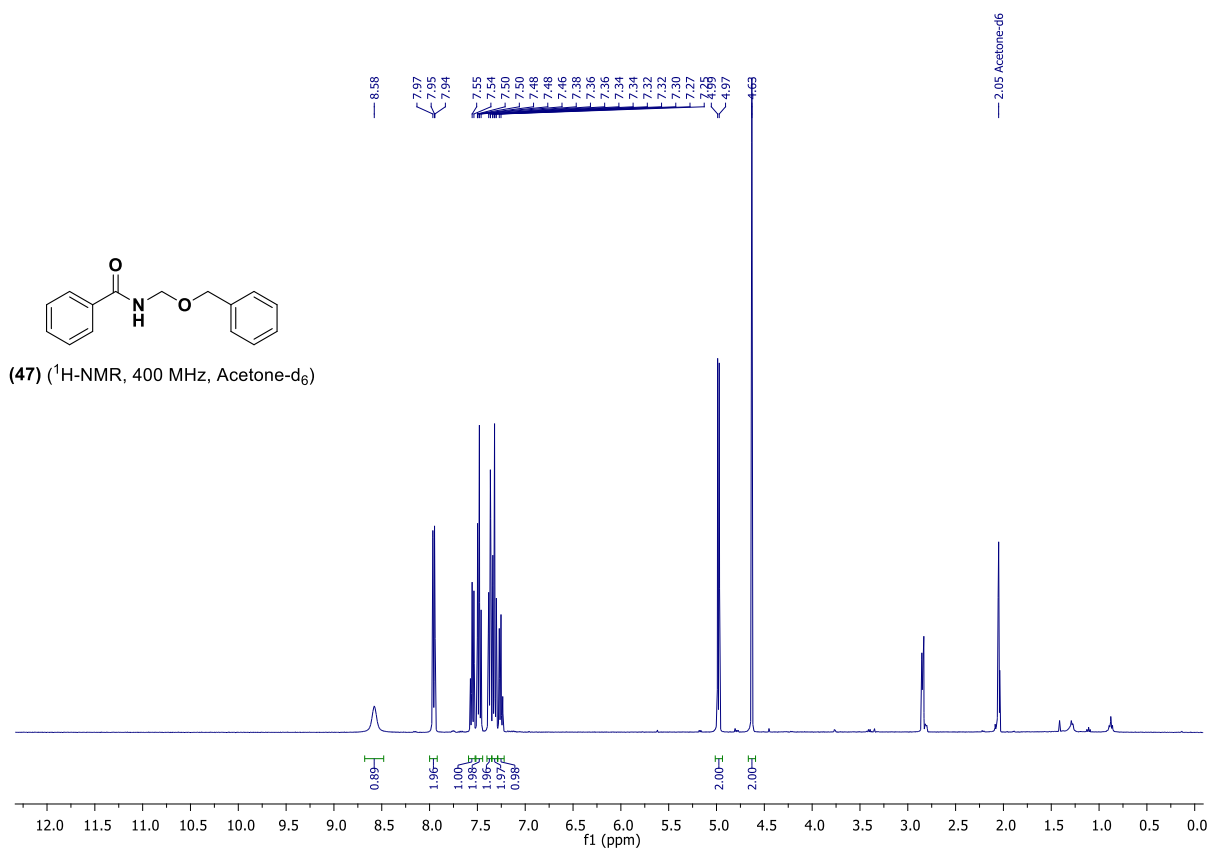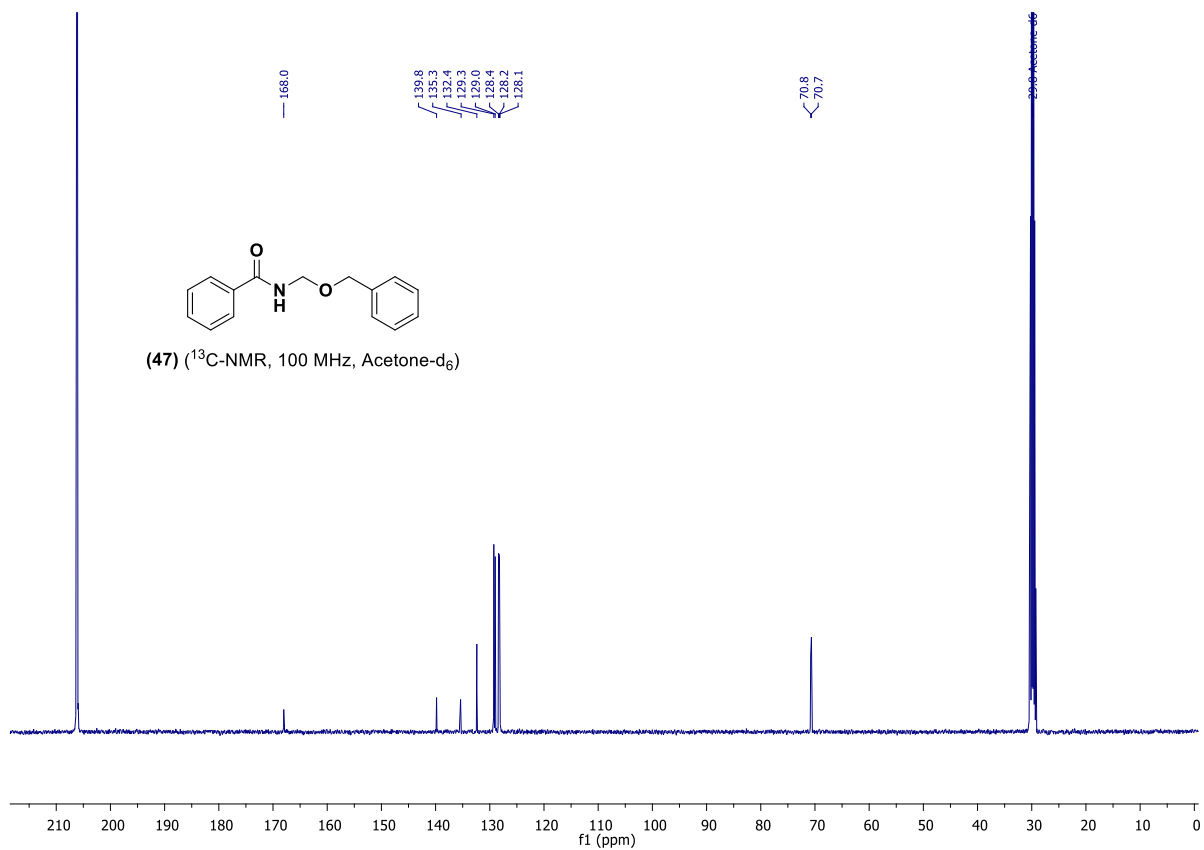

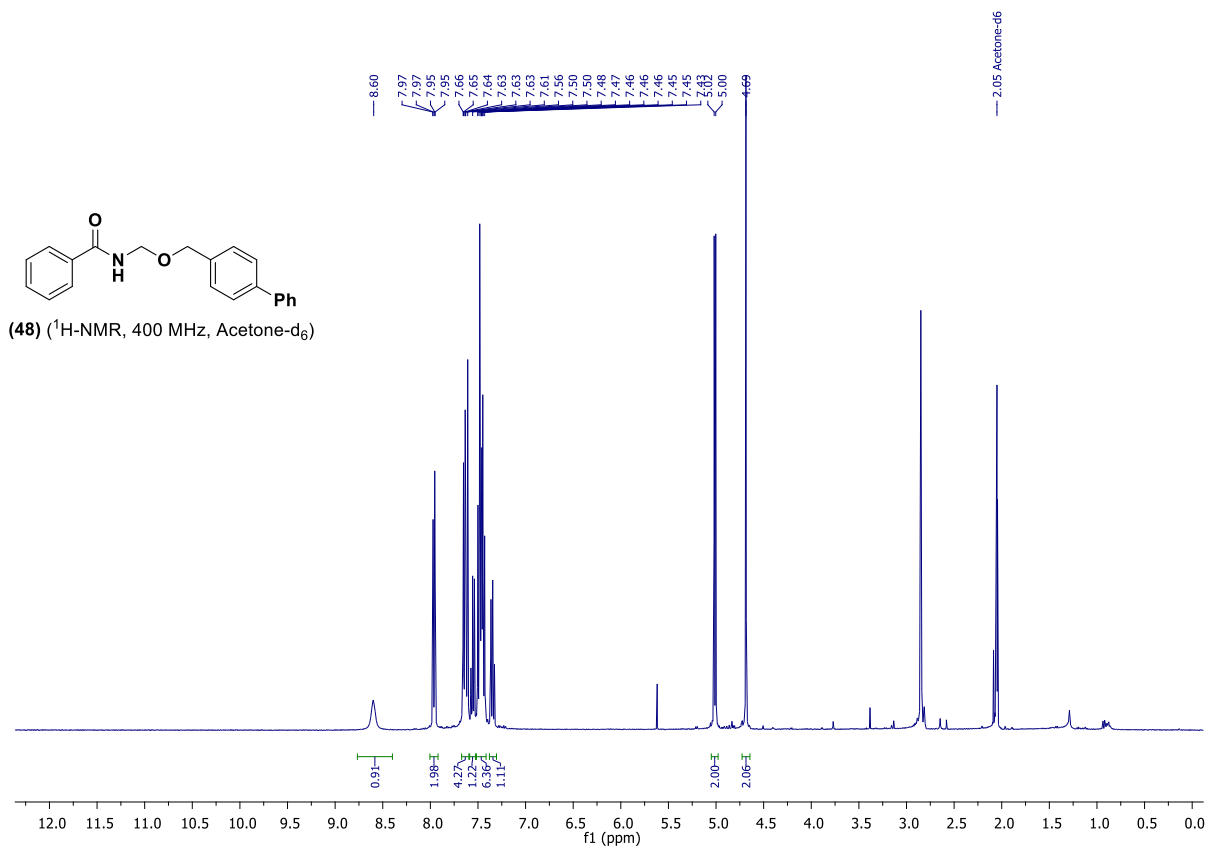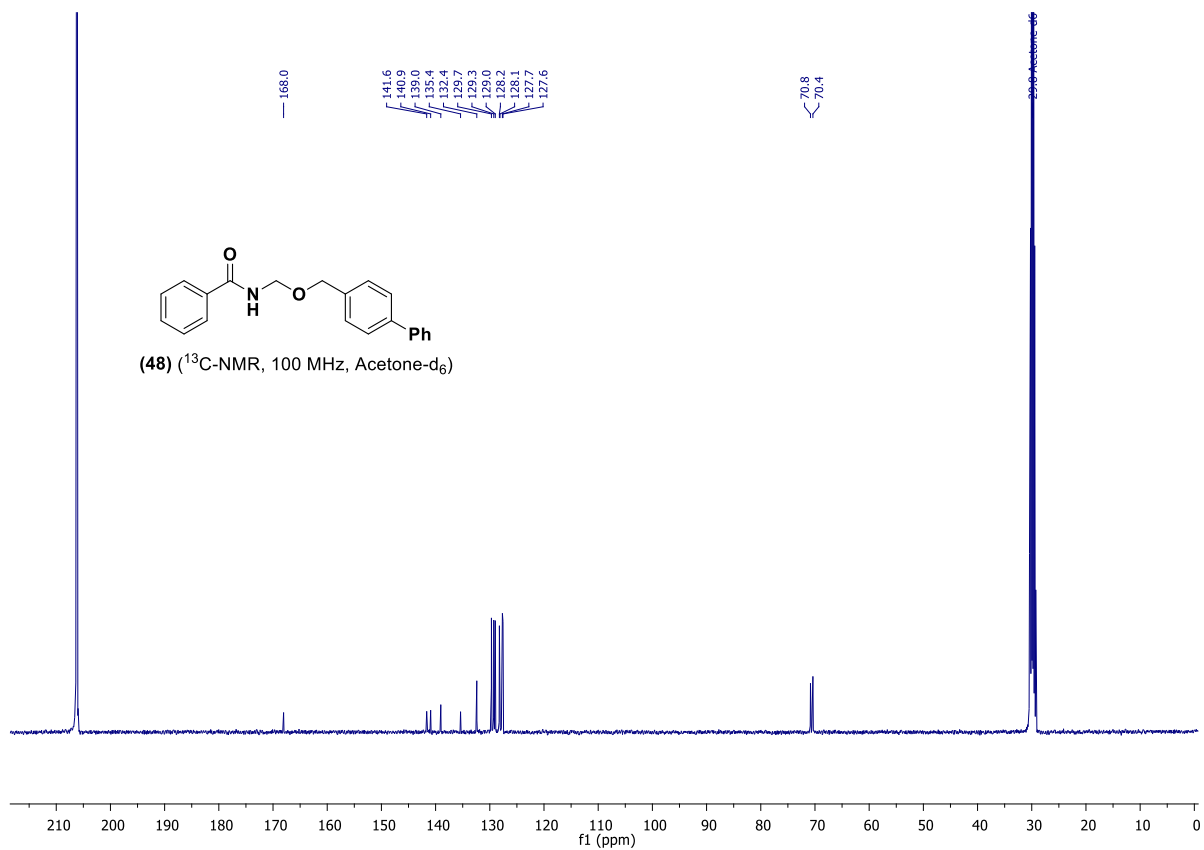

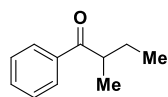

(50) ( $^1\text{H}$ -NMR, 200 MHz,  $\text{CDCl}_3$ )

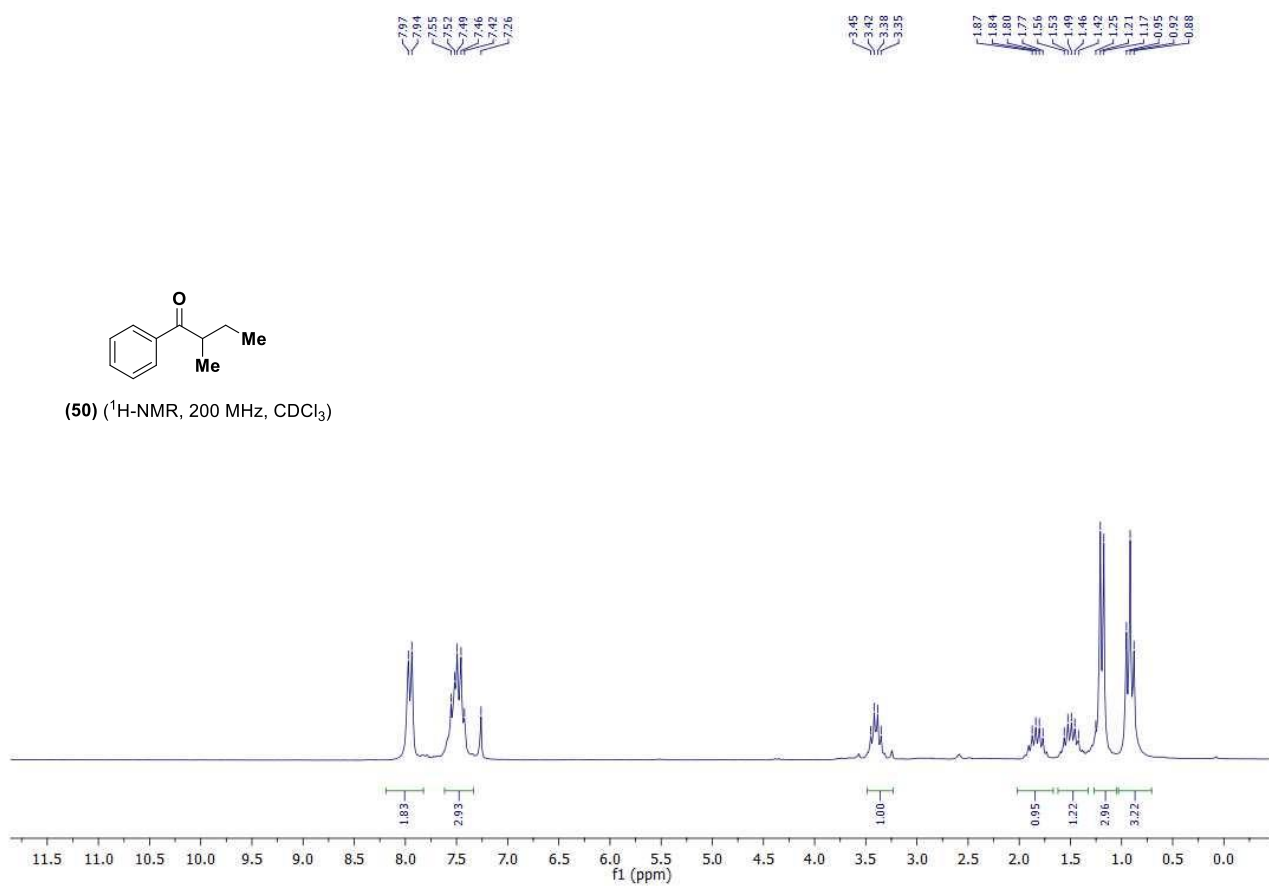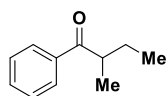

(50) ( $^{13}\text{C}$ -NMR, 50 MHz,  $\text{CDCl}_3$ )

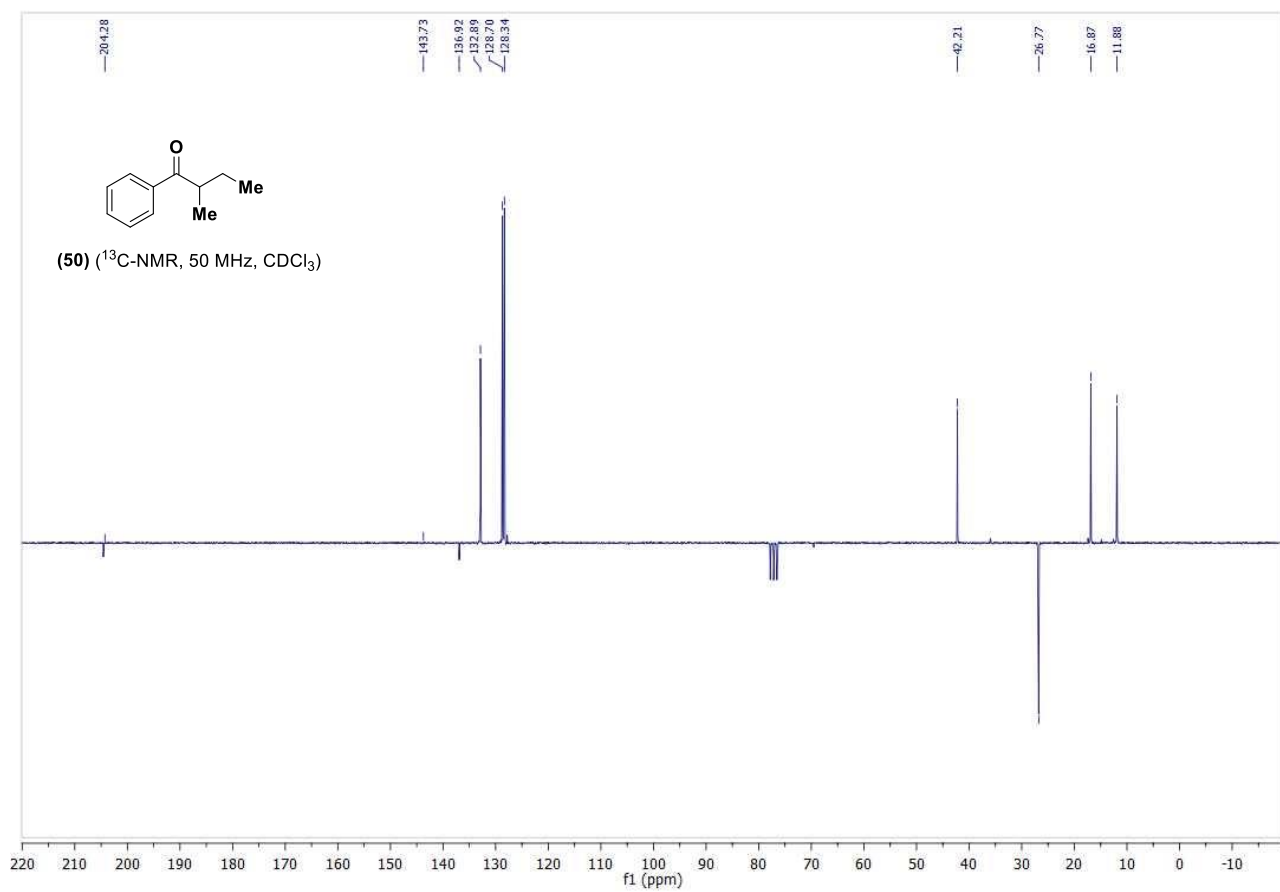

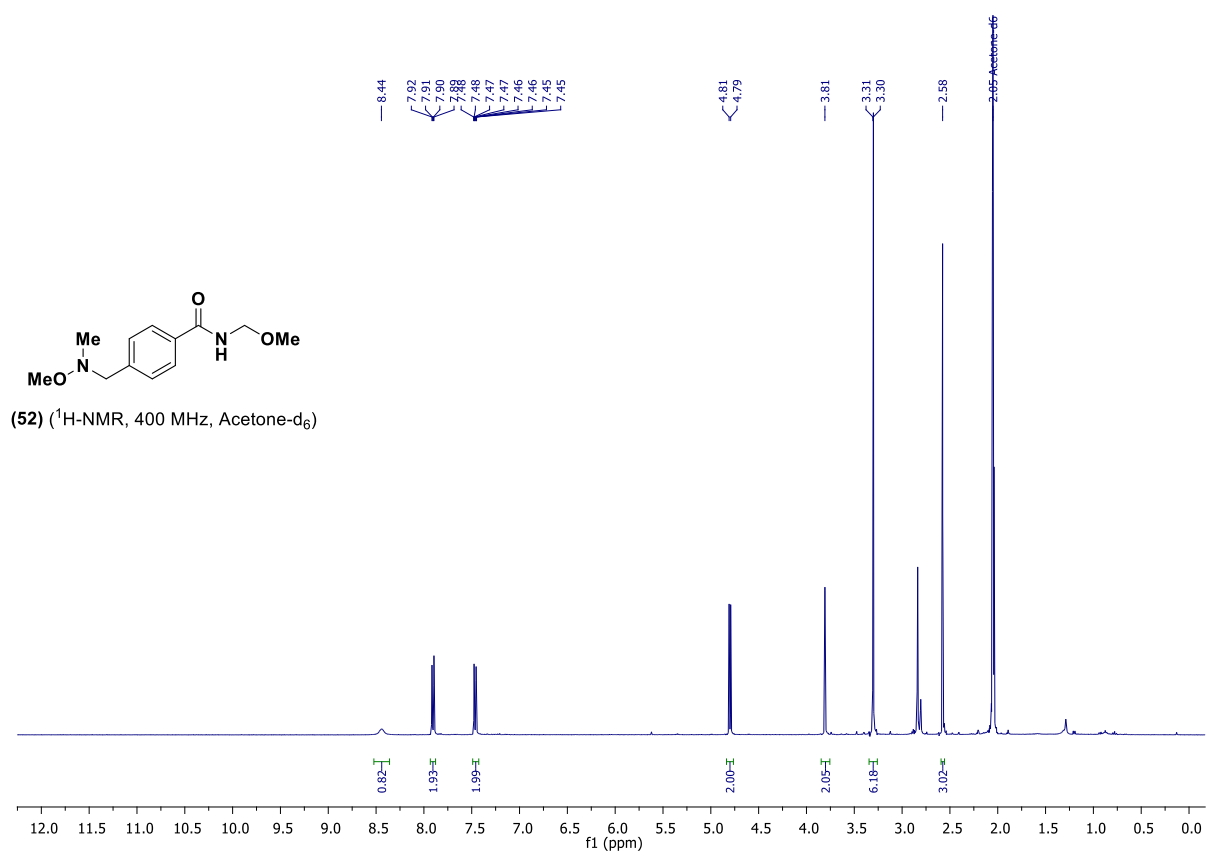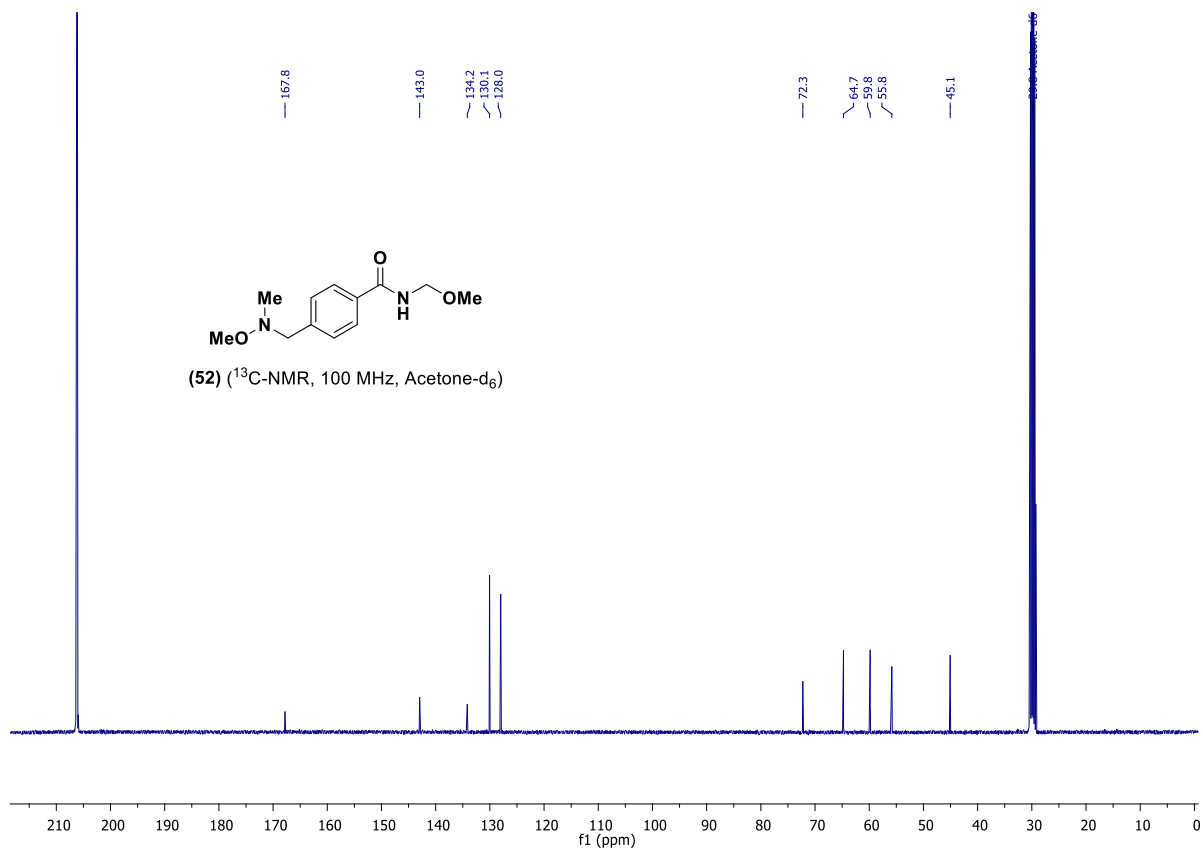

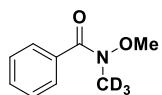

(53) ( $^1\text{H}$ -NMR, 400 MHz,  $\text{CDCl}_3$ )

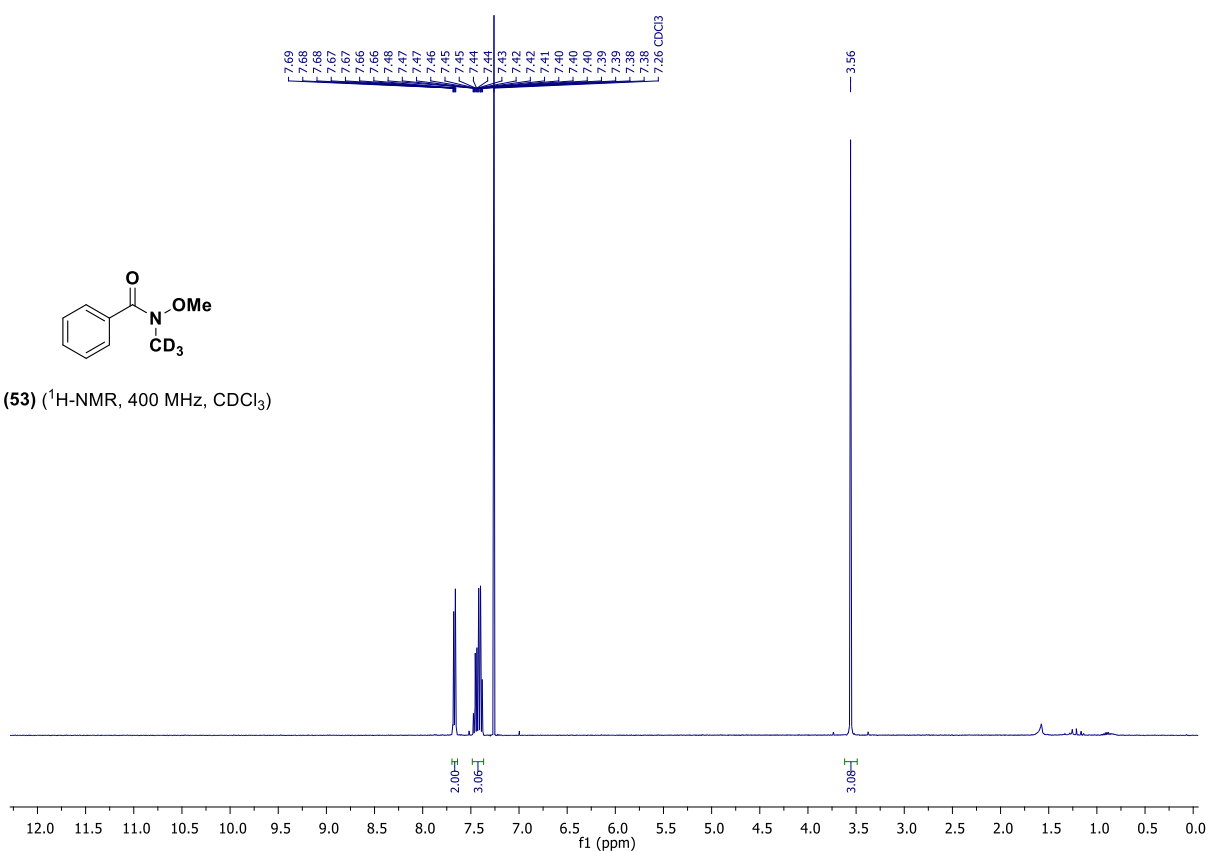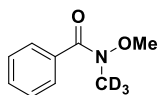

(53) ( $^{13}\text{C}$ -NMR, 100 MHz,  $\text{CDCl}_3$ )

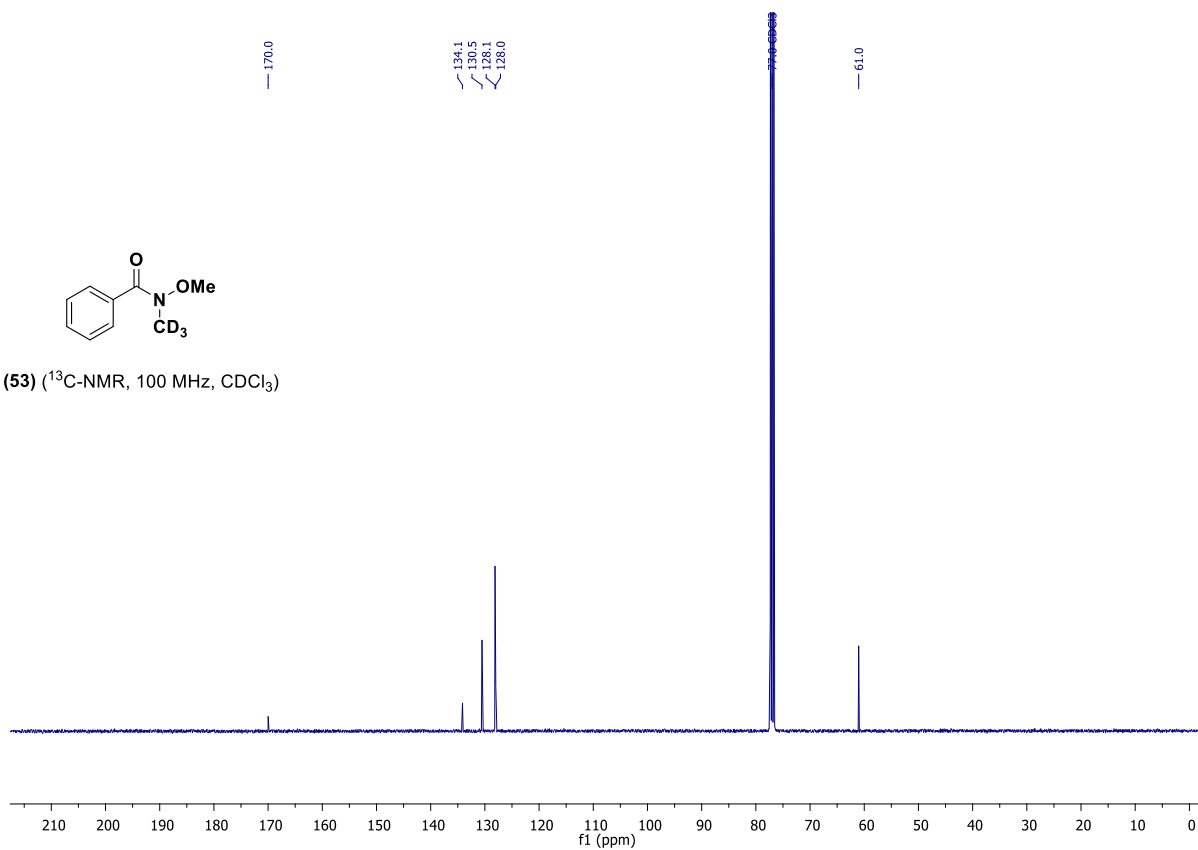

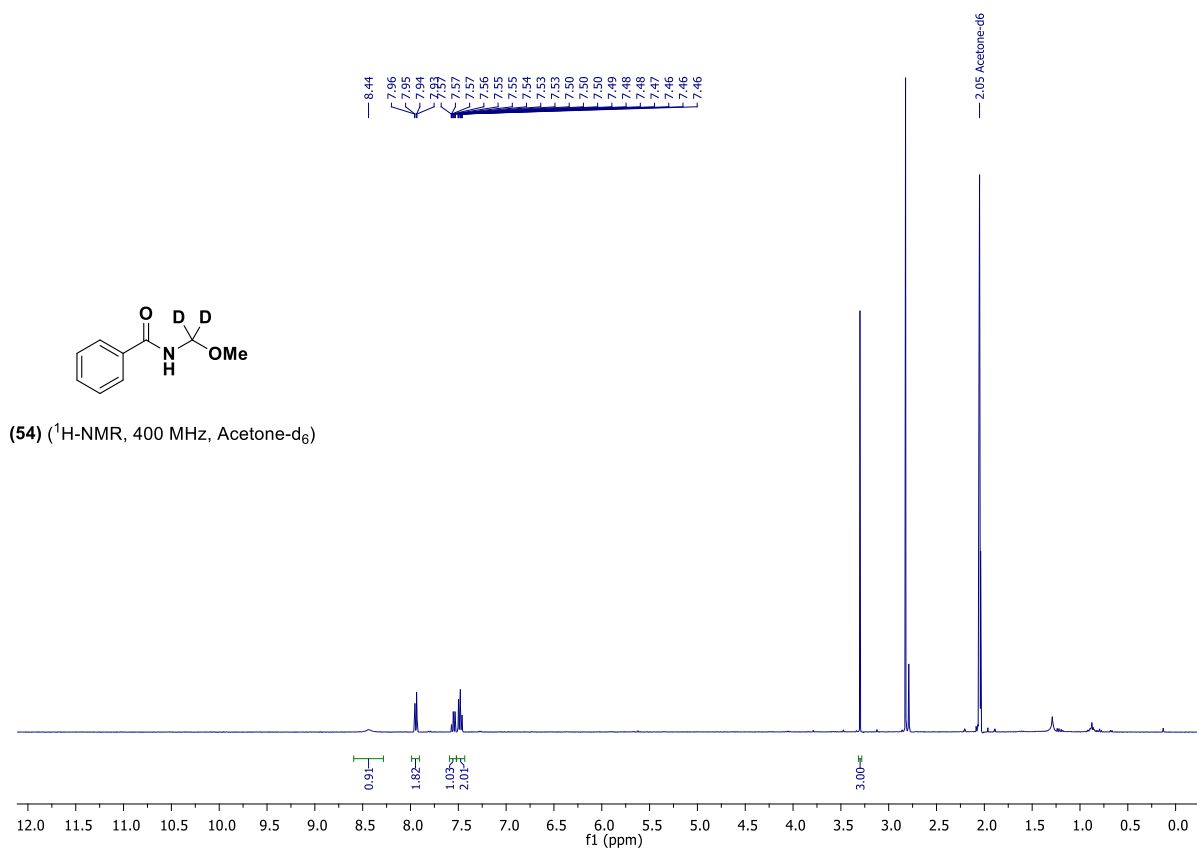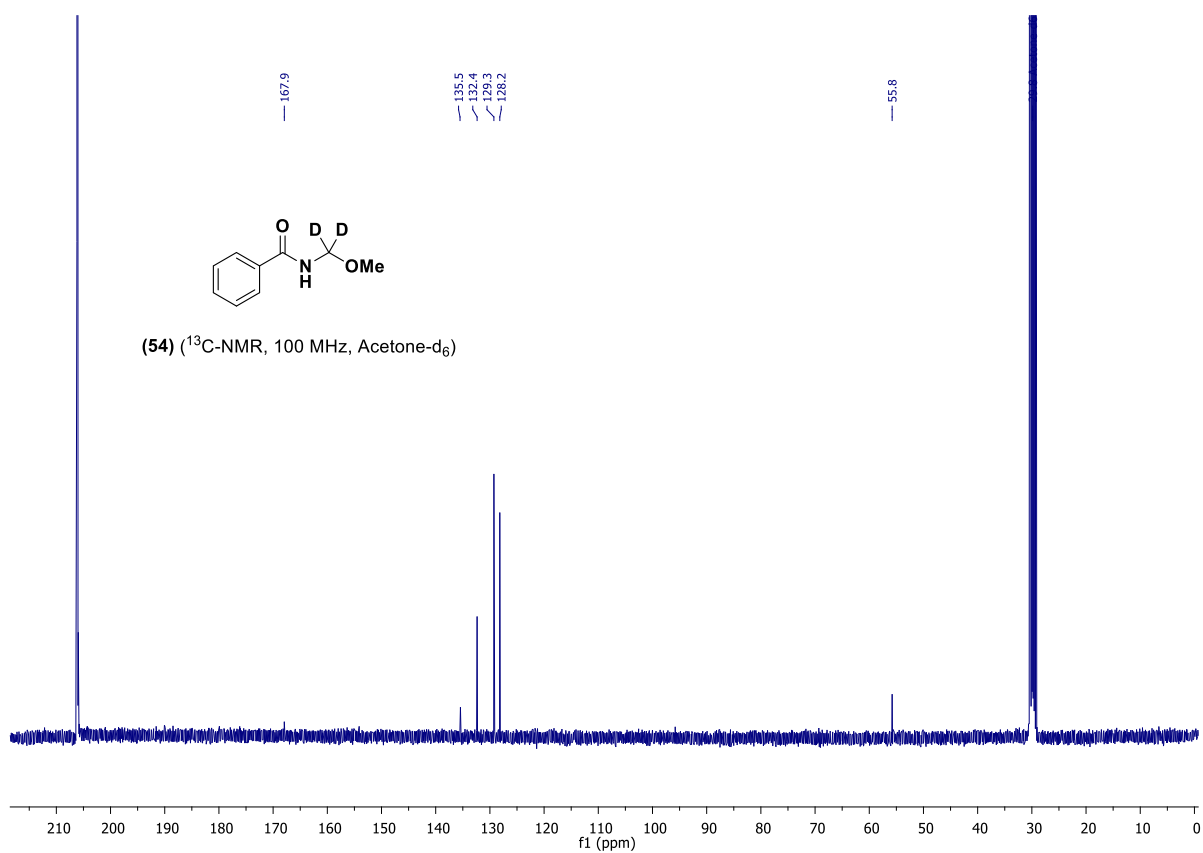

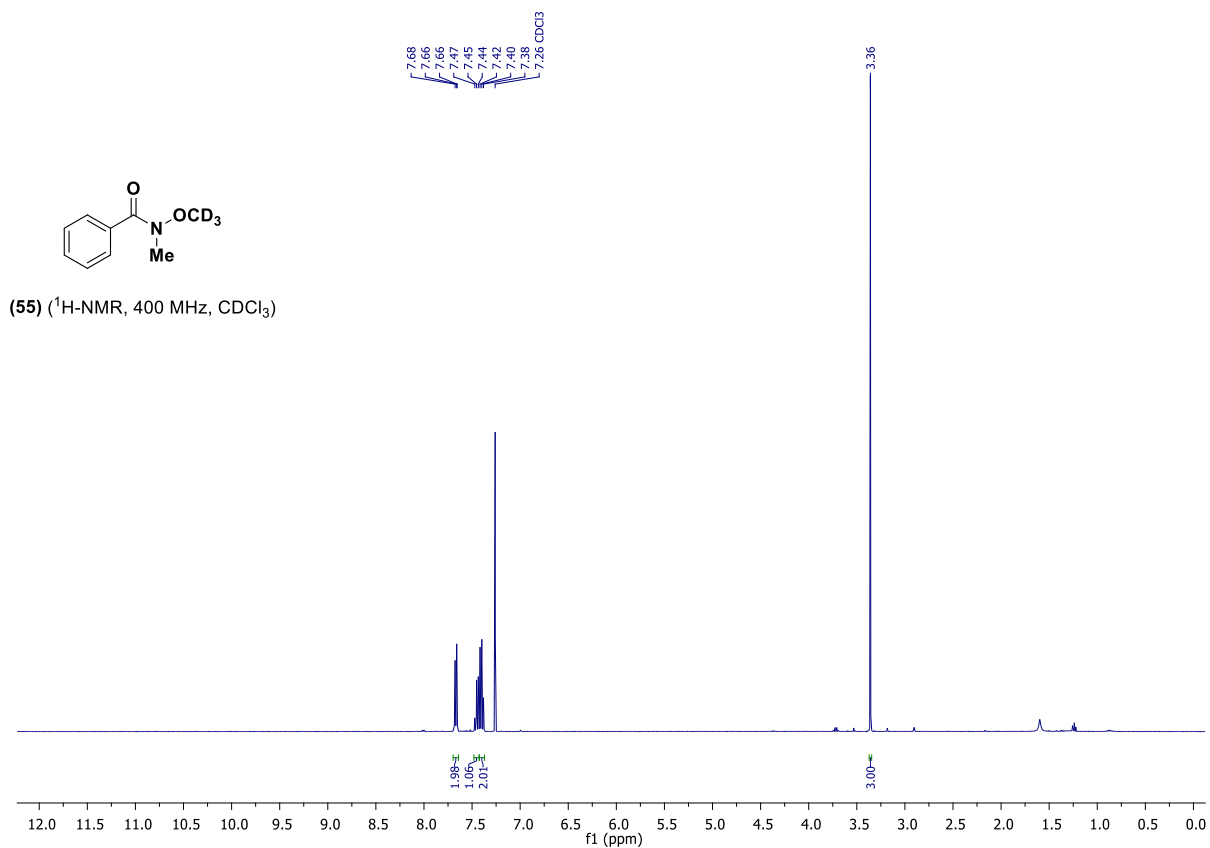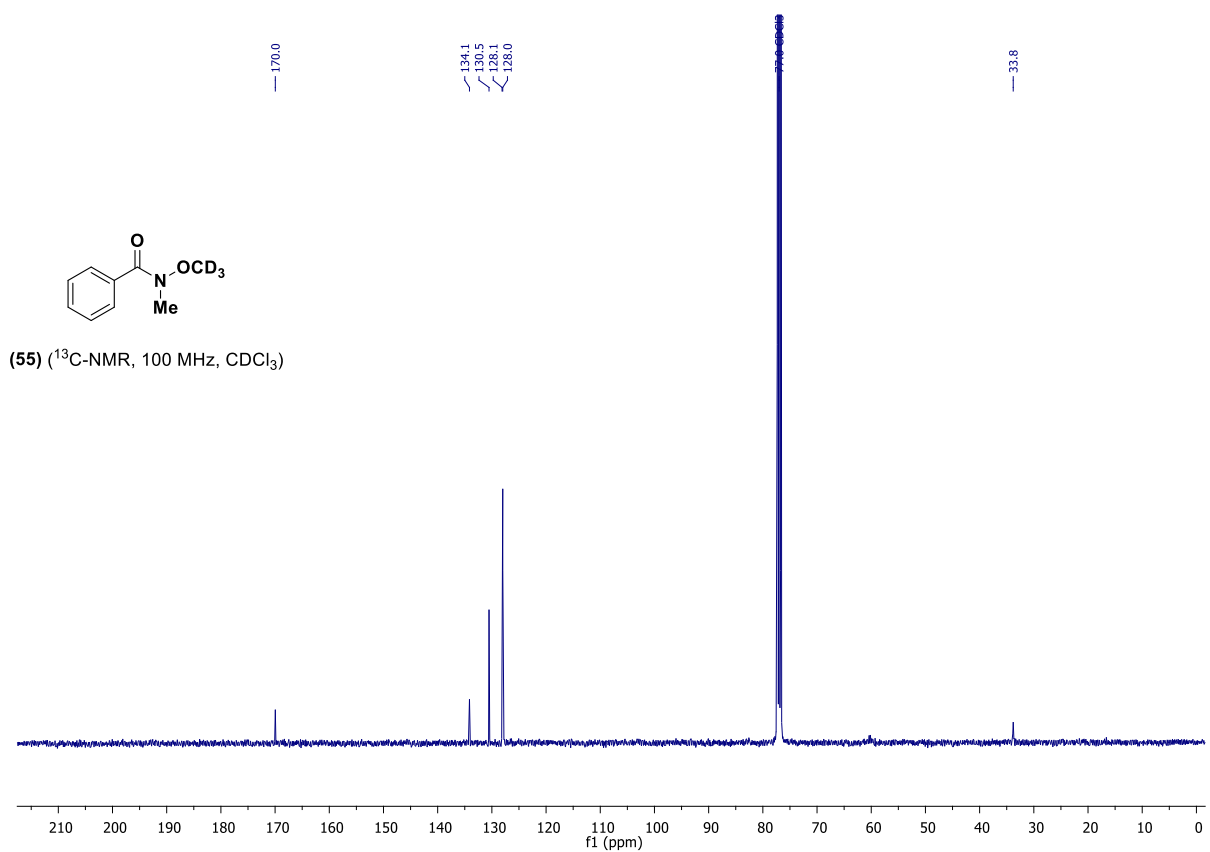

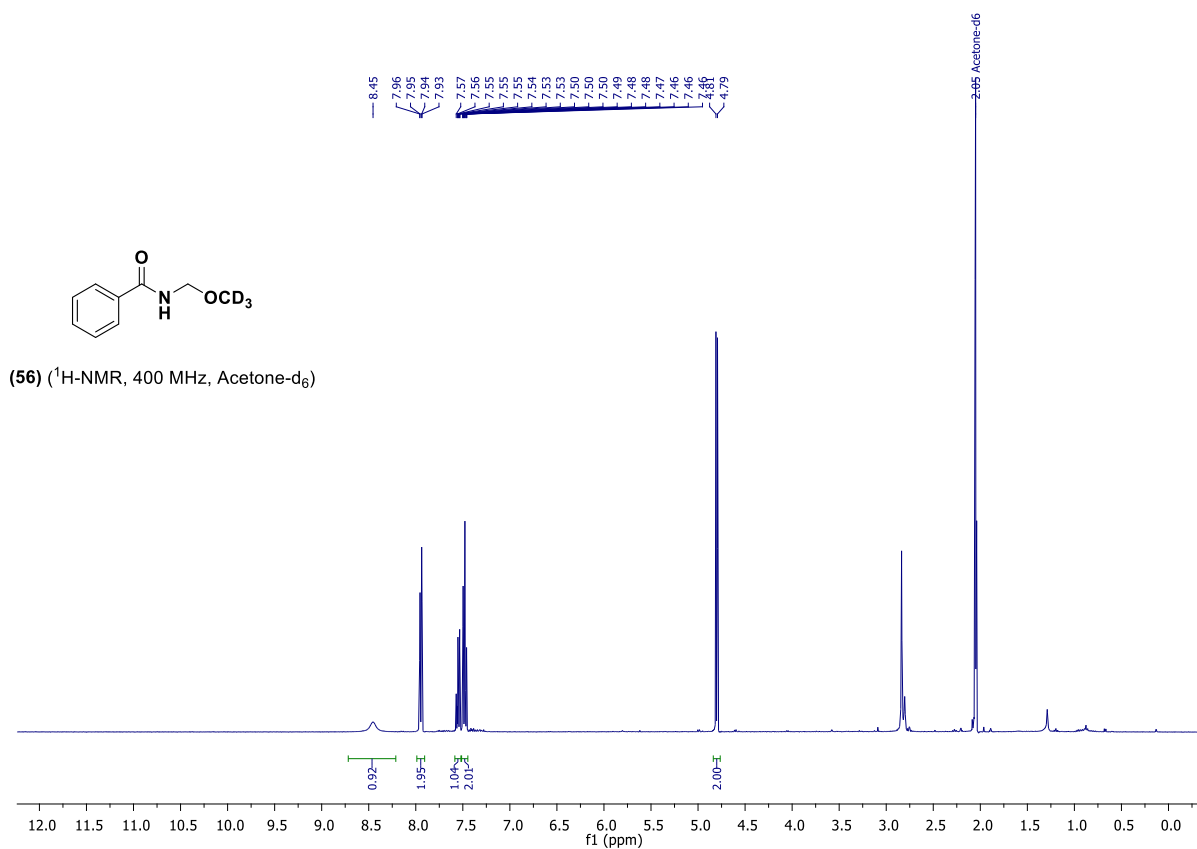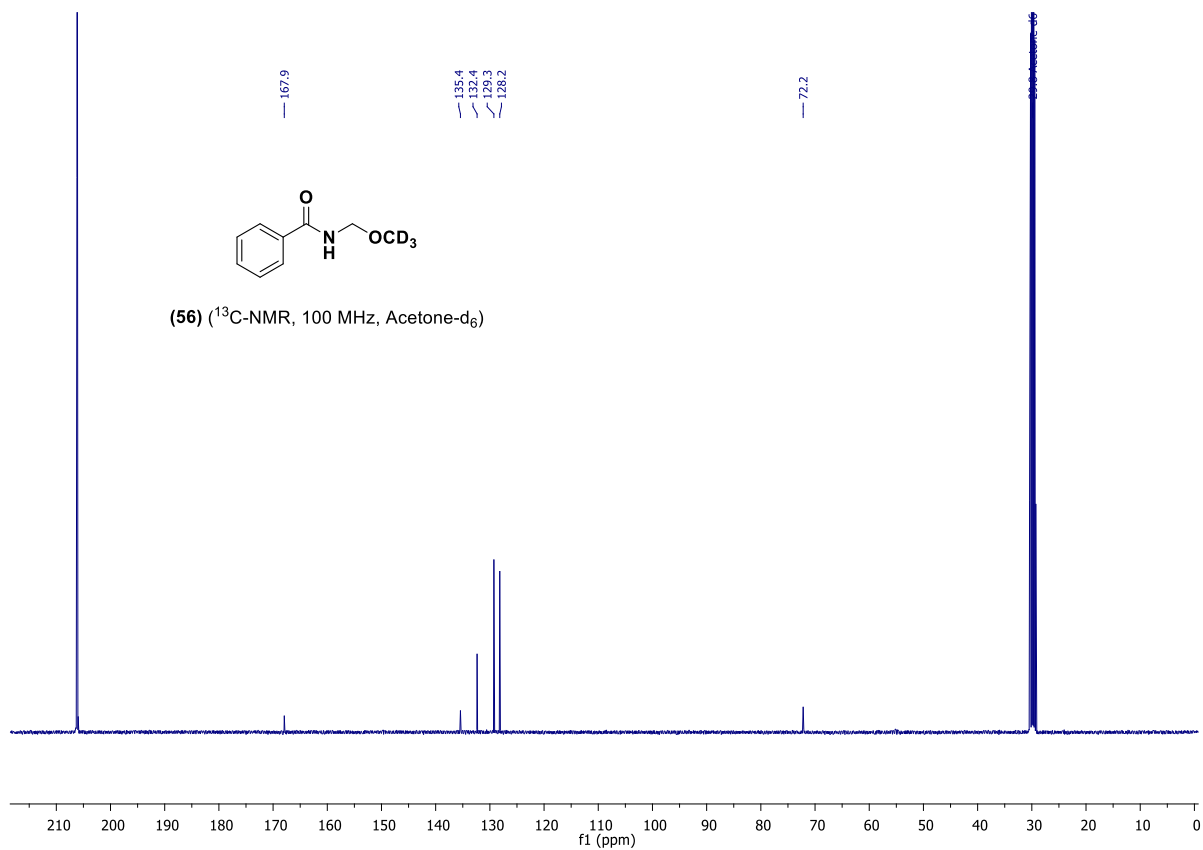

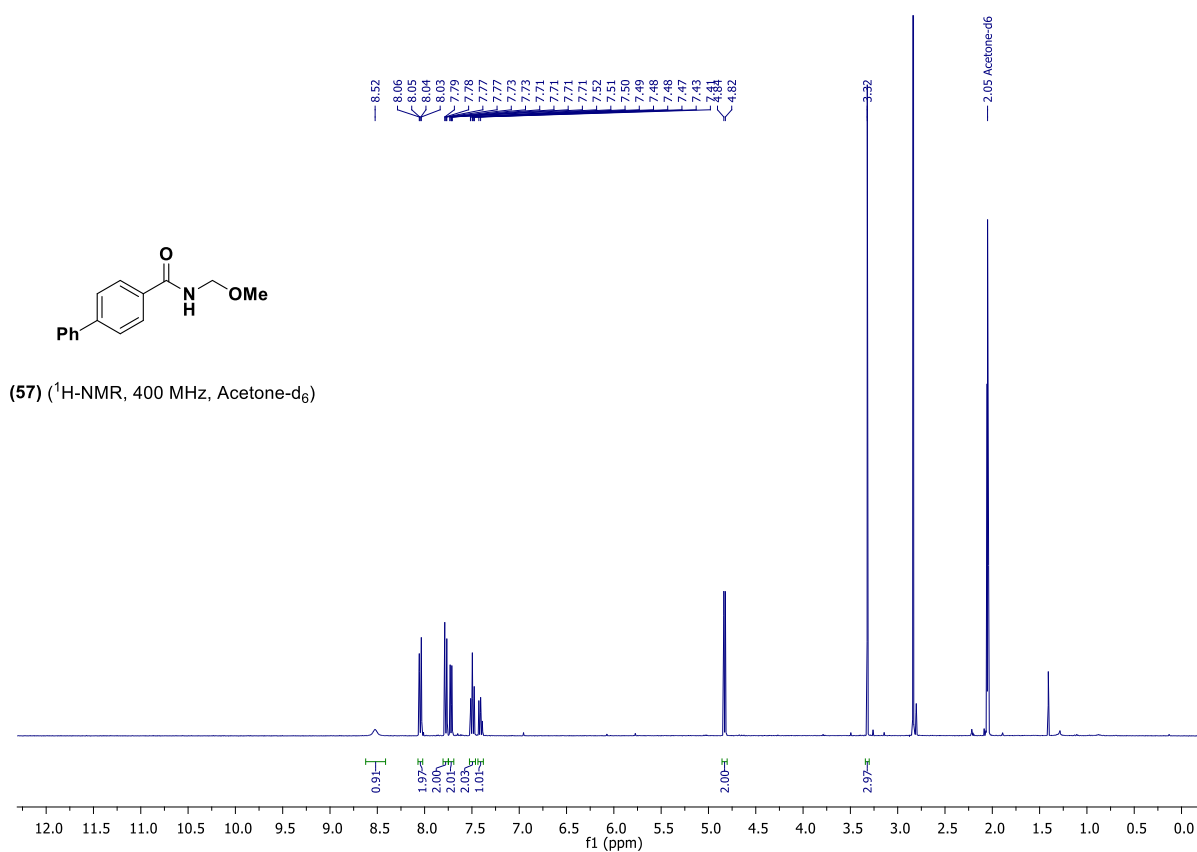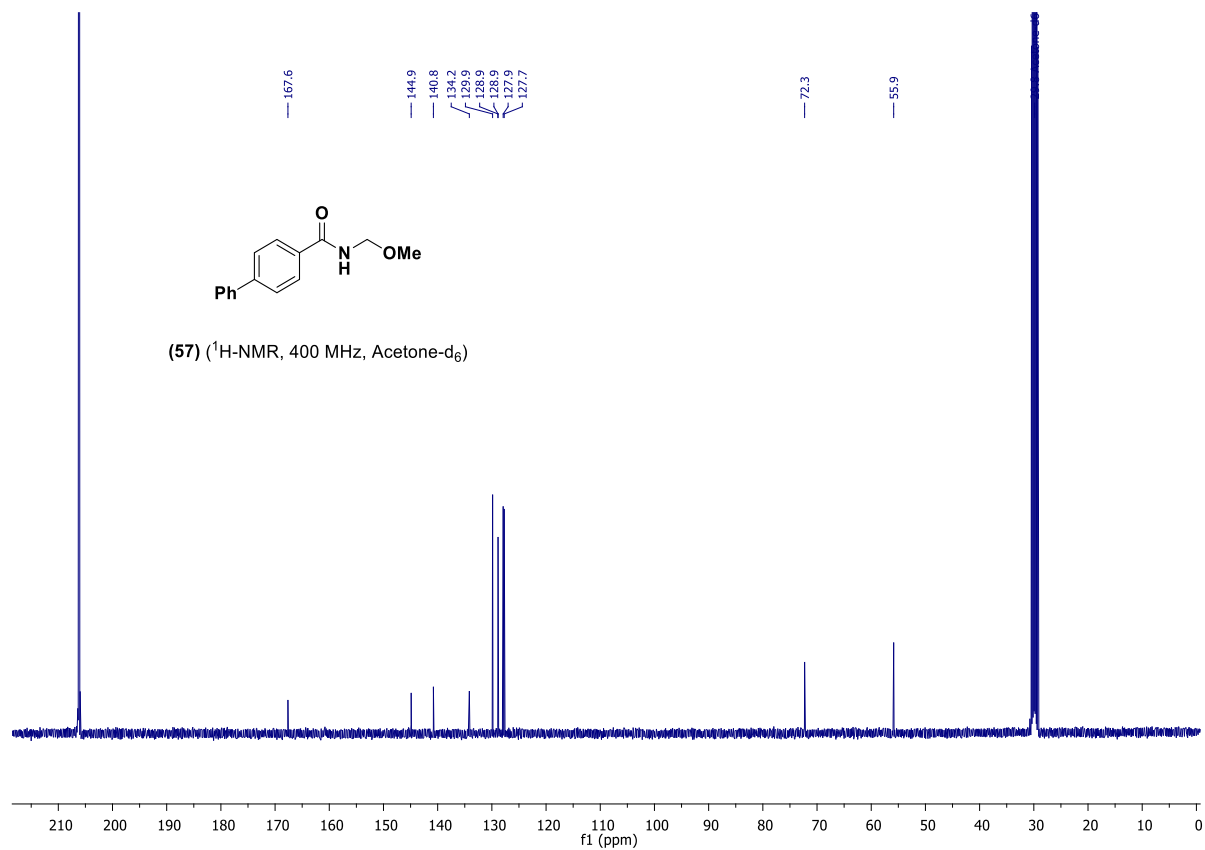

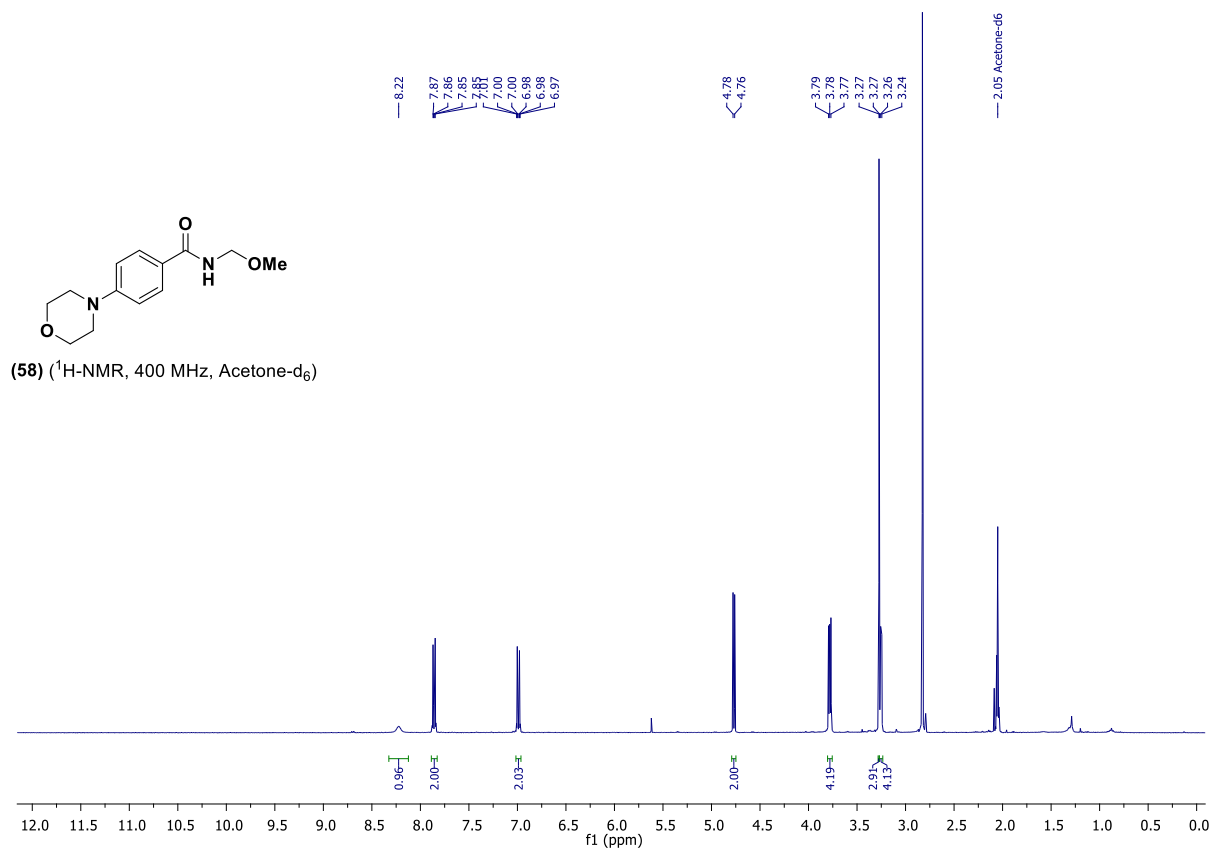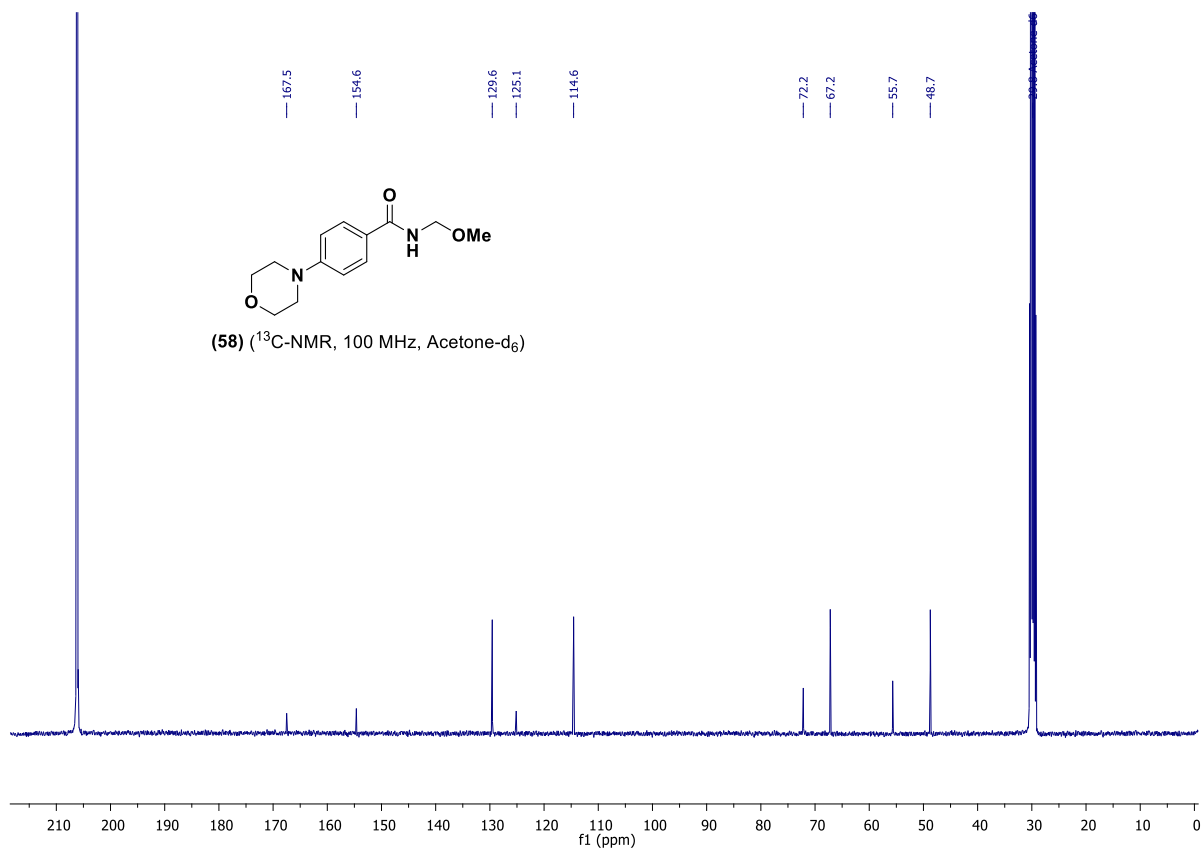

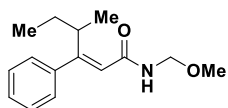

(60) ( $^1\text{H}$ -NMR, 400 MHz,  $\text{C}_6\text{D}_6$ )

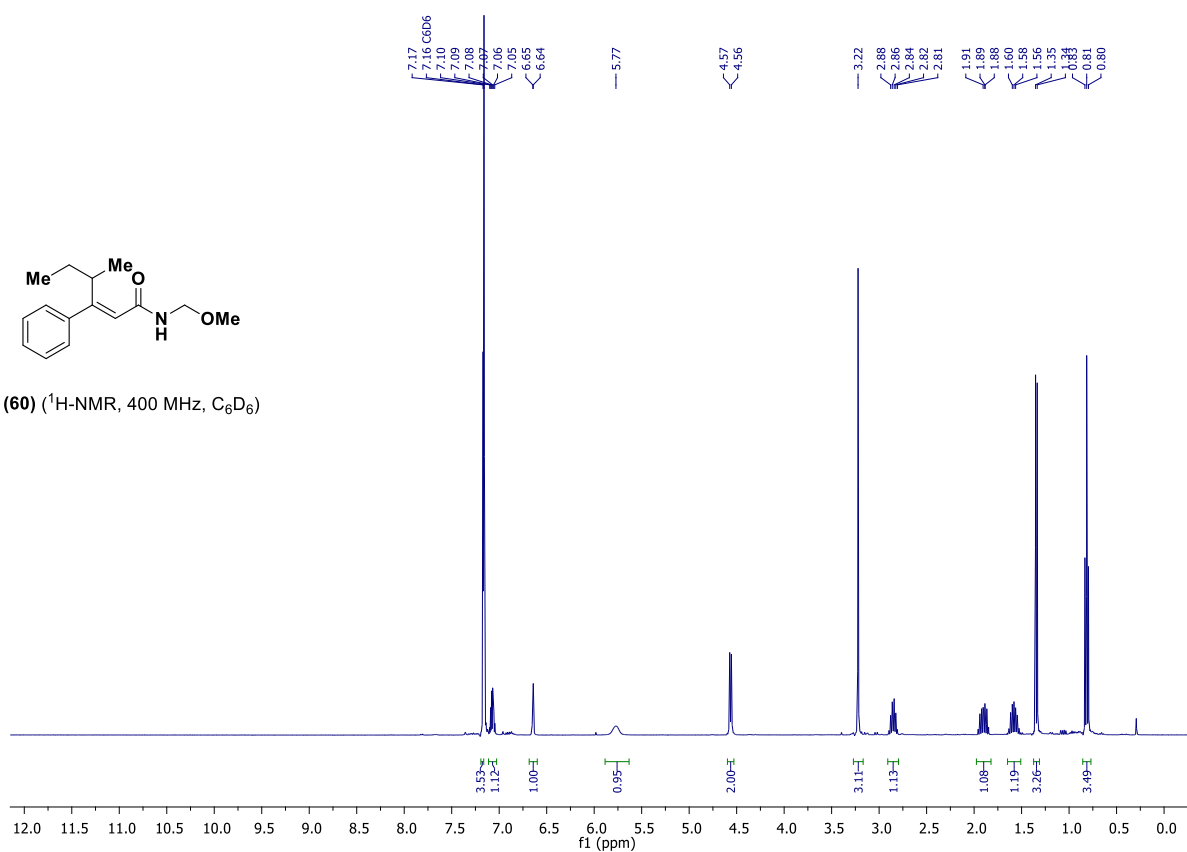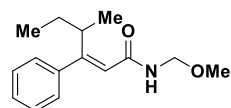

(60) ( $^{13}\text{C}$ -NMR, 100 MHz,  $\text{C}_6\text{D}_6$ )

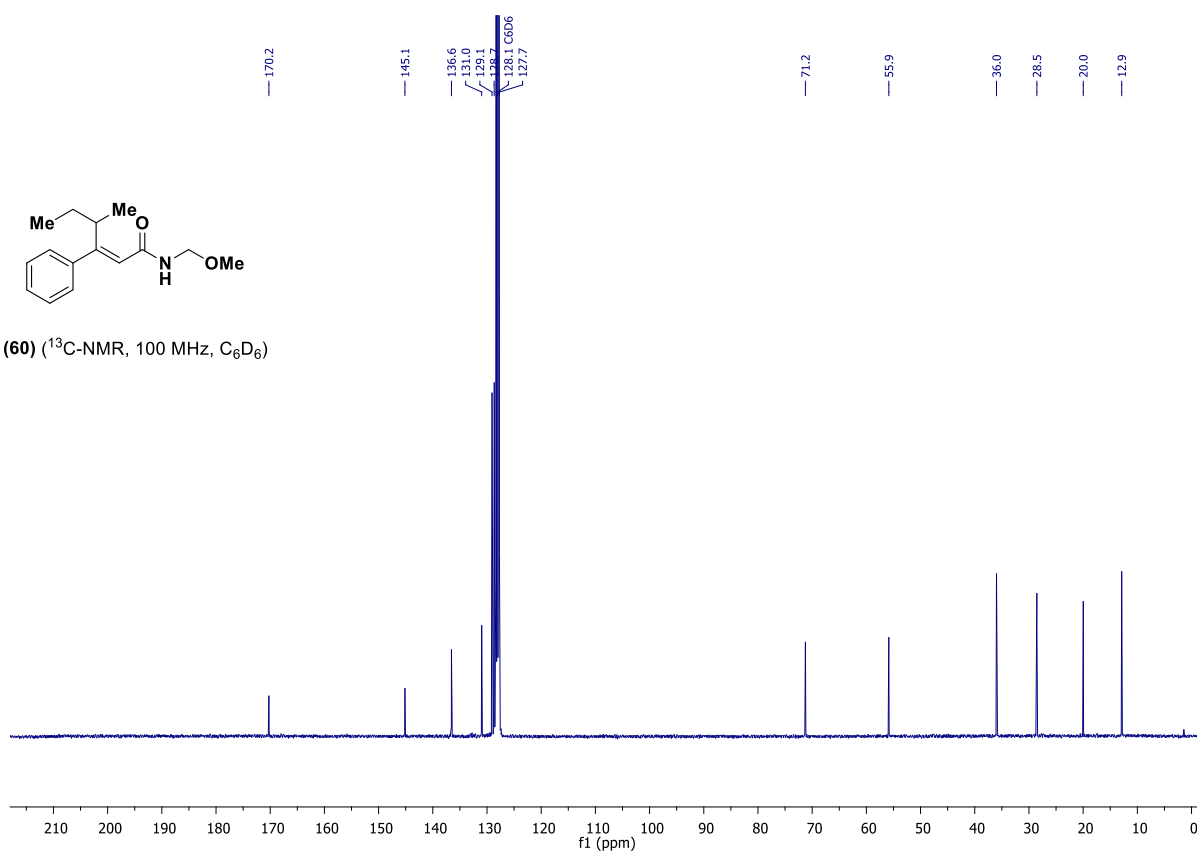

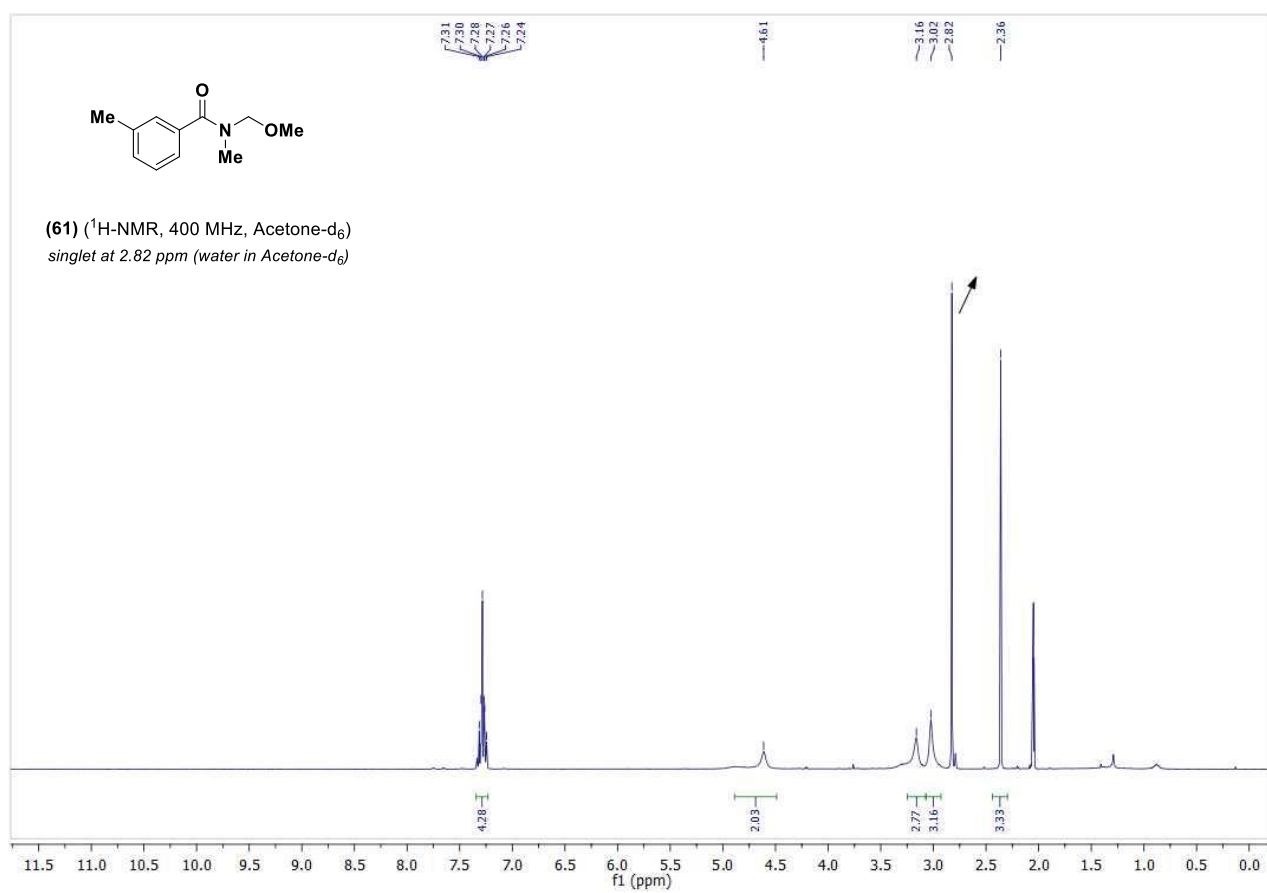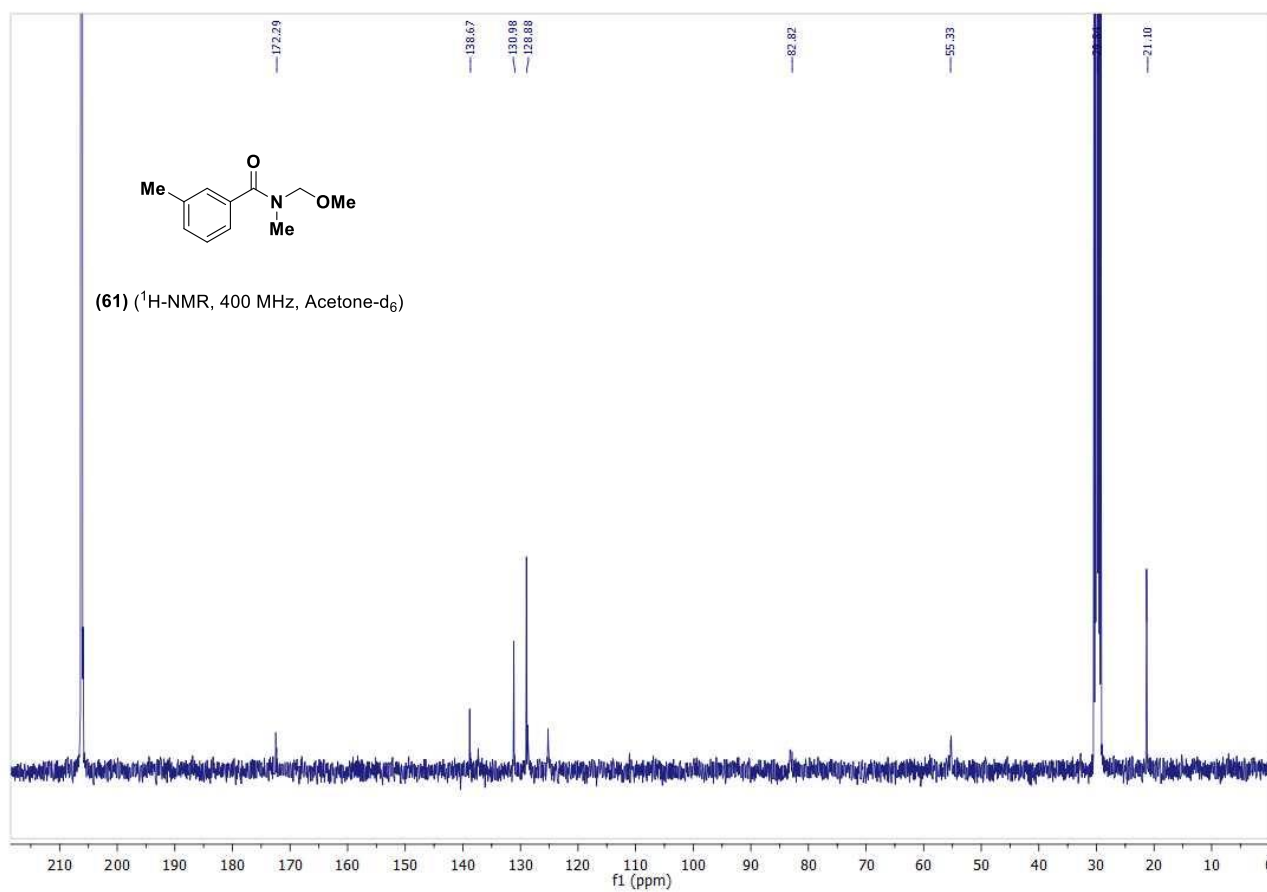

**Copies of heteronuclei NMR ( $^{19}\text{F}$ -,  $^{77}\text{Se}$ - and  $^{119}\text{Sn}$ ) spectra**

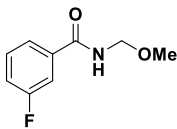

(24) ( $^{19}\text{F}$ -NMR, 376 MHz,  $\text{CDCl}_3$ )

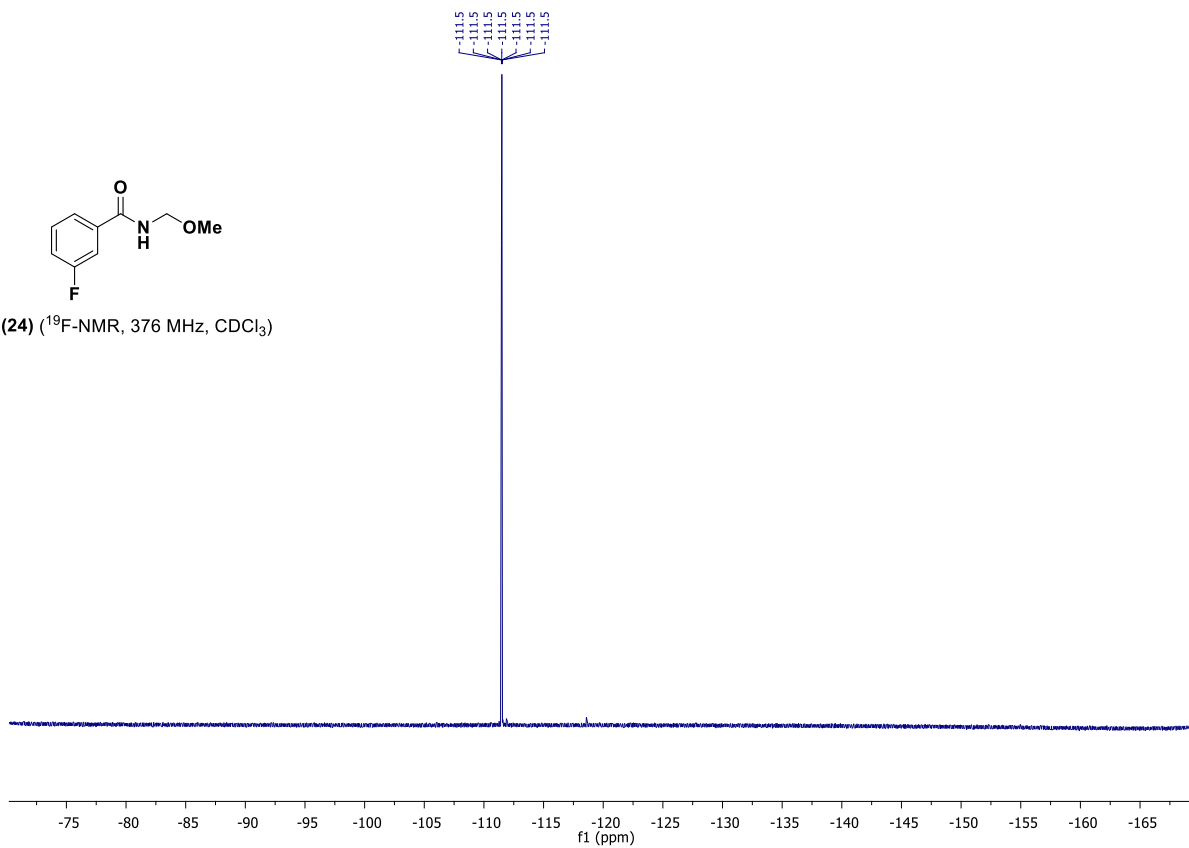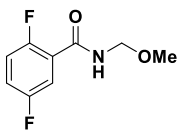

(25) ( $^{19}\text{F}$ -NMR, 376 MHz,  $\text{CDCl}_3$ )

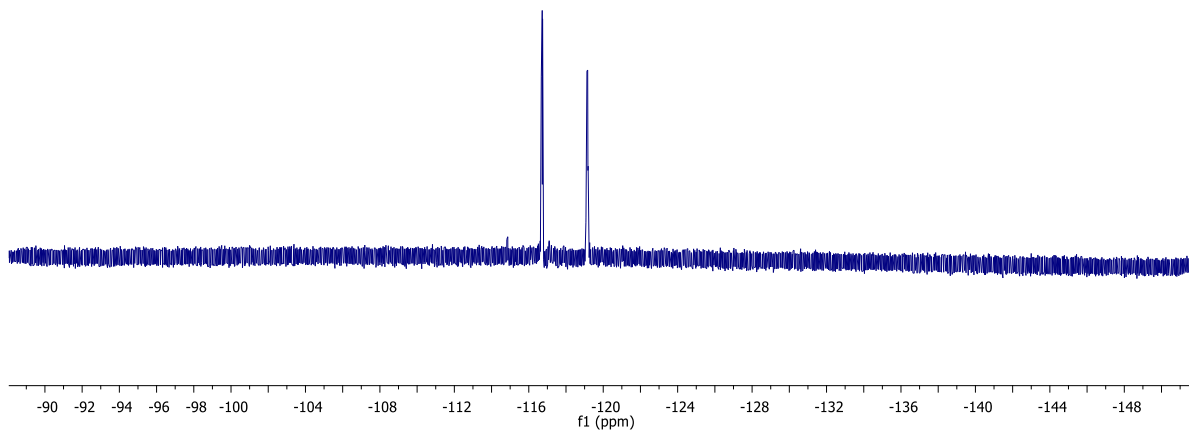

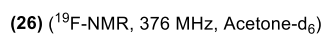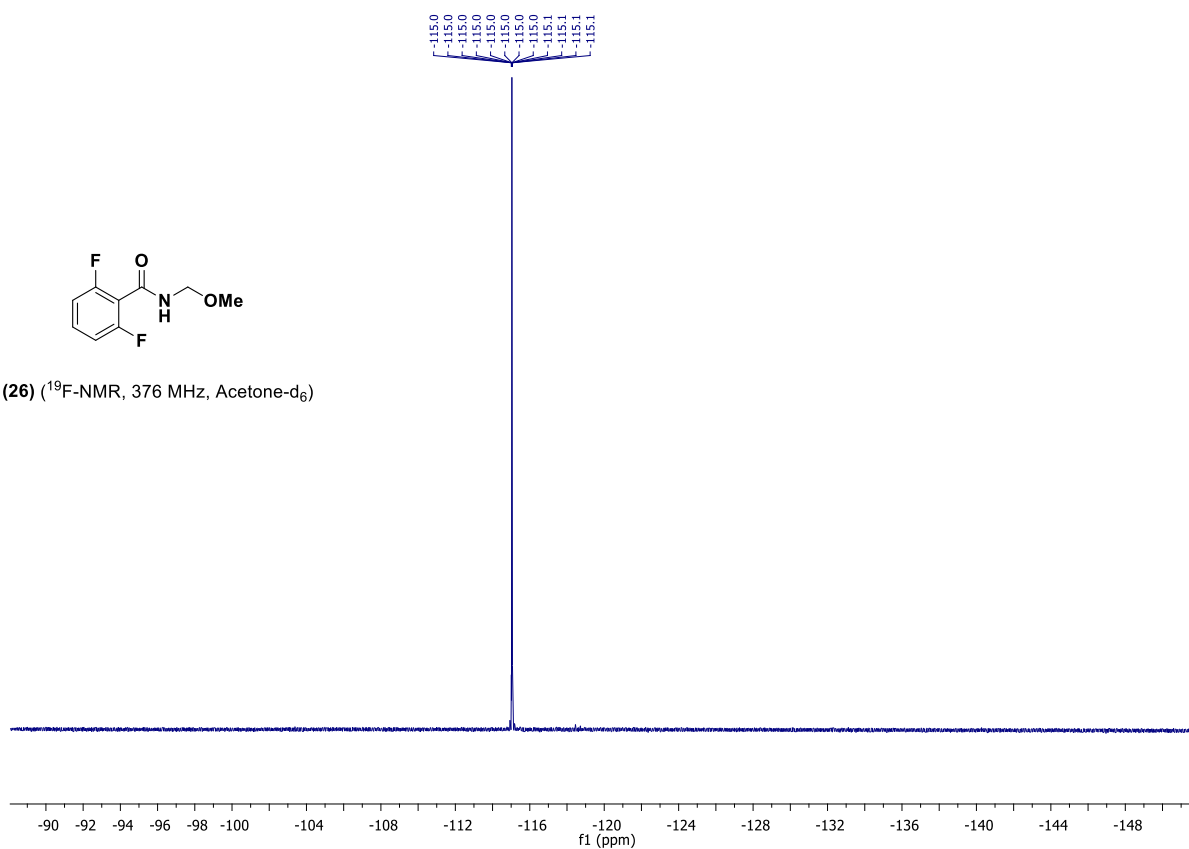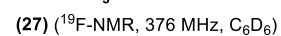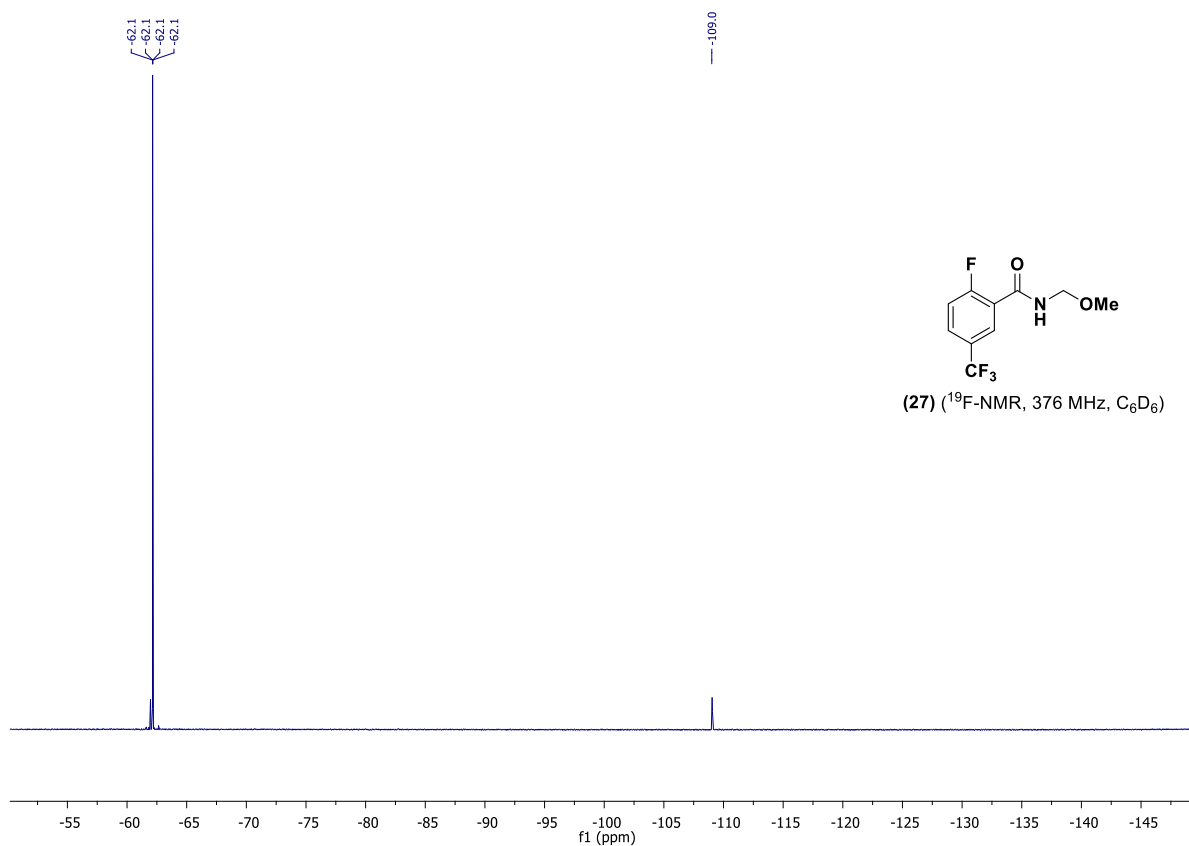

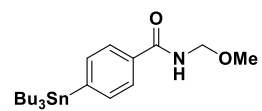

(34) ( $^{119}\text{Sn}$ -NMR, 149 MHz,  $\text{C}_6\text{D}_6$ )

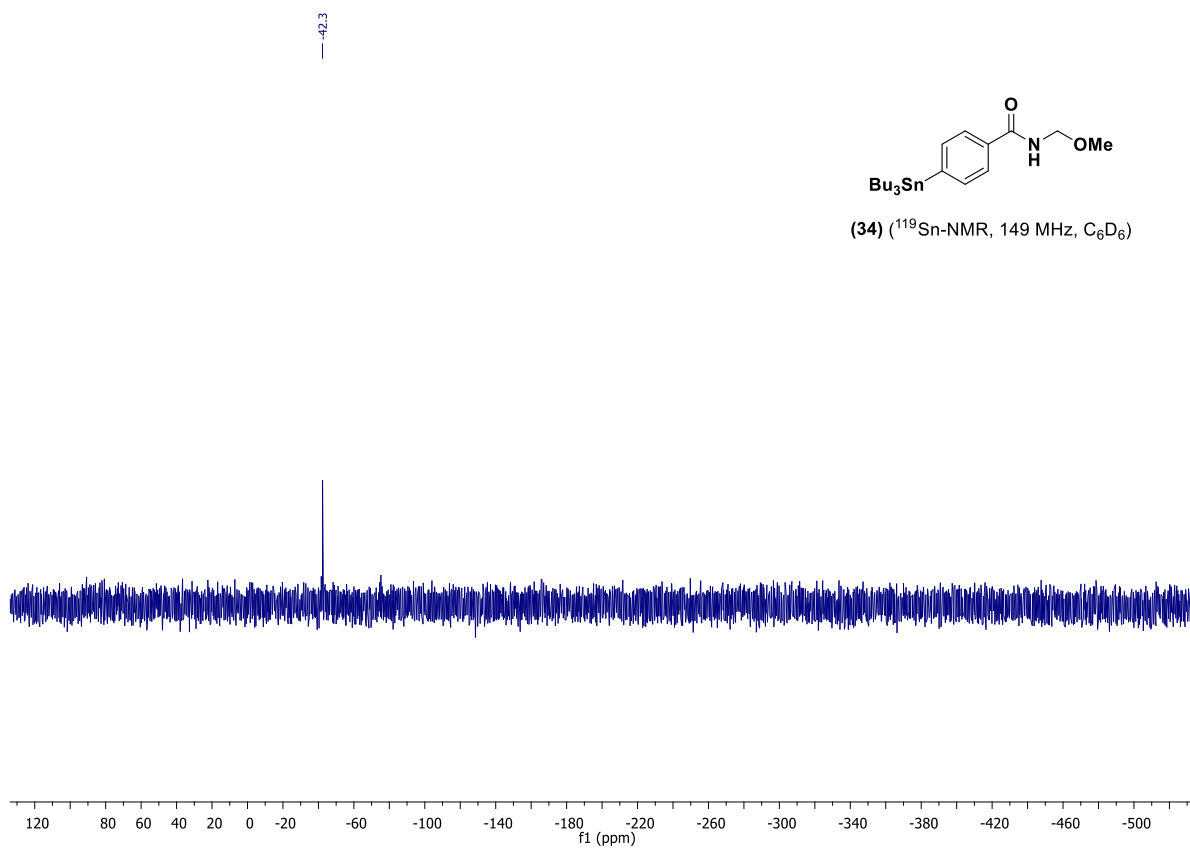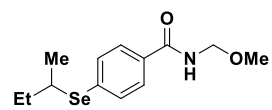

(35) ( $^{77}\text{Se}$ -NMR, 76 MHz, Acetone- $\text{d}_6$ )

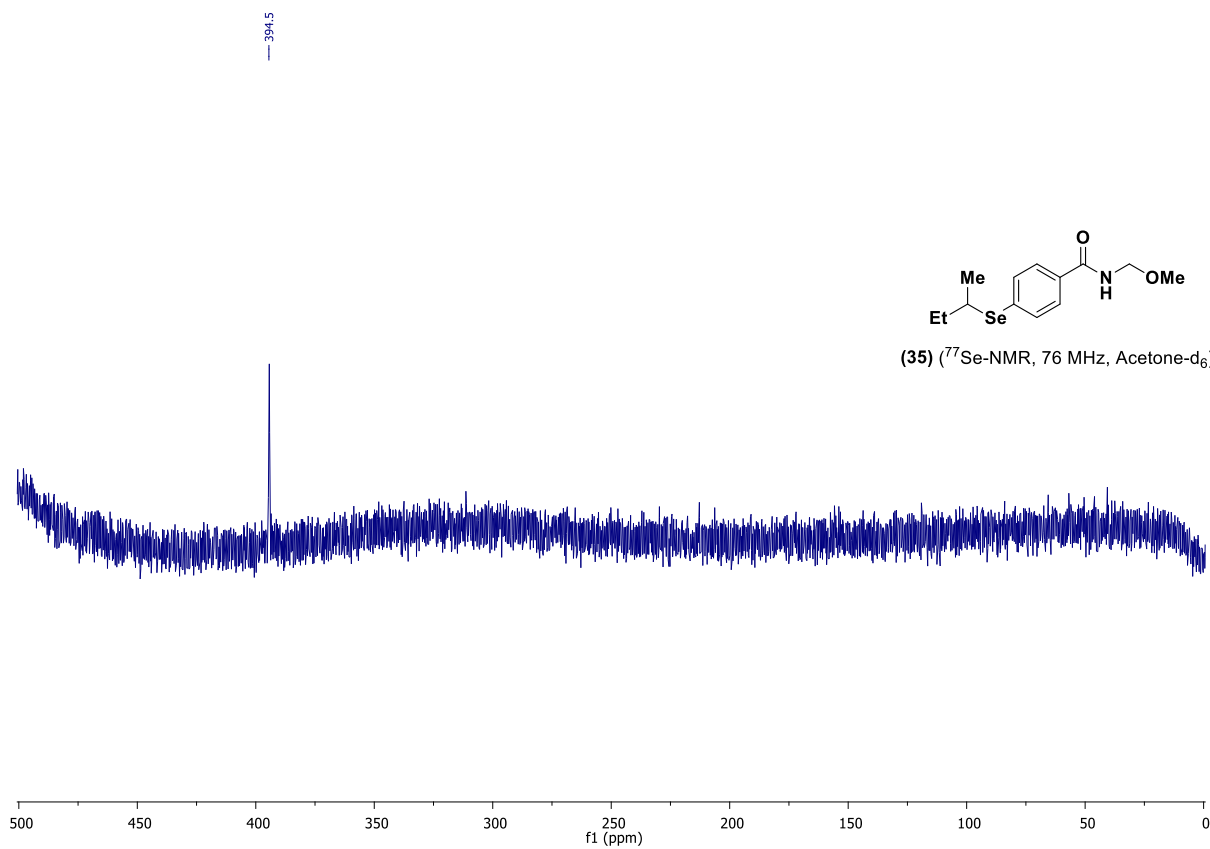

## X-ray analysis for compound\_17

The X-ray intensity data were measured on STOE STADIVARI diffractometer equipped with multilayer monochromator, Cu K/ $\alpha$  Primux 100 micro, micro focus sealed tube and Oxford cooling system. The structure solved by *charge flipping*. Non-hydrogen atoms were refined with *anisotropic displacement parameters*. Hydrogen atoms were inserted at calculated positions and refined with riding model. The following softwares were used: X-Area Integrate Software *package*, X-Area LANA for scaling, OLEX2<sup>[15]</sup> for structure solution, refinement, molecular diagrams and graphical user-interface, *Shelxl* for refinement and graphical user-interface *olex2.solve 1.5* for structure solution, *SHELXL-2015* for refinement, *Platon*<sup>i</sup> for symmetry check. Experimental data and CCDC-Codes Experimental data (Available online: <http://www.ccdc.cam.ac.uk/conts/retrieving.html>) can be found in Table 1. Crystal data, data collection parameters, and structure refinement details given in Table 2. Asymmetric Units visualized in Figure 1, intermolecular H-Bond in Figure 4. Data quality visualizations in Figure 2 and 3.

Table 1

| Compound    | Machine        | Source | Temp. | Detector Distance | Time/Frame | #Frames | Frame width | CCDC    |
|-------------|----------------|--------|-------|-------------------|------------|---------|-------------|---------|
|             |                |        | [K]   | [mm]              | [s]        |         | [°]         |         |
| 17 (MAL261) | Stoe Stadivari | Cu     | 100   | 40                | 2          | 2174    | 1           | 2191936 |

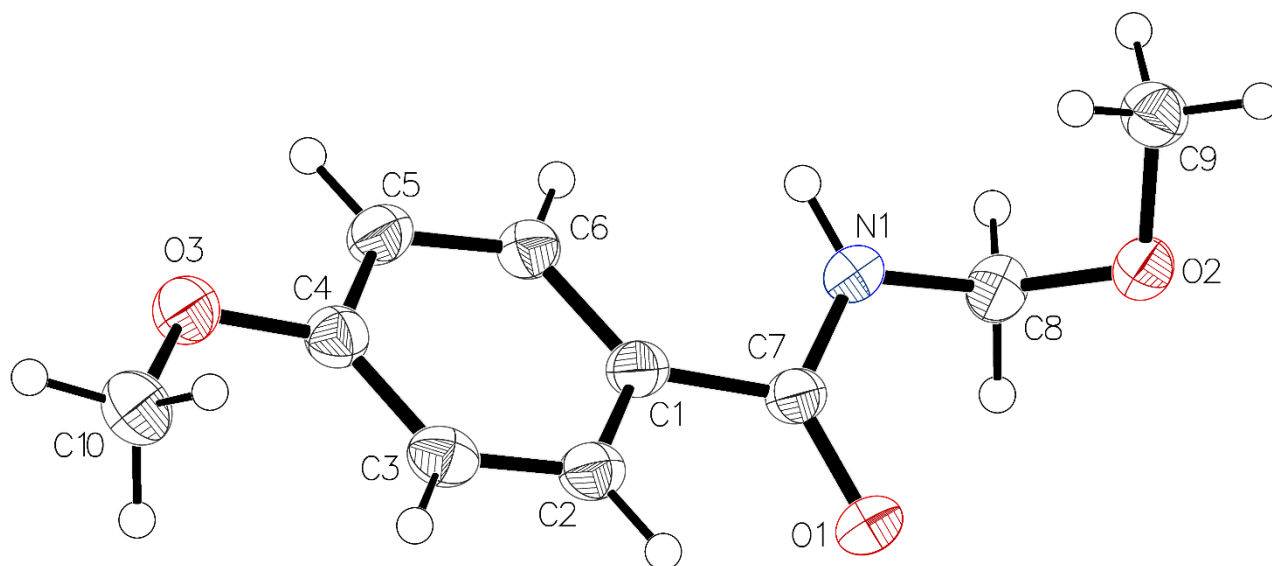

Figure 1 Asymmetric Unit (compound 17) drawn with 50% displacement ellipsoid. The bond precision for C-C single bonds is 0.0020Å.

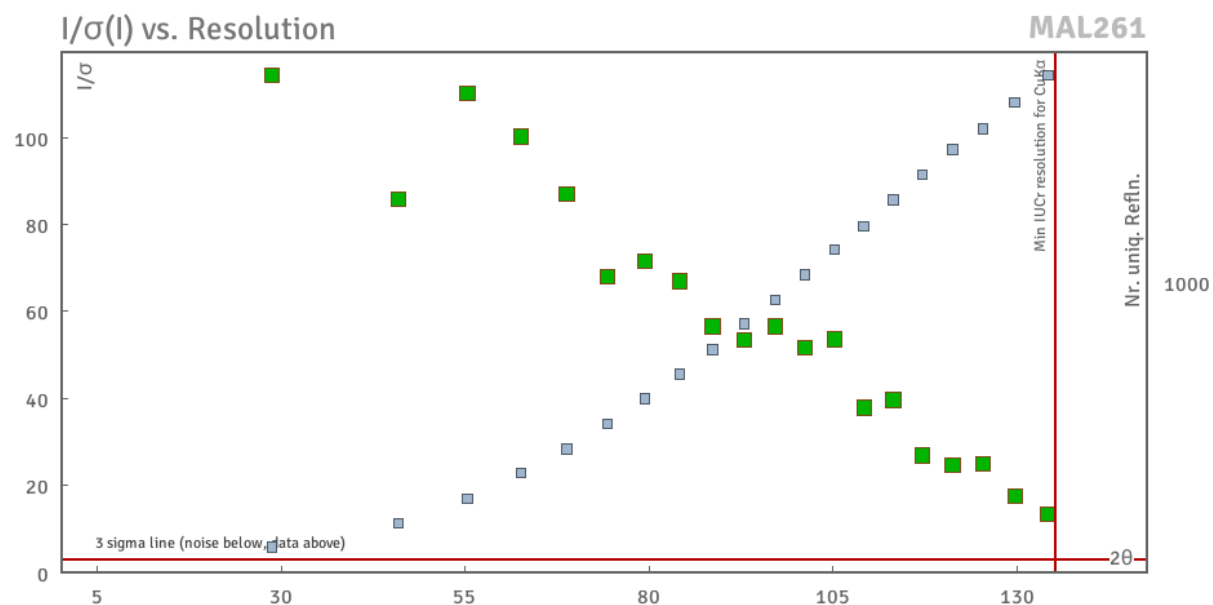

**Figure 2** Data Quality –  $I/\sigma(I)$  level view

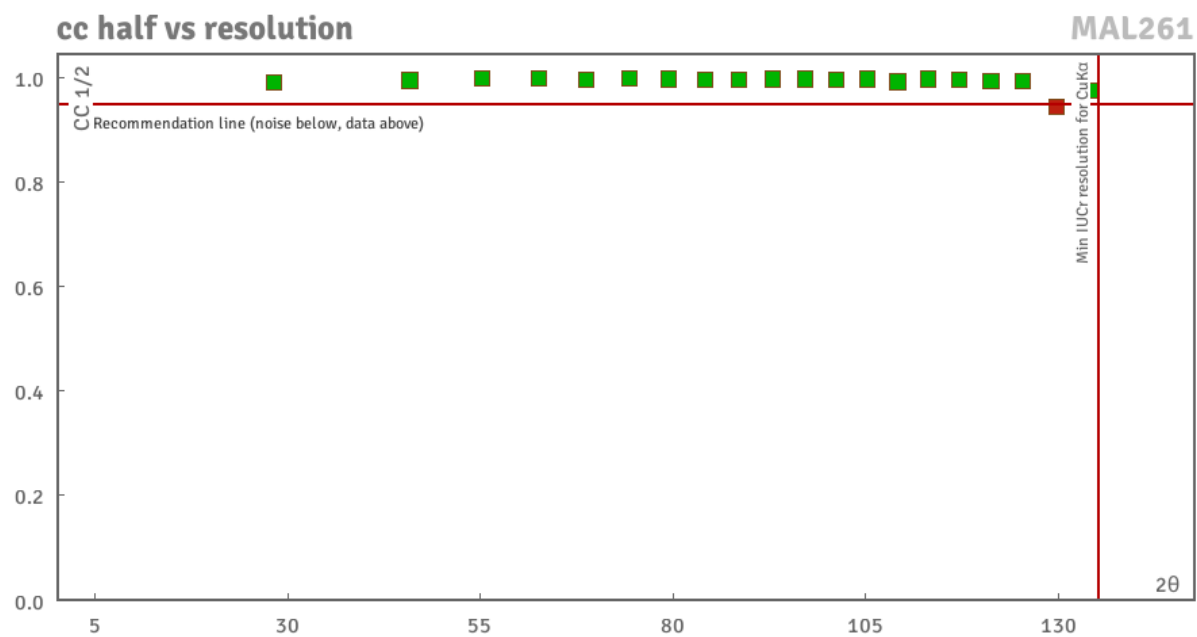

**Figure 3** Data Quality – CC 1/2 level view

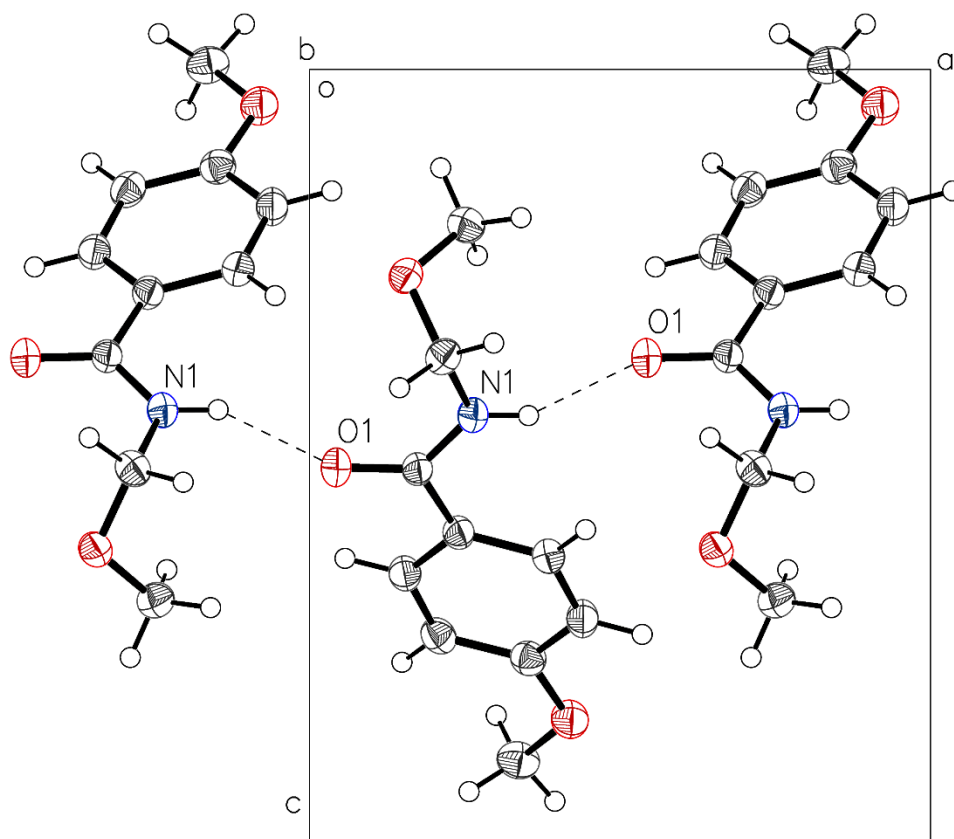

**Figure 4** Intermolecular H-Bonds of moderate character in direction of axis “a” influence the packing.

**Table 2** Sample and crystal data, data collection and structure refinement. Detailed information can found in the Cif Code of CCDC: 2191936

|                     |                                                 |
|---------------------|-------------------------------------------------|
| Identification code | MAL261                                          |
| Empirical formula   | C <sub>10</sub> H <sub>13</sub> NO <sub>3</sub> |
| Formula weight      | 195.21                                          |
| Temperature/K       | 100                                             |
| Crystal system      | orthorhombic                                    |
| Space group         | Pbca                                            |
| a/Å                 | 9.3359(13)                                      |
| b/Å                 | 10.169(3)                                       |
| c/Å                 | 20.658(3)                                       |
| α/°                 | 90                                              |
| β/°                 | 90                                              |

|                                                |                                                                   |
|------------------------------------------------|-------------------------------------------------------------------|
| $\gamma/^\circ$                                | 90                                                                |
| Volume/ $\text{\AA}^3$                         | 1961.2(7)                                                         |
| Z                                              | 8                                                                 |
| $\rho_{\text{calc}}/\text{g cm}^{-3}$          | 1.322                                                             |
| $\mu/\text{mm}^{-1}$                           | 0.813                                                             |
| F(000)                                         | 832.0                                                             |
| Crystal size/ $\text{mm}^3$                    | $0.3 \times 0.217 \times 0.1$                                     |
| Radiation                                      | Cu K $\alpha$ ( $\lambda = 1.54186$ )                             |
| 2 $\theta$ range for data collection/ $^\circ$ | 8.56 to 136.55                                                    |
| Index ranges                                   | $-11 \leq h \leq 3$ , $-12 \leq k \leq 11$ , $-23 \leq l \leq 24$ |
| Reflections collected                          | 11452                                                             |
| Independent reflections                        | 3563 [ $R_{\text{int}} = 0.0375$ , $R_{\text{sigma}} = 0.0212$ ]  |
| Data/restraints/parameters                     | 3563/0/130                                                        |
| Goodness-of-fit on $F^2$                       | 1.051                                                             |
| Final R indexes [ $ I  \geq 2\sigma(I)$ ]      | $R_1 = 0.0549$ , $wR_2 = 0.1523$                                  |
| Final R indexes [all data]                     | $R_1 = 0.0560$ , $wR_2 = 0.1541$                                  |
| Largest diff. peak/hole / $\text{e \AA}^{-3}$  | 0.28/-0.24                                                        |

## References

- [1] H. E. Gottlieb, V. Kotlyar, A. Nudelman, *J. Org. Chem.* **1997**, *62*, 7512-7515.
- [2] S. Touqeer, R. Senatore, M. Malik, E. Urban, V. Pace, *Adv. Synth. Catal.* **2020**, *362*, 5056-5061.
- [3] H. A. Duong, R. E. Gilligan, M. L. Cooke, R. J. Phipps, M. J. Gaunt, *Angew. Chem. Int. Ed.* **2011**, *50*, 463-466.
- [4] X. Wu, B. Wang, Y. Zhou, H. Liu, *Org. Lett.* **2017**, *19*, 1294-1297.
- [5] A. Nasier, X. Chang, C. Guo, *J. Org. Chem.* **2021**, *86*, 16068-16076.
- [6] G. X. Ortiz, Jr., B. N. Hemric, Q. Wang, *Org. Lett.* **2017**, *19*, 1314-1317.
- [7] N. Zhang, Q. Yu, R. Chen, J. Huang, Y. Xia, K. Zhao, *Chem. Commun.* **2013**, *49*, 9464-9466.
- [8] N. Guimond, S. I. Gorelsky, K. Fagnou, *J. Am. Chem. Soc.* **2011**, *133*, 6449-6457.
- [9] T. Sheradsky, E. Nov, *J. Chem. Soc., Perkin Trans. 1* **1980**, 2781-2786.
- [10] M. Allegretti, R. Bertini, M. C. Cesta, C. Bizzarri, R. Di Bitondo, V. Di Cioccio, E. Galliera, V. Berdini, A. Topai, G. Zampella, V. Russo, N. Di Bello, G. Nano, L. Nicolini, M. Locati, P. Fantucci, S. Florio, F. Colotta, *J. Med. Chem.* **2005**, *48*, 4312-4331.
- [11] F. Yang, L. Ackermann, *Org. Lett.* **2013**, *15*, 718-720.
- [12] F. Alonso, E. Lorenzo, M. Yus, *J. Org. Chem.* **1996**, *61*, 6058-6059.
- [13] Y. Fukui, P. Liu, Q. Liu, Z.-T. He, N.-Y. Wu, P. Tian, G.-Q. Lin, *J. Am. Chem. Soc.* **2014**, *136*, 15607-15614.
- [14] S. P. H. Mee, V. Lee, J. E. Baldwin, *Angew. Chem. Int. Ed.* **2004**, *43*, 1132-1136.
- [15] O. V. Dolomanov, L. J. Bourhis, R. J. Gildea, J. A. K. Howard, H. Puschmann, *J. Appl. Crystallogr.* **2009**, *42*, 339-341.
